# Supplementary material for: Abrogation of Stem Loop Binding Protein (Slbp) function leads to a failure of cells to transition from proliferation to differentiation, retinal coloboma and midline axon guidance deficits
Source: PLoS One. 2019 Jan 29;14(1):e0211073. doi: 10.1371/journal.pone.0211073 (PMC6350959; doi:10.1371/journal.pone.0211073)
Supplement: S2 Table — (Sheet 1) Upregulated genes sorted by q value. (Sheet 2). Upregulated genes sorted by log2(fold change). (Sheet 3) List of GO terms related to “Biological Process” generated using the AmiGO2 tool (The Gene Ontology Consortium) manually grouped into 14 categories (Listed in Fig 6B). (Sheet 4) Manual categories used to generate the GO term pie chart in Fig 6B’. (XLSX) [file pone.0211073.s005.xlsx]

## Sheet: q value sorted
test_id	gene_id	gene	locus	sample_1	sample_2	status	value_1	value_2	log2(fold_change)	test_stat	p_value	q_value	significant
XLOC_032274	XLOC_032274	CU459186.1	chr7:6752133 6816929	wt	ele	OK	0.477597	65.2774	7.09465	4.46572	5e-05	0.000441468	yes
XLOC_023590	XLOC_023590	zgc:112234	chr25:36213631 36243523	wt	ele	OK	0.695124	70.7136	6.66857	6.03576	5e-05	0.000441468	yes
XLOC_023588	XLOC_023588	CR762436.2	chr25:36193391 36193839	wt	ele	OK	2.2802	227.53	6.64075	16.6575	5e-05	0.000441468	yes
XLOC_033005	XLOC_033005	si:ch211 113a14.17 zgc:171759	chr7:76858600 76861019	wt	ele	OK	1.10716	104.246	6.55698	8.93494	5e-05	0.000441468	yes
XLOC_024896	XLOC_024896	hbaa1	chr3:55950129 55957631	wt	ele	OK	0.767249	71.5711	6.54354	9.66503	5e-05	0.000441468	yes
XLOC_032280	XLOC_032280	zgc:171759	chr7:6821748 6822388	wt	ele	OK	2.16027	200.252	6.53446	15.7063	5e-05	0.000441468	yes
XLOC_032284	XLOC_032284	ENSDARG00000091313 zgc:112234	chr7:7179427 7253207	wt	ele	OK	2.6798	238.895	6.4781	4.21778	5e-05	0.000441468	yes
XLOC_025121	XLOC_025121		chr3:6748684 6761576	wt	ele	OK	0.201247	17.2047	6.41769	5.74947	5e-05	0.000441468	yes
XLOC_033805	XLOC_033805	si:ch211 113a14.19	chr7:76855895 76857510	wt	ele	OK	2.78673	235.587	6.40154	7.46252	5e-05	0.000441468	yes
XLOC_023612	XLOC_023612	si:ch211 113a14.12	chr25:37321227 37406941	wt	ele	OK	20.4599	1641.71	6.32625	7.83556	5e-05	0.000441468	yes
XLOC_033118	XLOC_033118	ENSDARG00000086666 HIST1H4H zgc:112234	chr7:7280419 7284344	wt	ele	OK	4.3828	326.105	6.21734	9.27149	5e-05	0.000441468	yes
XLOC_033800	XLOC_033800	si:ch211 113a14.19	chr7:76847278 76848026	wt	ele	OK	2.05749	150.085	6.18876	6.4538	5e-05	0.000441468	yes
XLOC_032283	XLOC_032283	CU457819.2 CU457819.3 zgc:112234	chr7:7179427 7253207	wt	ele	OK	0.729219	52.6935	6.17513	2.33374	5e-05	0.000441468	yes
XLOC_024030	XLOC_024030	CABZ01086354.1	chr25:36184798 36185776	wt	ele	OK	1.76302	122.424	6.11769	13.1479	5e-05	0.000441468	yes
XLOC_032276	XLOC_032276	zgc:171759	chr7:6752133 6816929	wt	ele	OK	4.7218	327.739	6.11707	13.673	5e-05	0.000441468	yes
XLOC_033804	XLOC_033804	si:ch211 113a14.14	chr7:76853846 76855710	wt	ele	OK	5.38534	353.38	6.03604	12.0134	5e-05	0.000441468	yes
XLOC_033117	XLOC_033117	FP325123.1	chr7:7269905 7271457	wt	ele	OK	2.57342	155.433	5.91646	8.46348	5e-05	0.000441468	yes
XLOC_023616	XLOC_023616	H2AFX si:ch211 113a14.18 si:ch211 113a14.19 si:ch211 113a14.29 zgc:173652	chr25:37321227 37406941	wt	ele	OK	8.27999	497.737	5.90961	4.09512	5e-05	0.000441468	yes
XLOC_016539	XLOC_016539	mir181b 1	chr2:45250119 45253511	wt	ele	OK	1.99429	114.61	5.84471	10.7191	5e-05	0.000441468	yes
XLOC_032285	XLOC_032285	CU457819.2 zgc:114037	chr7:7179427 7253207	wt	ele	OK	7.61538	437.035	5.84269	7.28668	5e-05	0.000441468	yes
XLOC_033001	XLOC_033001	si:ch211 113a14.19 wu:fe38f03 zgc:163061 zgc:173552	chr7:76822429 76828385	wt	ele	OK	3.65654	208.262	5.83177	7.16817	5e-05	0.000441468	yes
XLOC_023589	XLOC_023589	H2AFX	chr25:36194693 36195092	wt	ele	OK	1.47366	82.534	5.80752	11.5703	5e-05	0.000441468	yes
XLOC_023582	XLOC_023582	CU302436.2 CU302436.3 HIST2H3D hist2h3c zgc:112234	chr25:36106411 36181919	wt	ele	OK	29.5418	1631.02	5.78688	5.53379	5e-05	0.000441468	yes
XLOC_032292	XLOC_032292	zgc:112234	chr7:7280419 7284344	wt	ele	OK	1.37888	72.2716	5.71186	10.4893	5e-05	0.000441468	yes
XLOC_033120	XLOC_033120	zgc:114037	chr7:7285383 7287762	wt	ele	OK	1.25904	64.4559	5.67792	5.06414	5e-05	0.000441468	yes
XLOC_033003	XLOC_033003	si:ch211 113a14.19	chr7:76847278 76848026	wt	ele	OK	1.60432	80.7594	5.6536	9.6001	5e-05	0.000441468	yes
XLOC_026988	XLOC_026988	si:dkey 149m13.1	chr4:54829812 54839184	wt	ele	OK	0.466694	22.6028	5.59788	7.81808	5e-05	0.000441468	yes
XLOC_024036	XLOC_024036	CR762436.1	chr25:36202829 36203429	wt	ele	OK	0.757361	35.8375	5.56435	9.12426	5e-05	0.000441468	yes
XLOC_024023	XLOC_024023	PGBD4	chr25:36106411 36181919	wt	ele	OK	3.46735	162.653	5.55182	6.02125	5e-05	0.000441468	yes
XLOC_006938	XLOC_006938	5S_rRNA	chr13:53800340 53801811	wt	ele	OK	0.679264	30.5687	5.49194	3.90012	5e-05	0.000441468	yes
XLOC_033119	XLOC_033119	zgc:112234	chr7:7280419 7284344	wt	ele	OK	2.48814	108.898	5.45177	9.39976	5e-05	0.000441468	yes
XLOC_033801	XLOC_033801	zgc:163061	chr7:76848732 76849489	wt	ele	OK	4.14925	175.629	5.40354	16.4899	5e-05	0.000441468	yes
XLOC_032290	XLOC_032290	zgc:112234	chr7:7179427 7253207	wt	ele	OK	1.96584	80.3813	5.35365	2.34633	5e-05	0.000441468	yes
XLOC_024018	XLOC_024018	zgc:112234	chr25:36105240 36106017	wt	ele	OK	5.23621	195.957	5.22587	10.1645	5e-05	0.000441468	yes
XLOC_032277	XLOC_032277	HIST1H4J si:ch211 113a14.10 zgc:112234	chr7:6752133 6816929	wt	ele	OK	3.56364	131.184	5.20209	4.54437	5e-05	0.000441468	yes
XLOC_033123	XLOC_033123	zgc:110425	chr7:7292642 7293938	wt	ele	OK	0.537253	17.7705	5.04774	8.83352	5e-05	0.000441468	yes
XLOC_024033	XLOC_024033	HIST1H2BA	chr25:36196950 36197659	wt	ele	OK	4.02507	104.096	4.69276	9.19252	5e-05	0.000441468	yes
XLOC_033000	XLOC_033000	si:ch211 113a14.14 zgc:171759	chr7:76814612 76821593	wt	ele	OK	2.76869	69.2886	4.64534	12.3408	5e-05	0.000441468	yes
XLOC_001433	XLOC_001433	RBBP6	chr1:28104836 28111290	wt	ele	OK	2.31355	57.5357	4.63628	10.5737	5e-05	0.000441468	yes
XLOC_006606	XLOC_006606	CABZ01032351.1	chr13:19151297 19210069	wt	ele	OK	0.535143	13.1978	4.62424	5.62592	5e-05	0.000441468	yes
XLOC_033121	XLOC_033121	wu:fe11b02	chr7:7288538 7289624	wt	ele	OK	1.93595	43.6983	4.49646	10.7801	5e-05	0.000441468	yes
XLOC_035109	XLOC_035109	si:ch211 242m24.8	chr8:37637965 37655274	wt	ele	OK	0.0781405	1.66748	4.41545	4.36044	5e-05	0.000441468	yes
XLOC_017779	XLOC_017779	si:dkey 273g18.1	chr20:24477613 24484536	wt	ele	OK	0.331883	6.81365	4.35968	3.99537	5e-05	0.000441468	yes
XLOC_008361	XLOC_008361	ltc4s	chr14:14050970 14062593	wt	ele	OK	0.117083	2.32128	4.30932	3.7204	5e-05	0.000441468	yes
XLOC_031559	XLOC_031559		chr6:15917198 15929464	wt	ele	OK	0.0709879	1.38837	4.28968	5.46092	5e-05	0.000441468	yes
XLOC_028663	XLOC_028663		chr4:53970468 53977617	wt	ele	OK	0.108604	2.12245	4.28857	7.19432	5e-05	0.000441468	yes
XLOC_010254	XLOC_010254	zgc:162509	chr16:15730910 15741923	wt	ele	OK	0.221179	4.02038	4.18404	5.83857	5e-05	0.000441468	yes
XLOC_036795	XLOC_036795		chr9:52565999 52568031	wt	ele	OK	0.148626	2.63943	4.15047	4.78572	5e-05	0.000441468	yes
XLOC_028668	XLOC_028668		chr4:54975879 54978910	wt	ele	OK	0.0789392	1.37676	4.1244	4.56419	5e-05	0.000441468	yes
XLOC_007141	XLOC_007141	CABZ01032352.1	chr13:19151297 19210069	wt	ele	OK	1.23752	21.4374	4.11461	7.61647	5e-05	0.000441468	yes
XLOC_009469	XLOC_009469	si:dkey 13m3.2	chr15:11118221 11129502	wt	ele	OK	0.426318	6.62225	3.95732	2.36698	5e-05	0.000441468	yes
XLOC_001115	XLOC_001115		Zv9_scaffold3561:146458 151159	wt	ele	OK	0.596074	9.15952	3.94171	9.86491	5e-05	0.000441468	yes
XLOC_033002	XLOC_033002	zgc:114046	chr7:76828835 76837968	wt	ele	OK	0.395165	5.87158	3.89322	4.25787	5e-05	0.000441468	yes
XLOC_027305	XLOC_027305	b2m	chr4:11857919 11865853	wt	ele	OK	1.9009	28.0169	3.88154	7.02962	5e-05	0.000441468	yes
XLOC_035433	XLOC_035433		chr8:25150175 25430508	wt	ele	OK	0.70857	10.2936	3.86069	4.38239	5e-05	0.000441468	yes
XLOC_020821	XLOC_020821	elavl2	chr22:41211939 41233405	wt	ele	OK	0.195818	2.80609	3.84098	1.98738	5e-05	0.000441468	yes
XLOC_024127	XLOC_024127		chr25:9885031 9886621	wt	ele	OK	0.329918	4.60988	3.80455	5.54664	5e-05	0.000441468	yes
XLOC_031891	XLOC_031891	BX569793.1	chr6:49175541 49263085	wt	ele	OK	0.0837989	1.15508	3.78492	4.00901	5e-05	0.000441468	yes
XLOC_000215	XLOC_000215		Zv9_NA427:25577 32320	wt	ele	OK	0.164623	2.1355	3.69734	6.88779	5e-05	0.000441468	yes
XLOC_014354	XLOC_014354	CU896645.1	chr19:42523473 42563363	wt	ele	OK	2.86182	35.8192	3.64573	11.4249	5e-05	0.000441468	yes
XLOC_012098	XLOC_012098	EXD1	chr17:53898933 53903567	wt	ele	OK	0.48881	6.08267	3.63736	4.3898	5e-05	0.000441468	yes
XLOC_034317	XLOC_034317	suv39h1a	chr8:24248411 24258839	wt	ele	OK	0.570051	7.06117	3.63075	5.84138	5e-05	0.000441468	yes
XLOC_025601	XLOC_025601	si:dkey 106c17.2	chr3:38905811 38913591	wt	ele	OK	1.25431	15.42	3.61984	4.78352	5e-05	0.000441468	yes
XLOC_024560	XLOC_024560	cbx7a	chr3:25087411 25095881	wt	ele	OK	0.819032	10.0611	3.61872	8.09153	5e-05	0.000441468	yes
XLOC_028662	XLOC_028662		chr4:53967999 53970198	wt	ele	OK	0.182582	2.21149	3.5984	4.64918	5e-05	0.000441468	yes
XLOC_012833	XLOC_012833		chr18:1034779 1045870	wt	ele	OK	0.25583	2.99355	3.5486	6.6539	5e-05	0.000441468	yes
XLOC_030653	XLOC_030653		chr5:25749346 25753377	wt	ele	OK	0.0904735	1.04266	3.52663	4.40767	5e-05	0.000441468	yes
XLOC_034562	XLOC_034562	piwil1	chr8:45837726 45912215	wt	ele	OK	0.583879	6.61614	3.50225	2.30614	5e-05	0.000441468	yes
XLOC_033109	XLOC_033109	CR388152.1	chr7:6910808 7107173	wt	ele	OK	0.276949	3.13389	3.50027	3.95324	5e-05	0.000441468	yes
XLOC_028399	XLOC_028399	CABZ01069012.1	chr4:59121436 59157183	wt	ele	OK	0.299201	3.38072	3.49815	4.9879	5e-05	0.000441468	yes
XLOC_033802	XLOC_033802	zgc:171759	chr7:76850948 76852496	wt	ele	OK	0.551167	6.18402	3.48798	2.55876	5e-05	0.000441468	yes
XLOC_000052	XLOC_000052		Zv9_NA164:6585 7512	wt	ele	OK	0.506754	5.55502	3.45443	5.21274	5e-05	0.000441468	yes
XLOC_000301	XLOC_000301		Zv9_NA530:1451 9691	wt	ele	OK	2.84264	30.6104	3.42872	12.8505	5e-05	0.000441468	yes
XLOC_014130	XLOC_014130	si:ch211 204a13.1	chr19:17118438 17122242	wt	ele	OK	0.645439	6.91834	3.42207	6.83136	5e-05	0.000441468	yes
XLOC_000302	XLOC_000302		Zv9_NA530:10131 10678	wt	ele	OK	3.79597	40.1008	3.40109	9.56164	5e-05	0.000441468	yes
XLOC_025228	XLOC_025228	si:dkey 56d12.4	chr3:15047005 15048990	wt	ele	OK	0.827025	8.72521	3.39919	6.69743	5e-05	0.000441468	yes
XLOC_024966	XLOC_024966		chr3:61050109 61054531	wt	ele	OK	1.06711	11.2038	3.39221	7.31133	5e-05	0.000441468	yes
XLOC_010888	XLOC_010888	si:dkey 85k15.4	chr16:15720573 15730506	wt	ele	OK	0.250919	2.59402	3.3699	3.57233	5e-05	0.000441468	yes
XLOC_006690	XLOC_006690	fancl	chr13:26927786 27023227	wt	ele	OK	0.596869	6.14723	3.36445	4.12177	5e-05	0.000441468	yes
XLOC_000383	XLOC_000383		Zv9_NA668:12851 19440	wt	ele	OK	1.00106	10.2586	3.35724	10.822	5e-05	0.000441468	yes
XLOC_024043	XLOC_024043	ano9a	chr25:36213631 36243523	wt	ele	OK	0.819196	8.26892	3.33542	8.38465	5e-05	0.000441468	yes
XLOC_005097	XLOC_005097		chr11:31992081 31993942	wt	ele	OK	0.451417	4.33966	3.26505	5.65528	5e-05	0.000441468	yes
XLOC_008806	XLOC_008806		chr14:38758334 38760649	wt	ele	OK	0.178753	1.70836	3.25657	4.26942	5e-05	0.000441468	yes
XLOC_013093	XLOC_013093	si:dkeyp 84g1.3	chr18:25276566 25280306	wt	ele	OK	0.192029	1.80879	3.23563	3.43674	5e-05	0.000441468	yes
XLOC_021114	XLOC_021114	si:dkey 147f3.8	chr23:17059815 17088909	wt	ele	OK	7.94401	72.1806	3.18367	8.76359	5e-05	0.000441468	yes
XLOC_024069	XLOC_024069		chr25:37529564 37530866	wt	ele	OK	0.369746	3.29096	3.1539	4.44943	5e-05	0.000441468	yes
XLOC_023759	XLOC_023759		chr25:9888542 9892719	wt	ele	OK	0.291345	2.58172	3.14753	4.38728	5e-05	0.000441468	yes
XLOC_002416	XLOC_002416	cxcl c1c	chr1:49728562 49732289	wt	ele	OK	1.00595	8.79313	3.12781	6.21946	5e-05	0.000441468	yes
XLOC_001243	XLOC_001243		chr1:7669659 7673065	wt	ele	OK	0.291914	2.50826	3.10307	4.55068	5e-05	0.000441468	yes
XLOC_000518	XLOC_000518		Zv9_NA831:32 3835	wt	ele	OK	0.268909	2.27841	3.08284	4.37145	5e-05	0.000441468	yes
XLOC_029654	XLOC_029654		chr5:8049754 8062599	wt	ele	OK	0.313618	2.63922	3.07303	5.63835	5e-05	0.000441468	yes
XLOC_000195	XLOC_000195		Zv9_NA401:28383 32218	wt	ele	OK	4.13471	34.4026	3.05666	10.0345	5e-05	0.000441468	yes
XLOC_013232	XLOC_013232	si:ch211 132b12.1	chr18:38849689 38863045	wt	ele	OK	0.688405	5.63761	3.03376	4.64862	5e-05	0.000441468	yes
XLOC_017280	XLOC_017280	pla2g4a	chr20:34154396 34172204	wt	ele	OK	0.200664	1.63833	3.02937	3.47274	5e-05	0.000441468	yes
XLOC_025702	XLOC_025702		chr3:50351849 50543291	wt	ele	OK	1.87813	15.2085	3.01751	3.14477	5e-05	0.000441468	yes
XLOC_017652	XLOC_017652	si:busm1 180g5.7	chr20:9931532 9941260	wt	ele	OK	3.3629	27.0752	3.00919	5.50938	5e-05	0.000441468	yes
XLOC_008221	XLOC_008221	STAG3	chr14:213190 225470	wt	ele	OK	0.541066	4.33346	3.00165	4.08567	5e-05	0.000441468	yes
XLOC_006080	XLOC_006080	tdrd1	chr12:31921590 31935253	wt	ele	OK	0.17306	1.34919	2.96275	2.37761	5e-05	0.000441468	yes
XLOC_003957	XLOC_003957		chr10:45531680 45537639	wt	ele	OK	0.340162	2.63504	2.95353	6.24028	5e-05	0.000441468	yes
XLOC_008325	XLOC_008325	zgc:174917	chr14:11703544 11705974	wt	ele	OK	0.433221	3.35562	2.9534	4.61456	5e-05	0.000441468	yes
XLOC_005416	XLOC_005416	si:zfos 754c12.1	chr12:21845376 21853961	wt	ele	OK	0.254194	1.94596	2.93648	3.41235	5e-05	0.000441468	yes
XLOC_028490	XLOC_028490		chr4:18249289 18251565	wt	ele	OK	0.249199	1.89234	2.9248	4.26063	5e-05	0.000441468	yes
XLOC_031785	XLOC_031785	AL954698.1	chr6:39632405 39659085	wt	ele	OK	0.418973	3.17704	2.92275	6.04164	5e-05	0.000441468	yes
XLOC_019842	XLOC_019842	si:ch211 250k18.7	chr22:9224848 9254366	wt	ele	OK	0.250307	1.8944	2.91997	3.74831	5e-05	0.000441468	yes
XLOC_008736	XLOC_008736		chr14:13572383 13575280	wt	ele	OK	0.235898	1.76438	2.90293	4.53088	5e-05	0.000441468	yes
XLOC_028571	XLOC_028571		chr4:36409581 36410797	wt	ele	OK	1.10142	8.20032	2.89632	6.08255	5e-05	0.000441468	yes
XLOC_001054	XLOC_001054		Zv9_scaffold3538:63419 74798	wt	ele	OK	0.80095	5.95956	2.89542	8.45336	5e-05	0.000441468	yes
XLOC_036827	XLOC_036827		chr9:57914535 57915480	wt	ele	OK	0.684481	5.06951	2.88876	4.77974	5e-05	0.000441468	yes
XLOC_021640	XLOC_021640	si:dkey 178o8.2	chr23:14520741 14527203	wt	ele	OK	0.877542	6.36092	2.8577	5.67409	5e-05	0.000441468	yes
XLOC_021966	XLOC_021966		chr23:41516694 41534954	wt	ele	OK	0.232215	1.66856	2.84507	4.01981	5e-05	0.000441468	yes
XLOC_031691	XLOC_031691		chr6:29540036 29544975	wt	ele	OK	0.263721	1.87248	2.82786	4.07222	5e-05	0.000441468	yes
XLOC_002738	XLOC_002738		chr1:60127588 60128876	wt	ele	OK	1.89854	13.2567	2.80375	7.21183	5e-05	0.000441468	yes
XLOC_033266	XLOC_033266	BX324131.3	chr7:19764401 19769134	wt	ele	OK	3.46168	24.0896	2.79886	8.9795	5e-05	0.000441468	yes
XLOC_001910	XLOC_001910		chr1:60136228 60142706	wt	ele	OK	1.65706	11.5216	2.79765	6.47612	5e-05	0.000441468	yes
XLOC_028397	XLOC_028397		chr4:58941424 58949938	wt	ele	OK	1.90406	13.189	2.79218	5.88143	5e-05	0.000441468	yes
XLOC_001911	XLOC_001911		chr1:60142806 60153480	wt	ele	OK	2.01723	13.8762	2.78217	8.09308	5e-05	0.000441468	yes
XLOC_001909	XLOC_001909		chr1:60131249 60135744	wt	ele	OK	1.75295	12.0359	2.77949	6.2694	5e-05	0.000441468	yes
XLOC_008768	XLOC_008768		chr14:21222522 21225847	wt	ele	OK	0.267686	1.79889	2.74849	4.67385	5e-05	0.000441468	yes
XLOC_013935	XLOC_013935	CABZ01073740.1	chr19:1512457 1523206	wt	ele	OK	0.453996	3.02487	2.73612	5.27979	5e-05	0.000441468	yes
XLOC_027304	XLOC_027304	irak3	chr4:11846657 11855495	wt	ele	OK	0.225704	1.49999	2.73245	3.72734	5e-05	0.000441468	yes
XLOC_019619	XLOC_019619	def6b	chr22:958381 977500	wt	ele	OK	0.616152	4.0916	2.7313	2.57838	5e-05	0.000441468	yes
XLOC_017485	XLOC_017485	si:ch73 91k6.1	chr20:51744238 51748388	wt	ele	OK	0.27117	1.79971	2.7305	3.61075	5e-05	0.000441468	yes
XLOC_025107	XLOC_025107		chr3:5910838 5915106	wt	ele	OK	0.307383	2.03554	2.7273	4.54021	5e-05	0.000441468	yes
XLOC_018601	XLOC_018601	HABP4	chr21:19224719 19230567	wt	ele	OK	0.757836	4.9719	2.71384	4.1869	5e-05	0.000441468	yes
XLOC_010436	XLOC_010436	chtopb	chr16:31109316 31115241	wt	ele	OK	0.402541	2.6365	2.71142	3.7727	5e-05	0.000441468	yes
XLOC_003959	XLOC_003959		chr10:45540834 45543369	wt	ele	OK	0.43769	2.85422	2.70511	4.70059	5e-05	0.000441468	yes
XLOC_001043	XLOC_001043		Zv9_scaffold3536:197458 202654	wt	ele	OK	0.523682	3.41097	2.70342	4.0701	5e-05	0.000441468	yes
XLOC_010806	XLOC_010806	si:dkey 278k10.4 si:dkey 278k10.5	chr16:8905427 8915673	wt	ele	OK	0.36585	2.36643	2.69339	1.94905	5e-05	0.000441468	yes
XLOC_029024	XLOC_029024		chr5:30145150 30151677	wt	ele	OK	0.892723	5.75172	2.68771	6.02776	5e-05	0.000441468	yes
XLOC_029938	XLOC_029938	h2afx	chr5:32173723 32174335	wt	ele	OK	52.1816	331.597	2.66782	15.0158	5e-05	0.000441468	yes
XLOC_013836	XLOC_013836		chr18:19920792 19922915	wt	ele	OK	0.230275	1.45233	2.65694	3.6179	5e-05	0.000441468	yes
XLOC_025011	XLOC_025011	mhc1zaa	chr3:1106079 1128569	wt	ele	OK	1.12462	7.07339	2.65296	4.7667	5e-05	0.000441468	yes
XLOC_017923	XLOC_017923	si:dkey 30j22.5	chr20:35508677 35537540	wt	ele	OK	0.115934	0.728089	2.65082	3.24824	5e-05	0.000441468	yes
XLOC_013034	XLOC_013034	si:ch211 117i10.10	chr18:18786773 18822315	wt	ele	OK	2.50416	15.6419	2.64301	4.32032	5e-05	0.000441468	yes
XLOC_019304	XLOC_019304	zgc:152891	chr21:29958221 29989099	wt	ele	OK	0.262485	1.62471	2.62988	4.03033	5e-05	0.000441468	yes
XLOC_033349	XLOC_033349	BX511061.2	chr7:26007361 26029062	wt	ele	OK	1.17915	7.29822	2.6298	7.84464	5e-05	0.000441468	yes
XLOC_023182	XLOC_023182	prtgb	chr25:437260 481668	wt	ele	OK	0.806242	4.97567	2.62561	5.84674	5e-05	0.000441468	yes
XLOC_025639	XLOC_025639		chr3:41525817 41530436	wt	ele	OK	1.45693	8.97955	2.62371	3.75841	5e-05	0.000441468	yes
XLOC_027408	XLOC_027408		chr4:18244673 18249167	wt	ele	OK	0.414661	2.55169	2.62145	4.24359	5e-05	0.000441468	yes
XLOC_035846	XLOC_035846	rnf17	chr9:30581937 30604536	wt	ele	OK	0.473041	2.82564	2.57854	3.78114	5e-05	0.000441468	yes
XLOC_015377	XLOC_015377		chr2:13689730 13694512	wt	ele	OK	0.205652	1.22631	2.57605	3.3192	5e-05	0.000441468	yes
XLOC_009253	XLOC_009253		chr15:41946874 41950939	wt	ele	OK	1.07581	6.30907	2.55201	4.59808	5e-05	0.000441468	yes
XLOC_030010	XLOC_030010	si:dkey 204l11.1	chr5:37141313 37158880	wt	ele	OK	1.46324	8.47278	2.53367	6.62444	5e-05	0.000441468	yes
XLOC_009920	XLOC_009920		chr15:3632512 3634376	wt	ele	OK	0.474612	2.70796	2.51238	4.30677	5e-05	0.000441468	yes
XLOC_035839	XLOC_035839	si:dkey 253e1.1	chr9:29755383 29774232	wt	ele	OK	0.773182	4.37047	2.49891	2.44457	5e-05	0.000441468	yes
XLOC_011155	XLOC_011155	rspo1	chr16:36087311 36131543	wt	ele	OK	0.504062	2.8436	2.49604	5.12124	5e-05	0.000441468	yes
XLOC_029653	XLOC_029653	FP102192.1	chr5:8029839 8047084	wt	ele	OK	0.428789	2.415	2.49368	3.41898	5e-05	0.000441468	yes
XLOC_025841	XLOC_025841		chr3:4114776 4117664	wt	ele	OK	0.204063	1.11859	2.4546	3.49545	5e-05	0.000441468	yes
XLOC_001341	XLOC_001341	si:dkey 167i21.4	chr1:17571241 17574751	wt	ele	OK	0.447147	2.43834	2.44708	3.79889	5e-05	0.000441468	yes
XLOC_012903	XLOC_012903	si:dkey 238c7.12	chr18:7029381 7031332	wt	ele	OK	104.787	570.596	2.44501	14.7614	5e-05	0.000441468	yes
XLOC_025183	XLOC_025183	si:ch211 8c17.2 si:ch211 8c17.3 si:ch211 8c17.4	chr3:12414838 12438274	wt	ele	OK	0.680042	3.66336	2.42947	3.09011	5e-05	0.000441468	yes
XLOC_002616	XLOC_002616	VAV1	chr1:59781899 59786479	wt	ele	OK	0.992584	5.32426	2.42332	4.24305	5e-05	0.000441468	yes
XLOC_024062	XLOC_024062	slc7a10b	chr25:37303416 37319174	wt	ele	OK	0.697066	3.73814	2.42295	5.02556	5e-05	0.000441468	yes
XLOC_020663	XLOC_020663	si:dkey 270e21.7	chr22:25807789 25935032	wt	ele	OK	1.8098	9.54829	2.39941	4.70945	5e-05	0.000441468	yes
XLOC_008897	XLOC_008897	RNF14	chr15:3613363 3632405	wt	ele	OK	4.44377	23.3931	2.39623	6.9997	5e-05	0.000441468	yes
XLOC_035055	XLOC_035055	si:ch211 103n10.5	chr8:30566733 30567435	wt	ele	OK	1.5487	8.12868	2.39196	4.98986	5e-05	0.000441468	yes
XLOC_016710	XLOC_016710	si:dkey 264b2.3	chr2:60071067 60171903	wt	ele	OK	2.73466	14.3516	2.39178	4.96425	5e-05	0.000441468	yes
XLOC_011324	XLOC_011324	si:dkey 256h2.1	chr16:50574341 50592491	wt	ele	OK	0.706741	3.69036	2.38451	4.56253	5e-05	0.000441468	yes
XLOC_008765	XLOC_008765		chr14:20981779 20983591	wt	ele	OK	0.537699	2.80533	2.3833	4.09345	5e-05	0.000441468	yes
XLOC_028223	XLOC_028223	si:dkeyp 80d11.1	chr4:51617438 51655969	wt	ele	OK	0.763985	3.97345	2.37878	3.92615	5e-05	0.000441468	yes
XLOC_026471	XLOC_026471	zgc:174700	chr4:33881436 33888021	wt	ele	OK	0.304366	1.58087	2.37684	3.133	5e-05	0.000441468	yes
XLOC_020591	XLOC_020591	rxfp3.2b	chr22:20422300 20424439	wt	ele	OK	0.471307	2.44366	2.3743	3.59447	5e-05	0.000441468	yes
XLOC_014442	XLOC_014442	CU596012.1	chr19:49936945 49945482	wt	ele	OK	0.918117	4.75698	2.3733	4.03565	5e-05	0.000441468	yes
XLOC_013390	XLOC_013390	cplx3b	chr18:5067637 5086635	wt	ele	OK	3.10014	16.0567	2.37277	3.91651	5e-05	0.000441468	yes
XLOC_011867	XLOC_011867	ctsl.1	chr17:27315818 27320142	wt	ele	OK	1.11651	5.77017	2.36962	4.29892	5e-05	0.000441468	yes
XLOC_036395	XLOC_036395	tex30	chr9:28427025 28429985	wt	ele	OK	1.07336	5.50722	2.3592	3.42876	5e-05	0.000441468	yes
XLOC_033833	XLOC_033833		chr7:5569101 5576505	wt	ele	OK	0.23343	1.19644	2.35768	4.84854	5e-05	0.000441468	yes
XLOC_002737	XLOC_002737		chr1:60126609 60127485	wt	ele	OK	1.57031	7.97518	2.34446	5.0338	5e-05	0.000441468	yes
XLOC_000656	XLOC_000656		Zv9_NA933:902 3011	wt	ele	OK	2.41255	12.2223	2.34088	3.81614	5e-05	0.000441468	yes
XLOC_025602	XLOC_025602	si:dkey 106c17.1	chr3:38966482 38970137	wt	ele	OK	0.365335	1.84943	2.33979	3.61196	5e-05	0.000441468	yes
XLOC_026464	XLOC_026464	zgc:174700	chr4:33088436 33113260	wt	ele	OK	0.309719	1.5372	2.31128	3.47769	5e-05	0.000441468	yes
XLOC_025636	XLOC_025636	si:dkey 21n8.3	chr3:40953578 40960763	wt	ele	OK	0.414894	2.05057	2.30521	2.25684	5e-05	0.000441468	yes
XLOC_022270	XLOC_022270	dlgap1b	chr24:8835992 9071542	wt	ele	OK	1.05449	5.17472	2.29493	4.77417	5e-05	0.000441468	yes
XLOC_016840	XLOC_016840		chr2:53215546 53217440	wt	ele	OK	0.62848	3.08112	2.29351	4.10603	5e-05	0.000441468	yes
XLOC_009594	XLOC_009594	bbc3	chr15:23098764 23115128	wt	ele	OK	1.07483	5.25843	2.29053	6.3776	5e-05	0.000441468	yes
XLOC_006919	XLOC_006919	PRTG	chr13:52216808 52260664	wt	ele	OK	0.569124	2.76588	2.28092	5.47745	5e-05	0.000441468	yes
XLOC_020278	XLOC_020278	cdkn1a	chr22:577446 583142	wt	ele	OK	2.68043	12.9799	2.27575	5.30733	5e-05	0.000441468	yes
XLOC_014707	XLOC_014707	mir219 3	chr19:18441397 18445018	wt	ele	OK	0.720243	3.48055	2.27276	2.09447	5e-05	0.000441468	yes
XLOC_008080	XLOC_008080	zgc:63568	chr14:37113160 37121035	wt	ele	OK	1.25711	6.0418	2.26487	4.73327	5e-05	0.000441468	yes
XLOC_014777	XLOC_014777	si:ch211 196n4.9	chr19:24206530 24210245	wt	ele	OK	0.361397	1.73597	2.26409	3.39681	5e-05	0.000441468	yes
XLOC_001729	XLOC_001729	wu:fc75a09	chr1:53249322 53256921	wt	ele	OK	1.14896	5.48054	2.25399	6.33618	5e-05	0.000441468	yes
XLOC_021147	XLOC_021147	si:dkey 192i18.3	chr23:19212808 19217237	wt	ele	OK	0.602566	2.86295	2.24831	3.35518	5e-05	0.000441468	yes
XLOC_010445	XLOC_010445	ctssb.1	chr16:31769423 31773725	wt	ele	OK	3.90419	18.5391	2.24747	6.00412	5e-05	0.000441468	yes
XLOC_000837	XLOC_000837		Zv9_scaffold3470:117738 119707	wt	ele	OK	0.308679	1.46006	2.24185	3.2465	5e-05	0.000441468	yes
XLOC_011486	XLOC_011486		chr16:34870078 34872943	wt	ele	OK	0.343147	1.62308	2.24184	3.84578	5e-05	0.000441468	yes
XLOC_034512	XLOC_034512	si:ch211 215p11.3	chr8:40651724 40669253	wt	ele	OK	0.326619	1.53171	2.22946	4.05932	5e-05	0.000441468	yes
XLOC_026469	XLOC_026469	si:ch211 209j12.1	chr4:33761625 33789292	wt	ele	OK	1.40577	6.59241	2.22944	4.51497	5e-05	0.000441468	yes
XLOC_011034	XLOC_011034	bcl3	chr16:27940652 27978617	wt	ele	OK	0.263722	1.23524	2.2277	2.96011	5e-05	0.000441468	yes
XLOC_018920	XLOC_018920	irf1b	chr21:44267642 44273778	wt	ele	OK	0.689087	3.21268	2.22102	3.81476	5e-05	0.000441468	yes
XLOC_001908	XLOC_001908		chr1:60120959 60122589	wt	ele	OK	4.93215	22.8618	2.21265	6.98794	5e-05	0.000441468	yes
XLOC_001040	XLOC_001040		Zv9_scaffold3535:195641 248200	wt	ele	OK	0.241448	1.11516	2.20746	3.13401	5e-05	0.000441468	yes
XLOC_000920	XLOC_000920		Zv9_scaffold3491:3 4216	wt	ele	OK	0.374697	1.72746	2.20486	4.27572	5e-05	0.000441468	yes
XLOC_008766	XLOC_008766		chr14:20987184 20988589	wt	ele	OK	0.751726	3.45693	2.20121	3.96432	5e-05	0.000441468	yes
XLOC_007625	XLOC_007625		chr13:52260773 52266638	wt	ele	OK	0.601156	2.75779	2.1977	5.74854	5e-05	0.000441468	yes
XLOC_016503	XLOC_016503	oc90	chr2:43043669 43061471	wt	ele	OK	1.76152	7.88736	2.16272	4.16741	5e-05	0.000441468	yes
XLOC_023821	XLOC_023821	cpa2 cpa4	chr25:16939078 16958160	wt	ele	OK	0.780263	3.48944	2.16096	3.38088	5e-05	0.000441468	yes
XLOC_016777	XLOC_016777		chr2:27694881 27697301	wt	ele	OK	0.270125	1.20752	2.16035	3.19715	5e-05	0.000441468	yes
XLOC_008318	XLOC_008318	si:dkey 92i17.2	chr14:10806071 10816622	wt	ele	OK	3.5674	15.8869	2.15489	5.9039	5e-05	0.000441468	yes
XLOC_021332	XLOC_021332	GTSF1L	chr23:32339780 32346187	wt	ele	OK	6.69279	29.7504	2.15223	6.43132	5e-05	0.000441468	yes
XLOC_020408	XLOC_020408		chr22:7665585 7689712	wt	ele	OK	0.959695	4.25665	2.14907	3.34273	5e-05	0.000441468	yes
XLOC_032119	XLOC_032119		chr6:56245016 56248854	wt	ele	OK	0.311204	1.38027	2.14901	3.89711	5e-05	0.000441468	yes
XLOC_018934	XLOC_018934	CABZ01072037.1	chr21:120583 124634	wt	ele	OK	0.677728	3.00363	2.14793	3.47136	5e-05	0.000441468	yes
XLOC_011189	XLOC_011189	CABZ01053617.1	chr16:39970096 39977567	wt	ele	OK	0.352656	1.552	2.13779	2.40265	5e-05	0.000441468	yes
XLOC_030059	XLOC_030059	prkg2	chr5:41284328 41308300	wt	ele	OK	0.473843	2.04086	2.1067	4.16776	5e-05	0.000441468	yes
XLOC_020377	XLOC_020377	zgc:113298	chr22:6262609 6290925	wt	ele	OK	0.788102	3.37104	2.09674	3.49906	5e-05	0.000441468	yes
XLOC_033141	XLOC_033141		chr7:8679987 8690282	wt	ele	OK	0.918391	3.87957	2.07872	2.74033	5e-05	0.000441468	yes
XLOC_006999	XLOC_006999	dnph1	chr13:3872912 3878539	wt	ele	OK	4.54421	19.1555	2.07565	4.32819	5e-05	0.000441468	yes
XLOC_022579	XLOC_022579	scospondin	chr24:41589847 41751706	wt	ele	OK	0.34472	1.44741	2.06997	3.72846	5e-05	0.000441468	yes
XLOC_020912	XLOC_020912		chr22:25791293 25798889	wt	ele	OK	0.183193	0.765292	2.06265	3.83665	5e-05	0.000441468	yes
XLOC_023246	XLOC_023246	ENSDARG00000089390	chr25:5132497 5143203	wt	ele	OK	0.820923	3.42208	2.05955	5.14284	5e-05	0.000441468	yes
XLOC_022048	XLOC_022048	tgm1l4	chr23:46354747 46366940	wt	ele	OK	1.57476	6.46292	2.03706	4.91986	5e-05	0.000441468	yes
XLOC_024541	XLOC_024541	prr15la	chr3:24462121 24488530	wt	ele	OK	1.70014	6.94949	2.03125	3.50559	5e-05	0.000441468	yes
XLOC_015239	XLOC_015239	MCOLN3	chr2:1760765 1788872	wt	ele	OK	1.21686	4.94728	2.02347	4.37754	5e-05	0.000441468	yes
XLOC_028591	XLOC_028591		chr4:41270559 41275950	wt	ele	OK	0.482414	1.9611	2.02332	4.74249	5e-05	0.000441468	yes
XLOC_019149	XLOC_019149	si:ch211 22d5.2	chr21:19545149 19567053	wt	ele	OK	8.41789	34.2037	2.02262	6.96335	5e-05	0.000441468	yes
XLOC_027464	XLOC_027464	si:ch211 244b2.4	chr4:25183271 25208049	wt	ele	OK	0.65149	2.64127	2.01941	3.46355	5e-05	0.000441468	yes
XLOC_034966	XLOC_034966	si:ch211 196c10.6	chr8:23988624 23990240	wt	ele	OK	3.62149	14.525	2.00388	5.09143	5e-05	0.000441468	yes
XLOC_010720	XLOC_010720	ENSDARG00000088726	chr16:58012841 58025985	wt	ele	OK	5.02927	20.1109	1.99955	3.62507	5e-05	0.000441468	yes
XLOC_008037	XLOC_008037		chr14:33670710 33671914	wt	ele	OK	0.918469	3.62228	1.97959	3.3359	5e-05	0.000441468	yes
XLOC_024269	XLOC_024269	CR589947.1	chr3:4070351 4087936	wt	ele	OK	0.489756	1.92622	1.97563	2.93029	5e-05	0.000441468	yes
XLOC_011388	XLOC_011388	CABZ01080435.1	chr16:58124671 58140053	wt	ele	OK	4.60409	18.0874	1.974	5.5157	5e-05	0.000441468	yes
XLOC_002575	XLOC_002575	si:dkey 156m2.3	chr1:58307307 58323929	wt	ele	OK	0.338097	1.31637	1.96105	4.32674	5e-05	0.000441468	yes
XLOC_001042	XLOC_001042		Zv9_scaffold3535:172615 176095	wt	ele	OK	0.3437	1.33637	1.9591	3.47077	5e-05	0.000441468	yes
XLOC_025310	XLOC_025310	tcap	chr3:21453654 21455521	wt	ele	OK	1.3444	5.22521	1.95853	4.00989	5e-05	0.000441468	yes
XLOC_027355	XLOC_027355		chr4:15362746 15378319	wt	ele	OK	0.371169	1.44045	1.95638	2.79649	5e-05	0.000441468	yes
XLOC_005994	XLOC_005994	hbbe3	chr12:21691905 21693036	wt	ele	OK	478.578	1857.11	1.95624	11.3473	5e-05	0.000441468	yes
XLOC_029928	XLOC_029928	bco2a	chr5:31693426 31719321	wt	ele	OK	0.967289	3.7224	1.94421	3.2754	5e-05	0.000441468	yes
XLOC_010659	XLOC_010659	tap1	chr16:52012758 52042248	wt	ele	OK	0.489257	1.8708	1.93499	3.47024	5e-05	0.000441468	yes
XLOC_034092	XLOC_034092	CIT	chr8:3987037 4122402	wt	ele	OK	0.292372	1.11654	1.93316	3.59677	5e-05	0.000441468	yes
XLOC_020698	XLOC_020698		chr22:28694697 28708409	wt	ele	OK	0.962652	3.67409	1.9323	3.14725	5e-05	0.000441468	yes
XLOC_020155	XLOC_020155	TRIM14	chr22:32681508 32690497	wt	ele	OK	7.1515	27.2678	1.93088	5.33227	5e-05	0.000441468	yes
XLOC_006674	XLOC_006674	gsto1	chr13:25604321 25612941	wt	ele	OK	0.843206	3.18988	1.91955	3.19995	5e-05	0.000441468	yes
XLOC_016904	XLOC_016904		chr2:59480730 59484647	wt	ele	OK	0.680583	2.54518	1.90293	4.50957	5e-05	0.000441468	yes
XLOC_000088	XLOC_000088		Zv9_NA240:1797 28150	wt	ele	OK	0.762584	2.83685	1.89532	3.84245	5e-05	0.000441468	yes
XLOC_019837	XLOC_019837	si:ch211 213a13.11	chr22:8999940 9035490	wt	ele	OK	0.228015	0.846094	1.89169	2.72865	5e-05	0.000441468	yes
XLOC_011594	XLOC_011594	zgc:136872	chr17:2784828 2939580	wt	ele	OK	0.503169	1.86153	1.88737	2.33558	5e-05	0.000441468	yes
XLOC_001448	XLOC_001448	zic2b	chr1:28776998 28806135	wt	ele	OK	7.34121	27.0872	1.88352	7.01487	5e-05	0.000441468	yes
XLOC_017032	XLOC_017032	si:ch211 155o21.3	chr20:11912839 11917972	wt	ele	OK	2.1392	7.81279	1.86877	2.45205	5e-05	0.000441468	yes
XLOC_015374	XLOC_015374	wdr65	chr2:13254293 13472513	wt	ele	OK	0.664008	2.42043	1.86599	2.20576	5e-05	0.000441468	yes
XLOC_015003	XLOC_015003	si:ch211 199g17.2	chr19:44979719 45003866	wt	ele	OK	0.888439	3.22421	1.8596	2.43459	5e-05	0.000441468	yes
XLOC_027063	XLOC_027063	CABZ01083834.1	chr4:59645301 59717767	wt	ele	OK	0.559092	2.02874	1.85943	3.24417	5e-05	0.000441468	yes
XLOC_002376	XLOC_002376	zgc:111983	chr1:45628898 45632879	wt	ele	OK	3.65771	13.2237	1.85412	4.63092	5e-05	0.000441468	yes
XLOC_021661	XLOC_021661	dnmt3	chr23:17154080 17175808	wt	ele	OK	6.35849	22.8292	1.84413	6.71169	5e-05	0.000441468	yes
XLOC_004954	XLOC_004954	her2	chr11:43073538 43077202	wt	ele	OK	9.86626	35.3168	1.83978	6.88184	5e-05	0.000441468	yes
XLOC_034336	XLOC_034336	mmp9	chr8:25134454 25148890	wt	ele	OK	3.24092	11.5278	1.83064	5.8104	5e-05	0.000441468	yes
XLOC_009816	XLOC_009816	si:ch211 181d7.3	chr15:41270040 41288879	wt	ele	OK	0.583565	2.07324	1.82892	4.27356	5e-05	0.000441468	yes
XLOC_001807	XLOC_001807	c3c	chr1:56821383 56867340	wt	ele	OK	1.00852	3.54793	1.81474	5.26935	5e-05	0.000441468	yes
XLOC_006969	XLOC_006969	olig3	chr13:1177251 1180015	wt	ele	OK	4.71944	16.5491	1.81006	3.77648	5e-05	0.000441468	yes
XLOC_019956	XLOC_019956	frem1b	chr22:17339661 17413701	wt	ele	OK	2.78175	9.73618	1.80736	7.07732	5e-05	0.000441468	yes
XLOC_016479	XLOC_016479	CR848728.2	chr2:41720883 41787554	wt	ele	OK	1.76102	6.11824	1.7967	4.76982	5e-05	0.000441468	yes
XLOC_034607	XLOC_034607	CR855877.1	chr8:49885905 49910849	wt	ele	OK	0.521028	1.80675	1.79396	3.78843	5e-05	0.000441468	yes
XLOC_033772	XLOC_033772	CU929396.1	chr7:75095754 75104612	wt	ele	OK	0.672119	2.32731	1.79187	3.36112	5e-05	0.000441468	yes
XLOC_011720	XLOC_011720	efcab11	chr17:16264959 16374308	wt	ele	OK	1.59737	5.49003	1.78112	3.473	5e-05	0.000441468	yes
XLOC_012430	XLOC_012430		chr17:29183656 29195207	wt	ele	OK	0.517872	1.77871	1.78016	3.18979	5e-05	0.000441468	yes
XLOC_032028	XLOC_032028		chr6:16867535 16870197	wt	ele	OK	0.997947	3.42292	1.77819	3.47265	5e-05	0.000441468	yes
XLOC_007654	XLOC_007654		chr14:181465 182278	wt	ele	OK	4.95041	16.9347	1.77437	5.31227	5e-05	0.000441468	yes
XLOC_030946	XLOC_030946	iqca1	chr6:15662217 15811221	wt	ele	OK	0.885256	3.02642	1.77344	3.35233	5e-05	0.000441468	yes
XLOC_003838	XLOC_003838		chr10:44087987 44097301	wt	ele	OK	0.374481	1.27874	1.77175	4.19471	5e-05	0.000441468	yes
XLOC_007073	XLOC_007073	si:ch211 219o4.2	chr13:9640530 9684131	wt	ele	OK	0.733728	2.48601	1.76052	2.81147	5e-05	0.000441468	yes
XLOC_009335	XLOC_009335	ALOX5	chr15:576473 645426	wt	ele	OK	1.8424	6.21428	1.754	2.98539	5e-05	0.000441468	yes
XLOC_002392	XLOC_002392	ebpl	chr1:47156554 47161104	wt	ele	OK	1.15666	3.89698	1.75239	2.75935	5e-05	0.000441468	yes
XLOC_021135	XLOC_021135	chia.4 chia.6	chr23:18096996 18164381	wt	ele	OK	0.929068	3.12797	1.75137	2.16013	5e-05	0.000441468	yes
XLOC_009580	XLOC_009580	ccdc153	chr15:22551436 22560143	wt	ele	OK	1.37926	4.63599	1.74898	2.41441	5e-05	0.000441468	yes
XLOC_034249	XLOC_034249	DMBX1	chr8:21026339 21029797	wt	ele	OK	3.45349	11.5943	1.74729	5.64837	5e-05	0.000441468	yes
XLOC_012477	XLOC_012477	ECT2L	chr17:33595377 33613804	wt	ele	OK	0.916799	3.0556	1.73678	3.84008	5e-05	0.000441468	yes
XLOC_026588	XLOC_026588	CR356223.3	chr4:40665439 40668194	wt	ele	OK	2.79897	9.32466	1.73615	4.06265	5e-05	0.000441468	yes
XLOC_021108	XLOC_021108	zgc:153722	chr23:16945306 16958948	wt	ele	OK	0.903167	3.00346	1.73356	3.28998	5e-05	0.000441468	yes
XLOC_008515	XLOC_008515		chr14:32938964 32959262	wt	ele	OK	1.25144	4.15266	1.73045	6.22465	5e-05	0.000441468	yes
XLOC_008189	XLOC_008189	atoh1b	chr14:51971417 51973818	wt	ele	OK	4.86608	16.1288	1.7288	4.15364	5e-05	0.000441468	yes
XLOC_004775	XLOC_004775	optc	chr11:24136957 24153781	wt	ele	OK	2.90518	9.52723	1.71343	4.14728	5e-05	0.000441468	yes
XLOC_018383	XLOC_018383	fech	chr21:1970693 1997082	wt	ele	OK	1.40958	4.6175	1.71185	3.32657	5e-05	0.000441468	yes
XLOC_019861	XLOC_019861	blf	chr22:10027156 10033842	wt	ele	OK	2.47341	8.07922	1.70772	4.53265	5e-05	0.000441468	yes
XLOC_016524	XLOC_016524	mpz	chr2:44320982 44344572	wt	ele	OK	0.871782	2.82997	1.69875	2.29279	5e-05	0.000441468	yes
XLOC_001397	XLOC_001397	mnd1	chr1:24035505 24073635	wt	ele	OK	11.6361	37.7601	1.69825	5.76871	5e-05	0.000441468	yes
XLOC_034421	XLOC_034421	upb1	chr8:31547470 31590275	wt	ele	OK	5.51474	17.8929	1.69802	3.12471	5e-05	0.000441468	yes
XLOC_030680	XLOC_030680		chr5:44148641 44157495	wt	ele	OK	0.637616	2.06414	1.69478	4.83547	5e-05	0.000441468	yes
XLOC_001451	XLOC_001451	si:ch73 115f13.1	chr1:29062084 29066924	wt	ele	OK	4.19143	13.4845	1.68579	3.94467	5e-05	0.000441468	yes
XLOC_033528	XLOC_033528		chr7:42269266 42278461	wt	ele	OK	0.933716	2.99867	1.68327	5.16845	5e-05	0.000441468	yes
XLOC_013312	XLOC_013312	si:ch211 136a13.2	chr18:48045293 48066302	wt	ele	OK	1.49939	4.80702	1.68077	3.01544	5e-05	0.000441468	yes
XLOC_021990	XLOC_021990	cyp2aa11 cyp2aa7	chr23:42957987 42980371	wt	ele	OK	5.78828	18.5327	1.67886	5.31396	5e-05	0.000441468	yes
XLOC_014420	XLOC_014420		chr19:48406345 48408029	wt	ele	OK	1.5981	5.10613	1.67587	3.72671	5e-05	0.000441468	yes
XLOC_031519	XLOC_031519	gulp1b	chr6:11407044 11525302	wt	ele	OK	1.21782	3.87797	1.671	3.24665	5e-05	0.000441468	yes
XLOC_010923	XLOC_010923	5S_rRNA iffo1b si:dkey 260g12.1	chr16:19163803 19224742	wt	ele	OK	4.66297	14.8082	1.66707	5.54661	5e-05	0.000441468	yes
XLOC_020362	XLOC_020362	si:rp71 36a1.2	chr22:5845329 5863778	wt	ele	OK	1.27136	4.02912	1.6641	3.42327	5e-05	0.000441468	yes
XLOC_036182	XLOC_036182	si:dkeyp 118h3.7	chr9:6557733 6589855	wt	ele	OK	1.25875	3.98876	1.66395	2.7582	5e-05	0.000441468	yes
XLOC_030502	XLOC_030502	mat2ab	chr5:72057069 72072448	wt	ele	OK	8.25552	26.1493	1.66334	4.74943	5e-05	0.000441468	yes
XLOC_019550	XLOC_019550		chr21:32531948 32532507	wt	ele	OK	3.91482	12.3675	1.65953	4.22334	5e-05	0.000441468	yes
XLOC_023566	XLOC_023566		chr25:35083494 35094450	wt	ele	OK	0.778775	2.45624	1.65717	3.00422	5e-05	0.000441468	yes
XLOC_007657	XLOC_007657	hs3st1	chr14:242033 246627	wt	ele	OK	0.698763	2.20309	1.65666	2.56951	5e-05	0.000441468	yes
XLOC_033319	XLOC_033319		chr7:24135541 24148729	wt	ele	OK	0.986588	3.10176	1.65257	3.87575	5e-05	0.000441468	yes
XLOC_005168	XLOC_005168	dnah9	chr12:227104 250246	wt	ele	OK	0.548591	1.71044	1.64057	2.44468	5e-05	0.000441468	yes
XLOC_016871	XLOC_016871		chr2:56638829 56641281	wt	ele	OK	0.538487	1.67826	1.63999	3.0376	5e-05	0.000441468	yes
XLOC_015773	XLOC_015773	pask	chr2:44573848 44607369	wt	ele	OK	2.51292	7.83122	1.63987	5.54435	5e-05	0.000441468	yes
XLOC_020258	XLOC_020258	CABZ01094378.1	chr22:77 4766	wt	ele	OK	3.81834	11.8272	1.63109	4.71421	5e-05	0.000441468	yes
XLOC_007660	XLOC_007660		chr14:317380 319037	wt	ele	OK	5.56388	17.2307	1.63081	5.12636	5e-05	0.000441468	yes
XLOC_007238	XLOC_007238	wnt8b	chr13:30214652 30230644	wt	ele	OK	0.906469	2.802	1.62813	3.90716	5e-05	0.000441468	yes
XLOC_013400	XLOC_013400	ppp6r2b	chr18:5894599 5942176	wt	ele	OK	6.51259	20.127	1.62783	3.68113	5e-05	0.000441468	yes
XLOC_011923	XLOC_011923	SNAP23	chr17:33639323 33646778	wt	ele	OK	4.02245	12.4081	1.62514	3.62314	5e-05	0.000441468	yes
XLOC_015195	XLOC_015195		chr19:47706745 47708431	wt	ele	OK	1.81475	5.59487	1.62433	4.14031	5e-05	0.000441468	yes
XLOC_010317	XLOC_010317	skap2	chr16:23016318 23062746	wt	ele	OK	2.00361	6.12754	1.61271	3.49402	5e-05	0.000441468	yes
XLOC_018322	XLOC_018322		chr20:51523786 51532374	wt	ele	OK	0.353254	1.07795	1.60951	3.84535	5e-05	0.000441468	yes
XLOC_024298	XLOC_024298	TRIM35	chr3:5968925 5981171	wt	ele	OK	0.95485	2.91232	1.60882	3.1032	5e-05	0.000441468	yes
XLOC_016988	XLOC_016988	CYP46A1 cyp46a1	chr20:5148222 5185993	wt	ele	OK	1.29806	3.95902	1.60879	3.51851	5e-05	0.000441468	yes
XLOC_028964	XLOC_028964	tp53	chr5:25755161 25766740	wt	ele	OK	51.4856	156.883	1.60745	6.29776	5e-05	0.000441468	yes
XLOC_031637	XLOC_031637	BX936371.1	chr6:23267188 23269528	wt	ele	OK	2.15207	6.55594	1.60708	4.70902	5e-05	0.000441468	yes
XLOC_024004	XLOC_024004	rps27.2	chr25:34827001 34835684	wt	ele	OK	53.7368	163.01	1.60098	5.84189	5e-05	0.000441468	yes
XLOC_011112	XLOC_011112	si:dkey 97i18.5	chr16:33930174 33932357	wt	ele	OK	7.47289	22.6677	1.6009	4.82561	5e-05	0.000441468	yes
XLOC_019834	XLOC_019834	si:ch211 213a13.1	chr22:8919184 8935574	wt	ele	OK	2.5739	7.78648	1.59702	4.71193	5e-05	0.000441468	yes
XLOC_036531	XLOC_036531	si:dkey 184d2.3	chr9:37797843 37799128	wt	ele	OK	64.5994	195.066	1.59437	8.6592	5e-05	0.000441468	yes
XLOC_025252	XLOC_025252	ENSDARG00000073998	chr3:16092599 16127547	wt	ele	OK	0.745137	2.248	1.59306	3.20815	5e-05	0.000441468	yes
XLOC_023551	XLOC_023551	duox	chr25:32936630 32997395	wt	ele	OK	0.380296	1.1458	1.59116	3.15152	5e-05	0.000441468	yes
XLOC_010919	XLOC_010919	CR848045.1 si:dkey 8k3.2	chr16:18718924 18756463	wt	ele	OK	2.95999	8.91052	1.58992	3.75559	5e-05	0.000441468	yes
XLOC_008066	XLOC_008066	pttg1	chr14:35688888 35691689	wt	ele	OK	2.69575	8.09821	1.58692	3.04491	5e-05	0.000441468	yes
XLOC_000453	XLOC_000453		Zv9_NA735:109128 118219	wt	ele	OK	8.63227	25.8262	1.58102	5.00388	5e-05	0.000441468	yes
XLOC_035801	XLOC_035801	CT030712.1	chr9:25734334 25744892	wt	ele	OK	2.52806	7.55416	1.57924	4.33429	5e-05	0.000441468	yes
XLOC_011496	XLOC_011496		chr16:37970159 37980500	wt	ele	OK	0.420233	1.25321	1.57637	4.20579	5e-05	0.000441468	yes
XLOC_019832	XLOC_019832	si:dkey 182g1.6	chr22:8799584 8833314	wt	ele	OK	0.864545	2.57367	1.57381	3.14493	5e-05	0.000441468	yes
XLOC_019181	XLOC_019181	GDPD4	chr21:21262734 21277115	wt	ele	OK	3.13503	9.30862	1.57009	4.35141	5e-05	0.000441468	yes
XLOC_007072	XLOC_007072		chr13:9624396 9636537	wt	ele	OK	0.362342	1.07577	1.56994	3.90009	5e-05	0.000441468	yes
XLOC_020918	XLOC_020918		chr22:28709727 28712088	wt	ele	OK	0.74832	2.22134	1.5697	3.19423	5e-05	0.000441468	yes
XLOC_030907	XLOC_030907	col5a2b	chr6:11349918 11406978	wt	ele	OK	1.49273	4.43017	1.56941	4.81215	5e-05	0.000441468	yes
XLOC_030921	XLOC_030921	casp8	chr6:12957804 12968646	wt	ele	OK	2.85648	8.46728	1.56766	4.83197	5e-05	0.000441468	yes
XLOC_012871	XLOC_012871	cyp1a	chr18:4974675 4985566	wt	ele	OK	17.7218	52.3587	1.56291	6.93202	5e-05	0.000441468	yes
XLOC_017249	XLOC_017249	si:ch211 279m15.1	chr20:31454726 31770383	wt	ele	OK	15.4808	45.6492	1.56011	3.34792	5e-05	0.000441468	yes
XLOC_004800	XLOC_004800	gata1a	chr11:26344429 26352415	wt	ele	OK	1.28892	3.79226	1.5569	2.91924	5e-05	0.000441468	yes
XLOC_034232	XLOC_034232	MPEG1	chr8:19881016 19884779	wt	ele	OK	0.853604	2.50683	1.55423	3.45078	5e-05	0.000441468	yes
XLOC_005006	XLOC_005006	CABZ01112732.1	chr11:46330375 46336046	wt	ele	OK	0.469456	1.36828	1.5433	2.63986	5e-05	0.000441468	yes
XLOC_032912	XLOC_032912	gcshb	chr7:69505086 69517069	wt	ele	OK	7.26488	21.1724	1.54317	4.56434	5e-05	0.000441468	yes
XLOC_032308	XLOC_032308		chr7:8679987 8690282	wt	ele	OK	7.77771	22.6409	1.54151	5.68026	5e-05	0.000441468	yes
XLOC_022460	XLOC_022460	BX927314.1	chr24:30522347 30524684	wt	ele	OK	1.19142	3.4673	1.54113	3.61812	5e-05	0.000441468	yes
XLOC_004366	XLOC_004366	CU928222.1	chr11:37318301 37330604	wt	ele	OK	5.84917	17.0139	1.54041	4.89758	5e-05	0.000441468	yes
XLOC_011988	XLOC_011988	zgc:66313	chr17:43910264 43933718	wt	ele	OK	1.87914	5.461	1.53909	2.62229	5e-05	0.000441468	yes
XLOC_024754	XLOC_024754	C3H17orf53	chr3:37785132 37801065	wt	ele	OK	1.11735	3.24638	1.53875	3.56647	5e-05	0.000441468	yes
XLOC_004641	XLOC_004641	cdc6	chr11:11904846 11914072	wt	ele	OK	11.9614	34.745	1.53842	6.61421	5e-05	0.000441468	yes
XLOC_005421	XLOC_005421	arsg	chr12:21914106 21952866	wt	ele	OK	3.40066	9.85975	1.53574	2.3252	5e-05	0.000441468	yes
XLOC_008485	XLOC_008485	fosl1a	chr14:31609131 31617315	wt	ele	OK	0.739687	2.14053	1.53298	2.71453	5e-05	0.000441468	yes
XLOC_013788	XLOC_013788		chr18:254974 258112	wt	ele	OK	0.728242	2.10707	1.53275	3.34492	5e-05	0.000441468	yes
XLOC_020398	XLOC_020398	fgfr1bl	chr22:6907970 6915772	wt	ele	OK	1.67323	4.78644	1.51632	2.46204	5e-05	0.000441468	yes
XLOC_022879	XLOC_022879	si:dkey 25o1.2	chr24:28340350 28344025	wt	ele	OK	8.41653	24.063	1.51552	5.26496	5e-05	0.000441468	yes
XLOC_011804	XLOC_011804	slc16a12a	chr17:23408142 23433042	wt	ele	OK	0.736226	2.10449	1.51525	3.49654	5e-05	0.000441468	yes
XLOC_031050	XLOC_031050	BX470083.4	chr6:24747146 24752211	wt	ele	OK	0.940579	2.68288	1.51216	3.10056	5e-05	0.000441468	yes
XLOC_033279	XLOC_033279	dock11	chr7:20390820 20543478	wt	ele	OK	6.36369	18.1363	1.51095	5.06112	5e-05	0.000441468	yes
XLOC_011475	XLOC_011475		chr16:28089051 28093463	wt	ele	OK	1.50093	4.26971	1.50828	4.24216	5e-05	0.000441468	yes
XLOC_005677	XLOC_005677	tbata	chr12:49159825 49181723	wt	ele	OK	1.46715	4.16715	1.50605	2.65365	5e-05	0.000441468	yes
XLOC_010979	XLOC_010979	si:dkey 71b5.9	chr16:24136194 24197706	wt	ele	OK	5.07701	14.4122	1.50524	3.46881	5e-05	0.000441468	yes
XLOC_006329	XLOC_006329		chr12:33278756 33281902	wt	ele	OK	0.934436	2.64344	1.50025	3.3825	5e-05	0.000441468	yes
XLOC_031110	XLOC_031110		chr6:31738407 31751276	wt	ele	OK	2.21498	6.21439	1.48832	2.67164	5e-05	0.000441468	yes
XLOC_026541	XLOC_026541	si:dkey 238o14.8	chr4:37646710 37650410	wt	ele	OK	0.881661	2.47241	1.48762	2.68299	5e-05	0.000441468	yes
XLOC_002382	XLOC_002382	atf7ip	chr1:46040744 46087163	wt	ele	OK	59.2386	166.01	1.48666	4.9174	5e-05	0.000441468	yes
XLOC_028510	XLOC_028510		chr4:28028454 28035583	wt	ele	OK	0.3281	0.919244	1.48631	3.15995	5e-05	0.000441468	yes
XLOC_022630	XLOC_022630		chr24:3076739 3079916	wt	ele	OK	1.36498	3.82237	1.48559	3.24803	5e-05	0.000441468	yes
XLOC_016032	XLOC_016032	wnt3a	chr2:3593637 3653039	wt	ele	OK	1.58971	4.44388	1.48305	3.2608	5e-05	0.000441468	yes
XLOC_011852	XLOC_011852		chr17:26385734 26396831	wt	ele	OK	0.623871	1.74217	1.48157	3.0906	5e-05	0.000441468	yes
XLOC_021809	XLOC_021809	wnt10b	chr23:27880592 27888543	wt	ele	OK	1.97984	5.51038	1.47677	3.46347	5e-05	0.000441468	yes
XLOC_032121	XLOC_032121		chr6:56251326 56253859	wt	ele	OK	0.710806	1.97747	1.47613	2.99699	5e-05	0.000441468	yes
XLOC_029471	XLOC_029471	GLDC	chr5:69157958 69203134	wt	ele	OK	4.39082	12.1928	1.47346	4.73911	5e-05	0.000441468	yes
XLOC_026566	XLOC_026566	ZNF70	chr4:39096271 39123080	wt	ele	OK	4.03678	11.2037	1.4727	4.46498	5e-05	0.000441468	yes
XLOC_015795	XLOC_015795	si:ch211 66k16.28	chr2:45535180 45544824	wt	ele	OK	0.353985	0.981162	1.4708	2.67455	5e-05	0.000441468	yes
XLOC_032967	XLOC_032967	tyms	chr7:75222915 75229200	wt	ele	OK	28.5493	79.0999	1.47022	7.03628	5e-05	0.000441468	yes
XLOC_011629	XLOC_011629	CR925758.1	chr17:6431367 6475535	wt	ele	OK	0.80655	2.23193	1.46846	3.31715	5e-05	0.000441468	yes
XLOC_004873	XLOC_004873	dnah1	chr11:35478545 35534429	wt	ele	OK	0.339111	0.937215	1.46662	3.27343	5e-05	0.000441468	yes
XLOC_020168	XLOC_020168	BX537350.1	chr22:33693623 33726369	wt	ele	OK	1.18082	3.26154	1.46576	2.91485	5e-05	0.000441468	yes
XLOC_019151	XLOC_019151	c6	chr21:19598935 19760521	wt	ele	OK	5.82137	16.0517	1.46329	3.108	5e-05	0.000441468	yes
XLOC_014682	XLOC_014682	stmn1a	chr19:16640048 16642794	wt	ele	OK	124.007	341.56	1.46172	6.21878	5e-05	0.000441468	yes
XLOC_000780	XLOC_000780		Zv9_scaffold3459:258996 261608	wt	ele	OK	1.97627	5.43036	1.45827	4.22614	5e-05	0.000441468	yes
XLOC_019836	XLOC_019836	si:ch211 213a13.2	chr22:8947106 8997674	wt	ele	OK	0.27564	0.754792	1.45329	3.09053	5e-05	0.000441468	yes
XLOC_024536	XLOC_024536	hoxb1a	chr3:24060138 24062383	wt	ele	OK	1.50949	4.13212	1.45282	3.32199	5e-05	0.000441468	yes
XLOC_007215	XLOC_007215	ddx43	chr13:27556545 27577948	wt	ele	OK	4.59632	12.5575	1.45	4.66586	5e-05	0.000441468	yes
XLOC_011950	XLOC_011950	slc25a21	chr17:38197844 38400539	wt	ele	OK	2.51115	6.85866	1.44958	3.86907	5e-05	0.000441468	yes
XLOC_020441	XLOC_020441	si:dkey 286j17.4	chr22:9742982 9846200	wt	ele	OK	0.970753	2.64517	1.44619	3.94113	5e-05	0.000441468	yes
XLOC_007123	XLOC_007123	ikzf1	chr13:15911856 15948530	wt	ele	OK	0.848776	2.31226	1.44585	2.51841	5e-05	0.000441468	yes
XLOC_015467	XLOC_015467	ca8	chr2:21651558 21675050	wt	ele	OK	3.05723	8.32497	1.44522	3.77478	5e-05	0.000441468	yes
XLOC_025641	XLOC_025641	grifin	chr3:41780642 41785960	wt	ele	OK	6.28659	17.1136	1.44479	4.57853	5e-05	0.000441468	yes
XLOC_017041	XLOC_017041	dtl	chr20:13056127 13089969	wt	ele	OK	6.49355	17.671	1.44431	5.3094	5e-05	0.000441468	yes
XLOC_028545	XLOC_028545		chr4:32093660 32095079	wt	ele	OK	3.17017	8.61632	1.44251	4.14666	5e-05	0.000441468	yes
XLOC_025142	XLOC_025142	ZNF337	chr3:7787160 7812713	wt	ele	OK	0.937184	2.5449	1.4412	2.99576	5e-05	0.000441468	yes
XLOC_026393	XLOC_026393	CR388132.1	chr4:28472176 28489528	wt	ele	OK	2.96597	8.03609	1.43799	3.84114	5e-05	0.000441468	yes
XLOC_002132	XLOC_002132	ncapd3	chr1:20323104 20345692	wt	ele	OK	10.803	29.2626	1.43762	6.049	5e-05	0.000441468	yes
XLOC_011558	XLOC_011558		chr16:58508066 58523757	wt	ele	OK	1.67476	4.53512	1.43719	3.13915	5e-05	0.000441468	yes
XLOC_012357	XLOC_012357	exo1	chr17:22395144 22403386	wt	ele	OK	4.73057	12.7896	1.43488	4.43653	5e-05	0.000441468	yes
XLOC_006471	XLOC_006471	mcph1	chr13:6213584 6251263	wt	ele	OK	2.35596	6.35071	1.4306	3.57133	5e-05	0.000441468	yes
XLOC_025367	XLOC_025367	si:dkeyp 69e1.9	chr3:26954706 26958613	wt	ele	OK	4.32534	11.6418	1.42843	4.09183	5e-05	0.000441468	yes
XLOC_023176	XLOC_023176		chr25:238142 241045	wt	ele	OK	32.192	86.5926	1.42754	5.44095	5e-05	0.000441468	yes
XLOC_009021	XLOC_009021	HSPA8	chr15:18550703 18566760	wt	ele	OK	2.4456	6.57524	1.42685	2.5759	5e-05	0.000441468	yes
XLOC_015671	XLOC_015671	ing5b	chr2:36326834 36329580	wt	ele	OK	6.67546	17.8621	1.41996	4.21609	5e-05	0.000441468	yes
XLOC_021505	XLOC_021505	ednrab	chr23:46043928 46055806	wt	ele	OK	0.976081	2.61125	1.41967	2.3794	5e-05	0.000441468	yes
XLOC_007213	XLOC_007213	vrk2	chr13:26927786 27023227	wt	ele	OK	3.45234	9.2181	1.41689	3.60721	5e-05	0.000441468	yes
XLOC_009531	XLOC_009531	ZBTB16	chr15:17197112 17306767	wt	ele	OK	1.77168	4.72446	1.41503	3.93369	5e-05	0.000441468	yes
XLOC_011884	XLOC_011884	greb1	chr17:30428311 30476890	wt	ele	OK	3.32034	8.84284	1.41318	4.4387	5e-05	0.000441468	yes
XLOC_024540	XLOC_024540		chr3:24412953 24437610	wt	ele	OK	4.87277	12.9582	1.41105	5.40798	5e-05	0.000441468	yes
XLOC_024926	XLOC_024926	notum1a	chr3:58762770 58800457	wt	ele	OK	4.53101	12.0447	1.4105	3.43697	5e-05	0.000441468	yes
XLOC_014037	XLOC_014037	cks1b	chr19:8457560 8460768	wt	ele	OK	16.7048	44.4021	1.41037	6.16904	5e-05	0.000441468	yes
XLOC_032889	XLOC_032889	tpcn2	chr7:66330350 66378445	wt	ele	OK	2.41373	6.39434	1.40553	4.08834	5e-05	0.000441468	yes
XLOC_026097	XLOC_026097	mapk12b	chr4:5396938 5403690	wt	ele	OK	2.23768	5.90597	1.40017	3.20967	5e-05	0.000441468	yes
XLOC_025733	XLOC_025733	col5a3a	chr3:54421658 54614912	wt	ele	OK	0.809406	2.1346	1.39903	3.79353	5e-05	0.000441468	yes
XLOC_002303	XLOC_002303	dctd	chr1:40175764 40221985	wt	ele	OK	5.91938	15.5742	1.39564	4.299	5e-05	0.000441468	yes
XLOC_020419	XLOC_020419		chr22:8111050 8287661	wt	ele	OK	4.8027	12.5943	1.39085	3.18057	5e-05	0.000441468	yes
XLOC_001532	XLOC_001532	si:ch211 76m11.11	chr1:37578887 37622900	wt	ele	OK	1.2606	3.30256	1.38947	2.52238	5e-05	0.000441468	yes
XLOC_017351	XLOC_017351	esco2	chr20:39369597 39383863	wt	ele	OK	22.0264	57.6666	1.38851	6.40486	5e-05	0.000441468	yes
XLOC_008032	XLOC_008032	zic6	chr14:32887238 32927847	wt	ele	OK	4.94926	12.9325	1.38571	3.71258	5e-05	0.000441468	yes
XLOC_024884	XLOC_024884	col5a3a	chr3:54697354 54769855	wt	ele	OK	0.448216	1.17034	1.38467	2.78246	5e-05	0.000441468	yes
XLOC_005876	XLOC_005876	adam8b	chr12:9851164 9886884	wt	ele	OK	0.936314	2.43984	1.38172	2.85134	5e-05	0.000441468	yes
XLOC_002904	XLOC_002904	swi5	chr10:10694765 10703146	wt	ele	OK	4.38755	11.4173	1.37973	3.76308	5e-05	0.000441468	yes
XLOC_001915	XLOC_001915	rdh8b	chr1:60269730 60279318	wt	ele	OK	1.32649	3.44576	1.37721	3.28489	5e-05	0.000441468	yes
XLOC_014116	XLOC_014116	lin28a	chr19:14873055 14904641	wt	ele	OK	6.02325	15.6454	1.37713	2.84292	5e-05	0.000441468	yes
XLOC_029243	XLOC_029243	ctsla	chr5:46423372 46429502	wt	ele	OK	342.632	889.107	1.3757	4.85962	5e-05	0.000441468	yes
XLOC_003120	XLOC_003120	si:ch211 222e20.4	chr10:29109635 29113590	wt	ele	OK	1.57513	4.08124	1.37354	2.79608	5e-05	0.000441468	yes
XLOC_011137	XLOC_011137	mms22l	chr16:34595901 34619811	wt	ele	OK	3.98202	10.3093	1.37238	3.48204	5e-05	0.000441468	yes
XLOC_003626	XLOC_003626	mir21 1	chr10:28879998 28880879	wt	ele	OK	4.55921	11.7902	1.37073	3.02916	5e-05	0.000441468	yes
XLOC_023294	XLOC_023294	fanci	chr25:8655591 8721295	wt	ele	OK	3.73084	9.55259	1.35639	4.03167	5e-05	0.000441468	yes
XLOC_026078	XLOC_026078	SLC13A4	chr4:4676859 4799529	wt	ele	OK	11.5893	29.6411	1.35481	3.08436	5e-05	0.000441468	yes
XLOC_023818	XLOC_023818	CR376785.2	chr25:16825082 16909141	wt	ele	OK	2.19724	5.61805	1.35438	3.433	5e-05	0.000441468	yes
XLOC_034405	XLOC_034405	atoh1a	chr8:30442027 30443657	wt	ele	OK	3.82841	9.78398	1.35368	4.30135	5e-05	0.000441468	yes
XLOC_010193	XLOC_010193	ECM1	chr16:11307945 11319401	wt	ele	OK	3.59013	9.14909	1.34959	3.76823	5e-05	0.000441468	yes
XLOC_036484	XLOC_036484	mxc	chr9:33838838 33851885	wt	ele	OK	1.13838	2.89948	1.34882	3.0519	5e-05	0.000441468	yes
XLOC_013936	XLOC_013936	CABZ01073736.1	chr19:1525562 1571258	wt	ele	OK	0.392864	0.999996	1.34789	2.49767	5e-05	0.000441468	yes
XLOC_032432	XLOC_032432	mus81	chr7:21008520 21037862	wt	ele	OK	6.52241	16.5937	1.34716	4.40208	5e-05	0.000441468	yes
XLOC_028368	XLOC_028368	ZNF70	chr4:57882911 57891694	wt	ele	OK	1.07377	2.72348	1.34277	2.70885	5e-05	0.000441468	yes
XLOC_025990	XLOC_025990		chr3:60520424 60521917	wt	ele	OK	1.74446	4.41401	1.33931	3.13499	5e-05	0.000441468	yes
XLOC_023090	XLOC_023090		chr24:16840894 16847417	wt	ele	OK	0.328446	0.829593	1.33674	2.78333	5e-05	0.000441468	yes
XLOC_027594	XLOC_027594	si:dkey 81i14.3	chr4:31804927 31810564	wt	ele	OK	1.0447	2.62875	1.33129	2.9637	5e-05	0.000441468	yes
XLOC_016308	XLOC_016308	urod	chr2:27699368 27724068	wt	ele	OK	14.8458	37.324	1.33004	3.22251	5e-05	0.000441468	yes
XLOC_030391	XLOC_030391	rad51d	chr5:62553317 62566216	wt	ele	OK	2.16082	5.42942	1.32922	2.88645	5e-05	0.000441468	yes
XLOC_032424	XLOC_032424		chr7:20709974 20716451	wt	ele	OK	14.3329	36.0052	1.32888	6.01051	5e-05	0.000441468	yes
XLOC_010677	XLOC_010677		chr16:54501791 54538335	wt	ele	OK	1.07578	2.69971	1.32742	2.95208	5e-05	0.000441468	yes
XLOC_019831	XLOC_019831	si:dkey 182g1.2	chr22:8774599 8795033	wt	ele	OK	2.76448	6.9302	1.32589	3.14407	5e-05	0.000441468	yes
XLOC_008085	XLOC_008085	neil3	chr14:37635214 37648796	wt	ele	OK	6.88909	17.2642	1.3254	4.31093	5e-05	0.000441468	yes
XLOC_014431	XLOC_014431	rrm2	chr19:49363392 49368575	wt	ele	OK	44.3991	111.255	1.32527	5.71591	5e-05	0.000441468	yes
XLOC_026998	XLOC_026998	si:dkey 149m13.4 zgc:173710	chr4:55576682 55623038	wt	ele	OK	2.9126	7.29798	1.32519	3.49771	5e-05	0.000441468	yes
XLOC_013100	XLOC_013100	blm	chr18:26215694 26396395	wt	ele	OK	4.96311	12.4276	1.32423	4.65694	5e-05	0.000441468	yes
XLOC_008420	XLOC_008420	HNRNPUL2	chr14:23481737 23498569	wt	ele	OK	3.75857	9.40991	1.324	4.32411	5e-05	0.000441468	yes
XLOC_005074	XLOC_005074		chr11:15687079 15690208	wt	ele	OK	0.990828	2.47796	1.32245	3.00843	5e-05	0.000441468	yes
XLOC_009572	XLOC_009572	zgc:162608	chr15:20822247 20839638	wt	ele	OK	8.5983	21.5004	1.32224	2.73342	5e-05	0.000441468	yes
XLOC_034659	XLOC_034659	gins4	chr8:54694258 54710346	wt	ele	OK	8.15978	20.2863	1.31391	2.71717	5e-05	0.000441468	yes
XLOC_032457	XLOC_032457	AL935046.1	chr7:22489813 22794849	wt	ele	OK	0.500472	1.24373	1.31331	3.83624	5e-05	0.000441468	yes
XLOC_009640	XLOC_009640	brip1	chr15:26765058 26871694	wt	ele	OK	4.12949	10.2363	1.30965	3.52381	5e-05	0.000441468	yes
XLOC_013369	XLOC_013369	si:dkey 81n9.2	chr18:4246641 4250783	wt	ele	OK	2.23104	5.52676	1.30872	3.28114	5e-05	0.000441468	yes
XLOC_020476	XLOC_020476	sass6	chr22:10846058 10862635	wt	ele	OK	2.36079	5.83799	1.3062	4.02488	5e-05	0.000441468	yes
XLOC_036443	XLOC_036443	chaf1b	chr9:31576421 31589033	wt	ele	OK	10.4228	25.7676	1.30581	5.25794	5e-05	0.000441468	yes
XLOC_031238	XLOC_031238	APITD1	chr6:45871907 45874184	wt	ele	OK	6.44603	15.9032	1.30284	4.28621	5e-05	0.000441468	yes
XLOC_027298	XLOC_027298	arhgef39	chr4:11477726 11541752	wt	ele	OK	3.82928	9.44678	1.30275	3.65183	5e-05	0.000441468	yes
XLOC_024119	XLOC_024119		chr25:5069554 5071259	wt	ele	OK	2.05406	5.05875	1.3003	3.38855	5e-05	0.000441468	yes
XLOC_035768	XLOC_035768	tnfaip6	chr9:23797579 23813158	wt	ele	OK	2.77051	6.81938	1.29949	3.4638	5e-05	0.000441468	yes
XLOC_009588	XLOC_009588	hmbsb	chr15:22864924 22895692	wt	ele	OK	11.8877	29.152	1.29413	4.3806	5e-05	0.000441468	yes
XLOC_014563	XLOC_014563	tcf19l	chr19:7453822 7466518	wt	ele	OK	1.40809	3.45257	1.29393	3.86143	5e-05	0.000441468	yes
XLOC_022683	XLOC_022683	elovl2	chr24:8660761 8688086	wt	ele	OK	0.919442	2.24122	1.28545	3.20181	5e-05	0.000441468	yes
XLOC_003758	XLOC_003758	mmp30	chr10:40051609 40071814	wt	ele	OK	6.9915	16.9955	1.28148	4.74884	5e-05	0.000441468	yes
XLOC_034412	XLOC_034412	fancc	chr8:30960661 31006382	wt	ele	OK	2.04827	4.97665	1.28077	2.97294	5e-05	0.000441468	yes
XLOC_002409	XLOC_002409	mhc1zba	chr1:47652530 47659103	wt	ele	OK	5.19544	12.6095	1.2792	4.75218	5e-05	0.000441468	yes
XLOC_022761	XLOC_022761	zgc:112332	chr24:18997212 19016169	wt	ele	OK	4.09877	9.9457	1.27888	3.1201	5e-05	0.000441468	yes
XLOC_022983	XLOC_022983	metrn	chr24:39444648 39459007	wt	ele	OK	19.0632	46.1244	1.27474	5.86359	5e-05	0.000441468	yes
XLOC_034702	XLOC_034702	znf367	chr8:1279022 1288619	wt	ele	OK	7.31697	17.6778	1.27262	3.87651	5e-05	0.000441468	yes
XLOC_020626	XLOC_020626	chaf1a	chr22:22638356 22665386	wt	ele	OK	34.2135	82.5891	1.27138	5.39865	5e-05	0.000441468	yes
XLOC_017544	XLOC_017544	zgc:174972	chr20:17258 37643	wt	ele	OK	0.993036	2.39506	1.27014	2.34553	5e-05	0.000441468	yes
XLOC_025737	XLOC_025737	dnmt1	chr3:55442889 55458870	wt	ele	OK	33.6316	80.9309	1.26688	4.69114	5e-05	0.000441468	yes
XLOC_006640	XLOC_006640	dna2	chr13:22961919 22979979	wt	ele	OK	4.73622	11.3868	1.26556	4.91249	5e-05	0.000441468	yes
XLOC_020353	XLOC_020353	PGBD4	chr22:5641319 5648374	wt	ele	OK	1.56395	3.75965	1.2654	3.22467	5e-05	0.000441468	yes
XLOC_020364	XLOC_020364	CU468041.1	chr22:5948658 5979143	wt	ele	OK	2.6823	6.44659	1.26506	3.43087	5e-05	0.000441468	yes
XLOC_024123	XLOC_024123		chr25:7322702 7324474	wt	ele	OK	1.24939	2.99786	1.26271	2.75395	5e-05	0.000441468	yes
XLOC_034351	XLOC_034351	zgc:173994	chr8:26152011 26154745	wt	ele	OK	2.64807	6.35153	1.26216	3.48867	5e-05	0.000441468	yes
XLOC_018490	XLOC_018490	agxt2	chr21:9082001 9111144	wt	ele	OK	4.76553	11.4129	1.25996	3.76375	5e-05	0.000441468	yes
XLOC_020259	XLOC_020259		chr22:5653 9079	wt	ele	OK	5.76837	13.8085	1.25932	4.02934	5e-05	0.000441468	yes
XLOC_000515	XLOC_000515		Zv9_NA827:10224 13419	wt	ele	OK	0.971478	2.32391	1.2583	3.02339	5e-05	0.000441468	yes
XLOC_024901	XLOC_024901	BX088708.1	chr3:56418580 56583147	wt	ele	OK	4.02858	9.62881	1.25709	3.25601	5e-05	0.000441468	yes
XLOC_017089	XLOC_017089	fam167ab	chr20:18812677 18829604	wt	ele	OK	1.46874	3.50989	1.25685	3.11127	5e-05	0.000441468	yes
XLOC_000941	XLOC_000941		Zv9_scaffold3498:212977 215126	wt	ele	OK	1.76553	4.2067	1.25259	3.27444	5e-05	0.000441468	yes
XLOC_021698	XLOC_021698	ebp	chr23:19436446 19441928	wt	ele	OK	3.70963	8.83588	1.2521	3.05195	5e-05	0.000441468	yes
XLOC_021673	XLOC_021673	pm20d1.1 pm20d1.2	chr23:18164508 18202761	wt	ele	OK	1.62264	3.86354	1.25158	2.56866	5e-05	0.000441468	yes
XLOC_001429	XLOC_001429	cbsa	chr1:27999244 28024172	wt	ele	OK	1.43356	3.4084	1.24949	2.67289	5e-05	0.000441468	yes
XLOC_021218	XLOC_021218	plekhn1	chr23:23526277 23547122	wt	ele	OK	2.28981	5.43132	1.24608	3.04861	5e-05	0.000441468	yes
XLOC_004566	XLOC_004566	ccl25b	chr11:6296248 6300315	wt	ele	OK	17.5052	41.5107	1.2457	4.30192	5e-05	0.000441468	yes
XLOC_019460	XLOC_019460		chr21:44155412 44160867	wt	ele	OK	4.59467	10.8821	1.24392	3.55187	5e-05	0.000441468	yes
XLOC_031861	XLOC_031861	epha2	chr6:45811778 45846547	wt	ele	OK	10.7036	25.3238	1.2424	5.02688	5e-05	0.000441468	yes
XLOC_035862	XLOC_035862	zgc:113314	chr9:31454796 31460425	wt	ele	OK	3.92627	9.28488	1.24172	3.26812	5e-05	0.000441468	yes
XLOC_035668	XLOC_035668	si:ch211 67e16.2	chr9:14272449 14282105	wt	ele	OK	2.89415	6.84156	1.24119	2.73456	5e-05	0.000441468	yes
XLOC_014366	XLOC_014366	pogza	chr19:43953385 43976762	wt	ele	OK	3.97651	9.39382	1.24021	4.88403	5e-05	0.000441468	yes
XLOC_033209	XLOC_033209	e2f8	chr7:17351484 17373461	wt	ele	OK	12.8167	30.2614	1.23945	4.21974	5e-05	0.000441468	yes
XLOC_023701	XLOC_023701	fads2	chr25:4189904 4205135	wt	ele	OK	2.58949	6.11078	1.23869	3.03227	5e-05	0.000441468	yes
XLOC_010566	XLOC_010566	ccne2	chr16:43241773 43250825	wt	ele	OK	17.309	40.8415	1.23851	5.14582	5e-05	0.000441468	yes
XLOC_024925	XLOC_024925	stra13	chr3:58639825 58643911	wt	ele	OK	17.5624	41.2497	1.2319	3.47666	5e-05	0.000441468	yes
XLOC_011878	XLOC_011878		chr17:28881510 28890949	wt	ele	OK	0.646087	1.51643	1.23088	3.02633	5e-05	0.000441468	yes
XLOC_024562	XLOC_024562	ENSDARG00000009313	chr3:25222422 25234511	wt	ele	OK	5.1628	12.0966	1.22837	4.04501	5e-05	0.000441468	yes
XLOC_030479	XLOC_030479	unga	chr5:70347705 70362252	wt	ele	OK	10.0264	23.4145	1.22359	4.00434	5e-05	0.000441468	yes
XLOC_017969	XLOC_017969	clu	chr20:39285087 39298696	wt	ele	OK	7.74792	18.0926	1.22352	3.41218	5e-05	0.000441468	yes
XLOC_026686	XLOC_026686	si:dkey 43f9.4	chr4:46575194 46817878	wt	ele	OK	4.06814	9.49934	1.22346	2.40772	5e-05	0.000441468	yes
XLOC_018650	XLOC_018650	chek1	chr21:21673130 21680885	wt	ele	OK	11.8432	27.4561	1.21306	4.27814	5e-05	0.000441468	yes
XLOC_032507	XLOC_032507	haus3 poln	chr7:25558029 25620844	wt	ele	OK	6.85605	15.8173	1.20606	4.27724	5e-05	0.000441468	yes
XLOC_023785	XLOC_023785	gins3	chr25:13831992 13835680	wt	ele	OK	8.34665	19.2441	1.20515	4.27386	5e-05	0.000441468	yes
XLOC_022444	XLOC_022444	CR376848.1 nceh1b	chr24:27757677 27772951	wt	ele	OK	1.50995	3.47984	1.20452	2.58755	5e-05	0.000441468	yes
XLOC_035243	XLOC_035243	si:ch211 163b2.4	chr8:46529216 46536116	wt	ele	OK	2.87775	6.63048	1.20417	3.36945	5e-05	0.000441468	yes
XLOC_017512	XLOC_017512	dio3b	chr20:54157671 54165789	wt	ele	OK	1.14837	2.6426	1.20237	2.89847	5e-05	0.000441468	yes
XLOC_029690	XLOC_029690	chek2	chr5:10954244 10989846	wt	ele	OK	3.93932	9.05939	1.20147	3.00869	5e-05	0.000441468	yes
XLOC_023638	XLOC_023638	FANCA	chr25:38456031 38470483	wt	ele	OK	2.71049	6.22298	1.19905	3.90514	5e-05	0.000441468	yes
XLOC_024986	XLOC_024986	noxo1a	chr3:62820102 62831176	wt	ele	OK	2.39915	5.50198	1.19743	3.37184	5e-05	0.000441468	yes
XLOC_009826	XLOC_009826	ctsc	chr15:42362039 42383557	wt	ele	OK	6.15689	14.1192	1.19739	4.84342	5e-05	0.000441468	yes
XLOC_034119	XLOC_034119	gpd1a	chr8:7602675 7622142	wt	ele	OK	6.7459	15.466	1.19701	3.61867	5e-05	0.000441468	yes
XLOC_009611	XLOC_009611	EXO5	chr15:24437849 24447815	wt	ele	OK	2.28305	5.22531	1.19456	2.61031	5e-05	0.000441468	yes
XLOC_021021	XLOC_021021	ube2t	chr23:5244700 5248066	wt	ele	OK	13.494	30.8054	1.19086	4.84106	5e-05	0.000441468	yes
XLOC_028787	XLOC_028787	slc1a3a	chr5:8132017 8249687	wt	ele	OK	20.8806	47.583	1.18829	4.77688	5e-05	0.000441468	yes
XLOC_015352	XLOC_015352	gadd45aa	chr2:10071949 10075877	wt	ele	OK	3.83487	8.73406	1.18748	3.48858	5e-05	0.000441468	yes
XLOC_012947	XLOC_012947		chr18:12611331 12635297	wt	ele	OK	1.13426	2.5759	1.18332	3.04536	5e-05	0.000441468	yes
XLOC_004845	XLOC_004845	cflara	chr11:31207924 31216810	wt	ele	OK	2.39059	5.41254	1.17894	2.95747	5e-05	0.000441468	yes
XLOC_017633	XLOC_017633	ENSDARG00000039682	chr20:7245361 7255198	wt	ele	OK	21.7395	49.0745	1.17466	2.63375	5e-05	0.000441468	yes
XLOC_014503	XLOC_014503	RECQL4	chr19:3230779 3327110	wt	ele	OK	2.4057	5.4252	1.17322	3.00071	5e-05	0.000441468	yes
XLOC_009681	XLOC_009681	lgals9l1 zgc:92326	chr15:30329806 30365148	wt	ele	OK	3.63839	8.18502	1.16969	3.46163	5e-05	0.000441468	yes
XLOC_002799	XLOC_002799	ERAP1	chr10:2926133 2948580	wt	ele	OK	1.24898	2.80703	1.1683	2.72178	5e-05	0.000441468	yes
XLOC_027217	XLOC_027217	mcm10	chr4:7031280 7049883	wt	ele	OK	4.15705	9.34074	1.16798	3.95183	5e-05	0.000441468	yes
XLOC_002456	XLOC_002456	junba	chr1:52226931 52228476	wt	ele	OK	3.83459	8.61354	1.16753	2.83706	5e-05	0.000441468	yes
XLOC_012569	XLOC_012569	tmem206	chr17:45546423 45554650	wt	ele	OK	3.30005	7.40844	1.16668	3.15911	5e-05	0.000441468	yes
XLOC_012962	XLOC_012962	wfdc1	chr18:14181239 14203777	wt	ele	OK	8.85013	19.8576	1.16592	4.52112	5e-05	0.000441468	yes
XLOC_026258	XLOC_026258	ncaph2	chr4:17510114 17520422	wt	ele	OK	10.3894	23.2386	1.1614	4.55978	5e-05	0.000441468	yes
XLOC_018757	XLOC_018757	zgc:110224	chr21:29484786 29505906	wt	ele	OK	2.53273	5.66398	1.16112	3.36738	5e-05	0.000441468	yes
XLOC_029006	XLOC_029006	hdr	chr5:29049082 29060730	wt	ele	OK	5.77538	12.8755	1.15664	3.46352	5e-05	0.000441468	yes
XLOC_032516	XLOC_032516	krcp	chr7:26048762 26055725	wt	ele	OK	21.6352	48.2062	1.15584	5.35061	5e-05	0.000441468	yes
XLOC_016531	XLOC_016531	ncapd2	chr2:44811403 44839093	wt	ele	OK	29.24	65.1413	1.15563	4.73988	5e-05	0.000441468	yes
XLOC_027157	XLOC_027157	e2f7	chr4:2401850 2416468	wt	ele	OK	5.81794	12.9587	1.15535	4.20047	5e-05	0.000441468	yes
XLOC_028843	XLOC_028843	pole	chr5:13945797 14007252	wt	ele	OK	6.7112	14.9436	1.15489	4.93832	5e-05	0.000441468	yes
XLOC_032818	XLOC_032818	cdt1	chr7:56781781 56803068	wt	ele	OK	6.18761	13.7582	1.15284	3.20783	5e-05	0.000441468	yes
XLOC_003815	XLOC_003815	pcna	chr10:42187908 42192762	wt	ele	OK	328.153	728.818	1.15119	4.95729	5e-05	0.000441468	yes
XLOC_025237	XLOC_025237	mvp	chr3:15290374 15339124	wt	ele	OK	19.887	44.0191	1.14631	4.0974	5e-05	0.000441468	yes
XLOC_020884	XLOC_020884		chr22:5946608 5948567	wt	ele	OK	2.0797	4.60199	1.14588	3.07095	5e-05	0.000441468	yes
XLOC_012865	XLOC_012865	dut	chr18:4729029 4735630	wt	ele	OK	107.048	236.815	1.1455	4.91478	5e-05	0.000441468	yes
XLOC_030989	XLOC_030989	trim25	chr6:19509768 19522258	wt	ele	OK	2.15031	4.75024	1.14346	2.14931	5e-05	0.000441468	yes
XLOC_015367	XLOC_015367	greb1l	chr2:11527102 11624584	wt	ele	OK	3.04799	6.7303	1.14281	3.16168	5e-05	0.000441468	yes
XLOC_012410	XLOC_012410	E2F2	chr17:27084115 27107678	wt	ele	OK	7.7518	17.1145	1.14262	4.55975	5e-05	0.000441468	yes
XLOC_023243	XLOC_023243	lcat	chr25:5055715 5069468	wt	ele	OK	4.11774	9.09083	1.14256	2.73711	5e-05	0.000441468	yes
XLOC_005897	XLOC_005897	MKI67	chr12:11445702 11460368	wt	ele	OK	71.0981	156.91	1.14206	4.23772	5e-05	0.000441468	yes
XLOC_011603	XLOC_011603	MCM8	chr17:4092748 4132653	wt	ele	OK	2.15504	4.75269	1.14103	3.18214	5e-05	0.000441468	yes
XLOC_012310	XLOC_012310	cyp26c1	chr17:19353008 19365481	wt	ele	OK	6.72817	14.8359	1.1408	4.81492	5e-05	0.000441468	yes
XLOC_021270	XLOC_021270	wnt1	chr23:27892333 27901771	wt	ele	OK	1.96112	4.32237	1.14015	2.43364	5e-05	0.000441468	yes
XLOC_032459	XLOC_032459	tmem88b	chr7:22955935 22974931	wt	ele	OK	7.62149	16.7909	1.13954	3.48025	5e-05	0.000441468	yes
XLOC_023412	XLOC_023412	sh3gl3b	chr25:20012968 20026403	wt	ele	OK	2.99376	6.58759	1.13779	2.54908	5e-05	0.000441468	yes
XLOC_023799	XLOC_023799	nav2b	chr25:14771449 14930303	wt	ele	OK	5.82588	12.8092	1.13664	4.13088	5e-05	0.000441468	yes
XLOC_013402	XLOC_013402	si:dkey 266m15.6	chr18:5984221 6068246	wt	ele	OK	3.61648	7.94758	1.13593	4.42667	5e-05	0.000441468	yes
XLOC_013395	XLOC_013395	ddx11	chr18:5565807 5620454	wt	ele	OK	2.29405	5.04024	1.13559	2.90316	5e-05	0.000441468	yes
XLOC_013417	XLOC_013417	si:dkey 30c15.10 si:dkey 30c15.9	chr18:6890457 6911431	wt	ele	OK	12.0875	26.5487	1.13513	2.7154	5e-05	0.000441468	yes
XLOC_004596	XLOC_004596	eltd1	chr11:7529197 7557492	wt	ele	OK	1.43121	3.12955	1.12872	2.62605	5e-05	0.000441468	yes
XLOC_027596	XLOC_027596	BX324003.1	chr4:31941328 32042427	wt	ele	OK	2.15912	4.71345	1.12634	3.08994	5e-05	0.000441468	yes
XLOC_005589	XLOC_005589	birc5a	chr12:36887883 36893786	wt	ele	OK	18.4827	40.3406	1.12606	4.48974	5e-05	0.000441468	yes
XLOC_012076	XLOC_012076	odc1	chr17:52270217 52283861	wt	ele	OK	51.5287	112.422	1.12548	4.85682	5e-05	0.000441468	yes
XLOC_001365	XLOC_001365	PRIMPOL	chr1:20345962 20355665	wt	ele	OK	9.1446	19.91	1.1225	4.1487	5e-05	0.000441468	yes
XLOC_021583	XLOC_021583	phlda3	chr23:5806308 5809109	wt	ele	OK	5.50162	11.965	1.1209	3.82336	5e-05	0.000441468	yes
XLOC_014501	XLOC_014501	CDCA7L	chr19:2992291 3005973	wt	ele	OK	20.7772	45.1392	1.11938	4.43063	5e-05	0.000441468	yes
XLOC_008268	XLOC_008268	kazald2	chr14:5811096 5823208	wt	ele	OK	4.68581	10.1676	1.11761	3.0606	5e-05	0.000441468	yes
XLOC_022399	XLOC_022399	pola1	chr24:24445466 24540473	wt	ele	OK	12.8085	27.7507	1.11542	4.22258	5e-05	0.000441468	yes
XLOC_031890	XLOC_031890	ngf	chr6:49110019 49156545	wt	ele	OK	3.1295	6.77782	1.11489	2.52441	5e-05	0.000441468	yes
XLOC_034899	XLOC_034899	mutyh	chr8:18723279 18731334	wt	ele	OK	3.87383	8.37877	1.11298	3.27229	5e-05	0.000441468	yes
XLOC_009825	XLOC_009825	rab38a	chr15:42326196 42361200	wt	ele	OK	5.40209	11.6823	1.11274	2.62792	5e-05	0.000441468	yes
XLOC_004493	XLOC_004493	nuf2	chr11:416540 425283	wt	ele	OK	21.4754	46.3918	1.11118	4.46123	5e-05	0.000441468	yes
XLOC_019333	XLOC_019333	kif20a	chr21:33815222 33892436	wt	ele	OK	19.2597	41.5853	1.11049	4.25433	5e-05	0.000441468	yes
XLOC_022724	XLOC_022724	terf1	chr24:13241243 13253660	wt	ele	OK	5.71578	12.3371	1.10998	2.98477	5e-05	0.000441468	yes
XLOC_002529	XLOC_002529	C3	chr1:56576601 56626806	wt	ele	OK	8.88656	19.1635	1.10867	4.37839	5e-05	0.000441468	yes
XLOC_033698	XLOC_033698	haus6	chr7:65672242 65681470	wt	ele	OK	9.01039	19.3615	1.10353	4.03142	5e-05	0.000441468	yes
XLOC_035754	XLOC_035754	si:dkey 57a22.11 si:dkey 57a22.12	chr9:23010727 23019494	wt	ele	OK	6.44782	13.8393	1.10189	4.30316	5e-05	0.000441468	yes
XLOC_031537	XLOC_031537	arl6ip6	chr6:13254959 13286125	wt	ele	OK	3.0306	6.48596	1.09771	3.16961	5e-05	0.000441468	yes
XLOC_016274	XLOC_016274	hltf	chr2:24706354 24731591	wt	ele	OK	4.87809	10.4301	1.09637	2.47376	5e-05	0.000441468	yes
XLOC_019925	XLOC_019925	gtpbp1l	chr22:14981137 14996572	wt	ele	OK	4.61197	9.847	1.0943	3.80176	5e-05	0.000441468	yes
XLOC_035557	XLOC_035557	pde11a	chr9:1493595 1568692	wt	ele	OK	0.817283	1.74322	1.09285	2.8247	5e-05	0.000441468	yes
XLOC_032807	XLOC_032807	ano1	chr7:54892544 55001626	wt	ele	OK	2.16914	4.62227	1.09148	3.0454	5e-05	0.000441468	yes
XLOC_032610	XLOC_032610	ccnb2	chr7:31962885 31967624	wt	ele	OK	6.94993	14.8015	1.09067	3.48439	5e-05	0.000441468	yes
XLOC_023533	XLOC_023533	ticrr	chr25:31306092 31327621	wt	ele	OK	5.41333	11.5253	1.09021	4.48035	5e-05	0.000441468	yes
XLOC_019822	XLOC_019822	CABZ01077217.1	chr22:8345938 8365483	wt	ele	OK	4.05696	8.63076	1.08909	2.89515	5e-05	0.000441468	yes
XLOC_014855	XLOC_014855	E2F3	chr19:29757139 29777212	wt	ele	OK	14.6169	31.0902	1.08883	4.60748	5e-05	0.000441468	yes
XLOC_009705	XLOC_009705	AL929092.1	chr15:30861582 30885608	wt	ele	OK	1.55839	3.31229	1.08777	2.52157	5e-05	0.000441468	yes
XLOC_022418	XLOC_022418	zgc:174160	chr24:25817943 25852597	wt	ele	OK	5.52262	11.7219	1.08579	2.82719	5e-05	0.000441468	yes
XLOC_026437	XLOC_026437	PEG3 si:dkeyp 4f2.2 si:dkeyp 4f2.3	chr4:31296580 31391304	wt	ele	OK	5.90214	12.5271	1.08575	3.20708	5e-05	0.000441468	yes
XLOC_034814	XLOC_034814	phf19	chr8:12857498 12920609	wt	ele	OK	1.89582	4.02328	1.08555	2.55448	5e-05	0.000441468	yes
XLOC_034144	XLOC_034144	pim2	chr8:9472702 9478902	wt	ele	OK	7.90629	16.7767	1.08539	3.92113	5e-05	0.000441468	yes
XLOC_017278	XLOC_017278	C20H1orf112	chr20:34019172 34034843	wt	ele	OK	4.91703	10.4332	1.08532	3.86201	5e-05	0.000441468	yes
XLOC_022452	XLOC_022452	ek1	chr24:28418662 28587234	wt	ele	OK	5.47167	11.6096	1.08526	3.72312	5e-05	0.000441468	yes
XLOC_024056	XLOC_024056	rbl2	chr25:37098858 37132094	wt	ele	OK	3.19207	6.77123	1.08493	4.19119	5e-05	0.000441468	yes
XLOC_007995	XLOC_007995	hmmr	chr14:29565319 29588274	wt	ele	OK	17.0559	36.1195	1.08251	4.62619	5e-05	0.000441468	yes
XLOC_025454	XLOC_025454	zgc:112484	chr3:32362171 32427074	wt	ele	OK	5.7809	12.2268	1.08069	3.55181	5e-05	0.000441468	yes
XLOC_029476	XLOC_029476	kntc1	chr5:69428448 69508975	wt	ele	OK	9.47496	20.0376	1.08052	3.64803	5e-05	0.000441468	yes
XLOC_014934	XLOC_014934	anln	chr19:36981398 36999022	wt	ele	OK	17.1414	36.2385	1.08004	4.24384	5e-05	0.000441468	yes
XLOC_007646	XLOC_007646	aurkb	chr14:2646 7578	wt	ele	OK	49.9516	105.526	1.07899	5.45113	5e-05	0.000441468	yes
XLOC_022294	XLOC_022294	fen1	chr24:11681047 11693950	wt	ele	OK	43.1955	91.2445	1.07885	4.6035	5e-05	0.000441468	yes
XLOC_034929	XLOC_034929	acer1	chr8:20770438 20783910	wt	ele	OK	2.97632	6.2847	1.07831	2.72872	5e-05	0.000441468	yes
XLOC_028989	XLOC_028989	dhfr	chr5:27782861 27791037	wt	ele	OK	10.9217	23.0478	1.07743	4.03842	5e-05	0.000441468	yes
XLOC_023686	XLOC_023686	INCENP	chr25:3555052 3581419	wt	ele	OK	56.1135	118.406	1.07733	4.08081	5e-05	0.000441468	yes
XLOC_008697	XLOC_008697		chr14:1768305 1769692	wt	ele	OK	3.99578	8.41632	1.07471	3.25454	5e-05	0.000441468	yes
XLOC_013637	XLOC_013637	gins2	chr18:30425307 30443767	wt	ele	OK	10.8996	22.9467	1.07401	4.07939	5e-05	0.000441468	yes
XLOC_012497	XLOC_012497	myo6b	chr17:36853956 37009527	wt	ele	OK	3.3139	6.97601	1.07387	3.81523	5e-05	0.000441468	yes
XLOC_006876	XLOC_006876	olig4	chr13:46534585 46535661	wt	ele	OK	12.2851	25.8508	1.0733	4.34442	5e-05	0.000441468	yes
XLOC_010407	XLOC_010407	rad54b	chr16:28982869 29008433	wt	ele	OK	2.13159	4.48165	1.0721	3.29068	5e-05	0.000441468	yes
XLOC_028306	XLOC_028306	si:dkey 149m13.5	chr4:55566410 55574530	wt	ele	OK	3.38292	7.11008	1.0716	3.15557	5e-05	0.000441468	yes
XLOC_031725	XLOC_031725	nasp	chr6:33596045 33614433	wt	ele	OK	85.9204	180.343	1.06967	4.51544	5e-05	0.000441468	yes
XLOC_006849	XLOC_006849	cyp1b1	chr13:42664243 42673248	wt	ele	OK	2.2823	4.7901	1.06957	3.0467	5e-05	0.000441468	yes
XLOC_019528	XLOC_019528		chr21:22448786 22453089	wt	ele	OK	10.0432	21.0574	1.0681	4.68885	5e-05	0.000441468	yes
XLOC_022793	XLOC_022793	spice1	chr24:21931561 21952077	wt	ele	OK	2.36533	4.95528	1.06693	2.8206	5e-05	0.000441468	yes
XLOC_019213	XLOC_019213	zbtb16a	chr21:22491203 22585568	wt	ele	OK	11.2937	23.6418	1.06582	3.88056	5e-05	0.000441468	yes
XLOC_007186	XLOC_007186	rhoua	chr13:24592208 24603161	wt	ele	OK	4.14128	8.66625	1.06533	3.65133	5e-05	0.000441468	yes
XLOC_006306	XLOC_006306		chr12:17080305 17087086	wt	ele	OK	1.07293	2.24238	1.06347	3.20994	5e-05	0.000441468	yes
XLOC_028960	XLOC_028960	ercc6l	chr5:25582519 25595454	wt	ele	OK	10.1606	21.2315	1.06322	4.72235	5e-05	0.000441468	yes
XLOC_016525	XLOC_016525	LIG1	chr2:44362776 44405822	wt	ele	OK	25.5453	53.3656	1.06285	4.37621	5e-05	0.000441468	yes
XLOC_002210	XLOC_002210	poglut1	chr1:27805288 27820099	wt	ele	OK	12.2456	25.5723	1.06232	3.72483	5e-05	0.000441468	yes
XLOC_018727	XLOC_018727	cfb	chr21:26810677 26825806	wt	ele	OK	13.2118	27.5491	1.06018	4.28373	5e-05	0.000441468	yes
XLOC_021323	XLOC_021323	armc1l	chr23:32139928 32157923	wt	ele	OK	21.1984	44.1391	1.0581	3.51099	5e-05	0.000441468	yes
XLOC_017962	XLOC_017962	cad	chr20:38813027 38852588	wt	ele	OK	22.9161	47.7116	1.05798	3.99348	5e-05	0.000441468	yes
XLOC_013754	XLOC_013754	kcnj1a.2 kcnj1a.3 kcnj1a.4 kcnj1a.5	chr18:47062019 47093833	wt	ele	OK	4.92603	10.2516	1.05736	3.15563	5e-05	0.000441468	yes
XLOC_016119	XLOC_016119	cdc7	chr2:10654924 10669092	wt	ele	OK	5.57471	11.5833	1.05508	2.96518	5e-05	0.000441468	yes
XLOC_034535	XLOC_034535		chr8:42695511 42715818	wt	ele	OK	2.04291	4.2397	1.05334	2.53965	5e-05	0.000441468	yes
XLOC_022441	XLOC_022441	cldn11b	chr24:27229142 27238109	wt	ele	OK	5.60603	11.6289	1.05267	3.29982	5e-05	0.000441468	yes
XLOC_021342	XLOC_021342	si:ch211 210c8.6	chr23:33952885 33971760	wt	ele	OK	12.2379	25.3841	1.05257	3.21014	5e-05	0.000441468	yes
XLOC_022237	XLOC_022237	zic4	chr24:5054609 5062137	wt	ele	OK	6.77905	14.0535	1.05177	3.72622	5e-05	0.000441468	yes
XLOC_031669	XLOC_031669	dtymk	chr6:26799055 26817072	wt	ele	OK	14.8042	30.6645	1.05057	2.67623	5e-05	0.000441468	yes
XLOC_034885	XLOC_034885	pola2	chr8:17687275 17703899	wt	ele	OK	15.2329	31.4517	1.04595	3.85717	5e-05	0.000441468	yes
XLOC_021987	XLOC_021987	cyp2aa9	chr23:42888155 42901803	wt	ele	OK	6.36013	13.1223	1.04489	3.71751	5e-05	0.000441468	yes
XLOC_008871	XLOC_008871	smc4	chr15:1529849 1568335	wt	ele	OK	26.5356	54.5876	1.04065	4.53447	5e-05	0.000441468	yes
XLOC_001694	XLOC_001694	otx1a	chr1:51428666 51439475	wt	ele	OK	5.74219	11.8086	1.04017	3.10392	5e-05	0.000441468	yes
XLOC_023993	XLOC_023993	CEP152 slc27a2b	chr25:33273359 33341953	wt	ele	OK	4.92016	10.1159	1.03984	3.94543	5e-05	0.000441468	yes
XLOC_005308	XLOC_005308	top2a	chr12:11702255 11719558	wt	ele	OK	60.4971	124.159	1.03725	4.50554	5e-05	0.000441468	yes
XLOC_013313	XLOC_013313	si:ch211 136a13.1	chr18:48076739 48099079	wt	ele	OK	4.27709	8.77154	1.0362	3.53771	5e-05	0.000441468	yes
XLOC_029016	XLOC_029016	ncaph	chr5:29904203 29915494	wt	ele	OK	19.4236	39.7634	1.03363	4.73189	5e-05	0.000441468	yes
XLOC_001927	XLOC_001927	pros1	chr1:217982 228857	wt	ele	OK	2.45293	5.01988	1.03315	2.67713	5e-05	0.000441468	yes
XLOC_006529	XLOC_006529	prepl	chr13:10186451 10213475	wt	ele	OK	1.76499	3.61095	1.03271	2.56787	5e-05	0.000441468	yes
XLOC_015553	XLOC_015553	efna2	chr2:26451796 26592673	wt	ele	OK	6.0876	12.4396	1.03099	3.98345	5e-05	0.000441468	yes
XLOC_021955	XLOC_021955	MDP1	chr23:41030005 41040760	wt	ele	OK	10.8722	22.2046	1.03022	3.88581	5e-05	0.000441468	yes
XLOC_023181	XLOC_023181	VWA5A	chr25:290618 309837	wt	ele	OK	10.7589	21.9702	1.03002	3.40772	5e-05	0.000441468	yes
XLOC_030474	XLOC_030474	cdca5	chr5:70170755 70176273	wt	ele	OK	15.3708	31.372	1.02929	4.53064	5e-05	0.000441468	yes
XLOC_002242	XLOC_002242	cenpk	chr1:30962710 30970084	wt	ele	OK	10.448	21.2527	1.02442	3.40354	5e-05	0.000441468	yes
XLOC_011654	XLOC_011654	TONSL	chr17:8645138 8699524	wt	ele	OK	3.58302	7.28728	1.02421	3.74156	5e-05	0.000441468	yes
XLOC_005547	XLOC_005547	cpn1	chr12:33296005 33318398	wt	ele	OK	30.786	62.5775	1.02337	4.28252	5e-05	0.000441468	yes
XLOC_013231	XLOC_013231	VWA7	chr18:38819903 38847567	wt	ele	OK	5.88955	11.9667	1.0228	3.58871	5e-05	0.000441468	yes
XLOC_028743	XLOC_028743	haus4	chr5:1813096 1834555	wt	ele	OK	10.0344	20.3814	1.0223	3.46334	5e-05	0.000441468	yes
XLOC_003147	XLOC_003147	CKAP2	chr10:33005696 33013085	wt	ele	OK	14.1746	28.7598	1.02074	4.21799	5e-05	0.000441468	yes
XLOC_005433	XLOC_005433	wnt3	chr12:23614307 23662752	wt	ele	OK	2.78321	5.64585	1.02044	3.19953	5e-05	0.000441468	yes
XLOC_021325	XLOC_021325	tmem194a	chr23:32180618 32192222	wt	ele	OK	6.47798	13.1362	1.01994	3.78871	5e-05	0.000441468	yes
XLOC_030684	XLOC_030684		chr5:47159650 47161500	wt	ele	OK	2.58101	5.23038	1.01898	2.86028	5e-05	0.000441468	yes
XLOC_022246	XLOC_022246	mastl	chr24:5976512 5991620	wt	ele	OK	8.80558	17.8364	1.01834	3.2844	5e-05	0.000441468	yes
XLOC_017120	XLOC_017120	jag2	chr20:21463355 21547780	wt	ele	OK	7.15429	14.4675	1.01594	4.20628	5e-05	0.000441468	yes
XLOC_012303	XLOC_012303	vrk1	chr17:18604113 18627398	wt	ele	OK	13.845	27.9906	1.01558	3.67669	5e-05	0.000441468	yes
XLOC_001706	XLOC_001706	etaa1	chr1:52046069 52054757	wt	ele	OK	2.86476	5.78252	1.01328	2.8952	5e-05	0.000441468	yes
XLOC_004476	XLOC_004476	sp1	chr11:87172 95396	wt	ele	OK	6.27086	12.6551	1.01299	3.56291	5e-05	0.000441468	yes
XLOC_021407	XLOC_021407	sall4	chr23:39046101 39054442	wt	ele	OK	4.45967	8.9992	1.01286	4.10065	5e-05	0.000441468	yes
XLOC_017791	XLOC_017791	paics	chr20:25647720 25674757	wt	ele	OK	174.822	352.639	1.0123	4.17787	5e-05	0.000441468	yes
XLOC_008170	XLOC_008170	CCNA2	chr14:49280470 49286571	wt	ele	OK	73.03	147.014	1.00939	3.46248	5e-05	0.000441468	yes
XLOC_017578	XLOC_017578	bub1	chr20:2638648 2669924	wt	ele	OK	16.0587	32.3243	1.00927	4.28844	5e-05	0.000441468	yes
XLOC_021660	XLOC_021660	dnmt5	chr23:17131888 17152704	wt	ele	OK	4.80136	9.65714	1.00815	2.72099	5e-05	0.000441468	yes
XLOC_001175	XLOC_001175	kpnb3	chr1:2017192 2056339	wt	ele	OK	52.5104	105.581	1.00767	4.0543	5e-05	0.000441468	yes
XLOC_022962	XLOC_022962	naglu	chr24:37800072 37813116	wt	ele	OK	3.09762	6.22524	1.00697	3.4034	5e-05	0.000441468	yes
XLOC_021046	XLOC_021046	RBBP8NL	chr23:7544636 7577597	wt	ele	OK	2.56756	5.15788	1.00638	3.27049	5e-05	0.000441468	yes
XLOC_024480	XLOC_024480	kri1 spc24	chr3:19158183 19185879	wt	ele	OK	31.5398	63.346	1.00608	3.98966	5e-05	0.000441468	yes
XLOC_005476	XLOC_005476	C12H17orf70	chr12:28109891 28130681	wt	ele	OK	2.62502	5.2701	1.0055	2.88318	5e-05	0.000441468	yes
XLOC_030810	XLOC_030810	rad54l	chr6:3280973 3298674	wt	ele	OK	5.82823	11.6985	1.00519	3.86079	5e-05	0.000441468	yes
XLOC_008650	XLOC_008650	ccna2	chr14:49305379 49310057	wt	ele	OK	52.698	105.684	1.00394	4.11668	5e-05	0.000441468	yes
XLOC_006153	XLOC_006153	rnf213b	chr12:37723793 37931071	wt	ele	OK	6.5267	13.0856	1.00355	2.73361	5e-05	0.000441468	yes
XLOC_007173	XLOC_007173	PRIM2	chr13:23712171 23836259	wt	ele	OK	17.584	35.2128	1.00184	3.9835	5e-05	0.000441468	yes
XLOC_003995	XLOC_003995	mybl2	chr11:1516848 1539928	wt	ele	OK	9.42366	18.8515	1.00032	3.90922	5e-05	0.000441468	yes
XLOC_020079	XLOC_020079	SSX2IP	chr22:25186708 25198168	wt	ele	OK	4.72361	9.44567	0.999763	2.95713	5e-05	0.000441468	yes
XLOC_009268	XLOC_009268	NUMA1	chr15:42966019 42981892	wt	ele	OK	10.9616	21.9117	0.99924	4.10057	5e-05	0.000441468	yes
XLOC_033210	XLOC_033210	dbx1a	chr7:17799841 17803249	wt	ele	OK	21.9969	43.9396	0.998223	4.60286	5e-05	0.000441468	yes
XLOC_010607	XLOC_010607	ATAD2	chr16:46270341 46287229	wt	ele	OK	17.3623	34.6374	0.996378	4.35342	5e-05	0.000441468	yes
XLOC_011559	XLOC_011559	pole2	chr17:112 3745	wt	ele	OK	11.6183	23.1272	0.993196	3.12486	5e-05	0.000441468	yes
XLOC_006770	XLOC_006770	arg2	chr13:33248148 33257976	wt	ele	OK	2.27757	4.53367	0.993186	2.78668	5e-05	0.000441468	yes
XLOC_027041	XLOC_027041	si:ch211 238e22.2 si:ch211 238e22.5	chr4:58087273 58095042	wt	ele	OK	5.01243	9.97732	0.993141	3.06477	5e-05	0.000441468	yes
XLOC_017884	XLOC_017884	nr2e1	chr20:32476276 32485287	wt	ele	OK	7.95057	15.8256	0.993129	4.06292	5e-05	0.000441468	yes
XLOC_001141	XLOC_001141	cenpe	chr1:134700 170776	wt	ele	OK	20.8141	41.3884	0.991661	3.65635	5e-05	0.000441468	yes
XLOC_004530	XLOC_004530	cdk2	chr11:3281631 3288790	wt	ele	OK	21.4165	42.5567	0.990664	4.04647	5e-05	0.000441468	yes
XLOC_010602	XLOC_010602	dbf4	chr16:45981957 45993436	wt	ele	OK	5.86961	11.6442	0.988279	3.54438	5e-05	0.000441468	yes
XLOC_023847	XLOC_023847	poc1b	chr25:18854216 18923382	wt	ele	OK	4.06688	8.06321	0.987432	3.18637	5e-05	0.000441468	yes
XLOC_029440	XLOC_029440	TTF1	chr5:66575651 66587054	wt	ele	OK	3.33781	6.61548	0.986943	2.51685	5e-05	0.000441468	yes
XLOC_019447	XLOC_019447	oatx	chr21:42634170 42654794	wt	ele	OK	10.4148	20.6115	0.984814	2.36274	5e-05	0.000441468	yes
XLOC_028727	XLOC_028727	ass1	chr5:500765 544869	wt	ele	OK	17.744	35.0254	0.981073	3.00425	5e-05	0.000441468	yes
XLOC_015816	XLOC_015816	pax3a	chr2:47580838 47641979	wt	ele	OK	5.04792	9.95664	0.979969	3.43597	5e-05	0.000441468	yes
XLOC_026301	XLOC_026301	mdm2	chr4:22061378 22071816	wt	ele	OK	35.4795	69.9773	0.979901	3.43518	5e-05	0.000441468	yes
XLOC_005335	XLOC_005335	adprh	chr12:16028128 16075734	wt	ele	OK	5.12278	10.1028	0.979751	2.82413	5e-05	0.000441468	yes
XLOC_001166	XLOC_001166	atp1a1a.3	chr1:1562079 1572446	wt	ele	OK	8.8163	17.3783	0.979038	4.15213	5e-05	0.000441468	yes
XLOC_013482	XLOC_013482	rfx4	chr18:14918083 14959949	wt	ele	OK	8.05628	15.8784	0.978876	3.68678	5e-05	0.000441468	yes
XLOC_021750	XLOC_021750	her9	chr23:23693661 23695447	wt	ele	OK	32.9502	64.8268	0.976301	4.13179	5e-05	0.000441468	yes
XLOC_016648	XLOC_016648	tpm4b	chr2:55995982 56031817	wt	ele	OK	7.74474	15.2193	0.974613	3.18029	5e-05	0.000441468	yes
XLOC_012461	XLOC_012461	vsx2	chr17:31709969 31719135	wt	ele	OK	14.2748	28.0317	0.973586	3.66252	5e-05	0.000441468	yes
XLOC_008278	XLOC_008278	eif4ebp3l	chr14:6939193 6953894	wt	ele	OK	19.9508	39.1771	0.973565	4.3713	5e-05	0.000441468	yes
XLOC_001380	XLOC_001380	GSG2	chr1:22263362 22332102	wt	ele	OK	6.90578	13.5489	0.972305	2.90388	5e-05	0.000441468	yes
XLOC_010557	XLOC_010557	cenpw rspo3	chr16:42798037 43005545	wt	ele	OK	14.6439	28.7071	0.971107	3.81168	5e-05	0.000441468	yes
XLOC_009324	XLOC_009324		chr15:112475 116105	wt	ele	OK	7.51168	14.7224	0.970803	2.809	5e-05	0.000441468	yes
XLOC_036151	XLOC_036151	cdca7a	chr9:2878270 2890758	wt	ele	OK	37.8062	74.0653	0.970172	4.09852	5e-05	0.000441468	yes
XLOC_004588	XLOC_004588	SNORD12	chr11:7383998 7385701	wt	ele	OK	12.87	25.1883	0.968738	2.46136	5e-05	0.000441468	yes
XLOC_029764	XLOC_029764	ranbp1	chr5:20790449 20798382	wt	ele	OK	144.53	282.852	0.968675	3.63779	5e-05	0.000441468	yes
XLOC_017263	XLOC_017263	mycn	chr20:33333308 33338265	wt	ele	OK	28.6618	56.0778	0.968301	4.12761	5e-05	0.000441468	yes
XLOC_019247	XLOC_019247	zgc:110540	chr21:25879335 25883673	wt	ele	OK	26.4576	51.6816	0.965972	4.55138	5e-05	0.000441468	yes
XLOC_018832	XLOC_018832		chr21:38718301 38726231	wt	ele	OK	6.71656	13.1097	0.964836	3.93759	5e-05	0.000441468	yes
XLOC_032704	XLOC_032704	ncapg2	chr7:41598126 41620274	wt	ele	OK	11.0738	21.6001	0.963888	3.23867	5e-05	0.000441468	yes
XLOC_002334	XLOC_002334	bdh2	chr1:44096668 44110096	wt	ele	OK	9.79942	19.1064	0.963285	2.92675	5e-05	0.000441468	yes
XLOC_019218	XLOC_019218	rfc2	chr21:24484009 24491337	wt	ele	OK	14.0112	27.3019	0.962425	3.6335	5e-05	0.000441468	yes
XLOC_001381	XLOC_001381	ncapg	chr1:22333571 22370015	wt	ele	OK	33.9378	66.0911	0.961564	3.08019	5e-05	0.000441468	yes
XLOC_016059	XLOC_016059	prdx1	chr2:5748880 5758078	wt	ele	OK	77.9633	151.775	0.961066	4.09363	5e-05	0.000441468	yes
XLOC_004879	XLOC_004879	traip	chr11:36003614 36011950	wt	ele	OK	6.31623	12.291	0.960468	3.60016	5e-05	0.000441468	yes
XLOC_005287	XLOC_005287	dnajc9	chr12:10235052 10264605	wt	ele	OK	26.9505	52.4237	0.959907	3.5344	5e-05	0.000441468	yes
XLOC_034769	XLOC_034769	si:ch211 255g12.7	chr8:7449910 7467268	wt	ele	OK	15.6735	30.4696	0.959046	2.68248	5e-05	0.000441468	yes
XLOC_000168	XLOC_000168		Zv9_NA363:2472 24247	wt	ele	OK	16.4113	31.8921	0.958512	3.98405	5e-05	0.000441468	yes
XLOC_032655	XLOC_032655	tppp3	chr7:36684324 36696951	wt	ele	OK	3.46721	6.72755	0.956306	2.38922	5e-05	0.000441468	yes
XLOC_006749	XLOC_006749	gdf10a	chr13:31509179 31514306	wt	ele	OK	15.0522	29.2035	0.956165	3.80318	5e-05	0.000441468	yes
XLOC_023974	XLOC_023974	si:ch211 93f2.1	chr25:31352582 31419481	wt	ele	OK	5.36172	10.3978	0.955513	3.81571	5e-05	0.000441468	yes
XLOC_009170	XLOC_009170	brca2	chr15:31158344 31175009	wt	ele	OK	2.43991	4.72274	0.952799	3.69931	5e-05	0.000441468	yes
XLOC_033144	XLOC_033144	f13a1b	chr7:9077450 9152613	wt	ele	OK	5.60652	10.8394	0.951107	3.2663	5e-05	0.000441468	yes
XLOC_028403	XLOC_028403	zgc:165515	chr4:59330119 59349465	wt	ele	OK	3.61835	6.99395	0.950776	2.75822	5e-05	0.000441468	yes
XLOC_009787	XLOC_009787	CR388129.1	chr15:38774825 38813030	wt	ele	OK	5.20323	10.0329	0.94726	2.94682	5e-05	0.000441468	yes
XLOC_035045	XLOC_035045	tuba8l	chr8:29198440 29202948	wt	ele	OK	302.79	582.124	0.943011	3.92421	5e-05	0.000441468	yes
XLOC_036555	XLOC_036555	bard1	chr9:41705650 41756776	wt	ele	OK	2.16239	4.1558	0.942499	2.6105	5e-05	0.000441468	yes
XLOC_019376	XLOC_019376		chr21:38712869 38715504	wt	ele	OK	11.3159	21.7297	0.941315	3.65409	5e-05	0.000441468	yes
XLOC_034911	XLOC_034911	cpox	chr8:19121104 19137938	wt	ele	OK	10.2912	19.7598	0.941153	3.48909	5e-05	0.000441468	yes
XLOC_019299	XLOC_019299	rrm1	chr21:29535096 29550709	wt	ele	OK	91.6829	175.742	0.938738	3.8955	5e-05	0.000441468	yes
XLOC_011849	XLOC_011849	acss1	chr17:25675691 25695147	wt	ele	OK	4.20749	8.06297	0.938353	3.34578	5e-05	0.000441468	yes
XLOC_033339	XLOC_033339	ptgr1	chr7:25543156 25557970	wt	ele	OK	57.3814	109.682	0.934675	4.03699	5e-05	0.000441468	yes
XLOC_027206	XLOC_027206	foxm1	chr4:5671389 5708367	wt	ele	OK	9.73701	18.6095	0.93449	3.38689	5e-05	0.000441468	yes
XLOC_016170	XLOC_016170	atr	chr2:16204487 16270102	wt	ele	OK	3.37295	6.44569	0.934322	3.55244	5e-05	0.000441468	yes
XLOC_020972	XLOC_020972	stxbp3	chr23:1684700 1721389	wt	ele	OK	10.7309	20.4999	0.933852	4.04861	5e-05	0.000441468	yes
XLOC_004057	XLOC_004057	nr2f6b	chr11:6150116 6168241	wt	ele	OK	17.0592	32.5883	0.933809	3.89847	5e-05	0.000441468	yes
XLOC_011259	XLOC_011259	thbs3a	chr16:45737484 45771384	wt	ele	OK	1.82024	3.47436	0.932615	2.74836	5e-05	0.000441468	yes
XLOC_017366	XLOC_017366	mcm9	chr20:41833643 41871798	wt	ele	OK	1.97914	3.77514	0.931652	2.70238	5e-05	0.000441468	yes
XLOC_017508	XLOC_017508	bub1ba	chr20:53824766 53859791	wt	ele	OK	8.82975	16.8203	0.929759	3.29598	5e-05	0.000441468	yes
XLOC_012273	XLOC_012273	wdhd1	chr17:14991017 15030636	wt	ele	OK	11.797	22.4679	0.929443	3.74651	5e-05	0.000441468	yes
XLOC_001253	XLOC_001253	chtf18	chr1:8275114 8304091	wt	ele	OK	6.63319	12.6271	0.928748	3.68495	5e-05	0.000441468	yes
XLOC_018499	XLOC_018499	oacyl	chr21:9364146 9382247	wt	ele	OK	8.34262	15.8616	0.926962	3.48158	5e-05	0.000441468	yes
XLOC_034937	XLOC_034937	haus5	chr8:21415556 21452847	wt	ele	OK	6.31327	12.001	0.926701	2.73602	5e-05	0.000441468	yes
XLOC_032199	XLOC_032199	slc12a10.2	chr7:4504025 4550128	wt	ele	OK	2.651	5.03832	0.926405	2.87506	5e-05	0.000441468	yes
XLOC_002628	XLOC_002628	lpar2b	chr1:59937887 59962126	wt	ele	OK	9.25837	17.5933	0.926192	3.35415	5e-05	0.000441468	yes
XLOC_024638	XLOC_024638	si:dkey 66i24.9	chr3:31244573 31248649	wt	ele	OK	3.7439	7.10899	0.925101	3.09411	5e-05	0.000441468	yes
XLOC_007486	XLOC_007486	ss18l2	chr13:52334010 52336258	wt	ele	OK	17.254	32.7481	0.924485	3.96368	5e-05	0.000441468	yes
XLOC_025362	XLOC_025362	atad5a	chr3:26768642 26790755	wt	ele	OK	9.21883	17.4884	0.923745	3.74552	5e-05	0.000441468	yes
XLOC_029784	XLOC_029784	si:ch211 225b11.1	chr5:22570099 22597975	wt	ele	OK	3.52584	6.68486	0.922929	2.48608	5e-05	0.000441468	yes
XLOC_021745	XLOC_021745	ca6	chr23:22929074 22944810	wt	ele	OK	34.7179	65.7884	0.922153	3.95094	5e-05	0.000441468	yes
XLOC_030440	XLOC_030440	ANXA1	chr5:67503836 67514158	wt	ele	OK	14.3225	27.0843	0.91918	2.9451	5e-05	0.000441468	yes
XLOC_002024	XLOC_002024	casc5	chr1:10270473 10301481	wt	ele	OK	10.8259	20.4606	0.918361	3.61861	5e-05	0.000441468	yes
XLOC_010439	XLOC_010439	nes	chr16:31271825 31282459	wt	ele	OK	10.7961	20.3946	0.91767	3.90636	5e-05	0.000441468	yes
XLOC_019008	XLOC_019008	haus1	chr21:5305847 5317006	wt	ele	OK	8.75071	16.5167	0.916453	2.73063	5e-05	0.000441468	yes
XLOC_007466	XLOC_007466	b3galnt2	chr13:50772333 50805930	wt	ele	OK	6.90354	13.03	0.916426	2.76522	5e-05	0.000441468	yes
XLOC_000213	XLOC_000213		Zv9_NA426:10775 14335	wt	ele	OK	3.23946	6.11388	0.916334	2.44881	5e-05	0.000441468	yes
XLOC_005787	XLOC_005787	dcxr	chr12:3635049 3645698	wt	ele	OK	7.5492	14.2468	0.916238	2.74804	5e-05	0.000441468	yes
XLOC_016064	XLOC_016064	SMC6	chr2:5964012 6173674	wt	ele	OK	2.90825	5.48664	0.915773	3.14063	5e-05	0.000441468	yes
XLOC_006417	XLOC_006417	gstal zgc:173961	chr13:701263 728427	wt	ele	OK	40.9547	77.2642	0.915772	4.29146	5e-05	0.000441468	yes
XLOC_035884	XLOC_035884	ENSDARG00000007077	chr9:33873421 33908876	wt	ele	OK	4.10149	7.73725	0.915671	3.37922	5e-05	0.000441468	yes
XLOC_030321	XLOC_030321	ccnb1	chr5:55149483 55153246	wt	ele	OK	60.1814	113.492	0.915206	3.69271	5e-05	0.000441468	yes
XLOC_025350	XLOC_025350	kpna2	chr3:25471233 25478284	wt	ele	OK	133.623	251.928	0.914844	3.77779	5e-05	0.000441468	yes
XLOC_030847	XLOC_030847	sox21a	chr6:7331079 7332155	wt	ele	OK	5.92355	11.1663	0.914614	2.94375	5e-05	0.000441468	yes
XLOC_023564	XLOC_023564	anxa2a	chr25:35058723 35074189	wt	ele	OK	38.0646	71.7052	0.913628	3.97661	5e-05	0.000441468	yes
XLOC_020013	XLOC_020013	rgmd	chr22:19914291 19964750	wt	ele	OK	36.7372	69.1712	0.91293	3.87328	5e-05	0.000441468	yes
XLOC_016243	XLOC_016243	ivns1abpb	chr2:22837432 22849680	wt	ele	OK	17.0965	32.1823	0.912561	3.88407	5e-05	0.000441468	yes
XLOC_007106	XLOC_007106	whsc1	chr13:12863007 12900008	wt	ele	OK	15.0377	28.2993	0.912181	3.83458	5e-05	0.000441468	yes
XLOC_019332	XLOC_019332	zgc:56585	chr21:33801627 33809876	wt	ele	OK	3.32628	6.25405	0.910881	2.54604	5e-05	0.000441468	yes
XLOC_013491	XLOC_013491	plekhg7	chr18:15566905 15611780	wt	ele	OK	3.56212	6.69368	0.910063	2.6058	5e-05	0.000441468	yes
XLOC_012129	XLOC_012129	arhgap11a	chr17:734496 755944	wt	ele	OK	10.4621	19.6292	0.907827	3.78538	5e-05	0.000441468	yes
XLOC_021329	XLOC_021329	tpx2	chr23:32267023 32276800	wt	ele	OK	59.7686	112.101	0.907337	3.42584	5e-05	0.000441468	yes
XLOC_021080	XLOC_021080	HAUS8	chr23:12561494 12594968	wt	ele	OK	7.62368	14.2871	0.906158	2.45166	5e-05	0.000441468	yes
XLOC_013099	XLOC_013099	ctsh	chr18:26208477 26215014	wt	ele	OK	7.22968	13.5453	0.905789	2.77234	5e-05	0.000441468	yes
XLOC_023453	XLOC_023453	hexa	chr25:22940061 22964651	wt	ele	OK	8.86808	16.6104	0.90539	3.27644	5e-05	0.000441468	yes
XLOC_019612	XLOC_019612	elf3	chr22:636673 640308	wt	ele	OK	5.16438	9.66609	0.904338	2.4846	5e-05	0.000441468	yes
XLOC_006698	XLOC_006698	asrgl1	chr13:27992787 28006654	wt	ele	OK	3.49317	6.53689	0.904067	2.67836	5e-05	0.000441468	yes
XLOC_017901	XLOC_017901	sele	chr20:33973249 34001545	wt	ele	OK	1.27541	2.38669	0.904052	2.44806	5e-05	0.000441468	yes
XLOC_015404	XLOC_015404	selj	chr2:15981488 15992851	wt	ele	OK	13.7088	25.6374	0.903152	3.0036	5e-05	0.000441468	yes
XLOC_034352	XLOC_034352	gstm3	chr8:26155114 26159957	wt	ele	OK	19.0276	35.558	0.902085	3.23831	5e-05	0.000441468	yes
XLOC_017972	XLOC_017972	pbk	chr20:39384437 39392715	wt	ele	OK	25.5364	47.684	0.90095	3.77729	5e-05	0.000441468	yes
XLOC_014359	XLOC_014359	tinagl1	chr19:43304941 43370810	wt	ele	OK	7.89858	14.7449	0.900555	2.83164	5e-05	0.000441468	yes
XLOC_035850	XLOC_035850	rnaseh2b	chr9:30704741 30712480	wt	ele	OK	30.076	56.1375	0.900354	3.256	5e-05	0.000441468	yes
XLOC_022445	XLOC_022445	tnfsf10	chr24:27802725 27807780	wt	ele	OK	12.4066	23.1495	0.89987	2.39635	5e-05	0.000441468	yes
XLOC_013040	XLOC_013040	zwilch	chr18:19237358 19265406	wt	ele	OK	5.98221	11.1599	0.899577	2.62516	5e-05	0.000441468	yes
XLOC_017847	XLOC_017847	rrm2	chr20:29518376 29525282	wt	ele	OK	21.5056	40.0858	0.898379	4.05222	5e-05	0.000441468	yes
XLOC_025326	XLOC_025326	MSL1	chr3:23755956 23762235	wt	ele	OK	3.21384	5.99031	0.898335	2.53583	5e-05	0.000441468	yes
XLOC_015651	XLOC_015651	kif2c	chr2:33644785 33668583	wt	ele	OK	18.1438	33.8184	0.898328	3.17525	5e-05	0.000441468	yes
XLOC_035610	XLOC_035610	ptprna	chr9:7590048 7661140	wt	ele	OK	11.1105	20.698	0.897568	3.18023	5e-05	0.000441468	yes
XLOC_010681	XLOC_010681	serpinb1l1 serpinb1l4 si:ch73 303g23.4	chr16:54847384 54904343	wt	ele	OK	13.3056	24.779	0.897081	2.96555	5e-05	0.000441468	yes
XLOC_002455	XLOC_002455	rnaseh2a	chr1:52206820 52214585	wt	ele	OK	24.7873	46.1363	0.896304	3.61304	5e-05	0.000441468	yes
XLOC_008521	XLOC_008521		chr14:33723452 33733219	wt	ele	OK	3.19764	5.95104	0.896133	2.92293	5e-05	0.000441468	yes
XLOC_022534	XLOC_022534	wdr90	chr24:38998044 39044924	wt	ele	OK	1.43989	2.67827	0.895344	2.8183	5e-05	0.000441468	yes
XLOC_003487	XLOC_003487	smc5	chr10:15646671 15673514	wt	ele	OK	8.40094	15.6217	0.89493	2.9113	5e-05	0.000441468	yes
XLOC_023443	XLOC_023443	rad52	chr25:21769144 21785683	wt	ele	OK	5.99277	11.1399	0.894438	2.55045	5e-05	0.000441468	yes
XLOC_010528	XLOC_010528	map7d1a	chr16:39635328 39727248	wt	ele	OK	3.25594	6.03992	0.891455	2.4865	5e-05	0.000441468	yes
XLOC_015046	XLOC_015046	cdca8	chr19:49493932 49508194	wt	ele	OK	40.1881	74.5132	0.890728	4.12822	5e-05	0.000441468	yes
XLOC_029206	XLOC_029206	sub1b	chr5:42762144 42769912	wt	ele	OK	28.746	53.2473	0.889347	4.19821	5e-05	0.000441468	yes
XLOC_027807	XLOC_027807	si:ch211 209n20.57	chr4:36646516 36858020	wt	ele	OK	2.4946	4.61714	0.88819	2.78632	5e-05	0.000441468	yes
XLOC_009823	XLOC_009823	serpine2	chr15:42088813 42130944	wt	ele	OK	16.3975	30.3477	0.888116	3.45717	5e-05	0.000441468	yes
XLOC_008102	XLOC_008102	BX088707.1	chr14:40176965 40323945	wt	ele	OK	172.297	318.814	0.887811	3.70754	5e-05	0.000441468	yes
XLOC_015070	XLOC_015070	CLSPN	chr19:50178199 50187870	wt	ele	OK	16.3512	30.2469	0.887391	3.5711	5e-05	0.000441468	yes
XLOC_010900	XLOC_010900	crabp2a	chr16:16678480 16692124	wt	ele	OK	15.4173	28.4981	0.886314	3.96566	5e-05	0.000441468	yes
XLOC_008217	XLOC_008217	mcm7	chr14:201290 212779	wt	ele	OK	83.1955	153.559	0.884213	3.45754	5e-05	0.000441468	yes
XLOC_009259	XLOC_009259	NUMA1	chr15:42613843 42623200	wt	ele	OK	11.9484	22.0075	0.881178	2.85289	5e-05	0.000441468	yes
XLOC_034563	XLOC_034563	fzd10	chr8:45837726 45912215	wt	ele	OK	16.4009	30.1663	0.879162	3.71508	5e-05	0.000441468	yes
XLOC_031182	XLOC_031182	itpr1a	chr6:39853915 39923244	wt	ele	OK	2.09604	3.85444	0.878857	3.32859	5e-05	0.000441468	yes
XLOC_001071	XLOC_001071		Zv9_scaffold3545:5289 112230	wt	ele	OK	1.64962	3.03147	0.877882	2.72789	5e-05	0.000441468	yes
XLOC_021885	XLOC_021885	racgap1	chr23:33973417 33988915	wt	ele	OK	19.2259	35.322	0.877514	3.48669	5e-05	0.000441468	yes
XLOC_006468	XLOC_006468	ppm1g	chr13:5866273 5883082	wt	ele	OK	36.6156	67.184	0.875659	4.08482	5e-05	0.000441468	yes
XLOC_018985	XLOC_018985	setx	chr21:4204681 4251075	wt	ele	OK	3.72794	6.83228	0.873991	2.82485	5e-05	0.000441468	yes
XLOC_000256	XLOC_000256		Zv9_NA470:52694 84836	wt	ele	OK	8.93374	16.3634	0.87314	3.59117	5e-05	0.000441468	yes
XLOC_021988	XLOC_021988	cyp2aa8	chr23:42910749 42919521	wt	ele	OK	12.1707	22.2755	0.872043	3.64308	5e-05	0.000441468	yes
XLOC_031101	XLOC_031101	SHROOM2	chr6:30116301 30143220	wt	ele	OK	9.07059	16.5768	0.869898	3.53752	5e-05	0.000441468	yes
XLOC_018440	XLOC_018440	phyhd1	chr21:4766981 4783103	wt	ele	OK	8.90179	16.2614	0.869282	2.78974	5e-05	0.000441468	yes
XLOC_019182	XLOC_019182	skp2	chr21:21281860 21311207	wt	ele	OK	9.93943	18.1534	0.869006	2.67942	5e-05	0.000441468	yes
XLOC_028840	XLOC_028840	rfc5	chr5:13731092 13762969	wt	ele	OK	19.9206	36.3528	0.867804	3.75083	5e-05	0.000441468	yes
XLOC_023375	XLOC_023375	CECR2	chr25:16958894 17045622	wt	ele	OK	7.21746	13.1616	0.866767	2.9824	5e-05	0.000441468	yes
XLOC_029969	XLOC_029969	dab2	chr5:33961389 33976481	wt	ele	OK	11.0767	20.1725	0.864869	3.39801	5e-05	0.000441468	yes
XLOC_031822	XLOC_031822	sfi1	chr6:40830922 40852662	wt	ele	OK	3.16208	5.75443	0.863799	2.88209	5e-05	0.000441468	yes
XLOC_005351	XLOC_005351	CABZ01044814.2	chr12:17583550 17586054	wt	ele	OK	7.82917	14.2465	0.863676	3.10393	5e-05	0.000441468	yes
XLOC_033665	XLOC_033665	mad2l1	chr7:58874320 58882730	wt	ele	OK	48.1571	87.5384	0.862169	4.44084	5e-05	0.000441468	yes
XLOC_033648	XLOC_033648	galns	chr7:56805951 56896738	wt	ele	OK	6.22152	11.3042	0.861518	2.89893	5e-05	0.000441468	yes
XLOC_030508	XLOC_030508	psat1	chr5:72352360 72365894	wt	ele	OK	62.6376	113.683	0.859911	4.18983	5e-05	0.000441468	yes
XLOC_005604	XLOC_005604	azi1 st6galnac	chr12:37723793 37931071	wt	ele	OK	8.16821	14.815	0.858962	2.22852	5e-05	0.000441468	yes
XLOC_031784	XLOC_031784	espl1	chr6:39599714 39632024	wt	ele	OK	9.62053	17.4366	0.857933	3.73134	5e-05	0.000441468	yes
XLOC_018517	XLOC_018517	glrx	chr21:10200336 10244703	wt	ele	OK	43.8104	79.2402	0.854961	4.1289	5e-05	0.000441468	yes
XLOC_033527	XLOC_033527	shcbp1	chr7:42230705 42254717	wt	ele	OK	6.21718	11.2384	0.854099	3.09784	5e-05	0.000441468	yes
XLOC_031848	XLOC_031848	lrrn1	chr6:43007816 43023475	wt	ele	OK	60.3739	109.044	0.85291	3.53211	5e-05	0.000441468	yes
XLOC_029250	XLOC_029250	ADAMTS3	chr5:46941323 47159464	wt	ele	OK	2.72599	4.92324	0.852831	2.82962	5e-05	0.000441468	yes
XLOC_022723	XLOC_022723	rdh10a	chr24:13155612 13177308	wt	ele	OK	27.2834	49.2118	0.850981	3.65729	5e-05	0.000441468	yes
XLOC_002533	XLOC_002533	c3a	chr1:56676992 56723747	wt	ele	OK	52.9888	95.4978	0.84978	3.47005	5e-05	0.000441468	yes
XLOC_036055	XLOC_036055	smarcal1	chr9:53943696 54120230	wt	ele	OK	2.9945	5.39405	0.849056	2.43322	5e-05	0.000441468	yes
XLOC_001801	XLOC_001801	asf1bb	chr1:56450236 56461094	wt	ele	OK	23.7883	42.8337	0.848491	3.52636	5e-05	0.000441468	yes
XLOC_013349	XLOC_013349	DHDH	chr18:756211 768393	wt	ele	OK	12.0401	21.6596	0.847152	2.66195	5e-05	0.000441468	yes
XLOC_017078	XLOC_017078	nfkbiaa	chr20:16922346 16925201	wt	ele	OK	6.51493	11.7196	0.847097	2.44882	5e-05	0.000441468	yes
XLOC_007793	XLOC_007793	BSCL2	chr14:6165183 6182148	wt	ele	OK	9.42323	16.9507	0.847049	2.98926	5e-05	0.000441468	yes
XLOC_017621	XLOC_017621	cep128	chr20:6009003 6087735	wt	ele	OK	1.72546	3.10096	0.845731	2.21388	5e-05	0.000441468	yes
XLOC_001926	XLOC_001926	gas6	chr1:187474 213136	wt	ele	OK	10.7305	19.2766	0.845128	3.62511	5e-05	0.000441468	yes
XLOC_010467	XLOC_010467	phc1	chr16:34257007 34274883	wt	ele	OK	7.47909	13.4326	0.844809	3.41471	5e-05	0.000441468	yes
XLOC_017314	XLOC_017314	ephx1	chr20:36652666 36663973	wt	ele	OK	2.6458	4.74995	0.844206	2.326	5e-05	0.000441468	yes
XLOC_034315	XLOC_034315	mapre1a	chr8:24234891 24243160	wt	ele	OK	12.1995	21.8652	0.841818	2.97375	5e-05	0.000441468	yes
XLOC_018459	XLOC_018459	fpgs	chr21:6034592 6054858	wt	ele	OK	7.03989	12.614	0.841406	3.08039	5e-05	0.000441468	yes
XLOC_013126	XLOC_013126	cenpn	chr18:29848421 29855499	wt	ele	OK	7.30261	13.0839	0.841307	2.88709	5e-05	0.000441468	yes
XLOC_007940	XLOC_007940	ccng1	chr14:23132060 23143178	wt	ele	OK	359.605	643.874	0.840365	2.99169	5e-05	0.000441468	yes
XLOC_029591	XLOC_029591	si:ch211 160e1.5	chr5:2107091 2108816	wt	ele	OK	26.2703	47.0038	0.839345	3.9327	5e-05	0.000441468	yes
XLOC_008038	XLOC_008038	sox3	chr14:33703956 33705712	wt	ele	OK	58.6486	104.74	0.836642	3.95794	5e-05	0.000441468	yes
XLOC_029600	XLOC_029600	CIT	chr5:2523876 2756443	wt	ele	OK	5.81261	10.3793	0.836457	3.48954	5e-05	0.000441468	yes
XLOC_014173	XLOC_014173	nutf2l	chr19:21260307 21266055	wt	ele	OK	39.957	71.3049	0.835554	4.20036	5e-05	0.000441468	yes
XLOC_025255	XLOC_025255	pold1	chr3:16307810 16339225	wt	ele	OK	17.6503	31.4958	0.835464	3.60839	5e-05	0.000441468	yes
XLOC_000624	XLOC_000624		Zv9_NA918:43133 47276	wt	ele	OK	1.9316	3.44445	0.834479	2.61766	5e-05	0.000441468	yes
XLOC_003514	XLOC_003514	ska1	chr10:17573495 17581151	wt	ele	OK	9.95661	17.7532	0.834354	2.70222	5e-05	0.000441468	yes
XLOC_002522	XLOC_002522	dnajb1b	chr1:56270007 56290011	wt	ele	OK	16.9378	30.1984	0.834227	3.25332	5e-05	0.000441468	yes
XLOC_036229	XLOC_036229	umps	chr9:11852733 11863302	wt	ele	OK	17.5607	31.2929	0.833482	3.32865	5e-05	0.000441468	yes
XLOC_011354	XLOC_011354	mcm3	chr16:54766748 54780384	wt	ele	OK	11.2748	20.0501	0.830506	3.50017	5e-05	0.000441468	yes
XLOC_022514	XLOC_022514	rbbp8	chr24:37701128 37720957	wt	ele	OK	3.67647	6.53473	0.829807	2.55936	5e-05	0.000441468	yes
XLOC_027153	XLOC_027153	nap1l1	chr4:2213916 2241486	wt	ele	OK	183.342	325.546	0.828326	2.51574	5e-05	0.000441468	yes
XLOC_035937	XLOC_035937	slc15a2	chr9:38372186 38392583	wt	ele	OK	2.25428	4.0019	0.828016	2.27758	5e-05	0.000441468	yes
XLOC_027374	XLOC_027374	parpbp	chr4:16395887 16438607	wt	ele	OK	8.87043	15.7313	0.82656	2.69712	5e-05	0.000441468	yes
XLOC_034755	XLOC_034755	diabloa	chr8:5862378 5865902	wt	ele	OK	7.37894	13.0861	0.826552	2.62475	5e-05	0.000441468	yes
XLOC_020774	XLOC_020774	TERF2IP	chr22:37449284 37464978	wt	ele	OK	4.93914	8.75594	0.826001	2.6058	5e-05	0.000441468	yes
XLOC_021359	XLOC_021359	tuba1b	chr23:35765100 35768063	wt	ele	OK	73.8636	130.932	0.82588	3.42821	5e-05	0.000441468	yes
XLOC_010444	XLOC_010444	ctsk	chr16:31753227 31762840	wt	ele	OK	17.5519	31.072	0.823988	3.66735	5e-05	0.000441468	yes
XLOC_035577	XLOC_035577	hat1	chr9:3278942 3310741	wt	ele	OK	40.4845	71.6563	0.823723	4.01059	5e-05	0.000441468	yes
XLOC_005694	XLOC_005694	anxa11b	chr12:50249466 50270603	wt	ele	OK	62.7181	110.979	0.823337	3.53717	5e-05	0.000441468	yes
XLOC_020670	XLOC_020670	pdgfaa	chr22:26672329 26687102	wt	ele	OK	9.92152	17.5406	0.822062	3.2413	5e-05	0.000441468	yes
XLOC_019253	XLOC_019253	banf1	chr21:26103287 26108757	wt	ele	OK	119.113	210.57	0.821966	4.28229	5e-05	0.000441468	yes
XLOC_002516	XLOC_002516	C1H7orf55	chr1:55708457 55722433	wt	ele	OK	14.569	25.7451	0.821397	3.52029	5e-05	0.000441468	yes
XLOC_029063	XLOC_029063	ftr83	chr5:32380720 32388510	wt	ele	OK	10.7537	19.0011	0.821254	2.74704	5e-05	0.000441468	yes
XLOC_005350	XLOC_005350	kif20bb	chr12:17524008 17550720	wt	ele	OK	9.3527	16.5014	0.819129	3.49251	5e-05	0.000441468	yes
XLOC_010418	XLOC_010418	invs	chr16:29670787 29730941	wt	ele	OK	1.89495	3.33633	0.816103	2.31917	5e-05	0.000441468	yes
XLOC_021662	XLOC_021662	dnmt4	chr23:17181579 17272160	wt	ele	OK	9.75998	17.1838	0.816102	3.40925	5e-05	0.000441468	yes
XLOC_016324	XLOC_016324	cnpy1	chr2:29701086 29762469	wt	ele	OK	16.4862	29.0025	0.814916	3.37173	5e-05	0.000441468	yes
XLOC_011745	XLOC_011745	cdk1	chr17:20753843 20759613	wt	ele	OK	65.5897	115.221	0.81286	4.07406	5e-05	0.000441468	yes
XLOC_003685	XLOC_003685	rfc3	chr10:35052535 35061737	wt	ele	OK	23.8895	41.9589	0.8126	3.23279	5e-05	0.000441468	yes
XLOC_009595	XLOC_009595	rad1	chr15:23133413 23138148	wt	ele	OK	5.34735	9.38147	0.810988	2.45354	5e-05	0.000441468	yes
XLOC_011874	XLOC_011874	MIS18BP1	chr17:28670880 28682464	wt	ele	OK	6.30235	11.0531	0.810487	3.11854	5e-05	0.000441468	yes
XLOC_035338	XLOC_035338	gpr144	chr8:54858765 54902643	wt	ele	OK	2.4249	4.24315	0.807208	2.49096	5e-05	0.000441468	yes
XLOC_024476	XLOC_024476	il12rb2l	chr3:19038406 19064947	wt	ele	OK	2.53607	4.43106	0.805059	2.49574	5e-05	0.000441468	yes
XLOC_008914	XLOC_008914	ENSDARG00000060312	chr15:5473358 5531796	wt	ele	OK	5.47729	9.56271	0.803958	3.20308	5e-05	0.000441468	yes
XLOC_031558	XLOC_031558	cxcr7b	chr6:15651809 15657695	wt	ele	OK	38.7064	67.5471	0.80332	3.85389	5e-05	0.000441468	yes
XLOC_031773	XLOC_031773	arhgef25b	chr6:39185354 39206926	wt	ele	OK	7.58569	13.2334	0.802831	2.71972	5e-05	0.000441468	yes
XLOC_007852	XLOC_007852		chr14:11630642 11636659	wt	ele	OK	3.82882	6.66804	0.800363	2.80398	5e-05	0.000441468	yes
XLOC_021001	XLOC_021001	arl6ip5b	chr23:4305031 4310787	wt	ele	OK	10.7349	18.6808	0.799247	3.12198	5e-05	0.000441468	yes
XLOC_032760	XLOC_032760	crabp1b	chr7:49776902 49799738	wt	ele	OK	17.7944	30.9546	0.798731	2.75135	5e-05	0.000441468	yes
XLOC_014140	XLOC_014140	cratb	chr19:18394541 18408473	wt	ele	OK	6.2069	10.7873	0.797384	2.78579	5e-05	0.000441468	yes
XLOC_036028	XLOC_036028	si:ch211 278b7.8 spc25	chr9:49866598 49912261	wt	ele	OK	14.6663	25.4857	0.797183	3.27692	5e-05	0.000441468	yes
XLOC_009488	XLOC_009488	zgc:114130	chr15:14067248 14071222	wt	ele	OK	12.1344	21.078	0.796634	3.19819	5e-05	0.000441468	yes
XLOC_001350	XLOC_001350	si:dkey 245p14.4 smc2	chr1:18277014 18304105	wt	ele	OK	38.8556	67.3438	0.793423	2.96755	5e-05	0.000441468	yes
XLOC_014280	XLOC_014280	fabp11a	chr19:33411581 33414040	wt	ele	OK	17.9129	31.0104	0.791754	3.28563	5e-05	0.000441468	yes
XLOC_007320	XLOC_007320	tacc3	chr13:36282171 36293842	wt	ele	OK	34.5171	59.7516	0.791663	3.45594	5e-05	0.000441468	yes
XLOC_018592	XLOC_018592	rai14	chr21:18375724 18436486	wt	ele	OK	6.0699	10.5056	0.791417	3.14381	5e-05	0.000441468	yes
XLOC_029705	XLOC_029705	nos1	chr5:13184044 13317863	wt	ele	OK	5.76182	9.96107	0.789776	2.93163	5e-05	0.000441468	yes
XLOC_017327	XLOC_017327	atf3	chr20:37819240 37825345	wt	ele	OK	4.85511	8.38934	0.789054	2.65432	5e-05	0.000441468	yes
XLOC_021529	XLOC_021529	CDH26	chr23:985400 1027343	wt	ele	OK	5.86019	10.1258	0.789016	2.84607	5e-05	0.000441468	yes
XLOC_025624	XLOC_025624	shmt1	chr3:40255710 40270853	wt	ele	OK	42.0608	72.6686	0.788853	3.28531	5e-05	0.000441468	yes
XLOC_009025	XLOC_009025	alcamb	chr15:18800039 18840632	wt	ele	OK	44.6747	77.0904	0.787092	3.4894	5e-05	0.000441468	yes
XLOC_030998	XLOC_030998	glulb	chr6:19951105 19955767	wt	ele	OK	135.096	233.097	0.786949	3.0634	5e-05	0.000441468	yes
XLOC_002515	XLOC_002515	pane1	chr1:55700410 55705939	wt	ele	OK	11.7949	20.3384	0.786047	2.39092	5e-05	0.000441468	yes
XLOC_019941	XLOC_019941	stil	chr22:16106164 16118685	wt	ele	OK	3.66749	6.32134	0.785437	3.00334	5e-05	0.000441468	yes
XLOC_000262	XLOC_000262		Zv9_NA478:4920 5925	wt	ele	OK	14.9801	25.8027	0.784476	3.15501	5e-05	0.000441468	yes
XLOC_006484	XLOC_006484	hells	chr13:7617614 7634176	wt	ele	OK	17.524	30.1727	0.783912	3.35597	5e-05	0.000441468	yes
XLOC_007064	XLOC_007064	CPXM1	chr13:8940879 8974224	wt	ele	OK	7.65222	13.169	0.783199	2.84064	5e-05	0.000441468	yes
XLOC_010904	XLOC_010904	dscc1	chr16:16867026 16882351	wt	ele	OK	6.28881	10.8174	0.782497	2.66851	5e-05	0.000441468	yes
XLOC_015378	XLOC_015378	zgc:66475	chr2:13740465 13773965	wt	ele	OK	14.3893	24.7026	0.779664	3.08496	5e-05	0.000441468	yes
XLOC_008167	XLOC_008167	mgst2	chr14:49151751 49155148	wt	ele	OK	19.5443	33.5163	0.778115	2.79522	5e-05	0.000441468	yes
XLOC_008580	XLOC_008580	gsr	chr14:40349420 40369597	wt	ele	OK	13.5844	23.2878	0.77763	3.03035	5e-05	0.000441468	yes
XLOC_017432	XLOC_017432	rad51	chr20:46678959 46693134	wt	ele	OK	12.4315	21.2997	0.776839	2.78852	5e-05	0.000441468	yes
XLOC_010736	XLOC_010736	IQGAP3	chr16:58602555 58758637	wt	ele	OK	14.5809	24.971	0.77617	2.94463	5e-05	0.000441468	yes
XLOC_025224	XLOC_025224	hirip3	chr3:14798114 14815085	wt	ele	OK	14.2322	24.3629	0.775529	3.38219	5e-05	0.000441468	yes
XLOC_034439	XLOC_034439	c7a	chr8:32720979 32767666	wt	ele	OK	4.93729	8.45	0.775232	2.57932	5e-05	0.000441468	yes
XLOC_033594	XLOC_033594	prc1b	chr7:51810284 51824630	wt	ele	OK	11.7921	20.1715	0.774495	2.83908	5e-05	0.000441468	yes
XLOC_029849	XLOC_029849	sox19a	chr5:25868114 25870432	wt	ele	OK	42.2726	72.2555	0.773384	3.11386	5e-05	0.000441468	yes
XLOC_008212	XLOC_008212	LYAR	chr14:150581 154835	wt	ele	OK	18.1932	31.0681	0.77203	2.7923	5e-05	0.000441468	yes
XLOC_006462	XLOC_006462	psap	chr13:4681537 4705600	wt	ele	OK	187.188	318.861	0.76844	2.97487	5e-05	0.000441468	yes
XLOC_015054	XLOC_015054	kpnb1	chr19:49796245 49809511	wt	ele	OK	46.8359	79.752	0.767906	3.28749	5e-05	0.000441468	yes
XLOC_029088	XLOC_029088	c9	chr5:33982801 33992904	wt	ele	OK	60.2358	102.546	0.767584	3.24698	5e-05	0.000441468	yes
XLOC_018467	XLOC_018467	CENPT	chr21:6351084 6374255	wt	ele	OK	8.69749	14.7943	0.76637	2.96919	5e-05	0.000441468	yes
XLOC_015709	XLOC_015709	homez	chr2:37974005 37979417	wt	ele	OK	11.1554	18.9691	0.765918	2.95258	5e-05	0.000441468	yes
XLOC_026422	XLOC_026422	si:dkey 57k17.1	chr4:29987294 29999211	wt	ele	OK	4.23219	7.18187	0.762956	2.69332	5e-05	0.000441468	yes
XLOC_004607	XLOC_004607	ect2	chr11:10452630 10520389	wt	ele	OK	9.12911	15.4898	0.762771	3.08531	5e-05	0.000441468	yes
XLOC_004428	XLOC_004428	sult6b1	chr11:44488332 44500653	wt	ele	OK	43.5662	73.8708	0.761794	3.78811	5e-05	0.000441468	yes
XLOC_007174	XLOC_007174	si:ch211 120p12.3	chr13:23857799 23890416	wt	ele	OK	4.03251	6.83559	0.761386	2.7783	5e-05	0.000441468	yes
XLOC_031805	XLOC_031805	tspo	chr6:40509085 40514065	wt	ele	OK	38.6065	65.3758	0.759914	3.79711	5e-05	0.000441468	yes
XLOC_006883	XLOC_006883	fbxo5	chr13:47400087 47413346	wt	ele	OK	11.901	20.1347	0.758603	2.61912	5e-05	0.000441468	yes
XLOC_034870	XLOC_034870	ttc39a	chr8:16985869 17034527	wt	ele	OK	3.79278	6.41453	0.75809	2.16319	5e-05	0.000441468	yes
XLOC_000261	XLOC_000261		Zv9_NA478:14 2640	wt	ele	OK	8.76945	14.8083	0.755853	2.38874	5e-05	0.000441468	yes
XLOC_024723	XLOC_024723	scpep1	chr3:36126404 36152092	wt	ele	OK	15.2122	25.6584	0.754196	2.74218	5e-05	0.000441468	yes
XLOC_024575	XLOC_024575	pigq	chr3:26210728 26225297	wt	ele	OK	8.20062	13.8087	0.751775	2.87291	5e-05	0.000441468	yes
XLOC_029134	XLOC_029134	dlb	chr5:38294021 38301923	wt	ele	OK	47.1872	79.4488	0.751629	3.25742	5e-05	0.000441468	yes
XLOC_016312	XLOC_016312	dhcr7	chr2:27967559 27989080	wt	ele	OK	6.67185	11.23	0.7512	2.58628	5e-05	0.000441468	yes
XLOC_001945	XLOC_001945	gart	chr1:989263 1021620	wt	ele	OK	18.667	31.3935	0.749977	3.22648	5e-05	0.000441468	yes
XLOC_008432	XLOC_008432	cxcl14	chr14:25400462 25410337	wt	ele	OK	27.5672	46.3127	0.748455	3.52168	5e-05	0.000441468	yes
XLOC_002156	XLOC_002156	rfc1	chr1:22017138 22042663	wt	ele	OK	12.3232	20.7022	0.748415	2.95182	5e-05	0.000441468	yes
XLOC_009631	XLOC_009631	rpa1	chr15:25834679 25875330	wt	ele	OK	55.4765	93.1804	0.748151	3.50298	5e-05	0.000441468	yes
XLOC_006253	XLOC_006253	CABZ01102230.1	chr12:50312815 50328793	wt	ele	OK	6.9673	11.702	0.748078	2.83705	5e-05	0.000441468	yes
XLOC_014812	XLOC_014812	asns	chr19:26139932 26163864	wt	ele	OK	14.6867	24.6572	0.747497	3.048	5e-05	0.000441468	yes
XLOC_036097	XLOC_036097	bzw1b	chr9:50227 57751	wt	ele	OK	51.1835	85.8829	0.746692	3.26494	5e-05	0.000441468	yes
XLOC_017564	XLOC_017564	ankrd6b	chr20:1223616 1262933	wt	ele	OK	4.23329	7.09499	0.745022	2.3568	5e-05	0.000441468	yes
XLOC_010569	XLOC_010569	dek	chr16:43680737 43696209	wt	ele	OK	27.5265	46.1023	0.744017	3.21154	5e-05	0.000441468	yes
XLOC_017549	XLOC_017549	si:ch211 241j12.3	chr20:180046 203611	wt	ele	OK	3.27511	5.48348	0.743548	2.7096	5e-05	0.000441468	yes
XLOC_027128	XLOC_027128	naga	chr4:756762 762909	wt	ele	OK	14.4192	24.1362	0.743205	2.8908	5e-05	0.000441468	yes
XLOC_017167	XLOC_017167	cep135	chr20:25741324 25764922	wt	ele	OK	6.3758	10.668	0.742617	2.94416	5e-05	0.000441468	yes
XLOC_012550	XLOC_012550	rtkn2	chr17:43655002 43668157	wt	ele	OK	5.51612	9.21952	0.741039	2.6559	5e-05	0.000441468	yes
XLOC_018069	XLOC_018069	fos	chr20:46803307 46805437	wt	ele	OK	6.82235	11.3999	0.740675	2.38138	5e-05	0.000441468	yes
XLOC_005938	XLOC_005938	si:dkey 239j18.3	chr12:17701393 17703579	wt	ele	OK	12.529	20.9307	0.740352	2.96944	5e-05	0.000441468	yes
XLOC_021009	XLOC_021009	nup210	chr23:4534281 4608696	wt	ele	OK	16.2976	27.21	0.739482	3.26313	5e-05	0.000441468	yes
XLOC_036240	XLOC_036240	sumo3b	chr9:12924936 12929216	wt	ele	OK	84.0289	140.174	0.73826	3.7528	5e-05	0.000441468	yes
XLOC_012544	XLOC_012544	plk4	chr17:43455539 43473184	wt	ele	OK	9.49132	15.8309	0.738062	3.15835	5e-05	0.000441468	yes
XLOC_005982	XLOC_005982	tefa	chr12:20241114 20249499	wt	ele	OK	20.7176	34.5407	0.73744	2.89808	5e-05	0.000441468	yes
XLOC_011353	XLOC_011353	AGO1	chr16:54638334 54708249	wt	ele	OK	7.11128	11.8535	0.737131	2.68271	5e-05	0.000441468	yes
XLOC_031921	XLOC_031921	sdc4	chr6:52615762 52628296	wt	ele	OK	41.857	69.7258	0.736223	3.24769	5e-05	0.000441468	yes
XLOC_011265	XLOC_011265	wu:fb12e11	chr16:45866127 45879478	wt	ele	OK	16.9541	28.2301	0.735601	2.75983	5e-05	0.000441468	yes
XLOC_021188	XLOC_021188	pax7b	chr23:21151524 21229061	wt	ele	OK	5.59664	9.31889	0.735598	2.34095	5e-05	0.000441468	yes
XLOC_031132	XLOC_031132	serbp1a	chr6:34817956 34825058	wt	ele	OK	14.573	24.2506	0.734724	2.97156	5e-05	0.000441468	yes
XLOC_009864	XLOC_009864	CU914813.1	chr15:45693650 45700086	wt	ele	OK	18.2706	30.292	0.729411	3.10218	5e-05	0.000441468	yes
XLOC_029953	XLOC_029953	pkn3	chr5:33466220 33495010	wt	ele	OK	4.80173	7.94696	0.726849	2.61378	5e-05	0.000441468	yes
XLOC_028859	XLOC_028859	CKAP2L	chr5:14757456 14768101	wt	ele	OK	10.6501	17.6136	0.72582	2.96498	5e-05	0.000441468	yes
XLOC_014215	XLOC_014215	rpa3	chr19:25950689 25952850	wt	ele	OK	33.3466	55.1146	0.724895	3.56849	5e-05	0.000441468	yes
XLOC_004556	XLOC_004556	gamt	chr11:5890484 5900306	wt	ele	OK	276.429	456.86	0.724843	3.08609	5e-05	0.000441468	yes
XLOC_020405	XLOC_020405	BX511034.1	chr22:7554975 7610873	wt	ele	OK	4.17013	6.89123	0.724669	2.41442	5e-05	0.000441468	yes
XLOC_014982	XLOC_014982	zgc:110239	chr19:44009742 44024018	wt	ele	OK	21.8918	36.175	0.724604	2.962	5e-05	0.000441468	yes
XLOC_015528	XLOC_015528	ifi30	chr2:24532155 24537113	wt	ele	OK	12.8141	21.1672	0.724101	2.42574	5e-05	0.000441468	yes
XLOC_005305	XLOC_005305	nhp2l1b	chr12:11522870 11526264	wt	ele	OK	61.9458	102.304	0.72378	3.8818	5e-05	0.000441468	yes
XLOC_006565	XLOC_006565	rpia	chr13:13791275 13805301	wt	ele	OK	12.3332	20.3605	0.723229	3.19188	5e-05	0.000441468	yes
XLOC_031440	XLOC_031440	si:ch211 114n24.6 tuba8l4	chr6:6889598 6909916	wt	ele	OK	548.108	904.733	0.723032	2.74603	5e-05	0.000441468	yes
XLOC_011532	XLOC_011532		chr16:54634889 54638255	wt	ele	OK	5.21839	8.60449	0.721484	2.7814	5e-05	0.000441468	yes
XLOC_010629	XLOC_010629	nr2f5	chr16:49358591 49391556	wt	ele	OK	24.4867	40.3616	0.720984	3.33304	5e-05	0.000441468	yes
XLOC_030384	XLOC_030384	MIS12	chr5:60690577 60695124	wt	ele	OK	12.649	20.84	0.720324	2.54286	5e-05	0.000441468	yes
XLOC_000670	XLOC_000670		Zv9_NA947:1300 24452	wt	ele	OK	4.25186	6.99506	0.718241	2.88556	5e-05	0.000441468	yes
XLOC_025279	XLOC_025279	hagh	chr3:18596408 18614432	wt	ele	OK	14.7347	24.2401	0.718179	2.78541	5e-05	0.000441468	yes
XLOC_001252	XLOC_001252	plk1	chr1:8229224 8238721	wt	ele	OK	56.9117	93.5983	0.717758	2.69972	5e-05	0.000441468	yes
XLOC_017000	XLOC_017000	igfbp1a	chr20:7029527 7033442	wt	ele	OK	13.716	22.5369	0.716429	2.38587	5e-05	0.000441468	yes
XLOC_008489	XLOC_008489	wu:fc26g07	chr14:31768091 31775002	wt	ele	OK	8.40602	13.7938	0.714531	2.83153	5e-05	0.000441468	yes
XLOC_009806	XLOC_009806	slc25a36b	chr15:40295661 40336192	wt	ele	OK	5.05554	8.29492	0.714363	2.15471	5e-05	0.000441468	yes
XLOC_029055	XLOC_029055	hmbsa	chr5:32157457 32173443	wt	ele	OK	10.6263	17.4301	0.71394	2.20186	5e-05	0.000441468	yes
XLOC_028983	XLOC_028983	tmem2	chr5:27404701 27458213	wt	ele	OK	9.33794	15.3115	0.713437	2.84712	5e-05	0.000441468	yes
XLOC_030862	XLOC_030862	cyp27c1 ercc3	chr6:8096616 8158549	wt	ele	OK	15.0765	24.7208	0.713424	3.00497	5e-05	0.000441468	yes
XLOC_005718	XLOC_005718	PTS	chr12:322842 326718	wt	ele	OK	38.5115	63.1182	0.712768	2.75466	5e-05	0.000441468	yes
XLOC_033286	XLOC_033286	TMEM179B	chr7:21067369 21080845	wt	ele	OK	10.8642	17.8041	0.712619	2.61976	5e-05	0.000441468	yes
XLOC_003210	XLOC_003210	ucp2	chr10:37906720 37926603	wt	ele	OK	81.6988	133.819	0.711898	3.4618	5e-05	0.000441468	yes
XLOC_031255	XLOC_031255	mov10a	chr6:48288916 48316938	wt	ele	OK	5.05116	8.27319	0.711828	2.56618	5e-05	0.000441468	yes
XLOC_028931	XLOC_028931	msna	chr5:23916480 23957365	wt	ele	OK	58.0557	95.0528	0.711292	3.191	5e-05	0.000441468	yes
XLOC_031952	XLOC_031952	ube2c	chr6:55261893 55289122	wt	ele	OK	94.2369	154.257	0.71097	3.85303	5e-05	0.000441468	yes
XLOC_012326	XLOC_012326	bnip4	chr17:20061953 20066462	wt	ele	OK	11.5211	18.8252	0.708386	2.37481	5e-05	0.000441468	yes
XLOC_010255	XLOC_010255	BX005429.1 fdps si:dkey 85k15.7	chr16:15758272 15788119	wt	ele	OK	35.6175	58.192	0.708234	2.81238	5e-05	0.000441468	yes
XLOC_021128	XLOC_021128	prim1	chr23:18009904 18019625	wt	ele	OK	20.66	33.7443	0.707807	2.85329	5e-05	0.000441468	yes
XLOC_029605	XLOC_029605	hspb1	chr5:3584620 3601420	wt	ele	OK	20.9742	34.2575	0.707804	2.56272	5e-05	0.000441468	yes
XLOC_006089	XLOC_006089	entpd1	chr12:32387898 32441864	wt	ele	OK	27.9587	45.6587	0.707591	2.48508	5e-05	0.000441468	yes
XLOC_032172	XLOC_032172	supt16h	chr7:1689178 1757082	wt	ele	OK	47.1787	76.974	0.706235	3.07362	5e-05	0.000441468	yes
XLOC_023669	XLOC_023669		chr25:2489969 2578020	wt	ele	OK	5.29836	8.64284	0.705959	2.35946	5e-05	0.000441468	yes
XLOC_004386	XLOC_004386	AL929022.1	chr11:38934067 38997534	wt	ele	OK	9.11392	14.8452	0.703855	2.75622	5e-05	0.000441468	yes
XLOC_030963	XLOC_030963	ntn1a	chr6:17998827 18121555	wt	ele	OK	5.39943	8.79177	0.703347	2.5583	5e-05	0.000441468	yes
XLOC_025116	XLOC_025116	CABZ01080098.1	chr3:6505141 6523755	wt	ele	OK	10.4231	16.9701	0.703207	3.11152	5e-05	0.000441468	yes
XLOC_036396	XLOC_036396	kdelc1	chr9:28431880 28444217	wt	ele	OK	9.45951	15.3965	0.702769	2.51163	5e-05	0.000441468	yes
XLOC_016347	XLOC_016347	e2f5 lrrcc1	chr2:31392511 31427184	wt	ele	OK	6.27495	10.2096	0.702255	2.38932	5e-05	0.000441468	yes
XLOC_021615	XLOC_021615	foxp1a	chr23:10744236 10829076	wt	ele	OK	13.345	21.6935	0.700967	2.78014	5e-05	0.000441468	yes
XLOC_031953	XLOC_031953	ctsa	chr6:55292153 55305680	wt	ele	OK	22.5128	36.5906	0.700731	2.72168	5e-05	0.000441468	yes
XLOC_024336	XLOC_024336	junbb	chr3:8434975 8436624	wt	ele	OK	9.9649	16.1829	0.699544	2.76196	5e-05	0.000441468	yes
XLOC_001676	XLOC_001676	msxb	chr1:49859298 49861712	wt	ele	OK	18.417	29.8913	0.698688	3.09962	5e-05	0.000441468	yes
XLOC_030883	XLOC_030883	acp5a	chr6:9433684 9441079	wt	ele	OK	36.6259	59.4442	0.69867	2.3011	5e-05	0.000441468	yes
XLOC_025765	XLOC_025765	timp2b	chr3:58446853 58480406	wt	ele	OK	4.53591	7.3609	0.698489	2.543	5e-05	0.000441468	yes
XLOC_004174	XLOC_004174	arrdc2	chr11:13710021 13719300	wt	ele	OK	6.57324	10.6561	0.696996	2.54572	5e-05	0.000441468	yes
XLOC_022949	XLOC_022949	mcm4	chr24:37031304 37056313	wt	ele	OK	40.0583	64.913	0.696407	3.04694	5e-05	0.000441468	yes
XLOC_012473	XLOC_012473	cenpf	chr17:32927922 32948802	wt	ele	OK	14.6847	23.7726	0.694986	3.01932	5e-05	0.000441468	yes
XLOC_003629	XLOC_003629	btg3	chr10:29052596 29062709	wt	ele	OK	17.0493	27.587	0.694279	2.6036	5e-05	0.000441468	yes
XLOC_030982	XLOC_030982	rhbdl3	chr6:19211934 19287047	wt	ele	OK	8.50475	13.7584	0.693968	2.39634	5e-05	0.000441468	yes
XLOC_012221	XLOC_012221	BAZ1A	chr17:9896578 9910326	wt	ele	OK	17.8281	28.7866	0.69124	2.95797	5e-05	0.000441468	yes
XLOC_022784	XLOC_022784	si:ch211 161h7.4	chr24:21501071 21516701	wt	ele	OK	13.3457	21.5294	0.689927	2.97082	5e-05	0.000441468	yes
XLOC_011663	XLOC_011663	baz1a	chr17:10539404 10555005	wt	ele	OK	15.9188	25.6764	0.689708	2.79162	5e-05	0.000441468	yes
XLOC_031191	XLOC_031191	slc6a11a	chr6:40559324 40577066	wt	ele	OK	7.7629	12.5187	0.689413	2.55557	5e-05	0.000441468	yes
XLOC_030513	XLOC_030513	aldh2.1 aldh2.2	chr5:72440788 72589614	wt	ele	OK	38.1902	61.5389	0.688297	2.94565	5e-05	0.000441468	yes
XLOC_033478	XLOC_033478	slc12a4	chr7:36722801 36769026	wt	ele	OK	6.24035	10.0542	0.688097	2.70449	5e-05	0.000441468	yes
XLOC_035935	XLOC_035935	gli2a	chr9:38194144 38349217	wt	ele	OK	6.65535	10.7155	0.687118	2.88313	5e-05	0.000441468	yes
XLOC_007978	XLOC_007978	gm2a	chr14:27233997 27237434	wt	ele	OK	15.8865	25.5753	0.686947	2.89905	5e-05	0.000441468	yes
XLOC_021599	XLOC_021599	plagl2	chr23:7661304 7748424	wt	ele	OK	5.64511	9.07409	0.684753	2.34104	5e-05	0.000441468	yes
XLOC_025229	XLOC_025229	spns1	chr3:15059912 15079815	wt	ele	OK	32.342	51.9822	0.684608	2.71341	5e-05	0.000441468	yes
XLOC_016139	XLOC_016139	prtfdc1	chr2:12062930 12087538	wt	ele	OK	6.71239	10.7829	0.683849	2.3133	5e-05	0.000441468	yes
XLOC_031249	XLOC_031249		chr6:47364253 47402005	wt	ele	OK	12.9173	20.7162	0.681457	2.99724	5e-05	0.000441468	yes
XLOC_005999	XLOC_005999	slc16a6a	chr12:21914106 21952866	wt	ele	OK	12.5137	20.0674	0.681346	2.51196	5e-05	0.000441468	yes
XLOC_011891	XLOC_011891	tpp1	chr17:30902990 30915234	wt	ele	OK	16.2687	26.0686	0.680219	2.70294	5e-05	0.000441468	yes
XLOC_033609	XLOC_033609	NHSL2	chr7:52923002 53081963	wt	ele	OK	4.16842	6.67886	0.6801	2.37459	5e-05	0.000441468	yes
XLOC_011062	XLOC_011062	nacad	chr16:29852633 29869234	wt	ele	OK	3.61517	5.79016	0.679538	2.67211	5e-05	0.000441468	yes
XLOC_035316	XLOC_035316	ACSL6	chr8:53091370 53138622	wt	ele	OK	12.2653	19.6219	0.67788	2.66261	5e-05	0.000441468	yes
XLOC_022507	XLOC_022507	cebpd	chr24:37059018 37088264	wt	ele	OK	9.41997	15.0683	0.677725	2.72246	5e-05	0.000441468	yes
XLOC_010206	XLOC_010206		chr16:12032142 12037426	wt	ele	OK	6.36713	10.18	0.677017	2.4521	5e-05	0.000441468	yes
XLOC_002604	XLOC_002604	CABZ01066772.1	chr1:59439204 59469961	wt	ele	OK	5.52004	8.81433	0.675171	2.63987	5e-05	0.000441468	yes
XLOC_033438	XLOC_033438	kif18a	chr7:33311273 33477231	wt	ele	OK	7.22341	11.5104	0.672185	2.63083	5e-05	0.000441468	yes
XLOC_006871	XLOC_006871	zgc:158387	chr13:46096368 46102191	wt	ele	OK	55.0822	87.7117	0.671182	3.40394	5e-05	0.000441468	yes
XLOC_030795	XLOC_030795	orc4	chr6:1422820 1436521	wt	ele	OK	14.323	22.8011	0.670774	2.44059	5e-05	0.000441468	yes
XLOC_018888	XLOC_018888	dkc1	chr21:42107787 42122249	wt	ele	OK	38.7794	61.6596	0.669036	2.90874	5e-05	0.000441468	yes
XLOC_020047	XLOC_020047	kif14	chr22:22801293 22839546	wt	ele	OK	7.40352	11.7671	0.668476	2.7726	5e-05	0.000441468	yes
XLOC_027112	XLOC_027112	terfa	chr4:62065589 62081128	wt	ele	OK	12.5757	19.9788	0.667837	2.56333	5e-05	0.000441468	yes
XLOC_010800	XLOC_010800	nt5c3a	chr16:8379868 8402571	wt	ele	OK	91.8277	145.833	0.667311	2.50485	5e-05	0.000441468	yes
XLOC_016467	XLOC_016467	epha4a	chr2:39771956 39840524	wt	ele	OK	18.7276	29.6866	0.664652	2.8383	5e-05	0.000441468	yes
XLOC_021555	XLOC_021555	rnf114	chr23:3515246 3525294	wt	ele	OK	4.43153	7.00913	0.661431	2.30844	5e-05	0.000441468	yes
XLOC_030796	XLOC_030796	myl9b	chr6:1700289 1712516	wt	ele	OK	33.6935	53.2749	0.660986	2.78946	5e-05	0.000441468	yes
XLOC_006637	XLOC_006637	zgc:193505	chr13:22816013 22818314	wt	ele	OK	128.967	203.918	0.660984	2.801	5e-05	0.000441468	yes
XLOC_031008	XLOC_031008	ccbl2	chr6:21470187 21478598	wt	ele	OK	10.8756	17.1628	0.658192	2.22728	5e-05	0.000441468	yes
XLOC_035788	XLOC_035788	ints6	chr9:24858784 24875049	wt	ele	OK	5.34328	8.42876	0.657595	2.49961	5e-05	0.000441468	yes
XLOC_029876	XLOC_029876	anxa1a	chr5:27222729 27227874	wt	ele	OK	110.318	173.852	0.656192	2.86853	5e-05	0.000441468	yes
XLOC_010339	XLOC_010339	s100a10b	chr16:25636601 25640200	wt	ele	OK	230.299	362.64	0.655034	2.74073	5e-05	0.000441468	yes
XLOC_022251	XLOC_022251		chr24:6191508 6204237	wt	ele	OK	2.85208	4.49051	0.654866	2.43694	5e-05	0.000441468	yes
XLOC_003150	XLOC_003150	wnt11r	chr10:33059095 33077995	wt	ele	OK	18.4317	29.005	0.65411	2.95517	5e-05	0.000441468	yes
XLOC_008883	XLOC_008883	panx1a	chr15:2466951 2481000	wt	ele	OK	13.4075	21.0863	0.653266	2.44065	5e-05	0.000441468	yes
XLOC_004731	XLOC_004731	zmynd8	chr11:18981351 19024822	wt	ele	OK	3.71141	5.83641	0.653115	2.31949	5e-05	0.000441468	yes
XLOC_030258	XLOC_030258	fbp1a	chr5:46451894 46462320	wt	ele	OK	14.6815	23.0532	0.650969	2.79127	5e-05	0.000441468	yes
XLOC_001421	XLOC_001421	SPAG5	chr1:25642826 25666508	wt	ele	OK	15.4518	24.2415	0.649702	2.95177	5e-05	0.000441468	yes
XLOC_007924	XLOC_007924	aldob	chr14:22107710 22116461	wt	ele	OK	278.008	436.018	0.649262	2.5205	5e-05	0.000441468	yes
XLOC_018146	XLOC_018146	naprt1	chr20:52613083 52653937	wt	ele	OK	17.9594	28.1431	0.648046	2.91465	5e-05	0.000441468	yes
XLOC_011972	XLOC_011972	fosl2	chr17:41427841 41443739	wt	ele	OK	2.66835	4.17713	0.646562	2.1676	5e-05	0.000441468	yes
XLOC_011066	XLOC_011066	si:dkey 12j5.1	chr16:30340602 30496569	wt	ele	OK	12.738	19.9084	0.644239	2.32614	5e-05	0.000441468	yes
XLOC_027476	XLOC_027476	celsr1a	chr4:27502047 27645785	wt	ele	OK	4.96896	7.75176	0.641579	2.71905	5e-05	0.000441468	yes
XLOC_014557	XLOC_014557	cica	chr19:6708061 6757256	wt	ele	OK	3.90501	6.08662	0.640314	2.67571	5e-05	0.000441468	yes
XLOC_020229	XLOC_020229	cp	chr22:41133173 41159202	wt	ele	OK	24.0761	37.5222	0.640145	2.39077	5e-05	0.000441468	yes
XLOC_012595	XLOC_012595	orc3	chr17:49469446 49495618	wt	ele	OK	10.692	16.6553	0.639454	2.48979	5e-05	0.000441468	yes
XLOC_011844	XLOC_011844	clic4	chr17:25286113 25322065	wt	ele	OK	39.1079	60.8753	0.638397	2.19134	5e-05	0.000441468	yes
XLOC_034624	XLOC_034624	ddx51	chr8:51325952 51350226	wt	ele	OK	6.4023	9.96474	0.638242	2.17813	5e-05	0.000441468	yes
XLOC_015063	XLOC_015063	SGOL1	chr19:49965024 49977061	wt	ele	OK	11.2519	17.5062	0.637693	2.51244	5e-05	0.000441468	yes
XLOC_004732	XLOC_004732	id1	chr11:19124534 19125635	wt	ele	OK	316.259	491.207	0.635225	3.24859	5e-05	0.000441468	yes
XLOC_013714	XLOC_013714	cdon	chr18:42454225 42530325	wt	ele	OK	29.4766	45.7066	0.632833	2.5426	5e-05	0.000441468	yes
XLOC_007913	XLOC_007913	polr1a	chr14:20081185 20140596	wt	ele	OK	6.41164	9.94065	0.632646	2.41997	5e-05	0.000441468	yes
XLOC_019885	XLOC_019885	enc1l	chr22:10892043 10906103	wt	ele	OK	16.4982	25.5675	0.631999	2.71885	5e-05	0.000441468	yes
XLOC_015661	XLOC_015661	plk3	chr2:35324469 35332623	wt	ele	OK	14.785	22.8956	0.630944	2.65113	5e-05	0.000441468	yes
XLOC_023413	XLOC_023413	nedd1	chr25:20031090 20047058	wt	ele	OK	8.35709	12.9404	0.630812	2.21238	5e-05	0.000441468	yes
XLOC_011377	XLOC_011377	CABZ01066502.1	chr16:57894802 57904520	wt	ele	OK	19.9507	30.8347	0.628112	2.4578	5e-05	0.000441468	yes
XLOC_030075	XLOC_030075	npr3	chr5:42878784 42926146	wt	ele	OK	7.90857	12.2206	0.62783	2.4573	5e-05	0.000441468	yes
XLOC_016295	XLOC_016295	ndc1	chr2:26725022 26738829	wt	ele	OK	15.7076	24.2544	0.626781	2.51348	5e-05	0.000441468	yes
XLOC_035807	XLOC_035807	itm2bb	chr9:26364249 26379928	wt	ele	OK	51.3043	79.2019	0.626456	2.69255	5e-05	0.000441468	yes
XLOC_022644	XLOC_022644	zic1	chr24:5050130 5053543	wt	ele	OK	24.1257	37.2402	0.626291	2.67886	5e-05	0.000441468	yes
XLOC_034358	XLOC_034358	slc38a5a	chr8:26462958 26478746	wt	ele	OK	8.10348	12.4998	0.62529	2.53235	5e-05	0.000441468	yes
XLOC_017062	XLOC_017062	prdx6	chr20:15170288 15190620	wt	ele	OK	46.4406	71.4899	0.622352	3.13997	5e-05	0.000441468	yes
XLOC_036685	XLOC_036685	CD99L2	chr9:57815818 57861010	wt	ele	OK	22.5209	34.6517	0.621662	2.69763	5e-05	0.000441468	yes
XLOC_002491	XLOC_002491	capn9	chr1:54448597 54473846	wt	ele	OK	18.2199	28.0257	0.62124	2.777	5e-05	0.000441468	yes
XLOC_010776	XLOC_010776	rpa2	chr16:5691315 5714695	wt	ele	OK	39.9639	61.4144	0.619878	2.56841	5e-05	0.000441468	yes
XLOC_014009	XLOC_014009	kifc1	chr19:7613505 7623139	wt	ele	OK	35.3867	54.3715	0.619646	2.71817	5e-05	0.000441468	yes
XLOC_029735	XLOC_029735	CDCA2	chr5:16180122 16204553	wt	ele	OK	16.8561	25.8989	0.619622	2.66112	5e-05	0.000441468	yes
XLOC_021797	XLOC_021797	si:dkey 157g16.6	chr23:27375507 27476291	wt	ele	OK	27.474	42.1426	0.617214	2.55302	5e-05	0.000441468	yes
XLOC_031838	XLOC_031838	TEX264 fancd2	chr6:42077035 42268405	wt	ele	OK	13.8207	21.1914	0.616648	2.29317	5e-05	0.000441468	yes
XLOC_025372	XLOC_025372	mcm5	chr3:27017514 27035705	wt	ele	OK	51.3714	78.7535	0.616379	2.42667	5e-05	0.000441468	yes
XLOC_034407	XLOC_034407	zgc:100919	chr8:30574661 30582993	wt	ele	OK	33.3826	51.1709	0.616228	2.95718	5e-05	0.000441468	yes
XLOC_023003	XLOC_023003	SLC17A7	chr24:40063513 40110317	wt	ele	OK	1.86375	2.85548	0.615521	2.27614	5e-05	0.000441468	yes
XLOC_023792	XLOC_023792	cry3	chr25:14121189 14124521	wt	ele	OK	20.3608	31.1508	0.613476	2.76571	5e-05	0.000441468	yes
XLOC_036612	XLOC_036612	phgdh	chr9:49173470 49201766	wt	ele	OK	70.6478	107.859	0.610427	2.51803	5e-05	0.000441468	yes
XLOC_011800	XLOC_011800	KIF20B	chr17:23300869 23339120	wt	ele	OK	5.84183	8.91834	0.610354	2.5136	5e-05	0.000441468	yes
XLOC_006664	XLOC_006664	msxc	chr13:24850126 24888558	wt	ele	OK	16.6076	25.344	0.609804	2.48785	5e-05	0.000441468	yes
XLOC_010807	XLOC_010807	trim71	chr16:8962060 9012242	wt	ele	OK	9.68582	14.78	0.609702	2.64135	5e-05	0.000441468	yes
XLOC_002063	XLOC_002063	DLC1	chr1:14017726 14055939	wt	ele	OK	7.26459	11.0791	0.608889	2.54397	5e-05	0.000441468	yes
XLOC_029978	XLOC_029978	zgc:55461	chr5:34636661 34639912	wt	ele	OK	36.9361	56.3238	0.608711	2.93156	5e-05	0.000441468	yes
XLOC_019173	XLOC_019173	cbr1l	chr21:20520406 20528388	wt	ele	OK	18.8036	28.6716	0.608613	2.68241	5e-05	0.000441468	yes
XLOC_000086	XLOC_000086		Zv9_NA237:11508 31980	wt	ele	OK	54.2178	82.6487	0.608225	2.7755	5e-05	0.000441468	yes
XLOC_018602	XLOC_018602	efna5a	chr21:19316536 19464692	wt	ele	OK	7.98306	12.1536	0.606366	2.54351	5e-05	0.000441468	yes
XLOC_005957	XLOC_005957	dlgap5	chr12:18687615 18723232	wt	ele	OK	33.8422	51.4154	0.603379	2.6346	5e-05	0.000441468	yes
XLOC_020534	XLOC_020534	si:ch1073 396h14.1	chr22:15791192 15839308	wt	ele	OK	4.78617	7.26591	0.602271	2.15762	5e-05	0.000441468	yes
XLOC_019077	XLOC_019077	clica	chr21:11865752 11874292	wt	ele	OK	14.0883	21.352	0.59987	2.22767	5e-05	0.000441468	yes
XLOC_032823	XLOC_032823	SLC22A31	chr7:57690263 57732027	wt	ele	OK	5.89287	8.92894	0.599518	2.34648	5e-05	0.000441468	yes
XLOC_031965	XLOC_031965	ddx27	chr6:57386389 57426539	wt	ele	OK	12.7967	19.3723	0.598225	2.60217	5e-05	0.000441468	yes
XLOC_035752	XLOC_035752	zgc:162944	chr9:22860068 22864933	wt	ele	OK	45.1535	68.2949	0.59694	2.45313	5e-05	0.000441468	yes
XLOC_023846	XLOC_023846	dusp6	chr25:18813587 18817793	wt	ele	OK	28.2647	42.7369	0.596483	2.60949	5e-05	0.000441468	yes
XLOC_009459	XLOC_009459	rhoub	chr15:9125892 9137473	wt	ele	OK	8.55933	12.9203	0.594065	2.36139	5e-05	0.000441468	yes
XLOC_014970	XLOC_014970	chrac1	chr19:42487707 42490853	wt	ele	OK	32.2532	48.6174	0.59203	2.85212	5e-05	0.000441468	yes
XLOC_023244	XLOC_023244	pla2g15	chr25:5079931 5093956	wt	ele	OK	46.0804	69.3841	0.59045	2.5539	5e-05	0.000441468	yes
XLOC_025105	XLOC_025105	MYH9	chr3:5725969 5826565	wt	ele	OK	57.0093	85.7815	0.589468	2.46016	5e-05	0.000441468	yes
XLOC_030917	XLOC_030917	mcm6	chr6:12880020 12897310	wt	ele	OK	46.7153	70.0666	0.584832	2.67071	5e-05	0.000441468	yes
XLOC_011247	XLOC_011247	fbl	chr16:44947118 44955553	wt	ele	OK	87.2269	130.336	0.579395	2.55285	5e-05	0.000441468	yes
XLOC_028947	XLOC_028947	prps1a	chr5:24805237 24816602	wt	ele	OK	78.1978	116.486	0.574958	2.48359	5e-05	0.000441468	yes
XLOC_011186	XLOC_011186	scmh1	chr16:39528908 39560210	wt	ele	OK	10.7292	15.9767	0.574417	2.34014	5e-05	0.000441468	yes
XLOC_018708	XLOC_018708	adssl	chr21:25916057 25925022	wt	ele	OK	32.8576	48.818	0.571187	2.43588	5e-05	0.000441468	yes
XLOC_008415	XLOC_008415	ssrp1a	chr14:22983712 23018499	wt	ele	OK	44.1428	65.4978	0.56927	2.49783	5e-05	0.000441468	yes
XLOC_008514	XLOC_008514	zic3	chr14:32881567 32886494	wt	ele	OK	14.0586	20.809	0.565749	2.54058	5e-05	0.000441468	yes
XLOC_030429	XLOC_030429	gsnb	chr5:66488817 66519328	wt	ele	OK	37.215	55.0622	0.565178	2.44586	5e-05	0.000441468	yes
XLOC_013553	XLOC_013553	kif23	chr18:20217002 20239123	wt	ele	OK	25.8341	38.2139	0.564822	2.20093	5e-05	0.000441468	yes
XLOC_003040	XLOC_003040	npm1a	chr10:22234686 22245329	wt	ele	OK	119.033	175.772	0.562343	2.41384	5e-05	0.000441468	yes
XLOC_010854	XLOC_010854	si:ch211 69g19.2	chr16:13802312 13810800	wt	ele	OK	57.1154	84.3119	0.561858	2.4581	5e-05	0.000441468	yes
XLOC_020680	XLOC_020680	capn2l	chr22:27178582 27208528	wt	ele	OK	20.147	29.6756	0.558712	2.52591	5e-05	0.000441468	yes
XLOC_035880	XLOC_035880	hspe1	chr9:33334324 33338315	wt	ele	OK	189.57	277.779	0.55121	2.34865	5e-05	0.000441468	yes
XLOC_021404	XLOC_021404	CABZ01070579.1	chr23:38339071 38356744	wt	ele	OK	12.334	18.0265	0.547478	2.25924	5e-05	0.000441468	yes
XLOC_020222	XLOC_020222	fetub	chr22:40848166 40858664	wt	ele	OK	229.499	335.404	0.547414	2.22038	5e-05	0.000441468	yes
XLOC_031741	XLOC_031741	her6	chr6:36329654 36332018	wt	ele	OK	35.1701	51.3783	0.546809	2.20071	5e-05	0.000441468	yes
XLOC_026412	XLOC_026412	gstp1	chr4:29632401 29639074	wt	ele	OK	325.883	476.005	0.546626	2.96042	5e-05	0.000441468	yes
XLOC_005833	XLOC_005833	kif22	chr12:5786158 5809951	wt	ele	OK	32.1368	46.9028	0.545446	2.38201	5e-05	0.000441468	yes
XLOC_007299	XLOC_007299	zgc:163030	chr13:33894410 33896169	wt	ele	OK	53.5321	78.0247	0.543527	2.19293	5e-05	0.000441468	yes
XLOC_032664	XLOC_032664	sall1a	chr7:38763524 38782878	wt	ele	OK	11.2619	16.3767	0.540193	2.33355	5e-05	0.000441468	yes
XLOC_030817	XLOC_030817	ssb	chr6:3528694 3540315	wt	ele	OK	41.1224	59.6085	0.535596	2.34938	5e-05	0.000441468	yes
XLOC_005280	XLOC_005280	reep3	chr12:9576918 9636388	wt	ele	OK	26.665	38.6312	0.53482	2.26827	5e-05	0.000441468	yes
XLOC_021716	XLOC_021716	tkt	chr23:20401927 20414807	wt	ele	OK	84.1418	121.698	0.532408	2.25716	5e-05	0.000441468	yes
XLOC_015253	XLOC_015253	aqp1a.1	chr2:2888642 2900295	wt	ele	OK	55.9419	80.4555	0.524262	2.64975	5e-05	0.000441468	yes
XLOC_014546	XLOC_014546	zgc:109868	chr19:5974114 5976185	wt	ele	OK	53.6279	76.7126	0.516482	2.20024	5e-05	0.000441468	yes
XLOC_012428	XLOC_012428	g2e3	chr17:28857834 28870857	wt	ele	OK	16.0131	22.7264	0.505118	2.13432	5e-05	0.000441468	yes
XLOC_033116	XLOC_033116	zgc:112234 zgc:195633	chr7:7267023 7269705	wt	ele	OK	0.130331	37.5061	8.16879	2.77351	0.0001	0.000822847	yes
XLOC_033862	XLOC_033862		chr7:9156436 9160264	wt	ele	OK	0.0715779	1.1239	3.97286	4.50179	0.0001	0.000822847	yes
XLOC_027348	XLOC_027348	si:ch211 92l17.1	chr4:14671224 14884284	wt	ele	OK	1.08886	15.9793	3.87531	2.83769	0.0001	0.000822847	yes
XLOC_031591	XLOC_031591		chr6:19467120 19469919	wt	ele	OK	0.198847	2.49587	3.64981	3.25605	0.0001	0.000822847	yes
XLOC_031459	XLOC_031459	CABZ01081674.1	chr6:7783748 7801730	wt	ele	OK	0.247628	2.47049	3.31855	1.85269	0.0001	0.000822847	yes
XLOC_026999	XLOC_026999	si:dkey 196n19.2	chr4:55706443 55750936	wt	ele	OK	0.0734422	0.70621	3.26542	2.91924	0.0001	0.000822847	yes
XLOC_001849	XLOC_001849	si:dkey 156m2.5	chr1:58347095 58355615	wt	ele	OK	0.111573	1.04997	3.23429	3.43199	0.0001	0.000822847	yes
XLOC_000382	XLOC_000382		Zv9_NA668:11175 12747	wt	ele	OK	0.335845	2.26024	2.7506	4.04026	0.0001	0.000822847	yes
XLOC_001282	XLOC_001282	BX569798.1	chr1:10841140 10870656	wt	ele	OK	0.50787	3.32536	2.71098	2.99936	0.0001	0.000822847	yes
XLOC_033916	XLOC_033916		chr7:27190529 27191604	wt	ele	OK	0.518594	3.3347	2.68488	4.14867	0.0001	0.000822847	yes
XLOC_032511	XLOC_032511		chr7:25740830 25749106	wt	ele	OK	0.275489	1.66373	2.59435	2.94606	0.0001	0.000822847	yes
XLOC_027084	XLOC_027084	FP015791.1	chr4:60819689 60827150	wt	ele	OK	0.786529	4.38362	2.47855	4.01364	0.0001	0.000822847	yes
XLOC_035318	XLOC_035318	PRKACB	chr8:53175954 53208476	wt	ele	OK	0.282088	1.53529	2.4443	2.73813	0.0001	0.000822847	yes
XLOC_006285	XLOC_006285		chr12:9277881 9279152	wt	ele	OK	0.574894	2.4006	2.06203	3.30297	0.0001	0.000822847	yes
XLOC_025839	XLOC_025839		chr3:4108861 4112656	wt	ele	OK	0.254507	1.04901	2.04326	3.25601	0.0001	0.000822847	yes
XLOC_001877	XLOC_001877	si:dkey 222h21.4 si:dkey 222h21.5 si:dkey 222h21.6	chr1:58977302 59003323	wt	ele	OK	0.198191	0.75641	1.93227	2.51838	0.0001	0.000822847	yes
XLOC_035606	XLOC_035606	si:ch211 121j5.2	chr9:7257465 7264026	wt	ele	OK	0.842964	3.13955	1.89701	3.25397	0.0001	0.000822847	yes
XLOC_004691	XLOC_004691	CU459095.1	chr11:14672369 14882992	wt	ele	OK	0.48954	1.77838	1.86106	2.55132	0.0001	0.000822847	yes
XLOC_016200	XLOC_016200	si:ch211 153l6.4	chr2:18957773 18983437	wt	ele	OK	1.08894	3.91492	1.84606	2.71902	0.0001	0.000822847	yes
XLOC_003452	XLOC_003452	mir219 1	chr10:10278919 10298323	wt	ele	OK	2.16915	7.25217	1.74128	2.1516	0.0001	0.000822847	yes
XLOC_017562	XLOC_017562	gabrr2b	chr20:1181445 1197575	wt	ele	OK	0.661421	2.13136	1.68813	2.70805	0.0001	0.000822847	yes
XLOC_033880	XLOC_033880		chr7:16938222 16941883	wt	ele	OK	0.371946	1.17802	1.66319	3.01293	0.0001	0.000822847	yes
XLOC_028280	XLOC_028280	zgc:174642	chr4:53909610 53916379	wt	ele	OK	0.549741	1.72013	1.6457	2.34682	0.0001	0.000822847	yes
XLOC_004753	XLOC_004753	slc4a5	chr11:21372645 21460551	wt	ele	OK	0.262915	0.817557	1.63672	2.33901	0.0001	0.000822847	yes
XLOC_034394	XLOC_034394	fam212b	chr8:29096168 29120475	wt	ele	OK	2.99773	9.2325	1.62285	2.57732	0.0001	0.000822847	yes
XLOC_035976	XLOC_035976	si:dkey 95p16.2	chr9:41758654 41919526	wt	ele	OK	45.4962	136.866	1.58894	3.33984	0.0001	0.000822847	yes
XLOC_017911	XLOC_017911	si:ch211 63o20.10	chr20:34671883 34675241	wt	ele	OK	1.52612	4.36875	1.51735	2.59816	0.0001	0.000822847	yes
XLOC_004745	XLOC_004745	ogfrl2	chr11:20511781 20518122	wt	ele	OK	0.49799	1.42437	1.51613	2.22181	0.0001	0.000822847	yes
XLOC_011560	XLOC_011560	CABZ01073071.2	chr17:29354 30546	wt	ele	OK	7.99521	22.5719	1.49732	5.46956	0.0001	0.000822847	yes
XLOC_007234	XLOC_007234	cdhr1a	chr13:29704257 29729438	wt	ele	OK	0.360448	1.01081	1.48766	2.37235	0.0001	0.000822847	yes
XLOC_013753	XLOC_013753	kcnj1a.6	chr18:47054459 47056563	wt	ele	OK	0.86786	2.37526	1.45255	2.33611	0.0001	0.000822847	yes
XLOC_007118	XLOC_007118	bhik	chr13:15534559 15622692	wt	ele	OK	7.86529	19.611	1.31809	2.98653	0.0001	0.000822847	yes
XLOC_005320	XLOC_005320	irf9	chr12:14388714 14412927	wt	ele	OK	2.72087	6.73383	1.30736	2.38157	0.0001	0.000822847	yes
XLOC_020360	XLOC_020360	si:rp71 36a1.1	chr22:5832682 5842775	wt	ele	OK	1.89477	4.55228	1.26456	2.50307	0.0001	0.000822847	yes
XLOC_026548	XLOC_026548	si:ch211 229l10.10	chr4:37927052 37933631	wt	ele	OK	1.91266	4.56463	1.25492	2.29892	0.0001	0.000822847	yes
XLOC_010423	XLOC_010423	glipr2l	chr16:29843227 29850422	wt	ele	OK	2.27612	5.41903	1.25146	3.15672	0.0001	0.000822847	yes
XLOC_000626	XLOC_000626		Zv9_NA92:5822 17558	wt	ele	OK	1.44872	3.40347	1.23222	2.85017	0.0001	0.000822847	yes
XLOC_036038	XLOC_036038	CABZ01083696.1	chr9:51364353 51499700	wt	ele	OK	1.13027	2.45046	1.11639	2.27806	0.0001	0.000822847	yes
XLOC_008898	XLOC_008898	RNF14	chr15:3635133 3645721	wt	ele	OK	0.726304	1.57229	1.11422	2.21853	0.0001	0.000822847	yes
XLOC_012172	XLOC_012172	si:ch73 340m8.2	chr17:5589343 5621997	wt	ele	OK	1.31054	2.78601	1.08804	2.31411	0.0001	0.000822847	yes
XLOC_010836	XLOC_010836	CEP192	chr16:11691160 11878578	wt	ele	OK	4.5067	9.50806	1.07708	2.62849	0.0001	0.000822847	yes
XLOC_021203	XLOC_021203	dhrs3a	chr23:21957772 21968821	wt	ele	OK	2.99398	6.20768	1.05199	3.04532	0.0001	0.000822847	yes
XLOC_034428	XLOC_034428	derl3	chr8:31769444 31777680	wt	ele	OK	2.47053	5.12054	1.05148	2.83285	0.0001	0.000822847	yes
XLOC_024401	XLOC_024401		chr3:13949169 13981083	wt	ele	OK	5.65104	11.5694	1.03372	2.52054	0.0001	0.000822847	yes
XLOC_009325	XLOC_009325	KIAA1731	chr15:118416 120824	wt	ele	OK	10.1857	20.583	1.01491	2.32373	0.0001	0.000822847	yes
XLOC_033204	XLOC_033204	btr04 btr06	chr7:16941961 16980218	wt	ele	OK	5.91685	11.5557	0.965699	2.6317	0.0001	0.000822847	yes
XLOC_010531	XLOC_010531	map7d1a	chr16:39984863 40095968	wt	ele	OK	5.65142	10.9892	0.959397	2.19801	0.0001	0.000822847	yes
XLOC_036088	XLOC_036088		chr9:57919877 57950580	wt	ele	OK	3.17591	6.07725	0.936248	2.52967	0.0001	0.000822847	yes
XLOC_027586	XLOC_027586	zgc:171626	chr4:31273069 31281817	wt	ele	OK	1.95743	3.74375	0.935524	2.37386	0.0001	0.000822847	yes
XLOC_004822	XLOC_004822	CASS4	chr11:28620058 28655621	wt	ele	OK	1.44863	2.73995	0.919465	2.36536	0.0001	0.000822847	yes
XLOC_024116	XLOC_024116		chr25:3730985 3731369	wt	ele	OK	26.4298	49.4937	0.905078	4.49067	0.0001	0.000822847	yes
XLOC_023709	XLOC_023709	pidd	chr25:4723102 4754166	wt	ele	OK	1.22036	2.28277	0.903476	2.28253	0.0001	0.000822847	yes
XLOC_017712	XLOC_017712	si:dkey 5n18.1	chr20:17080254 17082377	wt	ele	OK	8.42313	15.4782	0.877808	2.99283	0.0001	0.000822847	yes
XLOC_029155	XLOC_029155	cdc42ep2	chr5:39313743 39335914	wt	ele	OK	4.79868	8.57012	0.836679	2.33031	0.0001	0.000822847	yes
XLOC_013244	XLOC_013244	tsen34	chr18:39882843 39887688	wt	ele	OK	4.89202	8.71186	0.832551	2.21856	0.0001	0.000822847	yes
XLOC_017913	XLOC_017913	si:ch211 63o20.7	chr20:34727017 34758981	wt	ele	OK	3.56025	6.29374	0.821939	2.38546	0.0001	0.000822847	yes
XLOC_032805	XLOC_032805	ccnd1	chr7:54575138 54584737	wt	ele	OK	76.2381	131.738	0.789089	2.50166	0.0001	0.000822847	yes
XLOC_015010	XLOC_015010	sesn2	chr19:45226142 45242485	wt	ele	OK	7.83298	13.4179	0.776522	2.28346	0.0001	0.000822847	yes
XLOC_020779	XLOC_020779	arhgap19	chr22:37796304 37818548	wt	ele	OK	12.353	21.134	0.774704	2.1994	0.0001	0.000822847	yes
XLOC_009865	XLOC_009865		chr15:45714881 45721801	wt	ele	OK	17.0587	28.9091	0.761018	3.1427	0.0001	0.000822847	yes
XLOC_017430	XLOC_017430	flvcr2b	chr20:46562238 46600087	wt	ele	OK	3.07662	5.19435	0.755598	2.22317	0.0001	0.000822847	yes
XLOC_017893	XLOC_017893	rock2b	chr20:33595779 33729816	wt	ele	OK	9.50277	16.0252	0.753918	2.47673	0.0001	0.000822847	yes
XLOC_008417	XLOC_008417	PMF1	chr14:23112440 23116613	wt	ele	OK	13.2723	22.3616	0.752609	2.33092	0.0001	0.000822847	yes
XLOC_023866	XLOC_023866	GTSE1	chr25:20084371 20098520	wt	ele	OK	11.215	18.8839	0.751724	2.37668	0.0001	0.000822847	yes
XLOC_024725	XLOC_024725	dus1l	chr3:36221906 36232061	wt	ele	OK	6.31864	10.6268	0.750022	2.18847	0.0001	0.000822847	yes
XLOC_033480	XLOC_033480	lpcat2	chr7:36840731 36863298	wt	ele	OK	4.785	8.00315	0.742048	2.28689	0.0001	0.000822847	yes
XLOC_019142	XLOC_019142	ppp1r3b	chr21:18744330 18747809	wt	ele	OK	11.6219	19.3649	0.736597	2.29949	0.0001	0.000822847	yes
XLOC_029380	XLOC_029380	alad	chr5:62950449 62964793	wt	ele	OK	16.6844	27.6937	0.731058	2.38089	0.0001	0.000822847	yes
XLOC_014099	XLOC_014099	adck5	chr19:12478598 12518879	wt	ele	OK	4.19244	6.89792	0.718373	2.29742	0.0001	0.000822847	yes
XLOC_023349	XLOC_023349	zgc:86725	chr25:14370302 14386174	wt	ele	OK	8.8081	14.4215	0.711318	2.58526	0.0001	0.000822847	yes
XLOC_035739	XLOC_035739	ska3	chr9:22293164 22299777	wt	ele	OK	11.448	18.741	0.711096	2.43229	0.0001	0.000822847	yes
XLOC_031214	XLOC_031214	rad18	chr6:41739536 41818262	wt	ele	OK	7.6947	12.5803	0.709234	2.38466	0.0001	0.000822847	yes
XLOC_021630	XLOC_021630	ndnl2	chr23:13012413 13025121	wt	ele	OK	14.2112	23.1609	0.704658	2.41012	0.0001	0.000822847	yes
XLOC_029825	XLOC_029825	acsl4l	chr5:25187333 25244173	wt	ele	OK	3.05376	4.96851	0.702226	2.30151	0.0001	0.000822847	yes
XLOC_003078	XLOC_003078	tpte	chr10:25121729 25139152	wt	ele	OK	16.7805	27.124	0.692782	2.50589	0.0001	0.000822847	yes
XLOC_028505	XLOC_028505		chr4:26154665 26167134	wt	ele	OK	1.27711	2.05824	0.68853	2.49236	0.0001	0.000822847	yes
XLOC_031850	XLOC_031850	trnt1	chr6:43155141 43165000	wt	ele	OK	6.47552	10.4352	0.688386	2.27008	0.0001	0.000822847	yes
XLOC_002938	XLOC_002938	thop1	chr10:15437153 15476159	wt	ele	OK	6.03397	9.71757	0.687488	2.31263	0.0001	0.000822847	yes
XLOC_032879	XLOC_032879	ARAP2	chr7:64259666 64475182	wt	ele	OK	1.54484	2.47117	0.67774	2.29714	0.0001	0.000822847	yes
XLOC_015696	XLOC_015696	RNaseP_nuc parp2 rpph1	chr2:37536495 37585260	wt	ele	OK	16.9406	26.9299	0.668725	2.22602	0.0001	0.000822847	yes
XLOC_001460	XLOC_001460	si:dkey 18j14.5	chr1:29910225 29914182	wt	ele	OK	2.86851	4.52309	0.657003	2.25877	0.0001	0.000822847	yes
XLOC_005496	XLOC_005496	sost	chr12:28902354 28906683	wt	ele	OK	7.699	12.0355	0.644551	2.51608	0.0001	0.000822847	yes
XLOC_006718	XLOC_006718	unc5b	chr13:29351683 29453528	wt	ele	OK	4.85032	7.55248	0.638872	2.20488	0.0001	0.000822847	yes
XLOC_034345	XLOC_034345	sypl2b	chr8:25932412 25943401	wt	ele	OK	7.7407	12.0509	0.638609	2.4496	0.0001	0.000822847	yes
XLOC_014849	XLOC_014849	irx1b	chr19:28613318 28622965	wt	ele	OK	9.53312	14.6511	0.61999	2.17157	0.0001	0.000822847	yes
XLOC_033523	XLOC_033523	dnajb6b	chr7:41931262 41971406	wt	ele	OK	12.0317	18.4651	0.617963	2.21116	0.0001	0.000822847	yes
XLOC_015479	XLOC_015479	amotl2b	chr2:22309475 22318822	wt	ele	OK	6.10272	9.29132	0.606431	2.22306	0.0001	0.000822847	yes
XLOC_023581	XLOC_023581	CU302436.1	chr25:36080840 36101828	wt	ele	OK	2.39743	3.64826	0.605718	2.24797	0.0001	0.000822847	yes
XLOC_028633	XLOC_028633		chr4:48075279 48075544	wt	ele	OK	196.455	298.03	0.60126	6.08013	0.0001	0.000822847	yes
XLOC_016323	XLOC_016323	paxip1	chr2:29617507 29638235	wt	ele	OK	14.2539	21.4702	0.590982	2.5322	0.0001	0.000822847	yes
XLOC_035048	XLOC_035048	cebpb	chr8:29301376 29302892	wt	ele	OK	18.7019	27.8003	0.571915	2.53788	0.0001	0.000822847	yes
XLOC_009504	XLOC_009504	nxn	chr15:15212823 15342765	wt	ele	OK	14.712	21.748	0.563891	2.31208	0.0001	0.000822847	yes
XLOC_025612	XLOC_025612	zgc:100868	chr3:39467969 39483264	wt	ele	OK	17.5785	25.9564	0.562278	2.33033	0.0001	0.000822847	yes
XLOC_007115	XLOC_007115	cdc25	chr13:14776346 14808968	wt	ele	OK	17.359	25.4269	0.550668	2.21207	0.0001	0.000822847	yes
XLOC_023736	XLOC_023736	arpp19b	chr25:7917285 7926992	wt	ele	OK	48.894	71.3892	0.546049	2.30637	0.0001	0.000822847	yes
XLOC_002609	XLOC_002609	DNM2	chr1:59697173 59722839	wt	ele	OK	13.5202	19.7259	0.544975	2.16977	0.0001	0.000822847	yes
XLOC_014879	XLOC_014879	rbb4	chr19:32243948 32252815	wt	ele	OK	161.22	234.919	0.543138	2.21122	0.0001	0.000822847	yes
XLOC_018793	XLOC_018793	rars	chr21:34293144 34344138	wt	ele	OK	22.7067	33.0637	0.542126	2.27878	0.0001	0.000822847	yes
XLOC_007979	XLOC_007979	GM2A	chr14:27238761 27247721	wt	ele	OK	4.8167	6.98439	0.536091	2.19027	0.0001	0.000822847	yes
XLOC_016980	XLOC_016980	ENSDARG00000040719	chr20:4300326 4380341	wt	ele	OK	7.21058	10.4129	0.530182	2.18828	0.0001	0.000822847	yes
XLOC_008308	XLOC_008308	SH3BGRL	chr14:9577243 9593102	wt	ele	OK	16.2364	23.4049	0.527582	2.25557	0.0001	0.000822847	yes
XLOC_002485	XLOC_002485	xpo1a	chr1:54219549 54245710	wt	ele	OK	33.5628	47.9074	0.513383	2.20774	0.0001	0.000822847	yes
XLOC_013669	XLOC_013669	yap1	chr18:35623586 35695528	wt	ele	OK	30.5159	43.5314	0.512496	2.27754	0.0001	0.000822847	yes
XLOC_017239	XLOC_017239	nhsl1b	chr20:30751248 30917077	wt	ele	OK	10.7761	15.293	0.505034	2.19097	0.0001	0.000822847	yes
XLOC_008632	XLOC_008632	ehd1a	chr14:48374809 48406051	wt	ele	OK	18.0528	25.5417	0.500633	2.13405	0.0001	0.000822847	yes
XLOC_008496	XLOC_008496	gpc4	chr14:31959983 32021675	wt	ele	OK	22.4653	31.4805	0.486757	2.0723	0.0001	0.000822847	yes
XLOC_003115	XLOC_003115	ehd1b	chr10:27703743 27728527	wt	ele	OK	26.9697	37.7554	0.485344	2.2621	0.0001	0.000822847	yes
XLOC_024041	XLOC_024041	hist2h3c	chr25:36211444 36212266	wt	ele	OK	0.428463	24.857	5.85834	8.07717	0.00015	0.00117124	yes
XLOC_034449	XLOC_034449	RBBP6	chr8:35264282 35265416	wt	ele	OK	0.719148	22.9325	4.99496	7.86856	0.00015	0.00117124	yes
XLOC_005822	XLOC_005822	CABZ01030119.1	chr12:5161430 5168973	wt	ele	OK	0.0720507	0.996599	3.78993	2.60324	0.00015	0.00117124	yes
XLOC_024126	XLOC_024126		chr25:9883148 9884078	wt	ele	OK	0.442247	4.29511	3.27977	4.36302	0.00015	0.00117124	yes
XLOC_000377	XLOC_000377		Zv9_NA668:23352 25835	wt	ele	OK	0.150806	1.29108	3.09781	3.204	0.00015	0.00117124	yes
XLOC_015060	XLOC_015060		chr19:49920310 49925178	wt	ele	OK	0.172929	1.36606	2.98177	3.08923	0.00015	0.00117124	yes
XLOC_036093	XLOC_036093	CU639413.2	chr9:58131993 58148376	wt	ele	OK	0.155908	1.16984	2.90754	2.21341	0.00015	0.00117124	yes
XLOC_006278	XLOC_006278		chr12:2933908 2935484	wt	ele	OK	0.335524	1.96614	2.55088	3.71174	0.00015	0.00117124	yes
XLOC_006309	XLOC_006309		chr12:17562817 17563820	wt	ele	OK	0.769461	3.39631	2.14205	3.50172	0.00015	0.00117124	yes
XLOC_010658	XLOC_010658	notchl	chr16:51979221 52012501	wt	ele	OK	0.527259	2.22173	2.0751	2.88011	0.00015	0.00117124	yes
XLOC_022606	XLOC_022606	CDH7	chr24:35185 43166	wt	ele	OK	0.277137	1.04013	1.90809	2.23378	0.00015	0.00117124	yes
XLOC_017353	XLOC_017353	si:ch211 10j20.1 si:ch211 10j20.2 si:ch211 10j20.5 si:dkey 217m5.9	chr20:39419015 39522873	wt	ele	OK	0.232944	0.873082	1.90613	1.99936	0.00015	0.00117124	yes
XLOC_024626	XLOC_024626	mybpc2a	chr3:30400708 30468868	wt	ele	OK	0.246184	0.869022	1.81965	2.63356	0.00015	0.00117124	yes
XLOC_026950	XLOC_026950	si:dkey 193i10.3	chr4:51685592 51686985	wt	ele	OK	1.10029	3.69931	1.74938	3.23316	0.00015	0.00117124	yes
XLOC_026967	XLOC_026967	si:dkey 156k2.6	chr4:53335937 53347179	wt	ele	OK	0.51117	1.71132	1.74324	2.71261	0.00015	0.00117124	yes
XLOC_006473	XLOC_006473	tuba4l	chr13:6285076 6290337	wt	ele	OK	0.757504	2.49264	1.71835	3.11823	0.00015	0.00117124	yes
XLOC_033292	XLOC_033292	CU019646.2	chr7:21397518 21398924	wt	ele	OK	1.05079	3.08772	1.55507	2.89337	0.00015	0.00117124	yes
XLOC_013379	XLOC_013379	ENSDARG00000040013	chr18:4744509 4769473	wt	ele	OK	0.424846	1.21708	1.51841	2.43895	0.00015	0.00117124	yes
XLOC_026103	XLOC_026103	CU571169.1	chr4:5671389 5708367	wt	ele	OK	3.77406	10.4363	1.46742	2.72509	0.00015	0.00117124	yes
XLOC_011750	XLOC_011750	eno4	chr17:21120680 21198790	wt	ele	OK	0.972432	2.65524	1.44917	2.66271	0.00015	0.00117124	yes
XLOC_031614	XLOC_031614	znf326	chr6:21370288 21378274	wt	ele	OK	0.942018	2.38189	1.33828	2.42095	0.00015	0.00117124	yes
XLOC_024559	XLOC_024559	MKL1	chr3:24986070 25057771	wt	ele	OK	0.652194	1.62947	1.32103	2.60924	0.00015	0.00117124	yes
XLOC_010698	XLOC_010698	trip13	chr16:56452411 56517756	wt	ele	OK	6.7604	16.2264	1.26317	2.47634	0.00015	0.00117124	yes
XLOC_036492	XLOC_036492	si:ch211 125e6.8	chr9:34143776 34154996	wt	ele	OK	3.38913	7.95329	1.23064	2.1531	0.00015	0.00117124	yes
XLOC_025333	XLOC_025333	nfe2l1a	chr3:24362825 24384410	wt	ele	OK	0.745531	1.73537	1.2189	2.43661	0.00015	0.00117124	yes
XLOC_009275	XLOC_009275	CABZ01114098.1	chr15:43740023 43880951	wt	ele	OK	1.31132	3.02174	1.20436	2.27311	0.00015	0.00117124	yes
XLOC_021238	XLOC_021238	arhgap4a	chr23:25276725 25302880	wt	ele	OK	0.891476	2.05248	1.2031	2.55414	0.00015	0.00117124	yes
XLOC_018805	XLOC_018805	nsd1b	chr21:36679000 36724657	wt	ele	OK	1.43792	3.30673	1.20142	2.00211	0.00015	0.00117124	yes
XLOC_016000	XLOC_016000	dusp22b	chr2:1065669 1082702	wt	ele	OK	2.59593	5.70252	1.13535	2.35293	0.00015	0.00117124	yes
XLOC_002682	XLOC_002682		chr1:27792352 27796115	wt	ele	OK	0.593195	1.28065	1.1103	2.32773	0.00015	0.00117124	yes
XLOC_022350	XLOC_022350	CSPP1	chr24:19224526 19281840	wt	ele	OK	1.57505	3.35946	1.09283	2.31987	0.00015	0.00117124	yes
XLOC_020561	XLOC_020561	si:ch211 197g15.9	chr22:17684632 17687922	wt	ele	OK	1.35543	2.83536	1.06478	2.18732	0.00015	0.00117124	yes
XLOC_012997	XLOC_012997	chtf8	chr18:16680546 16696843	wt	ele	OK	5.69069	11.2913	0.988533	2.79841	0.00015	0.00117124	yes
XLOC_007026	XLOC_007026	tnfaip2b	chr13:6779767 6791402	wt	ele	OK	4.30557	8.5281	0.986022	2.2422	0.00015	0.00117124	yes
XLOC_029285	XLOC_029285	msh3	chr5:52934994 53311893	wt	ele	OK	0.992856	1.93966	0.966147	2.17262	0.00015	0.00117124	yes
XLOC_022732	XLOC_022732	rttn	chr24:15036260 15167226	wt	ele	OK	1.61761	3.16013	0.966123	2.52257	0.00015	0.00117124	yes
XLOC_008624	XLOC_008624		chr14:46992022 46995432	wt	ele	OK	4.46565	8.23732	0.883305	2.70779	0.00015	0.00117124	yes
XLOC_007456	XLOC_007456	msh6	chr13:49329285 49402601	wt	ele	OK	12.4905	22.7619	0.865782	2.276	0.00015	0.00117124	yes
XLOC_003306	XLOC_003306	fgfr1b	chr10:43954583 44028930	wt	ele	OK	6.17161	10.8502	0.813996	2.38549	0.00015	0.00117124	yes
XLOC_025613	XLOC_025613	BX640398.1	chr3:39611685 39622139	wt	ele	OK	0.923412	1.6155	0.806935	2.19174	0.00015	0.00117124	yes
XLOC_017496	XLOC_017496	si:dkey 235d18.5	chr20:52925927 53067403	wt	ele	OK	1.53068	2.67375	0.804695	2.47117	0.00015	0.00117124	yes
XLOC_032542	XLOC_032542	BX005022.1	chr7:27173900 27186381	wt	ele	OK	4.50037	7.61136	0.758109	2.25714	0.00015	0.00117124	yes
XLOC_004980	XLOC_004980	gli2b	chr11:44900468 45196292	wt	ele	OK	5.24352	8.82061	0.750343	2.35137	0.00015	0.00117124	yes
XLOC_009029	XLOC_009029	zgc:112083	chr15:18951710 18965512	wt	ele	OK	3.73657	6.21001	0.732881	2.18536	0.00015	0.00117124	yes
XLOC_013779	XLOC_013779	cd276	chr18:49297701 49386782	wt	ele	OK	21.1164	34.9979	0.728904	2.49019	0.00015	0.00117124	yes
XLOC_013496	XLOC_013496	ampd3b	chr18:16421560 16455985	wt	ele	OK	3.49772	5.79029	0.72722	2.0784	0.00015	0.00117124	yes
XLOC_002606	XLOC_002606	sid4	chr1:59519115 59528888	wt	ele	OK	8.86977	14.6616	0.725079	2.79774	0.00015	0.00117124	yes
XLOC_020340	XLOC_020340	rx1	chr22:4640466 4648012	wt	ele	OK	4.49905	7.33738	0.705645	2.34654	0.00015	0.00117124	yes
XLOC_019502	XLOC_019502		chr21:7302882 7310352	wt	ele	OK	2.59704	4.19301	0.691119	2.51082	0.00015	0.00117124	yes
XLOC_014032	XLOC_014032	cgnb	chr19:8259471 8302604	wt	ele	OK	3.09933	4.94623	0.674372	2.28818	0.00015	0.00117124	yes
XLOC_032417	XLOC_032417	FOCAD	chr7:19993066 20194654	wt	ele	OK	3.75988	5.98152	0.669826	2.15463	0.00015	0.00117124	yes
XLOC_013925	XLOC_013925	nrm	chr19:794911 800979	wt	ele	OK	3.05672	4.80399	0.65225	2.26527	0.00015	0.00117124	yes
XLOC_006424	XLOC_006424	wdr92	chr13:1003648 1013858	wt	ele	OK	7.73715	12.1589	0.652141	2.18265	0.00015	0.00117124	yes
XLOC_024229	XLOC_024229	CU672266.1 triobp	chr3:1936342 1953635	wt	ele	OK	7.33641	11.1784	0.607572	2.15283	0.00015	0.00117124	yes
XLOC_010734	XLOC_010734	NCOA7	chr16:58584043 58600409	wt	ele	OK	6.12094	9.31388	0.60563	2.39831	0.00015	0.00117124	yes
XLOC_011094	XLOC_011094	lmna	chr16:32824414 32867877	wt	ele	OK	5.71334	8.63188	0.59534	2.04737	0.00015	0.00117124	yes
XLOC_020567	XLOC_020567	gpx4a	chr22:17813694 17835829	wt	ele	OK	266.786	399.851	0.583779	2.83505	0.00015	0.00117124	yes
XLOC_006675	XLOC_006675	gsto2	chr13:25620785 25626662	wt	ele	OK	25.2819	37.588	0.572163	2.21674	0.00015	0.00117124	yes
XLOC_019144	XLOC_019144	PRC1	chr21:19138090 19150691	wt	ele	OK	17.2308	25.4601	0.563249	2.30447	0.00015	0.00117124	yes
XLOC_015275	XLOC_015275	gpt2l	chr2:4027399 4067295	wt	ele	OK	14.27	21.0411	0.560219	2.12624	0.00015	0.00117124	yes
XLOC_008284	XLOC_008284	CU467832.1	chr14:7708153 7712191	wt	ele	OK	12.9462	19.077	0.559302	2.11044	0.00015	0.00117124	yes
XLOC_011587	XLOC_011587	bub1bb	chr17:1507192 1529147	wt	ele	OK	8.97567	13.2084	0.557364	2.15592	0.00015	0.00117124	yes
XLOC_005460	XLOC_005460	gch2	chr12:26612193 26623897	wt	ele	OK	174.32	256.28	0.555986	2.42734	0.00015	0.00117124	yes
XLOC_005268	XLOC_005268	tfam	chr12:7926022 7935869	wt	ele	OK	21.9386	31.8444	0.537567	2.43225	0.00015	0.00117124	yes
XLOC_007277	XLOC_007277	rock2a	chr13:33038842 33122924	wt	ele	OK	11.602	16.6675	0.522667	2.27945	0.00015	0.00117124	yes
XLOC_034941	XLOC_034941	aldh9a1a.1	chr8:21633142 21641540	wt	ele	OK	115.711	164.973	0.511703	2.20714	0.00015	0.00117124	yes
XLOC_020276	XLOC_020276	bysl	chr22:525996 533134	wt	ele	OK	39.1592	55.6437	0.506868	2.4531	0.00015	0.00117124	yes
XLOC_014034	XLOC_014034	ubap2l	chr19:8380179 8420492	wt	ele	OK	20.0607	28.4449	0.503802	2.16431	0.00015	0.00117124	yes
XLOC_020526	XLOC_020526	si:ch211 181p13.2	chr22:14508353 14969181	wt	ele	OK	0.285356	3.44199	3.59241	2.97739	0.0002	0.00151135	yes
XLOC_020233	XLOC_020233	traf5	chr22:41260534 41281963	wt	ele	OK	0.313805	1.45708	2.21514	2.3178	0.0002	0.00151135	yes
XLOC_013879	XLOC_013879		chr18:43116834 43118898	wt	ele	OK	0.570668	2.07155	1.85999	2.88563	0.0002	0.00151135	yes
XLOC_034642	XLOC_034642	nkx3 1	chr8:52535761 52538280	wt	ele	OK	1.20744	4.24452	1.81365	2.33746	0.0002	0.00151135	yes
XLOC_003209	XLOC_003209	ucp3	chr10:37894302 37900774	wt	ele	OK	0.657837	2.13197	1.69639	2.49343	0.0002	0.00151135	yes
XLOC_010599	XLOC_010599	mir92b	chr16:45736462 45737340	wt	ele	OK	2.23345	6.67608	1.57973	1.99032	0.0002	0.00151135	yes
XLOC_013073	XLOC_013073	zgc:158868	chr18:21890089 21897089	wt	ele	OK	1.29886	3.84132	1.56435	2.50136	0.0002	0.00151135	yes
XLOC_021109	XLOC_021109	zgc:114081	chr23:16977926 16982445	wt	ele	OK	2.0317	5.5598	1.45235	2.54641	0.0002	0.00151135	yes
XLOC_000010	XLOC_000010		Zv9_NA110:3395 25537	wt	ele	OK	0.930326	2.53016	1.44342	2.5791	0.0002	0.00151135	yes
XLOC_013828	XLOC_013828		chr18:14348409 14350046	wt	ele	OK	0.907357	2.46565	1.44222	2.83253	0.0002	0.00151135	yes
XLOC_026673	XLOC_026673	BX936303.1	chr4:45524811 45531074	wt	ele	OK	1.35477	3.64398	1.42746	2.49454	0.0002	0.00151135	yes
XLOC_020141	XLOC_020141	si:dkeyp 86c4.1 zgc:174642	chr22:30827706 30883747	wt	ele	OK	1.36516	3.60219	1.3998	2.12421	0.0002	0.00151135	yes
XLOC_015537	XLOC_015537	si:dkeyp 7b3.1	chr2:24990340 24995543	wt	ele	OK	1.91182	4.74573	1.31169	2.38538	0.0002	0.00151135	yes
XLOC_031588	XLOC_031588	atad5b	chr6:19346305 19365609	wt	ele	OK	1.48695	3.53783	1.2505	2.27126	0.0002	0.00151135	yes
XLOC_026516	XLOC_026516	si:dkey 176f19.6	chr4:36108512 36115984	wt	ele	OK	0.840937	1.92516	1.19491	2.55047	0.0002	0.00151135	yes
XLOC_032167	XLOC_032167	CABZ01101003.1	chr7:1613071 1619104	wt	ele	OK	3.16529	6.80162	1.10354	2.20126	0.0002	0.00151135	yes
XLOC_020352	XLOC_020352	si:ch73 353p21.5	chr22:5606721 5637880	wt	ele	OK	6.0624	12.8717	1.08624	2.05189	0.0002	0.00151135	yes
XLOC_020511	XLOC_020511		chr22:13420368 13489532	wt	ele	OK	1.35177	2.8663	1.08435	2.56851	0.0002	0.00151135	yes
XLOC_011405	XLOC_011405		chr16:13623 14729	wt	ele	OK	3.10338	6.26285	1.01298	2.66959	0.0002	0.00151135	yes
XLOC_009791	XLOC_009791	CCDC150	chr15:39774842 39816421	wt	ele	OK	0.911039	1.81506	0.99443	2.31925	0.0002	0.00151135	yes
XLOC_007691	XLOC_007691		chr14:1757253 1768254	wt	ele	OK	4.95712	9.7398	0.974389	2.82155	0.0002	0.00151135	yes
XLOC_033274	XLOC_033274		chr7:20202918 20214548	wt	ele	OK	1.34974	2.64324	0.969623	2.32208	0.0002	0.00151135	yes
XLOC_012186	XLOC_012186	cenpo	chr17:6291901 6299775	wt	ele	OK	3.53303	6.74851	0.933662	2.62298	0.0002	0.00151135	yes
XLOC_031067	XLOC_031067	BX890577.1	chr6:27070550 27159321	wt	ele	OK	0.817556	1.47526	0.851579	2.28546	0.0002	0.00151135	yes
XLOC_035655	XLOC_035655	glb1l	chr9:13110645 13161437	wt	ele	OK	5.97356	10.4289	0.803931	2.33462	0.0002	0.00151135	yes
XLOC_024972	XLOC_024972	tsen54	chr3:61353769 61409029	wt	ele	OK	2.94747	5.05946	0.779508	2.11914	0.0002	0.00151135	yes
XLOC_011580	XLOC_011580	siva1	chr17:986636 995920	wt	ele	OK	14.2124	24.1609	0.765525	2.29775	0.0002	0.00151135	yes
XLOC_002360	XLOC_002360	cryba1l2	chr1:44877081 44890219	wt	ele	OK	5.44393	9.09151	0.739872	2.08063	0.0002	0.00151135	yes
XLOC_025794	XLOC_025794	foxj1a	chr3:61262544 61278874	wt	ele	OK	2.4645	4.10677	0.73671	2.4009	0.0002	0.00151135	yes
XLOC_001459	XLOC_001459	bora	chr1:29779636 29791053	wt	ele	OK	5.36463	8.9203	0.733613	2.14174	0.0002	0.00151135	yes
XLOC_036146	XLOC_036146	gpr155a	chr9:2477096 2513969	wt	ele	OK	2.96063	4.84797	0.711477	2.20432	0.0002	0.00151135	yes
XLOC_015708	XLOC_015708	dhrs1	chr2:37964505 37972433	wt	ele	OK	8.09884	13.1143	0.695352	2.5204	0.0002	0.00151135	yes
XLOC_022274	XLOC_022274	topbp1	chr24:9494727 9535847	wt	ele	OK	5.90786	9.3983	0.669765	2.32366	0.0002	0.00151135	yes
XLOC_006639	XLOC_006639	nfkb2	chr13:22857577 22875918	wt	ele	OK	7.20109	11.4511	0.669204	2.20329	0.0002	0.00151135	yes
XLOC_007809	XLOC_007809	hbegfa	chr14:7015234 7018245	wt	ele	OK	7.59698	12.048	0.665292	2.22082	0.0002	0.00151135	yes
XLOC_009505	XLOC_009505	txndc17	chr15:15347464 15352030	wt	ele	OK	20.8	32.9332	0.662959	2.92373	0.0002	0.00151135	yes
XLOC_035870	XLOC_035870	clybl	chr9:32201018 32292782	wt	ele	OK	7.30255	11.4641	0.65065	2.18419	0.0002	0.00151135	yes
XLOC_009244	XLOC_009244	TIAM1	chr15:40924436 41086477	wt	ele	OK	3.46434	5.36774	0.631732	2.20359	0.0002	0.00151135	yes
XLOC_005696	XLOC_005696	CABZ01103862.1	chr12:50293603 50301119	wt	ele	OK	6.86425	10.6301	0.630981	2.25274	0.0002	0.00151135	yes
XLOC_000110	XLOC_000110		Zv9_NA276:77009 82144	wt	ele	OK	6.40026	9.77541	0.611026	2.24664	0.0002	0.00151135	yes
XLOC_024800	XLOC_024800	mafk	chr3:43633656 43657818	wt	ele	OK	1.94922	2.93638	0.591143	1.99657	0.0002	0.00151135	yes
XLOC_031387	XLOC_031387	aurka	chr6:59788991 59803932	wt	ele	OK	23.8275	35.425	0.572141	2.21025	0.0002	0.00151135	yes
XLOC_023406	XLOC_023406	BX294110.1	chr25:19585310 19590621	wt	ele	OK	21.1935	30.9901	0.548189	2.15594	0.0002	0.00151135	yes
XLOC_001305	XLOC_001305	C1H4orf27	chr1:12905186 12911525	wt	ele	OK	17.0255	24.6636	0.534688	2.35719	0.0002	0.00151135	yes
XLOC_023397	XLOC_023397	cav1	chr25:19050765 19180696	wt	ele	OK	26.0443	37.7	0.533595	2.18029	0.0002	0.00151135	yes
XLOC_004263	XLOC_004263	ipo9	chr11:25785188 25810170	wt	ele	OK	17.9236	25.6069	0.514675	2.22363	0.0002	0.00151135	yes
XLOC_019060	XLOC_019060	nop56	chr21:10382565 10405532	wt	ele	OK	86.2116	122.876	0.51125	2.34205	0.0002	0.00151135	yes
XLOC_033481	XLOC_033481	mmp2	chr7:36864729 36887581	wt	ele	OK	51.9325	72.1976	0.475314	2.21461	0.0002	0.00151135	yes
XLOC_024214	XLOC_024214	TRIM35	chr3:1560731 1567706	wt	ele	OK	0.162842	1.55713	3.25734	2.96233	0.00025	0.00183251	yes
XLOC_032392	XLOC_032392	nitr3a nitr3b	chr7:18364472 18543233	wt	ele	OK	0.493003	4.18904	3.08695	1.9463	0.00025	0.00183251	yes
XLOC_010330	XLOC_010330	si:dkey 238m4.1	chr16:24702482 24765583	wt	ele	OK	0.497597	4.12606	3.05171	3.11053	0.00025	0.00183251	yes
XLOC_028691	XLOC_028691		chr4:58937751 58939910	wt	ele	OK	0.165059	1.28823	2.96433	3.58519	0.00025	0.00183251	yes
XLOC_026477	XLOC_026477	si:dkey 22h13.5	chr4:34151400 34171090	wt	ele	OK	1.0709	7.33634	2.77624	4.49875	0.00025	0.00183251	yes
XLOC_021509	XLOC_021509	btr32	chr23:46321045 46343413	wt	ele	OK	0.104905	0.71748	2.77385	2.87018	0.00025	0.00183251	yes
XLOC_019325	XLOC_019325	cd74b	chr21:32377027 32381287	wt	ele	OK	0.327129	1.993	2.60701	1.73617	0.00025	0.00183251	yes
XLOC_033939	XLOC_033939		chr7:47178736 47179826	wt	ele	OK	0.585893	3.48009	2.57042	3.94905	0.00025	0.00183251	yes
XLOC_001477	XLOC_001477	si:dkey 148e3.2	chr1:31471408 31472087	wt	ele	OK	1.40758	5.39161	1.9375	3.76202	0.00025	0.00183251	yes
XLOC_000779	XLOC_000779		Zv9_scaffold3459:247657 250210	wt	ele	OK	0.393429	1.2995	1.72378	2.89216	0.00025	0.00183251	yes
XLOC_027006	XLOC_027006	ZNF337	chr4:56191530 56215312	wt	ele	OK	0.424888	1.3757	1.69501	2.69724	0.00025	0.00183251	yes
XLOC_020409	XLOC_020409	si:ch211 59h6.1	chr22:7714161 8044288	wt	ele	OK	1.42021	4.36335	1.61933	1.90616	0.00025	0.00183251	yes
XLOC_014496	XLOC_014496	btr18 btr20	chr19:2844512 2872223	wt	ele	OK	0.548794	1.41004	1.3614	1.88551	0.00025	0.00183251	yes
XLOC_006350	XLOC_006350		chr12:43709391 43713113	wt	ele	OK	0.386214	0.983407	1.34839	2.48282	0.00025	0.00183251	yes
XLOC_001395	XLOC_001395	DCTPP1	chr1:23377311 23415647	wt	ele	OK	8.42916	18.9473	1.16853	2.58915	0.00025	0.00183251	yes
XLOC_017166	XLOC_017166	aasdh	chr20:25675065 25688979	wt	ele	OK	1.89945	4.10718	1.11257	2.12972	0.00025	0.00183251	yes
XLOC_015994	XLOC_015994	wrnip1	chr2:394829 410278	wt	ele	OK	1.14297	2.37996	1.05815	2.38878	0.00025	0.00183251	yes
XLOC_017811	XLOC_017811	si:dkey 25e12.3	chr20:26573289 26580840	wt	ele	OK	1.79328	3.65685	1.028	1.92913	0.00025	0.00183251	yes
XLOC_018190	XLOC_018190	PLCB1	chr20:55093814 55147355	wt	ele	OK	2.51182	5.00496	0.994628	2.52302	0.00025	0.00183251	yes
XLOC_034084	XLOC_034084	crb2b	chr8:2991886 3073643	wt	ele	OK	0.777691	1.46818	0.91676	2.29868	0.00025	0.00183251	yes
XLOC_013614	XLOC_013614	si:dkey 77f17.1	chr18:26623104 26659531	wt	ele	OK	2.23948	4.09849	0.871929	2.25209	0.00025	0.00183251	yes
XLOC_028354	XLOC_028354	ZNF337 si:ch211 207e19.13	chr4:57045956 57077191	wt	ele	OK	3.66367	6.60719	0.850748	2.51442	0.00025	0.00183251	yes
XLOC_000398	XLOC_000398		Zv9_NA681:79580 83776	wt	ele	OK	1.64617	2.83221	0.782811	2.2894	0.00025	0.00183251	yes
XLOC_030750	XLOC_030750		chr5:74753312 74759761	wt	ele	OK	1.26933	2.15582	0.764168	2.37172	0.00025	0.00183251	yes
XLOC_025368	XLOC_025368	si:dkeyp 69e1.8	chr3:26962518 26971140	wt	ele	OK	4.76088	7.82403	0.716683	2.0193	0.00025	0.00183251	yes
XLOC_025412	XLOC_025412	hsd17b14	chr3:30120261 30129006	wt	ele	OK	6.6619	10.4887	0.654831	2.24107	0.00025	0.00183251	yes
XLOC_004406	XLOC_004406	her15.1	chr11:43089857 43091345	wt	ele	OK	12.7771	19.9174	0.640474	2.08072	0.00025	0.00183251	yes
XLOC_029545	XLOC_029545	TRABD2A	chr5:297148 348296	wt	ele	OK	4.98416	7.76053	0.638804	2.16317	0.00025	0.00183251	yes
XLOC_018754	XLOC_018754	slc7a3a	chr21:29246062 29289182	wt	ele	OK	14.947	23.1916	0.633745	2.34921	0.00025	0.00183251	yes
XLOC_033446	XLOC_033446	PKP3	chr7:34262608 34314521	wt	ele	OK	5.78832	8.80533	0.605232	2.22124	0.00025	0.00183251	yes
XLOC_008323	XLOC_008323	irg1l	chr14:11625680 11629239	wt	ele	OK	18.5268	28.0522	0.598499	2.17484	0.00025	0.00183251	yes
XLOC_014120	XLOC_014120	ctps1a	chr19:15448071 15462787	wt	ele	OK	25.8339	38.8029	0.5869	2.36767	0.00025	0.00183251	yes
XLOC_008903	XLOC_008903	RNF169	chr15:4828001 4844139	wt	ele	OK	3.52114	5.25777	0.578408	2.2218	0.00025	0.00183251	yes
XLOC_035116	XLOC_035116	zgc:162200	chr8:38171901 38217377	wt	ele	OK	6.94158	10.2135	0.557143	2.30701	0.00025	0.00183251	yes
XLOC_013328	XLOC_013328	taldo1	chr18:49717012 49724591	wt	ele	OK	64.87	94.8481	0.548068	1.9108	0.00025	0.00183251	yes
XLOC_015441	XLOC_015441	cdc20	chr2:19217999 19234798	wt	ele	OK	37.5482	54.7324	0.54365	2.30889	0.00025	0.00183251	yes
XLOC_016413	XLOC_016413	zgc:101744	chr2:36810194 36824455	wt	ele	OK	25.9304	37.7282	0.541	2.06034	0.00025	0.00183251	yes
XLOC_009449	XLOC_009449	SLC7A1	chr15:7227884 7265416	wt	ele	OK	6.20908	8.98569	0.53325	2.02578	0.00025	0.00183251	yes
XLOC_004005	XLOC_004005	LIMA1	chr11:2307792 2356049	wt	ele	OK	9.03117	13.0296	0.528804	2.14371	0.00025	0.00183251	yes
XLOC_033676	XLOC_033676	pc	chr7:60932945 61306910	wt	ele	OK	19.4849	27.8814	0.516946	2.06598	0.00025	0.00183251	yes
XLOC_029110	XLOC_029110	lamc3	chr5:36025254 36161209	wt	ele	OK	9.01435	12.7406	0.499134	2.13286	0.00025	0.00183251	yes
XLOC_031976	XLOC_031976	mars	chr6:58823880 58877660	wt	ele	OK	14.3052	20.1589	0.494882	2.10072	0.00025	0.00183251	yes
XLOC_014174	XLOC_014174	adnp2b	chr19:21268020 21274770	wt	ele	OK	20.4252	28.145	0.462526	2.03643	0.00025	0.00183251	yes
XLOC_017820	XLOC_017820	si:dkey 85n7.7	chr20:27252455 27255485	wt	ele	OK	0.551819	6.28771	3.51027	3.03469	0.0003	0.00215436	yes
XLOC_019892	XLOC_019892		chr22:11312951 11533172	wt	ele	OK	0.315041	3.58558	3.50859	2.29162	0.0003	0.00215436	yes
XLOC_017036	XLOC_017036		chr20:12714770 12718629	wt	ele	OK	0.34135	2.9436	3.10826	4.07628	0.0003	0.00215436	yes
XLOC_017305	XLOC_017305	tdrd6	chr20:35462907 35506192	wt	ele	OK	0.270438	2.15072	2.99145	1.92124	0.0003	0.00215436	yes
XLOC_035378	XLOC_035378		chr8:516428 543753	wt	ele	OK	0.180735	1.13224	2.64723	3.13153	0.0003	0.00215436	yes
XLOC_017927	XLOC_017927	si:dkey 30j22.3	chr20:35585018 35588559	wt	ele	OK	0.376622	1.36907	1.862	2.28936	0.0003	0.00215436	yes
XLOC_027039	XLOC_027039	si:dkey 202n8.1	chr4:57967617 58011478	wt	ele	OK	0.511756	1.80068	1.81501	2.27768	0.0003	0.00215436	yes
XLOC_011522	XLOC_011522		chr16:52042389 52045192	wt	ele	OK	0.25945	0.901985	1.79765	2.70078	0.0003	0.00215436	yes
XLOC_000235	XLOC_000235		Zv9_NA437:26588 33271	wt	ele	OK	1.6377	5.47158	1.74029	3.0249	0.0003	0.00215436	yes
XLOC_018899	XLOC_018899	fgf1b	chr21:42662923 42666251	wt	ele	OK	0.681687	1.79071	1.39335	2.52808	0.0003	0.00215436	yes
XLOC_010560	XLOC_010560	si:dkey 242e21.4	chr16:43012964 43020094	wt	ele	OK	1.87758	4.67912	1.31736	1.82735	0.0003	0.00215436	yes
XLOC_019751	XLOC_019751	mibp	chr22:4759571 4850437	wt	ele	OK	7.43589	18.2159	1.29262	2.15977	0.0003	0.00215436	yes
XLOC_026450	XLOC_026450	zgc:174654	chr4:32230629 32234210	wt	ele	OK	1.48599	3.04534	1.03518	2.25364	0.0003	0.00215436	yes
XLOC_016487	XLOC_016487	gbp1	chr2:42122032 42136425	wt	ele	OK	1.53735	2.99476	0.961991	1.96058	0.0003	0.00215436	yes
XLOC_024411	XLOC_024411	CR855387.1	chr3:14781893 14792027	wt	ele	OK	2.69679	5.21124	0.950381	2.05994	0.0003	0.00215436	yes
XLOC_027303	XLOC_027303	helb	chr4:11834474 11845706	wt	ele	OK	1.56547	2.8263	0.852318	2.09884	0.0003	0.00215436	yes
XLOC_001884	XLOC_001884	CD97	chr1:59215334 59226459	wt	ele	OK	2.25606	3.91791	0.796277	2.1435	0.0003	0.00215436	yes
XLOC_035987	XLOC_035987	tmem194b	chr9:42532801 42554693	wt	ele	OK	8.92039	15.2397	0.772658	2.19352	0.0003	0.00215436	yes
XLOC_000114	XLOC_000114		Zv9_NA276:74312 76419	wt	ele	OK	3.78801	6.39704	0.755965	2.42728	0.0003	0.00215436	yes
XLOC_003574	XLOC_003574	slc43a2b	chr10:24803924 24823482	wt	ele	OK	44.6204	74.632	0.74209	2.11411	0.0003	0.00215436	yes
XLOC_015041	XLOC_015041	angpt1	chr19:48714110 48862967	wt	ele	OK	3.55628	5.83041	0.71323	2.10041	0.0003	0.00215436	yes
XLOC_005365	XLOC_005365	pms2	chr12:18671065 18687073	wt	ele	OK	2.95196	4.79861	0.700944	2.13672	0.0003	0.00215436	yes
XLOC_000252	XLOC_000252		Zv9_NA47:36917 47213	wt	ele	OK	6.40842	10.3952	0.697872	2.10276	0.0003	0.00215436	yes
XLOC_005695	XLOC_005695	dlg5b	chr12:50274725 50289840	wt	ele	OK	6.15706	9.69889	0.655578	2.36053	0.0003	0.00215436	yes
XLOC_020299	XLOC_020299	aqp12	chr22:2117481 2129581	wt	ele	OK	15.4768	23.973	0.631304	2.15525	0.0003	0.00215436	yes
XLOC_031278	XLOC_031278	ahcy	chr6:49877780 49917954	wt	ele	OK	447.3	681.669	0.60783	2.32474	0.0003	0.00215436	yes
XLOC_036509	XLOC_036509	ildr2	chr9:35245762 35272011	wt	ele	OK	8.19191	12.3427	0.591386	2.16129	0.0003	0.00215436	yes
XLOC_001112	XLOC_001112		Zv9_scaffold3561:90110 97126	wt	ele	OK	2.34894	3.53097	0.588055	2.13701	0.0003	0.00215436	yes
XLOC_031025	XLOC_031025	rhebl1	chr6:23368319 23379486	wt	ele	OK	37.8992	56.9446	0.587394	2.16203	0.0003	0.00215436	yes
XLOC_003872	XLOC_003872	h2afvb	chr10:46362730 46372778	wt	ele	OK	712.458	1027.28	0.527952	2.63606	0.0003	0.00215436	yes
XLOC_032339	XLOC_032339	fth1a	chr7:13752096 13760863	wt	ele	OK	488.806	700.905	0.519958	2.43786	0.0003	0.00215436	yes
XLOC_004508	XLOC_004508	RPL29	chr11:1361346 1365675	wt	ele	OK	1743.51	2454.66	0.493527	2.0782	0.0003	0.00215436	yes
XLOC_020640	XLOC_020640	aspm	chr22:24316700 24352431	wt	ele	OK	18.2675	25.5648	0.484875	2.10008	0.0003	0.00215436	yes
XLOC_021327	XLOC_021327	plagx	chr23:32250346 32258777	wt	ele	OK	15.5671	21.7732	0.484053	2.11544	0.0003	0.00215436	yes
XLOC_024029	XLOC_024029	CABZ01086354.1	chr25:36182654 36183146	wt	ele	OK	0.681163	106.587	7.28982	11.7817	0.00035	0.00245539	yes
XLOC_028345	XLOC_028345	si:dkey 9p20.24	chr4:56541515 56560021	wt	ele	OK	0.168541	3.57177	4.40547	2.70556	0.00035	0.00245539	yes
XLOC_009265	XLOC_009265	CU655961.3	chr15:42893838 42900410	wt	ele	OK	0.17099	2.04831	3.58245	2.76734	0.00035	0.00245539	yes
XLOC_012566	XLOC_012566	CU695222.1	chr17:45321653 45331141	wt	ele	OK	0.193164	1.7291	3.16212	1.81811	0.00035	0.00245539	yes
XLOC_018463	XLOC_018463	si:dkey 93m18.3	chr21:6117510 6120175	wt	ele	OK	0.5394	4.60415	3.09351	4.30918	0.00035	0.00245539	yes
XLOC_029693	XLOC_029693	si:dkey 258p11.1	chr5:11396268 11408016	wt	ele	OK	0.256766	2.04443	2.99317	2.09303	0.00035	0.00245539	yes
XLOC_034695	XLOC_034695	CABZ01076121.1	chr8:516428 543753	wt	ele	OK	0.704637	3.66878	2.38035	2.11143	0.00035	0.00245539	yes
XLOC_033791	XLOC_033791		chr7:76478022 76487314	wt	ele	OK	0.412182	1.90265	2.20666	2.79065	0.00035	0.00245539	yes
XLOC_008560	XLOC_008560	srpx2	chr14:36661905 36682461	wt	ele	OK	0.46972	1.25905	1.42247	2.27335	0.00035	0.00245539	yes
XLOC_034527	XLOC_034527	si:ch211 170d8.2	chr8:41748563 41750788	wt	ele	OK	1.15936	2.90803	1.32671	2.6876	0.00035	0.00245539	yes
XLOC_027717	XLOC_027717	si:dkey 207m2.4	chr4:34217540 34252303	wt	ele	OK	0.528968	1.17224	1.14802	2.14778	0.00035	0.00245539	yes
XLOC_022280	XLOC_022280		chr24:10198586 10207456	wt	ele	OK	1.54644	3.28123	1.08529	2.24069	0.00035	0.00245539	yes
XLOC_033778	XLOC_033778	METTL4	chr7:75264027 75272814	wt	ele	OK	1.18736	2.32191	0.967559	2.2729	0.00035	0.00245539	yes
XLOC_009870	XLOC_009870	chd	chr15:46135866 46173284	wt	ele	OK	1.2046	2.34253	0.959515	2.27758	0.00035	0.00245539	yes
XLOC_026465	XLOC_026465	CR407594.2	chr4:33168205 33177519	wt	ele	OK	2.96758	5.74553	0.953151	2.12031	0.00035	0.00245539	yes
XLOC_000372	XLOC_000372		Zv9_NA662:46 3333	wt	ele	OK	6.29065	12.1331	0.94767	2.20616	0.00035	0.00245539	yes
XLOC_008256	XLOC_008256	CU638740.3	chr14:4342244 4355012	wt	ele	OK	2.96071	5.69505	0.943765	2.20557	0.00035	0.00245539	yes
XLOC_029517	XLOC_029517	ugt2a5	chr5:72898762 72906166	wt	ele	OK	1.70061	3.20859	0.915883	1.96784	0.00035	0.00245539	yes
XLOC_015247	XLOC_015247	FP236168.1	chr2:2392164 2425599	wt	ele	OK	1.85447	3.22933	0.800225	2.20978	0.00035	0.00245539	yes
XLOC_031236	XLOC_031236	h6pd	chr6:45856164 45866649	wt	ele	OK	4.36486	7.55956	0.792369	1.97815	0.00035	0.00245539	yes
XLOC_018128	XLOC_018128	nfkbie	chr20:51608937 51644431	wt	ele	OK	4.38103	7.48472	0.772677	2.48268	0.00035	0.00245539	yes
XLOC_004460	XLOC_004460		chr11:46298879 46301497	wt	ele	OK	10.8811	18.5157	0.766921	2.78388	0.00035	0.00245539	yes
XLOC_035660	XLOC_035660	FAM117B	chr9:13396477 13494362	wt	ele	OK	4.19106	6.98731	0.737422	1.96348	0.00035	0.00245539	yes
XLOC_012526	XLOC_012526	BX548170.1	chr17:40274683 40276393	wt	ele	OK	5.47457	8.97035	0.71242	2.43369	0.00035	0.00245539	yes
XLOC_029593	XLOC_029593		chr5:2260047 2262699	wt	ele	OK	3.66348	5.99757	0.711165	2.2927	0.00035	0.00245539	yes
XLOC_011605	XLOC_011605	si:zfos 364h11.1	chr17:4153706 4182450	wt	ele	OK	1.03814	1.69772	0.709597	2.06064	0.00035	0.00245539	yes
XLOC_006179	XLOC_006179		chr12:44311270 44318811	wt	ele	OK	4.34495	6.59509	0.602052	2.12702	0.00035	0.00245539	yes
XLOC_013204	XLOC_013204	qpctla	chr18:35558975 35574532	wt	ele	OK	7.41879	11.2257	0.597545	2.34678	0.00035	0.00245539	yes
XLOC_011930	XLOC_011930	mpp5a	chr17:34353758 34409463	wt	ele	OK	6.83209	10.085	0.56181	2.06642	0.00035	0.00245539	yes
XLOC_034876	XLOC_034876	SNORD47 SNORD75 SNORD77 SNORD79 gas5 snosnR60_Z15	chr8:17129285 17132858	wt	ele	OK	54.5651	80.3648	0.558586	2.06475	0.00035	0.00245539	yes
XLOC_015214	XLOC_015214	CPN2	chr2:93281 97276	wt	ele	OK	7.85243	11.5107	0.551758	2.00245	0.00035	0.00245539	yes
XLOC_009119	XLOC_009119	pitpnaa	chr15:27759547 27773895	wt	ele	OK	21.9326	31.0372	0.500922	2.06264	0.00035	0.00245539	yes
XLOC_033545	XLOC_033545	ZPLXDC2	chr7:44246802 44357323	wt	ele	OK	8.04828	11.3785	0.499556	2.04567	0.00035	0.00245539	yes
XLOC_014897	XLOC_014897	fuca1	chr19:33870882 33875837	wt	ele	OK	41.8918	58.7043	0.486798	2.34197	0.00035	0.00245539	yes
XLOC_022864	XLOC_022864	rpl22l1	chr24:27271783 27276547	wt	ele	OK	305.566	426.959	0.482616	2.12668	0.00035	0.00245539	yes
XLOC_034673	XLOC_034673	CHDH	chr8:55542674 55559479	wt	ele	OK	5.5316	7.72532	0.481898	1.95365	0.00035	0.00245539	yes
XLOC_018958	XLOC_018958	nars	chr21:1071551 1092450	wt	ele	OK	70.8674	98.2998	0.472068	2.05478	0.00035	0.00245539	yes
XLOC_024592	XLOC_024592	emp2	chr3:27178899 27207291	wt	ele	OK	38.8847	53.6413	0.464141	2.17838	0.00035	0.00245539	yes
XLOC_025745	XLOC_025745	hbae1	chr3:55972045 55972738	wt	ele	OK	330.446	455.448	0.462873	2.95745	0.00035	0.00245539	yes
XLOC_023619	XLOC_023619	si:ch211 113a14.23 si:ch211 113a14.29	chr25:37321227 37406941	wt	ele	OK	2.54797	168.492	6.04719	2.74548	0.0004	0.00274441	yes
XLOC_034441	XLOC_034441		chr8:32850487 32854700	wt	ele	OK	0.124217	1.07199	3.10936	3.42558	0.0004	0.00274441	yes
XLOC_020988	XLOC_020988	top1	chr23:2764488 2792128	wt	ele	OK	1.17218	5.89893	2.33126	1.66747	0.0004	0.00274441	yes
XLOC_025635	XLOC_025635	cyp3c1l2	chr3:40942742 40950564	wt	ele	OK	0.201929	0.964767	2.25634	2.77605	0.0004	0.00274441	yes
XLOC_016345	XLOC_016345	si:ch211 106h4.5	chr2:31326755 31330113	wt	ele	OK	0.682078	2.78559	2.02998	1.49956	0.0004	0.00274441	yes
XLOC_020418	XLOC_020418		chr22:8111050 8287661	wt	ele	OK	4.21942	11.8451	1.48917	2.93915	0.0004	0.00274441	yes
XLOC_026667	XLOC_026667	si:dkey 270b7.5	chr4:44994188 45003798	wt	ele	OK	1.63496	4.46574	1.44965	2.92965	0.0004	0.00274441	yes
XLOC_023081	XLOC_023081		chr24:9071957 9075435	wt	ele	OK	0.689386	1.47644	1.09874	2.37456	0.0004	0.00274441	yes
XLOC_021121	XLOC_021121		chr23:17583255 17591924	wt	ele	OK	1.31758	2.7999	1.08748	2.46506	0.0004	0.00274441	yes
XLOC_020649	XLOC_020649	si:rp71 23d18.2 vtg1 vtg4 vtg5 vtg7	chr22:25203434 25330520	wt	ele	OK	1.00444	2.12033	1.0779	1.28716	0.0004	0.00274441	yes
XLOC_009392	XLOC_009392	slc25a15a	chr15:3364312 3391454	wt	ele	OK	1.85082	3.80571	1.04	2.50271	0.0004	0.00274441	yes
XLOC_023277	XLOC_023277		chr25:7339230 7347102	wt	ele	OK	4.05562	8.33404	1.03909	2.10005	0.0004	0.00274441	yes
XLOC_020068	XLOC_020068	cfhl5	chr22:24286453 24301215	wt	ele	OK	2.85146	5.85183	1.03719	2.65362	0.0004	0.00274441	yes
XLOC_023324	XLOC_023324	CR384059.2	chr25:12762186 12767427	wt	ele	OK	2.14005	4.31217	1.01077	2.5187	0.0004	0.00274441	yes
XLOC_015771	XLOC_015771	zgc:152670	chr2:44409990 44424444	wt	ele	OK	1.40306	2.78538	0.989303	2.15857	0.0004	0.00274441	yes
XLOC_013096	XLOC_013096	si:ch211 39k3.2	chr18:25536286 25555248	wt	ele	OK	7.26844	14.4002	0.98637	2.88808	0.0004	0.00274441	yes
XLOC_006464	XLOC_006464		chr13:5129397 5165944	wt	ele	OK	1.50623	2.94166	0.965684	2.07115	0.0004	0.00274441	yes
XLOC_013291	XLOC_013291	daw1	chr18:44790936 44802533	wt	ele	OK	2.92167	5.48579	0.908907	2.26761	0.0004	0.00274441	yes
XLOC_000373	XLOC_000373		Zv9_NA662:3897 4957	wt	ele	OK	4.26404	7.73761	0.859669	2.46371	0.0004	0.00274441	yes
XLOC_006005	XLOC_006005	eme1	chr12:23027492 23043505	wt	ele	OK	7.3506	13.0198	0.82477	2.28958	0.0004	0.00274441	yes
XLOC_010392	XLOC_010392	NSMCE2	chr16:27903361 27912154	wt	ele	OK	7.39834	13.0627	0.820178	2.08442	0.0004	0.00274441	yes
XLOC_034789	XLOC_034789	tsr2	chr8:8836309 8894486	wt	ele	OK	16.3877	28.2721	0.786769	2.21031	0.0004	0.00274441	yes
XLOC_029439	XLOC_029439	TTF1	chr5:66559467 66573658	wt	ele	OK	3.32187	5.71591	0.78299	2.37797	0.0004	0.00274441	yes
XLOC_009264	XLOC_009264	NAALAD2	chr15:42703277 42740355	wt	ele	OK	6.11155	9.27888	0.602412	2.03733	0.0004	0.00274441	yes
XLOC_024440	XLOC_024440	stat3	chr3:16650645 16730037	wt	ele	OK	9.01233	13.5615	0.589548	2.0406	0.0004	0.00274441	yes
XLOC_005845	XLOC_005845	ace	chr12:6204221 6256035	wt	ele	OK	3.16384	4.7043	0.572306	2.03373	0.0004	0.00274441	yes
XLOC_013264	XLOC_013264	ehd2	chr18:43066458 43079899	wt	ele	OK	10.6523	15.2716	0.519687	2.21633	0.0004	0.00274441	yes
XLOC_013137	XLOC_013137	cd151l	chr18:30942825 30955459	wt	ele	OK	40.4756	57.2382	0.499926	2.02091	0.0004	0.00274441	yes
XLOC_009366	XLOC_009366	POR	chr15:1836440 1874553	wt	ele	OK	8.54563	11.9885	0.488396	1.94351	0.0004	0.00274441	yes
XLOC_011012	XLOC_011012		chr16:26840472 26852249	wt	ele	OK	95.2188	132.632	0.478108	2.07891	0.0004	0.00274441	yes
XLOC_036401	XLOC_036401	RBBP6	chr9:28784086 28823963	wt	ele	OK	0.117418	2.48007	4.40065	1.02128	0.00045	0.00304428	yes
XLOC_028902	XLOC_028902	isg15	chr5:21895402 21896541	wt	ele	OK	0.375027	5.57812	3.89471	3.80488	0.00045	0.00304428	yes
XLOC_028273	XLOC_028273	si:ch211 152l15.4	chr4:53456593 53464880	wt	ele	OK	0.181018	0.881869	2.28443	2.26341	0.00045	0.00304428	yes
XLOC_025401	XLOC_025401	si:dkey 165i8.5	chr3:29774235 29777054	wt	ele	OK	0.854183	3.14284	1.87945	2.64016	0.00045	0.00304428	yes
XLOC_033386	XLOC_033386	stk33	chr7:29711230 29740214	wt	ele	OK	0.336874	1.21472	1.85034	1.60456	0.00045	0.00304428	yes
XLOC_023656	XLOC_023656	CU183952.1	chr25:1406534 1408840	wt	ele	OK	0.369501	1.18827	1.68521	2.12048	0.00045	0.00304428	yes
XLOC_010294	XLOC_010294	si:ch211 254p10.2	chr16:20964219 20978845	wt	ele	OK	0.311923	0.958601	1.61974	1.95492	0.00045	0.00304428	yes
XLOC_019835	XLOC_019835	rnh1	chr22:8942784 8946531	wt	ele	OK	0.671515	1.99368	1.56994	2.7687	0.00045	0.00304428	yes
XLOC_034215	XLOC_034215	cenph	chr8:17687275 17703899	wt	ele	OK	6.27714	15.1987	1.27577	2.49768	0.00045	0.00304428	yes
XLOC_028921	XLOC_028921	si:dkey 13n15.11	chr5:23007695 23038588	wt	ele	OK	0.465095	1.10088	1.24306	2.23782	0.00045	0.00304428	yes
XLOC_026659	XLOC_026659	si:ch211 59m15.1	chr4:44577930 44579316	wt	ele	OK	3.19012	6.9516	1.12374	2.19729	0.00045	0.00304428	yes
XLOC_024555	XLOC_024555	zgc:113411	chr3:24919850 24941593	wt	ele	OK	2.50235	4.68178	0.903774	1.8974	0.00045	0.00304428	yes
XLOC_015069	XLOC_015069		chr19:50172852 50177244	wt	ele	OK	27.754	48.0718	0.792493	3.92525	0.00045	0.00304428	yes
XLOC_003165	XLOC_003165	mis18a	chr10:34616996 34622392	wt	ele	OK	5.69145	9.43805	0.729693	2.36876	0.00045	0.00304428	yes
XLOC_010870	XLOC_010870	isoc2	chr16:14545331 14561307	wt	ele	OK	10.5238	17.3739	0.723272	2.15582	0.00045	0.00304428	yes
XLOC_003386	XLOC_003386	mat2al	chr10:4973035 4999450	wt	ele	OK	7.69646	12.6297	0.714552	2.37153	0.00045	0.00304428	yes
XLOC_032316	XLOC_032316	PCSK6	chr7:9886769 10057833	wt	ele	OK	1.79351	2.88837	0.687474	2.02153	0.00045	0.00304428	yes
XLOC_031829	XLOC_031829	slc6a13	chr6:41049740 41069791	wt	ele	OK	4.5691	7.3494	0.685716	2.02998	0.00045	0.00304428	yes
XLOC_003311	XLOC_003311	xrcc4	chr10:44597965 44662736	wt	ele	OK	6.18508	9.90372	0.67918	2.00493	0.00045	0.00304428	yes
XLOC_033316	XLOC_033316	TIFA	chr7:23955820 23957526	wt	ele	OK	24.2295	38.7196	0.676298	2.03254	0.00045	0.00304428	yes
XLOC_004483	XLOC_004483	cdk4	chr11:183567 188495	wt	ele	OK	16.3754	24.8204	0.6	1.99959	0.00045	0.00304428	yes
XLOC_016042	XLOC_016042	tfr1a	chr2:4732831 4763716	wt	ele	OK	12.7293	19.2806	0.599002	2.02158	0.00045	0.00304428	yes
XLOC_027124	XLOC_027124	aim1b	chr4:630079 667391	wt	ele	OK	3.36879	4.9572	0.557294	2.06217	0.00045	0.00304428	yes
XLOC_014796	XLOC_014796	thbs3b	chr19:24901839 24929418	wt	ele	OK	9.4218	13.827	0.553413	2.01685	0.00045	0.00304428	yes
XLOC_019626	XLOC_019626	ftsj	chr22:1252694 1280124	wt	ele	OK	14.5374	20.6641	0.507361	2.23406	0.00045	0.00304428	yes
XLOC_002872	XLOC_002872	tpm2	chr10:8303855 8360758	wt	ele	OK	138.555	195.788	0.498827	2.09044	0.00045	0.00304428	yes
XLOC_024726	XLOC_024726	zgc:86896	chr3:36274809 36283400	wt	ele	OK	133.789	184.392	0.462816	1.94739	0.00045	0.00304428	yes
XLOC_032269	XLOC_032269	zgc:195633	chr7:6747892 6750195	wt	ele	OK	0.415178	8.68509	4.38674	2.61329	0.0005	0.0033237	yes
XLOC_000107	XLOC_000107		Zv9_NA27:12969 42527	wt	ele	OK	0.452818	1.40825	1.6369	2.70105	0.0005	0.0033237	yes
XLOC_002665	XLOC_002665		chr1:12481905 12483807	wt	ele	OK	0.546914	1.56206	1.51406	2.6056	0.0005	0.0033237	yes
XLOC_035817	XLOC_035817	si:rp71 84d19.2	chr9:28334221 28335123	wt	ele	OK	1.89847	4.85976	1.35605	2.85972	0.0005	0.0033237	yes
XLOC_018780	XLOC_018780	C21HXorf40A	chr21:33044886 33049876	wt	ele	OK	2.07073	4.05385	0.969153	2.40574	0.0005	0.0033237	yes
XLOC_010616	XLOC_010616	dnase2	chr16:48401685 48421041	wt	ele	OK	2.30321	4.39242	0.931373	2.16764	0.0005	0.0033237	yes
XLOC_020515	XLOC_020515	s100b	chr22:13991170 14001512	wt	ele	OK	3.76058	6.96793	0.889775	2.16999	0.0005	0.0033237	yes
XLOC_011286	XLOC_011286	AL844567.1	chr16:47741411 47780476	wt	ele	OK	1.30127	2.29011	0.815502	2.02665	0.0005	0.0033237	yes
XLOC_020615	XLOC_020615	cks2	chr22:21635105 21636634	wt	ele	OK	9.30338	16.244	0.804077	2.15448	0.0005	0.0033237	yes
XLOC_016265	XLOC_016265	csrnp1a	chr2:24059005 24073303	wt	ele	OK	3.14798	5.44946	0.791685	2.02171	0.0005	0.0033237	yes
XLOC_009592	XLOC_009592	zgc:154093	chr15:23047061 23053285	wt	ele	OK	2.29637	3.89412	0.761941	2.24075	0.0005	0.0033237	yes
XLOC_007209	XLOC_007209	rel	chr13:26019400 26043715	wt	ele	OK	3.70342	6.21661	0.747271	2.38582	0.0005	0.0033237	yes
XLOC_035730	XLOC_035730	trim45	chr9:21559666 21572211	wt	ele	OK	3.8149	6.3048	0.724806	2.11205	0.0005	0.0033237	yes
XLOC_029577	XLOC_029577	SURF2	chr5:1529004 1540198	wt	ele	OK	12.5144	20.2211	0.692269	2.12502	0.0005	0.0033237	yes
XLOC_020570	XLOC_020570	SBNO2 SBNO2	chr22:17916316 18043644	wt	ele	OK	2.8878	4.55458	0.657349	2.00785	0.0005	0.0033237	yes
XLOC_022856	XLOC_022856	KLHL24	chr24:26558050 26585445	wt	ele	OK	5.55286	8.75714	0.657229	1.98989	0.0005	0.0033237	yes
XLOC_019013	XLOC_019013	prodha	chr21:5708241 5729989	wt	ele	OK	8.8844	13.8353	0.63901	1.99074	0.0005	0.0033237	yes
XLOC_010895	XLOC_010895	crabp2a	chr16:16149304 16161711	wt	ele	OK	9.32039	14.3685	0.624445	2.23071	0.0005	0.0033237	yes
XLOC_006964	XLOC_006964		chr13:737451 745859	wt	ele	OK	12.8244	19.5646	0.609352	2.41793	0.0005	0.0033237	yes
XLOC_008595	XLOC_008595	cenpi	chr14:42719451 42747792	wt	ele	OK	9.74456	14.3995	0.563346	2.1734	0.0005	0.0033237	yes
XLOC_009862	XLOC_009862		chr15:45650612 45673143	wt	ele	OK	238.013	350.854	0.559829	2.59979	0.0005	0.0033237	yes
XLOC_031273	XLOC_031273	ctsz	chr6:49723037 49733028	wt	ele	OK	15.6492	22.7124	0.537389	2.04828	0.0005	0.0033237	yes
XLOC_009441	XLOC_009441	atm	chr15:6399737 6503351	wt	ele	OK	2.44182	3.53373	0.53323	1.96326	0.0005	0.0033237	yes
XLOC_010517	XLOC_010517	decr1	chr16:38154170 38165789	wt	ele	OK	15.3037	22.0953	0.529859	1.991	0.0005	0.0033237	yes
XLOC_029977	XLOC_029977	pole3	chr5:34506016 34520050	wt	ele	OK	31.2971	44.7189	0.514854	2.01299	0.0005	0.0033237	yes
XLOC_032848	XLOC_032848	rpl34	chr7:60125196 60140343	wt	ele	OK	1862.11	2648.25	0.5081	1.98244	0.0005	0.0033237	yes
XLOC_018807	XLOC_018807	pgrmc1	chr21:36762306 36766175	wt	ele	OK	38.739	54.5535	0.493883	2.41475	0.0005	0.0033237	yes
XLOC_018549	XLOC_018549	ddt	chr21:13912128 13914833	wt	ele	OK	39.1794	54.7419	0.482549	1.97017	0.0005	0.0033237	yes
XLOC_008483	XLOC_008483	efemp2a	chr14:31539290 31573704	wt	ele	OK	7.86922	10.9603	0.477991	2.05622	0.0005	0.0033237	yes
XLOC_024614	XLOC_024614	rac2	chr3:29661961 29694388	wt	ele	OK	36.1558	50.1376	0.471665	1.95764	0.0005	0.0033237	yes
XLOC_036468	XLOC_036468	hspd1	chr9:33319912 33334091	wt	ele	OK	97.1749	133.505	0.458238	1.94955	0.0005	0.0033237	yes
XLOC_033840	XLOC_033840		chr7:6872338 6875261	wt	ele	OK	0.0721357	4.75019	6.04113	6.10735	0.00055	0.00359953	yes
XLOC_032279	XLOC_032279	zgc:195633	chr7:6819341 6819725	wt	ele	OK	1.06724	28.104	4.71881	8.19946	0.00055	0.00359953	yes
XLOC_004836	XLOC_004836		chr11:30611474 30613912	wt	ele	OK	0.449203	1.68383	1.90631	2.85074	0.00055	0.00359953	yes
XLOC_035468	XLOC_035468		chr8:41464651 41528361	wt	ele	OK	0.296636	1.10898	1.90247	2.49132	0.00055	0.00359953	yes
XLOC_024222	XLOC_024222	zgc:172051	chr3:1777474 1800208	wt	ele	OK	0.934853	3.18785	1.76977	2.44853	0.00055	0.00359953	yes
XLOC_026563	XLOC_026563	si:dkeyp 35e5.9	chr4:38880239 38887226	wt	ele	OK	0.56254	1.63203	1.53664	2.68465	0.00055	0.00359953	yes
XLOC_013699	XLOC_013699	zbtb38	chr18:39538396 39552291	wt	ele	OK	0.290162	0.817402	1.49419	2.28237	0.00055	0.00359953	yes
XLOC_036675	XLOC_036675	fancb	chr9:56962644 56990531	wt	ele	OK	1.15667	2.81597	1.28366	2.15507	0.00055	0.00359953	yes
XLOC_000681	XLOC_000681		Zv9_NA95:35446 41137	wt	ele	OK	2.05885	4.81722	1.22636	2.41423	0.00055	0.00359953	yes
XLOC_036115	XLOC_036115	marco	chr9:781712 799576	wt	ele	OK	0.901722	1.99741	1.14738	2.00828	0.00055	0.00359953	yes
XLOC_019258	XLOC_019258	zgc:110782	chr21:26587156 26589717	wt	ele	OK	1.65695	3.63822	1.1347	2.07132	0.00055	0.00359953	yes
XLOC_011741	XLOC_011741	neurlb	chr17:20330438 20348778	wt	ele	OK	0.968063	1.97472	1.02847	2.25151	0.00055	0.00359953	yes
XLOC_017293	XLOC_017293	mcm3	chr20:34794804 34893422	wt	ele	OK	6.4416	13.118	1.02606	2.31047	0.00055	0.00359953	yes
XLOC_019034	XLOC_019034	si:dkey 163m14.2	chr21:7347432 7359201	wt	ele	OK	1.31881	2.56974	0.962382	2.07842	0.00055	0.00359953	yes
XLOC_034326	XLOC_034326	fance	chr8:24584425 24590313	wt	ele	OK	3.02152	5.25978	0.799724	2.31115	0.00055	0.00359953	yes
XLOC_033614	XLOC_033614		chr7:53207577 53212398	wt	ele	OK	2.06041	3.57533	0.795144	2.33015	0.00055	0.00359953	yes
XLOC_023668	XLOC_023668		chr25:2485421 2487302	wt	ele	OK	6.0925	10.1218	0.732353	2.36311	0.00055	0.00359953	yes
XLOC_023248	XLOC_023248	athl1	chr25:5202436 5227423	wt	ele	OK	3.77725	6.08386	0.687652	2.11265	0.00055	0.00359953	yes
XLOC_025382	XLOC_025382	si:ch211 157c3.4	chr3:27793196 27814566	wt	ele	OK	21.3917	33.6522	0.653646	2.08546	0.00055	0.00359953	yes
XLOC_018790	XLOC_018790	kdelc2	chr21:34007229 34021094	wt	ele	OK	5.28628	7.93211	0.585453	2.13513	0.00055	0.00359953	yes
XLOC_007189	XLOC_007189	slc1a4	chr13:24655103 24671375	wt	ele	OK	38.0539	57.019	0.583398	2.00004	0.00055	0.00359953	yes
XLOC_027301	XLOC_027301	MGST1	chr4:11783488 11812712	wt	ele	OK	10.0969	14.6314	0.535161	2.01572	0.00055	0.00359953	yes
XLOC_022369	XLOC_022369	si:ch211 161h7.6 zgc:56530	chr24:21525202 21530166	wt	ele	OK	40.8625	59.02	0.530427	2.05331	0.00055	0.00359953	yes
XLOC_034390	XLOC_034390	rhoad	chr8:28408256 28477272	wt	ele	OK	56.2202	80.1896	0.512327	2.57958	0.00055	0.00359953	yes
XLOC_032421	XLOC_032421	CD68	chr7:20639679 20649221	wt	ele	OK	34.5604	47.6547	0.463499	2.20312	0.00055	0.00359953	yes
XLOC_012232	XLOC_012232	lgals3l	chr17:10685536 10699306	wt	ele	OK	54.2869	74.6052	0.458671	2.01815	0.00055	0.00359953	yes
XLOC_002854	XLOC_002854	sub1a	chr10:7119643 7126599	wt	ele	OK	172.498	232.357	0.429764	1.88878	0.00055	0.00359953	yes
XLOC_033799	XLOC_033799	si:ch211 113a14.14	chr7:76846356 76846767	wt	ele	OK	0.715629	29.2741	5.35427	8.66614	0.0006	0.0038638	yes
XLOC_008129	XLOC_008129	adra1bb	chr14:45797804 45816079	wt	ele	OK	0.219039	1.1752	2.42365	3.15804	0.0006	0.0038638	yes
XLOC_013790	XLOC_013790		chr18:258695 259474	wt	ele	OK	1.02016	3.59891	1.81876	3.16654	0.0006	0.0038638	yes
XLOC_016633	XLOC_016633	HSD11B1L	chr2:54045003 54068848	wt	ele	OK	0.570363	1.91575	1.74796	2.33956	0.0006	0.0038638	yes
XLOC_013182	XLOC_013182	CR626874.1	chr18:33103155 33279096	wt	ele	OK	0.439025	1.4708	1.74422	2.38503	0.0006	0.0038638	yes
XLOC_025215	XLOC_025215	swsap1	chr3:14170453 14176207	wt	ele	OK	0.731688	2.16823	1.56721	2.63906	0.0006	0.0038638	yes
XLOC_034745	XLOC_034745	cdc45	chr8:4717093 4969264	wt	ele	OK	7.87967	22.06	1.48523	2.19104	0.0006	0.0038638	yes
XLOC_012904	XLOC_012904	si:dkeyp 1h4.9	chr18:7032703 7035514	wt	ele	OK	0.765893	2.06433	1.43046	2.14954	0.0006	0.0038638	yes
XLOC_034685	XLOC_034685	TMCC1	chr8:56132523 56150862	wt	ele	OK	0.539656	1.34754	1.32022	2.00549	0.0006	0.0038638	yes
XLOC_016762	XLOC_016762		chr2:18567513 18570445	wt	ele	OK	0.624143	1.38772	1.15277	2.28552	0.0006	0.0038638	yes
XLOC_034661	XLOC_034661	nr6a1a	chr8:54781718 54804470	wt	ele	OK	1.56794	3.08249	0.975228	1.99368	0.0006	0.0038638	yes
XLOC_025084	XLOC_025084	ZC3H7B ZC3H7B	chr3:4626878 5067806	wt	ele	OK	3.26697	6.19679	0.923568	1.99711	0.0006	0.0038638	yes
XLOC_024690	XLOC_024690	hspb9	chr3:33437531 33438196	wt	ele	OK	7.77832	14.2808	0.876543	2.75756	0.0006	0.0038638	yes
XLOC_015068	XLOC_015068		chr19:50167812 50170349	wt	ele	OK	12.8871	23.4725	0.865039	3.2884	0.0006	0.0038638	yes
XLOC_028834	XLOC_028834	tesca	chr5:12929284 12952804	wt	ele	OK	2.29592	3.9758	0.79217	2.22116	0.0006	0.0038638	yes
XLOC_008035	XLOC_008035	inppl1b	chr14:33618221 33651058	wt	ele	OK	1.17887	2.03222	0.785652	1.98233	0.0006	0.0038638	yes
XLOC_017615	XLOC_017615	CYP46A1 cyp46a2 cyp46a4	chr20:5277149 5331032	wt	ele	OK	2.92551	4.97933	0.76726	2.09711	0.0006	0.0038638	yes
XLOC_034526	XLOC_034526	hps4	chr8:41720551 41745001	wt	ele	OK	2.4047	4.03561	0.746934	1.97352	0.0006	0.0038638	yes
XLOC_018833	XLOC_018833	slc47a1	chr21:38777565 38810294	wt	ele	OK	4.54938	7.51697	0.72448	2.02725	0.0006	0.0038638	yes
XLOC_035530	XLOC_035530	ENSDARG00000093125	chr9:398947 423700	wt	ele	OK	16.0892	25.1581	0.644933	1.99351	0.0006	0.0038638	yes
XLOC_019347	XLOC_019347	UIMC1	chr21:36373151 36415511	wt	ele	OK	3.69282	5.77133	0.644182	2.05332	0.0006	0.0038638	yes
XLOC_008148	XLOC_008148	RAB11FIP5	chr14:48198101 48238780	wt	ele	OK	1.03332	1.59312	0.624571	1.93146	0.0006	0.0038638	yes
XLOC_012184	XLOC_012184	dnajc5gb	chr17:6253922 6272278	wt	ele	OK	4.97681	7.52188	0.595871	2.03364	0.0006	0.0038638	yes
XLOC_032578	XLOC_032578	vrk3	chr7:30402422 30417063	wt	ele	OK	6.27959	9.32039	0.569719	1.93307	0.0006	0.0038638	yes
XLOC_002058	XLOC_002058	PGBD4	chr1:13384193 13422982	wt	ele	OK	10.4424	15.4934	0.5692	1.98152	0.0006	0.0038638	yes
XLOC_018863	XLOC_018863	msxd	chr21:40051374 40054549	wt	ele	OK	11.7018	17.2038	0.555996	1.96296	0.0006	0.0038638	yes
XLOC_005187	XLOC_005187	rasd1	chr12:1576091 1577697	wt	ele	OK	14.237	20.8965	0.553613	2.29466	0.0006	0.0038638	yes
XLOC_008377	XLOC_008377	MXRA5	chr14:15433868 15491413	wt	ele	OK	3.47306	5.00024	0.525792	2.03837	0.0006	0.0038638	yes
XLOC_023531	XLOC_023531	hsd17b12a	chr25:31185670 31220191	wt	ele	OK	13.7809	19.7694	0.520603	1.99486	0.0006	0.0038638	yes
XLOC_031373	XLOC_031373	shmt2	chr6:59094170 59150417	wt	ele	OK	31.8671	45.5973	0.516878	1.98649	0.0006	0.0038638	yes
XLOC_026942	XLOC_026942	si:dkey 256i11.1	chr4:51346956 51368205	wt	ele	OK	4.31844	6.1576	0.511857	1.99042	0.0006	0.0038638	yes
XLOC_035637	XLOC_035637	TTF2	chr9:10152075 10174881	wt	ele	OK	6.45343	9.19828	0.511298	1.93368	0.0006	0.0038638	yes
XLOC_008533	XLOC_008533	SNORA69 rpl39	chr14:34306763 34309051	wt	ele	OK	1881.19	2662.03	0.500879	1.98759	0.0006	0.0038638	yes
XLOC_010488	XLOC_010488	rragca	chr16:35477518 35492780	wt	ele	OK	13.0703	18.407	0.493962	2.13042	0.0006	0.0038638	yes
XLOC_019208	XLOC_019208	rb1	chr21:22075716 22132576	wt	ele	OK	12.1828	17.1085	0.489874	2.02847	0.0006	0.0038638	yes
XLOC_023490	XLOC_023490		chr25:27198296 27199277	wt	ele	OK	0.718726	4.32919	2.59058	4.04636	0.00065	0.00413522	yes
XLOC_020964	XLOC_020964	irf10	chr23:658180 669549	wt	ele	OK	0.319599	1.37985	2.11017	2.19667	0.00065	0.00413522	yes
XLOC_023006	XLOC_023006	CU929175.1	chr24:40162333 40166008	wt	ele	OK	0.920593	3.50568	1.92906	3.27048	0.00065	0.00413522	yes
XLOC_015448	XLOC_015448	olfml2bb	chr2:20374318 20384987	wt	ele	OK	1.83233	4.22909	1.20667	2.08206	0.00065	0.00413522	yes
XLOC_028797	XLOC_028797	C5H5orf34	chr5:9040289 9062012	wt	ele	OK	1.92687	4.21599	1.12961	1.98956	0.00065	0.00413522	yes
XLOC_008017	XLOC_008017	BX511227.1	chr14:32343766 32345652	wt	ele	OK	2.46992	5.23442	1.08357	2.04765	0.00065	0.00413522	yes
XLOC_011369	XLOC_011369	NOD1	chr16:57287827 57304363	wt	ele	OK	0.589217	1.23202	1.06415	1.91887	0.00065	0.00413522	yes
XLOC_034205	XLOC_034205	cdkn2c	chr8:16927283 16931529	wt	ele	OK	2.02289	4.06331	1.00624	2.19831	0.00065	0.00413522	yes
XLOC_016966	XLOC_016966	TRAF3IP2	chr20:3442984 3455196	wt	ele	OK	2.91061	5.80901	0.996971	2.16913	0.00065	0.00413522	yes
XLOC_018104	XLOC_018104	nkx2.2b	chr20:49095817 49145612	wt	ele	OK	1.90879	3.80144	0.993888	2.23118	0.00065	0.00413522	yes
XLOC_036453	XLOC_036453	zic5	chr9:32307415 32347632	wt	ele	OK	8.30021	15.1902	0.871924	2.27156	0.00065	0.00413522	yes
XLOC_013484	XLOC_013484	si:dkey 103i16.2	chr18:15045356 15053405	wt	ele	OK	2.99857	5.4527	0.862696	2.35739	0.00065	0.00413522	yes
XLOC_029377	XLOC_029377		chr5:62750290 62762191	wt	ele	OK	13.8571	25.1481	0.859824	2.03382	0.00065	0.00413522	yes
XLOC_033363	XLOC_033363	serpine1	chr7:27391451 27395882	wt	ele	OK	3.17444	5.42526	0.773188	2.24696	0.00065	0.00413522	yes
XLOC_006578	XLOC_006578	fignl1	chr13:15887130 15897901	wt	ele	OK	3.45641	5.7323	0.72984	2.08967	0.00065	0.00413522	yes
XLOC_006665	XLOC_006665	SPEF1 adam8a	chr13:24895354 24912012	wt	ele	OK	3.02746	4.90516	0.696193	2.05013	0.00065	0.00413522	yes
XLOC_029474	XLOC_029474	malt1b	chr5:69300318 69330394	wt	ele	OK	1.9201	3.05533	0.67015	1.8988	0.00065	0.00413522	yes
XLOC_025623	XLOC_025623	top3a	chr3:40230080 40249691	wt	ele	OK	3.55821	5.35189	0.588896	1.99405	0.00065	0.00413522	yes
XLOC_032775	XLOC_032775	apip	chr7:51358470 51365506	wt	ele	OK	24.8372	36.8	0.567202	2.58912	0.00065	0.00413522	yes
XLOC_030112	XLOC_030112	grsf1	chr5:44562553 44569545	wt	ele	OK	12.8265	18.7858	0.55052	1.96212	0.00065	0.00413522	yes
XLOC_009542	XLOC_009542	lim2.3	chr15:18568636 18575408	wt	ele	OK	23.8212	34.786	0.546263	1.90028	0.00065	0.00413522	yes
XLOC_013731	XLOC_013731	kcnk6	chr18:44578736 44592007	wt	ele	OK	3.94297	5.67935	0.526444	1.9493	0.00065	0.00413522	yes
XLOC_013350	XLOC_013350	dhdhl	chr18:769932 776803	wt	ele	OK	25.8489	36.6696	0.50448	2.01406	0.00065	0.00413522	yes
XLOC_003291	XLOC_003291	anxa4	chr10:42533961 42567602	wt	ele	OK	38.8512	54.0312	0.475832	1.97675	0.00065	0.00413522	yes
XLOC_007853	XLOC_007853	sb:cb252	chr14:11656146 11659628	wt	ele	OK	85.8673	115.757	0.430913	1.85711	0.00065	0.00413522	yes
XLOC_025744	XLOC_025744	ba1	chr3:55950129 55957631	wt	ele	OK	0.214695	48.5578	7.82127	3.7992	0.0007	0.00440717	yes
XLOC_010567	XLOC_010567	si:ch211 261b22.2	chr16:43607311 43611332	wt	ele	OK	0.104349	1.39582	3.74163	3.77037	0.0007	0.00440717	yes
XLOC_002615	XLOC_002615		chr1:59779444 59779993	wt	ele	OK	1.66988	10.1138	2.59851	2.52446	0.0007	0.00440717	yes
XLOC_015785	XLOC_015785		chr2:45160771 45175033	wt	ele	OK	0.276637	1.58652	2.5198	3.19651	0.0007	0.00440717	yes
XLOC_014993	XLOC_014993	dclk3	chr19:44541160 44555925	wt	ele	OK	0.495597	1.31882	1.41201	1.91454	0.0007	0.00440717	yes
XLOC_027806	XLOC_027806	si:ch211 271g18.4	chr4:36569894 36578464	wt	ele	OK	1.82641	4.3766	1.2608	2.23569	0.0007	0.00440717	yes
XLOC_009052	XLOC_009052		chr15:20874923 20907130	wt	ele	OK	0.630219	1.48262	1.23422	2.05871	0.0007	0.00440717	yes
XLOC_008173	XLOC_008173	si:ch211 89f22.1	chr14:49797992 49801740	wt	ele	OK	2.94688	6.42618	1.12478	2.75277	0.0007	0.00440717	yes
XLOC_028176	XLOC_028176	si:dkey 14o6.7	chr4:48718444 48786306	wt	ele	OK	1.65127	3.59676	1.12312	2.31461	0.0007	0.00440717	yes
XLOC_036620	XLOC_036620	dhrs9	chr9:49753357 49783501	wt	ele	OK	2.19144	4.54634	1.05282	2.48443	0.0007	0.00440717	yes
XLOC_016431	XLOC_016431		chr2:37534686 37536097	wt	ele	OK	2.22009	4.58094	1.04503	2.44501	0.0007	0.00440717	yes
XLOC_000640	XLOC_000640		Zv9_NA926:8197 42541	wt	ele	OK	2.78444	4.93629	0.826038	2.22837	0.0007	0.00440717	yes
XLOC_029699	XLOC_029699	nf2a	chr5:12815550 12897853	wt	ele	OK	2.19056	3.7718	0.783953	1.98269	0.0007	0.00440717	yes
XLOC_018339	XLOC_018339		chr20:53944795 53952369	wt	ele	OK	0.864216	1.4229	0.719366	2.06527	0.0007	0.00440717	yes
XLOC_010998	XLOC_010998		chr16:25578686 25585417	wt	ele	OK	16.1045	26.1379	0.698685	2.70455	0.0007	0.00440717	yes
XLOC_003119	XLOC_003119	ptrh2	chr10:28988529 28991098	wt	ele	OK	10.6361	16.8678	0.665309	2.03587	0.0007	0.00440717	yes
XLOC_012528	XLOC_012528	si:ch211 198j3.1	chr17:40557678 40757083	wt	ele	OK	10.633	16.6182	0.644212	2.19302	0.0007	0.00440717	yes
XLOC_029068	XLOC_029068	zzef1	chr5:32675896 32748976	wt	ele	OK	4.34207	6.76084	0.638819	1.94387	0.0007	0.00440717	yes
XLOC_014437	XLOC_014437	CLSPN	chr19:49560265 49563702	wt	ele	OK	18.7006	28.3147	0.598464	2.55455	0.0007	0.00440717	yes
XLOC_012870	XLOC_012870	bloc1s6	chr18:4930291 4933883	wt	ele	OK	25.5843	36.949	0.530274	1.93516	0.0007	0.00440717	yes
XLOC_006687	XLOC_006687	pcbd1	chr13:25944858 25950424	wt	ele	OK	40.3756	56.9074	0.495134	2.47063	0.0007	0.00440717	yes
XLOC_022162	XLOC_022162		chr23:41886593 41888311	wt	ele	OK	0.109939	1.57352	3.83922	3.86524	0.00075	0.00467724	yes
XLOC_024179	XLOC_024179		chr25:37523232 37525203	wt	ele	OK	0.13255	1.06117	3.00104	3.16261	0.00075	0.00467724	yes
XLOC_032943	XLOC_032943	spata6l	chr7:72195885 72211542	wt	ele	OK	0.798535	4.26334	2.41656	1.87327	0.00075	0.00467724	yes
XLOC_003167	XLOC_003167	rxfp2b	chr10:34772379 34895815	wt	ele	OK	0.232344	0.72407	1.63987	2.01183	0.00075	0.00467724	yes
XLOC_025048	XLOC_025048	si:dkey 88j15.5	chr3:3187105 3191292	wt	ele	OK	4.96008	9.99479	1.01081	2.04053	0.00075	0.00467724	yes
XLOC_003953	XLOC_003953		chr10:44029038 44029838	wt	ele	OK	7.26038	12.66	0.802157	2.59114	0.00075	0.00467724	yes
XLOC_001962	XLOC_001962	fn1b	chr1:4326543 4432293	wt	ele	OK	24.051	40.4468	0.749928	2.02043	0.00075	0.00467724	yes
XLOC_020351	XLOC_020351	zgc:101000	chr22:5587615 5606581	wt	ele	OK	52.5956	85.7295	0.704849	1.90362	0.00075	0.00467724	yes
XLOC_022593	XLOC_022593	CABZ01044085.1	chr24:43450223 43542738	wt	ele	OK	16.6991	26.7712	0.680912	1.97007	0.00075	0.00467724	yes
XLOC_030396	XLOC_030396	traf2b	chr5:62989953 63023172	wt	ele	OK	4.00097	6.03675	0.593423	1.84991	0.00075	0.00467724	yes
XLOC_026137	XLOC_026137	srgap2b	chr4:8351356 8407222	wt	ele	OK	3.39951	5.02545	0.563925	2.01777	0.00075	0.00467724	yes
XLOC_022361	XLOC_022361	acaa1	chr24:20933763 20940912	wt	ele	OK	11.1867	15.9753	0.514061	2.09784	0.00075	0.00467724	yes
XLOC_008443	XLOC_008443	slc26a2	chr14:26447687 26462056	wt	ele	OK	5.24937	7.41999	0.499273	1.90381	0.00075	0.00467724	yes
XLOC_025580	XLOC_025580	nde1	chr3:36505748 36519378	wt	ele	OK	9.26874	13.0941	0.498472	1.9511	0.00075	0.00467724	yes
XLOC_021066	XLOC_021066	krt18	chr23:10454076 10457982	wt	ele	OK	144.594	199.362	0.463387	1.98709	0.00075	0.00467724	yes
XLOC_004711	XLOC_004711	lrig1	chr11:16714441 16780542	wt	ele	OK	9.31085	12.7619	0.454862	1.93017	0.00075	0.00467724	yes
XLOC_010713	XLOC_010713	xrcc1	chr16:57735785 57772473	wt	ele	OK	18.7167	25.641	0.454125	2.0591	0.00075	0.00467724	yes
XLOC_016318	XLOC_016318	cahz	chr2:29192214 29200240	wt	ele	OK	80.0957	108.828	0.442249	1.93939	0.00075	0.00467724	yes
XLOC_024136	XLOC_024136		chr25:13468500 13470017	wt	ele	OK	0.141604	2.32684	4.03844	4.05386	0.0008	0.00494223	yes
XLOC_003184	XLOC_003184	styxl1	chr10:36281088 36285806	wt	ele	OK	0.287179	1.68573	2.55335	3.24995	0.0008	0.00494223	yes
XLOC_023166	XLOC_023166		chr24:43845594 43846011	wt	ele	OK	1.43494	7.29961	2.34682	4.57579	0.0008	0.00494223	yes
XLOC_032604	XLOC_032604	wdr76	chr7:31538154 31568430	wt	ele	OK	3.29888	10.0638	1.60912	2.58326	0.0008	0.00494223	yes
XLOC_025115	XLOC_025115	PKN1	chr3:6340297 6391294	wt	ele	OK	0.551047	1.32753	1.2685	2.29228	0.0008	0.00494223	yes
XLOC_004054	XLOC_004054	gtpbp3	chr11:6044738 6072321	wt	ele	OK	0.829104	1.97403	1.25152	2.34908	0.0008	0.00494223	yes
XLOC_007780	XLOC_007780	MLF1IP	chr14:4616737 4630219	wt	ele	OK	2.0635	4.26643	1.04794	2.03178	0.0008	0.00494223	yes
XLOC_007919	XLOC_007919	lygl1	chr14:21894202 21899766	wt	ele	OK	5.70346	10.1874	0.836873	1.96596	0.0008	0.00494223	yes
XLOC_035301	XLOC_035301	fam110a	chr8:51464536 51476947	wt	ele	OK	2.44822	4.15997	0.764838	1.88473	0.0008	0.00494223	yes
XLOC_025768	XLOC_025768	syngr2a	chr3:58580517 58593709	wt	ele	OK	4.19569	7.05987	0.750733	1.90593	0.0008	0.00494223	yes
XLOC_012242	XLOC_012242	adpgk2	chr17:11305194 11329798	wt	ele	OK	0.745393	1.24455	0.739551	2.03337	0.0008	0.00494223	yes
XLOC_004461	XLOC_004461		chr11:46301752 46303144	wt	ele	OK	14.5906	24.1228	0.725358	2.85636	0.0008	0.00494223	yes
XLOC_012052	XLOC_012052	CU694445.1	chr17:49838892 49975823	wt	ele	OK	2.12713	3.26918	0.620022	1.95769	0.0008	0.00494223	yes
XLOC_034924	XLOC_034924	si:ch211 120j21.1	chr8:20339825 20442269	wt	ele	OK	4.5743	6.94736	0.602912	1.93318	0.0008	0.00494223	yes
XLOC_004090	XLOC_004090	PLA2R1	chr11:11085753 11176586	wt	ele	OK	2.14133	3.21321	0.585509	1.87887	0.0008	0.00494223	yes
XLOC_031895	XLOC_031895	BX323459.1	chr6:49602544 49624774	wt	ele	OK	4.91103	7.26318	0.564575	2.0601	0.0008	0.00494223	yes
XLOC_032690	XLOC_032690	mdka	chr7:40558561 40569729	wt	ele	OK	275.593	389.347	0.498519	1.95968	0.0008	0.00494223	yes
XLOC_005616	XLOC_005616	rpl38	chr12:40099734 40105115	wt	ele	OK	469.997	660.43	0.490753	1.94579	0.0008	0.00494223	yes
XLOC_020291	XLOC_020291	lmnb2	chr22:1189219 1220491	wt	ele	OK	36.8827	49.8061	0.43338	1.88549	0.0008	0.00494223	yes
XLOC_013171	XLOC_013171	si:dkey 145c18.5	chr18:31942902 31963796	wt	ele	OK	0.283043	1.81098	2.67768	1.78855	0.00085	0.00519023	yes
XLOC_009468	XLOC_009468	si:dkey 13m3.1	chr15:11107552 11112518	wt	ele	OK	0.5068	2.44627	2.2711	3.16735	0.00085	0.00519023	yes
XLOC_017372	XLOC_017372	TDRD15	chr20:42569198 42593471	wt	ele	OK	0.29667	1.08188	1.86661	1.18316	0.00085	0.00519023	yes
XLOC_019508	XLOC_019508		chr21:8731944 8733231	wt	ele	OK	0.724614	2.03732	1.49139	2.52113	0.00085	0.00519023	yes
XLOC_026893	XLOC_026893	ZNF768	chr4:51178371 51181301	wt	ele	OK	1.57784	3.3951	1.1055	2.1354	0.00085	0.00519023	yes
XLOC_036020	XLOC_036020	CU855890.3	chr9:49011562 49027423	wt	ele	OK	10.0992	17.5844	0.800058	2.80371	0.00085	0.00519023	yes
XLOC_032747	XLOC_032747	plekhf1	chr7:47585059 47586479	wt	ele	OK	5.23514	8.8792	0.762201	2.37635	0.00085	0.00519023	yes
XLOC_009466	XLOC_009466	prcp	chr15:10332012 10424554	wt	ele	OK	4.93979	7.75985	0.651578	2.09333	0.00085	0.00519023	yes
XLOC_027909	XLOC_027909	BX927253.1	chr4:39572879 39579311	wt	ele	OK	3.35445	4.97515	0.568663	1.97034	0.00085	0.00519023	yes
XLOC_000609	XLOC_000609		Zv9_NA915:106989 114854	wt	ele	OK	12.6559	18.5503	0.551631	2.23288	0.00085	0.00519023	yes
XLOC_022498	XLOC_022498		chr24:35828848 35831235	wt	ele	OK	10.1688	14.8919	0.550376	1.98836	0.00085	0.00519023	yes
XLOC_005258	XLOC_005258	noc3l	chr12:6367941 6386602	wt	ele	OK	12.0057	17.231	0.52129	1.94626	0.00085	0.00519023	yes
XLOC_031012	XLOC_031012	evpla	chr6:21643301 21667741	wt	ele	OK	10.0191	14.2319	0.506375	1.93777	0.00085	0.00519023	yes
XLOC_024786	XLOC_024786	lfng	chr3:41912280 41921651	wt	ele	OK	56.3089	79.6581	0.500458	1.93145	0.00085	0.00519023	yes
XLOC_004385	XLOC_004385	snrpe	chr11:38886327 38891977	wt	ele	OK	115.431	158.626	0.458593	2.79911	0.00085	0.00519023	yes
XLOC_024834	XLOC_024834	pmp22a	chr3:48058194 48062098	wt	ele	OK	150.234	202.354	0.429668	1.87282	0.00085	0.00519023	yes
XLOC_010882	XLOC_010882	UBE2S	chr16:15424188 15432113	wt	ele	OK	31.6823	42.4491	0.422056	1.97385	0.00085	0.00519023	yes
XLOC_000442	XLOC_000442		Zv9_NA719:325 19145	wt	ele	OK	0.0558852	1.90112	5.08824	3.18731	0.0009	0.00542979	yes
XLOC_032120	XLOC_032120		chr6:56249715 56250888	wt	ele	OK	0.511778	1.96586	1.94157	2.93601	0.0009	0.00542979	yes
XLOC_022257	XLOC_022257	XRCC2	chr24:7437936 7443561	wt	ele	OK	0.770296	2.65443	1.78492	2.92912	0.0009	0.00542979	yes
XLOC_016713	XLOC_016713		chr2:60298619 60300535	wt	ele	OK	0.571195	1.5348	1.42599	1.99207	0.0009	0.00542979	yes
XLOC_028241	XLOC_028241	BX465205.1	chr4:52740751 52750683	wt	ele	OK	0.857833	2.03367	1.24532	2.07362	0.0009	0.00542979	yes
XLOC_000529	XLOC_000529		Zv9_NA848:0 460	wt	ele	OK	4.38639	10.169	1.21307	3.25691	0.0009	0.00542979	yes
XLOC_002136	XLOC_002136	si:ch211 134c9.2	chr1:20556617 20558296	wt	ele	OK	3.6769	8.51802	1.21203	3.06834	0.0009	0.00542979	yes
XLOC_006875	XLOC_006875	si:ch211 62a1.1	chr13:46407833 46411346	wt	ele	OK	2.26212	5.00614	1.14602	2.08162	0.0009	0.00542979	yes
XLOC_028308	XLOC_028308	si:dkey 196n19.1	chr4:55631393 55644219	wt	ele	OK	0.755645	1.61017	1.09144	1.84365	0.0009	0.00542979	yes
XLOC_009727	XLOC_009727	agmo	chr15:33630975 33714780	wt	ele	OK	1.11635	2.37644	1.09002	1.98479	0.0009	0.00542979	yes
XLOC_025643	XLOC_025643	nudt1	chr3:42115947 42120531	wt	ele	OK	3.5362	6.41288	0.858773	2.02691	0.0009	0.00542979	yes
XLOC_007325	XLOC_007325	si:dkey 157l19.2	chr13:36391864 36436237	wt	ele	OK	2.86038	4.8338	0.75695	2.04723	0.0009	0.00542979	yes
XLOC_021291	XLOC_021291	masp2	chr23:29013116 29039049	wt	ele	OK	4.01147	6.24708	0.639051	1.90961	0.0009	0.00542979	yes
XLOC_035911	XLOC_035911	si:ch211 218d20.13	chr9:35342163 35349636	wt	ele	OK	20.4822	31.421	0.617355	2.42982	0.0009	0.00542979	yes
XLOC_024935	XLOC_024935	SDR42E2	chr3:59245722 59289477	wt	ele	OK	2.20023	3.3203	0.593659	1.91454	0.0009	0.00542979	yes
XLOC_024994	XLOC_024994	amdhd2	chr3:50995 72190	wt	ele	OK	7.66977	11.4267	0.575158	1.95062	0.0009	0.00542979	yes
XLOC_029842	XLOC_029842	eif1axa	chr5:25671532 25677995	wt	ele	OK	34.1184	48.0663	0.494474	1.95532	0.0009	0.00542979	yes
XLOC_017663	XLOC_017663	glrx5	chr20:10671100 10675037	wt	ele	OK	39.7473	55.6349	0.485132	2.40495	0.0009	0.00542979	yes
XLOC_009545	XLOC_009545	AUTS2	chr15:18966407 18988884	wt	ele	OK	9.60392	13.3735	0.47768	1.88035	0.0009	0.00542979	yes
XLOC_003705	XLOC_003705	pom121	chr10:36189883 36209776	wt	ele	OK	11.1056	15.4016	0.471796	1.91011	0.0009	0.00542979	yes
XLOC_026451	XLOC_026451	si:dkey 16p6.1	chr4:32235264 32271948	wt	ele	OK	0.675859	2.68693	1.99116	2.38984	0.00095	0.00567796	yes
XLOC_028987	XLOC_028987	bco2l	chr5:27765941 27775076	wt	ele	OK	0.229891	0.909341	1.98387	2.61323	0.00095	0.00567796	yes
XLOC_007323	XLOC_007323	zgc:153911	chr13:36375960 36378585	wt	ele	OK	0.44102	1.34995	1.61399	2.46213	0.00095	0.00567796	yes
XLOC_024403	XLOC_024403		chr3:14062563 14066362	wt	ele	OK	0.321573	0.946792	1.5579	2.32527	0.00095	0.00567796	yes
XLOC_003554	XLOC_003554	ponzr2	chr10:22324040 22328152	wt	ele	OK	2.45295	7.03788	1.52062	2.02374	0.00095	0.00567796	yes
XLOC_035972	XLOC_035972	IKZF2	chr9:41029556 41040651	wt	ele	OK	2.0996	3.76038	0.840766	1.97948	0.00095	0.00567796	yes
XLOC_006190	XLOC_006190		chr12:46100714 46117903	wt	ele	OK	1.26621	2.25403	0.831982	1.94609	0.00095	0.00567796	yes
XLOC_021417	XLOC_021417	tmco4	chr23:39841552 39876451	wt	ele	OK	1.96141	3.45702	0.817642	1.84661	0.00095	0.00567796	yes
XLOC_032749	XLOC_032749	ccne1	chr7:47629354 47639396	wt	ele	OK	4.4465	7.51004	0.756151	1.97407	0.00095	0.00567796	yes
XLOC_036236	XLOC_036236	ehhadh	chr9:12704457 12719958	wt	ele	OK	3.39967	5.45645	0.682569	2.18476	0.00095	0.00567796	yes
XLOC_002293	XLOC_002293	hmgb2a	chr1:38552080 38581153	wt	ele	OK	672.078	1009.39	0.586787	1.92347	0.00095	0.00567796	yes
XLOC_017610	XLOC_017610	galca	chr20:4810615 4835214	wt	ele	OK	4.70449	7.01912	0.577253	1.96871	0.00095	0.00567796	yes
XLOC_023286	XLOC_023286	CU181898.3	chr25:8047781 8129843	wt	ele	OK	2.04264	3.04323	0.57517	1.89525	0.00095	0.00567796	yes
XLOC_024384	XLOC_024384	CCDC137	chr3:12363398 12373960	wt	ele	OK	7.15086	10.6101	0.569249	1.9063	0.00095	0.00567796	yes
XLOC_025637	XLOC_025637	cyp3c1	chr3:40964023 40971364	wt	ele	OK	9.65205	14.2528	0.562336	1.92539	0.00095	0.00567796	yes
XLOC_024819	XLOC_024819	raver1	chr3:46597751 46625119	wt	ele	OK	6.66937	9.82245	0.558533	1.977	0.00095	0.00567796	yes
XLOC_019371	XLOC_019371	dynll2b	chr21:38392295 38401717	wt	ele	OK	21.747	32.0209	0.558199	2.46824	0.00095	0.00567796	yes
XLOC_020675	XLOC_020675	capn1b capn2b	chr22:26889487 26940812	wt	ele	OK	26.1015	37.3123	0.515519	2.06559	0.00095	0.00567796	yes
XLOC_025294	XLOC_025294	sepw2b	chr3:19993030 19995518	wt	ele	OK	21.2312	30.1445	0.505708	1.90314	0.00095	0.00567796	yes
XLOC_015393	XLOC_015393	si:dkey 10f21.3	chr2:14802901 14853746	wt	ele	OK	0.501877	3.27728	2.7071	2.71371	0.001	0.00592006	yes
XLOC_013560	XLOC_013560	asz1	chr18:20423088 20454832	wt	ele	OK	0.203261	1.20264	2.5648	3.00361	0.001	0.00592006	yes
XLOC_006360	XLOC_006360		chr12:45010392 45012277	wt	ele	OK	0.16277	0.831825	2.35345	2.76496	0.001	0.00592006	yes
XLOC_024629	XLOC_024629	si:dkey 13n23.3	chr3:30652086 30655538	wt	ele	OK	0.39436	0.989843	1.32769	2.28083	0.001	0.00592006	yes
XLOC_027927	XLOC_027927	si:dkey 54i3.3_2	chr4:40804359 40867939	wt	ele	OK	1.0458	2.51217	1.26432	2.12184	0.001	0.00592006	yes
XLOC_029516	XLOC_029516	ugt2a6	chr5:72885679 72895599	wt	ele	OK	1.7204	3.79602	1.14174	2.10837	0.001	0.00592006	yes
XLOC_026653	XLOC_026653	si:dkey 220a11.10	chr4:44285975 44295069	wt	ele	OK	2.18588	4.20852	0.945099	1.99591	0.001	0.00592006	yes
XLOC_003871	XLOC_003871	gnsb	chr10:46306140 46326302	wt	ele	OK	3.49948	6.22611	0.831191	1.80107	0.001	0.00592006	yes
XLOC_002513	XLOC_002513	sertad2a	chr1:55651721 55658202	wt	ele	OK	5.93158	9.92803	0.743091	1.93539	0.001	0.00592006	yes
XLOC_022704	XLOC_022704	chmp4c	chr24:10842164 10848630	wt	ele	OK	5.43518	8.87231	0.706981	1.89876	0.001	0.00592006	yes
XLOC_026318	XLOC_026318	DEPDC4	chr4:25123914 25137028	wt	ele	OK	5.50955	8.70236	0.659473	1.98977	0.001	0.00592006	yes
XLOC_031120	XLOC_031120	orc1	chr6:33629384 33645566	wt	ele	OK	6.54391	10.1479	0.632963	1.87373	0.001	0.00592006	yes
XLOC_014922	XLOC_014922	ctnnal1	chr19:36297162 36421977	wt	ele	OK	3.24899	4.90009	0.592818	1.86068	0.001	0.00592006	yes
XLOC_032156	XLOC_032156	epdl1	chr7:1008113 1019469	wt	ele	OK	10.1503	14.7617	0.540334	2.1511	0.001	0.00592006	yes
XLOC_025373	XLOC_025373	gcat	chr3:27036865 27045042	wt	ele	OK	18.4762	25.935	0.489228	2.17498	0.001	0.00592006	yes
XLOC_020178	XLOC_020178	dag1	chr22:36012085 36078398	wt	ele	OK	32.7422	45.4119	0.471922	1.87598	0.001	0.00592006	yes
XLOC_012984	XLOC_012984	ctsd	chr18:15792762 15805249	wt	ele	OK	111.981	151.28	0.433965	1.88913	0.001	0.00592006	yes
XLOC_000520	XLOC_000520		Zv9_NA831:4369 5302	wt	ele	OK	0.256665	3.34855	3.70558	4.11245	0.00105	0.00617442	yes
XLOC_026990	XLOC_026990	BX469910.1	chr4:54963166 54969712	wt	ele	OK	0.188581	2.35961	3.64529	4.17154	0.00105	0.00617442	yes
XLOC_012200	XLOC_012200	si:ch211 278p9.3 si:ch211 278p9.4	chr17:7330227 7351451	wt	ele	OK	0.109573	1.03055	3.23345	1.54848	0.00105	0.00617442	yes
XLOC_009838	XLOC_009838	lrtomt	chr15:42956372 42965953	wt	ele	OK	0.460752	2.00122	2.11882	3.02936	0.00105	0.00617442	yes
XLOC_026678	XLOC_026678	si:dkey 72l17.6	chr4:45853745 45939686	wt	ele	OK	0.572405	1.88973	1.72307	2.33983	0.00105	0.00617442	yes
XLOC_022324	XLOC_022324	fbxo15	chr24:15558550 15573343	wt	ele	OK	0.366665	1.18724	1.69508	2.2152	0.00105	0.00617442	yes
XLOC_035612	XLOC_035612	CCDC108	chr9:7753327 7814821	wt	ele	OK	0.620704	1.51338	1.2858	1.92811	0.00105	0.00617442	yes
XLOC_022202	XLOC_022202	si:dkey 225n22.4	chr24:541585 587862	wt	ele	OK	0.579097	1.18718	1.03567	2.07062	0.00105	0.00617442	yes
XLOC_030922	XLOC_030922	CABZ01039235.1	chr6:12991547 13003187	wt	ele	OK	2.66197	4.57416	0.781013	1.97649	0.00105	0.00617442	yes
XLOC_007050	XLOC_007050	HTRA2 HTRA2 HTRA2 HTRA2 HTRA2 HTRA2 HTRA2	chr13:8415364 8665656	wt	ele	OK	6.01657	10.1334	0.752101	1.64871	0.00105	0.00617442	yes
XLOC_002172	XLOC_002172	fhdc1	chr1:24255974 24296137	wt	ele	OK	1.21102	1.92678	0.669962	1.9082	0.00105	0.00617442	yes
XLOC_032825	XLOC_032825	dhodh	chr7:57780664 57792785	wt	ele	OK	5.71325	8.99994	0.655603	2.21177	0.00105	0.00617442	yes
XLOC_012433	XLOC_012433	EHD4	chr17:29253382 29272831	wt	ele	OK	4.66727	7.22905	0.631228	1.84253	0.00105	0.00617442	yes
XLOC_009824	XLOC_009824	PRSS16	chr15:42134110 42175256	wt	ele	OK	10.3136	14.6337	0.504745	1.81828	0.00105	0.00617442	yes
XLOC_008769	XLOC_008769		chr14:21227214 21229247	wt	ele	OK	0.0956279	1.27522	3.73717	3.39239	0.0011	0.00641906	yes
XLOC_000090	XLOC_000090		Zv9_NA250:13576 20323	wt	ele	OK	0.309318	1.96547	2.66771	2.59257	0.0011	0.00641906	yes
XLOC_031550	XLOC_031550		chr6:14847901 14849357	wt	ele	OK	0.265593	1.33254	2.32689	2.82358	0.0011	0.00641906	yes
XLOC_013688	XLOC_013688	si:ch211 132b12.7	chr18:38965705 38981883	wt	ele	OK	0.348285	1.09673	1.65487	2.32447	0.0011	0.00641906	yes
XLOC_027835	XLOC_027835	si:ch211 120c15.1	chr4:37408830 37412961	wt	ele	OK	0.517948	1.29434	1.32134	2.09516	0.0011	0.00641906	yes
XLOC_012948	XLOC_012948	tat	chr18:12640430 12657213	wt	ele	OK	0.718978	1.6547	1.20255	2.25421	0.0011	0.00641906	yes
XLOC_003488	XLOC_003488	mamdc2b	chr10:15677430 15729414	wt	ele	OK	0.595657	1.32417	1.15253	1.85784	0.0011	0.00641906	yes
XLOC_034514	XLOC_034514	si:dkey 31n13.4	chr8:40822937 40835663	wt	ele	OK	0.433649	0.940399	1.11675	1.93674	0.0011	0.00641906	yes
XLOC_006905	XLOC_006905	EGLN1	chr13:50154055 50185317	wt	ele	OK	2.22657	4.44848	0.998488	2.01901	0.0011	0.00641906	yes
XLOC_012074	XLOC_012074	zgc:113142	chr17:52153516 52205532	wt	ele	OK	2.28651	4.3946	0.942587	2.254	0.0011	0.00641906	yes
XLOC_035504	XLOC_035504		chr8:54808910 54811548	wt	ele	OK	1.26057	2.35548	0.901946	2.16871	0.0011	0.00641906	yes
XLOC_022626	XLOC_022626	rreb1a	chr24:2380545 2484127	wt	ele	OK	7.40954	10.9729	0.566483	1.98057	0.0011	0.00641906	yes
XLOC_011993	XLOC_011993	peli2	chr17:44077198 44129373	wt	ele	OK	5.88325	8.55421	0.540021	1.88366	0.0011	0.00641906	yes
XLOC_033391	XLOC_033391	scube2	chr7:29905512 29947456	wt	ele	OK	6.02555	8.50601	0.497389	1.88509	0.0011	0.00641906	yes
XLOC_036459	XLOC_036459	ankrd44	chr9:33139584 33193143	wt	ele	OK	3.98324	5.53266	0.47403	1.84335	0.0011	0.00641906	yes
XLOC_035376	XLOC_035376		chr8:511018 513977	wt	ele	OK	0.0658992	0.939803	3.83403	3.49144	0.00115	0.00665512	yes
XLOC_009710	XLOC_009710		chr15:31807171 31812030	wt	ele	OK	0.437202	1.92387	2.13764	2.89439	0.00115	0.00665512	yes
XLOC_002978	XLOC_002978	si:ch211 159e21.1	chr10:18270935 18282303	wt	ele	OK	0.917871	3.74638	2.02913	2.14345	0.00115	0.00665512	yes
XLOC_022083	XLOC_022083		chr23:7535943 7537649	wt	ele	OK	0.334882	1.28941	1.94499	2.66939	0.00115	0.00665512	yes
XLOC_016151	XLOC_016151	si:dkey 228i19.32	chr2:13915344 14077366	wt	ele	OK	2.93967	8.18267	1.47692	2.3637	0.00115	0.00665512	yes
XLOC_023507	XLOC_023507	cadps2	chr25:28804288 29136657	wt	ele	OK	1.6132	3.17041	0.974743	1.72656	0.00115	0.00665512	yes
XLOC_009355	XLOC_009355	CR478286.1	chr15:1572645 1579283	wt	ele	OK	2.01986	3.92419	0.958139	2.24568	0.00115	0.00665512	yes
XLOC_020597	XLOC_020597	zbtb7a	chr22:20686538 20707328	wt	ele	OK	1.04342	1.86398	0.837069	1.90241	0.00115	0.00665512	yes
XLOC_020421	XLOC_020421		chr22:8322944 8331716	wt	ele	OK	3.54667	5.93492	0.742765	1.98764	0.00115	0.00665512	yes
XLOC_028452	XLOC_028452		chr4:11717 13148	wt	ele	OK	5.88214	9.28055	0.657871	2.19165	0.00115	0.00665512	yes
XLOC_030521	XLOC_030521	rilpl2	chr5:72824475 72834317	wt	ele	OK	5.17576	7.90239	0.610518	1.91726	0.00115	0.00665512	yes
XLOC_005874	XLOC_005874	cyp26a1	chr12:9708962 9712555	wt	ele	OK	8.30896	12.3742	0.574597	1.89564	0.00115	0.00665512	yes
XLOC_015294	XLOC_015294	aldh9a1b	chr2:5709738 5746425	wt	ele	OK	12.1246	17.4044	0.52152	2.02635	0.00115	0.00665512	yes
XLOC_031701	XLOC_031701	lepr	chr6:30876227 30947338	wt	ele	OK	3.71682	5.24807	0.497719	1.86299	0.00115	0.00665512	yes
XLOC_001406	XLOC_001406	fabp2	chr1:24705630 24708975	wt	ele	OK	95.1919	128.27	0.43027	1.83904	0.00115	0.00665512	yes
XLOC_007103	XLOC_007103	adh8b	chr13:12502379 12515909	wt	ele	OK	74.4134	99.6061	0.42067	1.98654	0.00115	0.00665512	yes
XLOC_001097	XLOC_001097		Zv9_scaffold3556:60088 63733	wt	ele	OK	0.546727	3.76407	2.7834	3.77932	0.0012	0.00689731	yes
XLOC_036320	XLOC_036320	irg1	chr9:22866972 22871390	wt	ele	OK	0.644926	1.84587	1.5171	2.13271	0.0012	0.00689731	yes
XLOC_026994	XLOC_026994	si:ch211 241n15.2	chr4:55100104 55318522	wt	ele	OK	1.0304	2.68001	1.37904	2.16629	0.0012	0.00689731	yes
XLOC_018455	XLOC_018455	TAF1C	chr21:5780195 5818929	wt	ele	OK	3.46764	6.56734	0.921356	2.0182	0.0012	0.00689731	yes
XLOC_000722	XLOC_000722		Zv9_NA979:2 1346	wt	ele	OK	12.6806	23.1613	0.869089	3.31477	0.0012	0.00689731	yes
XLOC_029522	XLOC_029522	CABZ01089223.1	chr5:73405777 73584257	wt	ele	OK	0.486231	0.830487	0.772316	1.88315	0.0012	0.00689731	yes
XLOC_017285	XLOC_017285	trmt1l	chr20:34413032 34424050	wt	ele	OK	4.71686	7.43291	0.656101	1.9035	0.0012	0.00689731	yes
XLOC_027075	XLOC_027075	ms4a17a.11	chr4:60617631 60631138	wt	ele	OK	12.8883	19.2151	0.576177	1.84288	0.0012	0.00689731	yes
XLOC_010333	XLOC_010333	flad1	chr16:25045006 25059486	wt	ele	OK	7.82094	11.2459	0.523982	1.83698	0.0012	0.00689731	yes
XLOC_019608	XLOC_019608	nuak2	chr22:483458 510623	wt	ele	OK	6.55673	9.3599	0.513516	1.84108	0.0012	0.00689731	yes
XLOC_034247	XLOC_034247	mknk2b	chr8:20976901 20990264	wt	ele	OK	21.1815	29.5291	0.479332	1.89656	0.0012	0.00689731	yes
XLOC_018007	XLOC_018007	plg	chr20:42720218 42734615	wt	ele	OK	37.9275	52.5395	0.470158	1.90606	0.0012	0.00689731	yes
XLOC_020082	XLOC_020082	rrbp1b	chr22:25559411 25582331	wt	ele	OK	33.0536	44.286	0.422043	1.86528	0.0012	0.00689731	yes
XLOC_023433	XLOC_023433	tnnt2d	chr25:20707520 20718141	wt	ele	OK	104.374	138.738	0.410605	1.80209	0.0012	0.00689731	yes
XLOC_036284	XLOC_036284	si:ch211 277p15.1	chr9:19906828 19914502	wt	ele	OK	3.08397	10.451	1.76078	1.97049	0.00125	0.00714484	yes
XLOC_025249	XLOC_025249	bckdhbl	chr3:15853950 15909807	wt	ele	OK	9.58153	23.396	1.28794	2.41485	0.00125	0.00714484	yes
XLOC_031217	XLOC_031217	gpx1b	chr6:42269718 42272629	wt	ele	OK	3.75063	7.16707	0.93425	2.4791	0.00125	0.00714484	yes
XLOC_015447	XLOC_015447	si:ch211 267e7.2	chr2:20308865 20325163	wt	ele	OK	1.00958	1.92559	0.931554	1.95344	0.00125	0.00714484	yes
XLOC_019020	XLOC_019020	PRODH	chr21:5931498 5940439	wt	ele	OK	9.2086	14.8673	0.691088	1.92381	0.00125	0.00714484	yes
XLOC_008398	XLOC_008398	mxd3	chr14:19998034 20012473	wt	ele	OK	19.5619	30.447	0.638254	1.81564	0.00125	0.00714484	yes
XLOC_022200	XLOC_022200	FP016176.1 tgfbr1b	chr24:449903 490900	wt	ele	OK	18.0687	27.7342	0.618174	1.92516	0.00125	0.00714484	yes
XLOC_032484	XLOC_032484	clcn5	chr7:24020711 24066741	wt	ele	OK	1.89328	2.88025	0.605302	1.87204	0.00125	0.00714484	yes
XLOC_009201	XLOC_009201	sesn3	chr15:34339246 34397547	wt	ele	OK	12.0981	17.3454	0.519771	1.99076	0.00125	0.00714484	yes
XLOC_013941	XLOC_013941	dennd3a	chr19:1812423 1861452	wt	ele	OK	3.07978	4.33052	0.491714	1.79642	0.00125	0.00714484	yes
XLOC_025804	XLOC_025804	PEG3	chr3:61959322 61996180	wt	ele	OK	10.6429	14.5881	0.454901	1.87304	0.00125	0.00714484	yes
XLOC_003873	XLOC_003873	il1b	chr10:46393913 46401024	wt	ele	OK	0.111604	1.28454	3.52479	3.53605	0.0013	0.00738609	yes
XLOC_034717	XLOC_034717	SH2D6	chr8:2290122 2314410	wt	ele	OK	0.306581	2.33855	2.93127	2.59033	0.0013	0.00738609	yes
XLOC_001107	XLOC_001107		Zv9_scaffold3560:32239 34379	wt	ele	OK	0.14574	0.792653	2.44329	2.7289	0.0013	0.00738609	yes
XLOC_026429	XLOC_026429	BX927290.1	chr4:30347637 30491764	wt	ele	OK	0.714778	3.76429	2.39681	2.62032	0.0013	0.00738609	yes
XLOC_013274	XLOC_013274	cngb1a	chr18:43916998 43933739	wt	ele	OK	0.191317	0.85248	2.1557	2.17393	0.0013	0.00738609	yes
XLOC_030780	XLOC_030780	si:ch73 379f7.5	chr6:359735 397918	wt	ele	OK	0.616503	1.27204	1.04497	2.04825	0.0013	0.00738609	yes
XLOC_020568	XLOC_020568	HMHA1 hmha1	chr22:17835922 17877001	wt	ele	OK	0.776374	1.4977	0.947926	1.88131	0.0013	0.00738609	yes
XLOC_011625	XLOC_011625	ADCK3	chr17:6231231 6251894	wt	ele	OK	1.95834	3.42294	0.805607	1.96071	0.0013	0.00738609	yes
XLOC_020493	XLOC_020493	KRT222	chr22:11828577 11852467	wt	ele	OK	3.75524	5.77093	0.619899	1.94294	0.0013	0.00738609	yes
XLOC_025097	XLOC_025097	CABZ01034848.1	chr3:5264124 5268940	wt	ele	OK	50.7793	76.7226	0.595412	1.86607	0.0013	0.00738609	yes
XLOC_014814	XLOC_014814	pard6gb	chr19:26184993 26258645	wt	ele	OK	6.82541	9.75893	0.515807	2.06726	0.0013	0.00738609	yes
XLOC_012764	XLOC_012764		chr17:42973479 42979296	wt	ele	OK	11.6105	15.8386	0.448012	1.92561	0.0013	0.00738609	yes
XLOC_017390	XLOC_017390	parp1	chr20:43680100 43721599	wt	ele	OK	32.396	43.8126	0.435531	1.97956	0.0013	0.00738609	yes
XLOC_032294	XLOC_032294	pnp5a	chr7:7457930 7473128	wt	ele	OK	29.3116	38.9817	0.411326	1.91758	0.0013	0.00738609	yes
XLOC_032286	XLOC_032286	zgc:112234	chr7:7179427 7253207	wt	ele	OK	1.98632	59.1736	4.89679	2.54337	0.00135	0.00762084	yes
XLOC_000193	XLOC_000193		Zv9_NA401:2720 25697	wt	ele	OK	0.101713	1.79093	4.13813	3.10092	0.00135	0.00762084	yes
XLOC_010108	XLOC_010108	foxi1	chr16:2302273 2304041	wt	ele	OK	1.77924	3.50688	0.978929	2.34061	0.00135	0.00762084	yes
XLOC_031059	XLOC_031059	BX957353.1	chr6:26627608 26653757	wt	ele	OK	1.13637	2.09183	0.880328	1.83344	0.00135	0.00762084	yes
XLOC_000335	XLOC_000335		Zv9_NA584:153 7846	wt	ele	OK	7.58312	13.246	0.804689	1.89097	0.00135	0.00762084	yes
XLOC_005972	XLOC_005972	zdhhc4	chr12:19597419 19683200	wt	ele	OK	10.4913	17.6413	0.74976	2.22825	0.00135	0.00762084	yes
XLOC_003198	XLOC_003198	smyd4	chr10:37272600 37284577	wt	ele	OK	2.54516	4.07658	0.679604	1.82834	0.00135	0.00762084	yes
XLOC_023019	XLOC_023019	ITFG3	chr24:41187611 41210377	wt	ele	OK	7.58298	11.9751	0.659204	1.87376	0.00135	0.00762084	yes
XLOC_001197	XLOC_001197	abcb6a	chr1:4998804 5024500	wt	ele	OK	1.83007	2.8794	0.65387	1.82747	0.00135	0.00762084	yes
XLOC_007866	XLOC_007866	sqstm1	chr14:14448388 14457584	wt	ele	OK	20.1887	30.2339	0.582618	2.14299	0.00135	0.00762084	yes
XLOC_016259	XLOC_016259	fitm1	chr2:23553758 23559384	wt	ele	OK	10.5136	15.4363	0.554074	1.84148	0.00135	0.00762084	yes
XLOC_014673	XLOC_014673	serinc2	chr19:14840396 14852780	wt	ele	OK	18.6324	25.7433	0.466383	1.86838	0.00135	0.00762084	yes
XLOC_013756	XLOC_013756	icln	chr18:47247678 47260280	wt	ele	OK	25.53	35.2211	0.464247	2.13735	0.00135	0.00762084	yes
XLOC_018782	XLOC_018782	hmgb3b	chr21:33085575 33095593	wt	ele	OK	32.066	43.4064	0.436861	1.80286	0.00135	0.00762084	yes
XLOC_014653	XLOC_014653	FP236813.1	chr19:12591636 12600231	wt	ele	OK	2.9972	6.73667	1.16842	1.78033	0.0014	0.00787496	yes
XLOC_026562	XLOC_026562	si:dkeyp 109b10.4	chr4:38675067 38681730	wt	ele	OK	0.86028	1.93055	1.16613	1.98074	0.0014	0.00787496	yes
XLOC_015481	XLOC_015481	mknk2a	chr2:22451601 22482596	wt	ele	OK	3.17302	5.94018	0.90465	1.87865	0.0014	0.00787496	yes
XLOC_004540	XLOC_004540	zgc:110377	chr11:3676433 3691325	wt	ele	OK	7.72207	13.0645	0.758599	1.84642	0.0014	0.00787496	yes
XLOC_034400	XLOC_034400	srxn1	chr8:29395535 29399995	wt	ele	OK	2.78281	4.52372	0.700969	1.89155	0.0014	0.00787496	yes
XLOC_017949	XLOC_017949	nsl1	chr20:37838952 37845547	wt	ele	OK	7.44501	11.7774	0.661679	2.28111	0.0014	0.00787496	yes
XLOC_008648	XLOC_008648		chr14:49155278 49163135	wt	ele	OK	6.21972	9.35166	0.588372	2.03531	0.0014	0.00787496	yes
XLOC_008679	XLOC_008679	NCBP1	chr14:53293134 53295447	wt	ele	OK	13.7161	19.0682	0.475291	1.83299	0.0014	0.00787496	yes
XLOC_010221	XLOC_010221		chr16:13337821 13350371	wt	ele	OK	0.277796	3.77564	3.76462	2.46762	0.00145	0.00810809	yes
XLOC_008570	XLOC_008570	nots	chr14:37891744 37902250	wt	ele	OK	0.215158	1.22332	2.50733	2.30376	0.00145	0.00810809	yes
XLOC_026491	XLOC_026491	si:dkey 16p19.3	chr4:34820112 34829124	wt	ele	OK	0.560405	2.5359	2.17795	2.38308	0.00145	0.00810809	yes
XLOC_012010	XLOC_012010	KCNK3	chr17:45622458 45626723	wt	ele	OK	0.361508	1.24081	1.77919	2.55481	0.00145	0.00810809	yes
XLOC_026887	XLOC_026887	si:dkey 51d8.8 si:dkey 51d8.9	chr4:50884303 50893158	wt	ele	OK	1.0783	3.62545	1.7494	1.93083	0.00145	0.00810809	yes
XLOC_026056	XLOC_026056	CU694453.2	chr4:2126936 2143568	wt	ele	OK	1.38001	2.62096	0.925418	1.90718	0.00145	0.00810809	yes
XLOC_006056	XLOC_006056	OGFOD3	chr12:29778775 29897237	wt	ele	OK	4.07473	7.46645	0.873716	1.91078	0.00145	0.00810809	yes
XLOC_021863	XLOC_021863	ENSDARG00000060394	chr23:32139928 32157923	wt	ele	OK	8.56923	15.4639	0.85167	2.08671	0.00145	0.00810809	yes
XLOC_007897	XLOC_007897	FHDC1	chr14:18706784 18728469	wt	ele	OK	1.42452	2.47305	0.795815	1.77945	0.00145	0.00810809	yes
XLOC_023845	XLOC_023845	BX323796.1	chr25:18671086 18752530	wt	ele	OK	2.25823	3.79947	0.750609	1.83542	0.00145	0.00810809	yes
XLOC_017808	XLOC_017808	akap12b	chr20:26438443 26496914	wt	ele	OK	71.3872	110.684	0.632709	1.94891	0.00145	0.00810809	yes
XLOC_014338	XLOC_014338	cdk6	chr19:41209038 41292954	wt	ele	OK	3.72011	5.62012	0.595256	1.92208	0.00145	0.00810809	yes
XLOC_010731	XLOC_010731	nr0b2a	chr16:58399648 58404669	wt	ele	OK	2.9469	4.44616	0.593362	1.80067	0.00145	0.00810809	yes
XLOC_021152	XLOC_021152	si:dkey 109j17.4	chr23:19466440 19470938	wt	ele	OK	0.580081	1.57425	1.44034	1.66603	0.0015	0.00835025	yes
XLOC_026977	XLOC_026977	si:dkey 156j15.1	chr4:54000961 54008829	wt	ele	OK	2.48727	5.85969	1.23626	1.88463	0.0015	0.00835025	yes
XLOC_012971	XLOC_012971	si:dkey 103i16.6	chr18:14858026 14915752	wt	ele	OK	1.62635	3.45841	1.08847	2.10577	0.0015	0.00835025	yes
XLOC_033157	XLOC_033157	C7H20orf27	chr7:9697047 9768574	wt	ele	OK	4.72153	7.98803	0.758586	1.97401	0.0015	0.00835025	yes
XLOC_032552	XLOC_032552	tnk1	chr7:27671369 27690652	wt	ele	OK	6.94495	10.7298	0.627583	1.85126	0.0015	0.00835025	yes
XLOC_024591	XLOC_024591		chr3:27061029 27083677	wt	ele	OK	2.15587	3.22699	0.581917	1.81844	0.0015	0.00835025	yes
XLOC_018798	XLOC_018798	mpp1	chr21:35344544 35405065	wt	ele	OK	11.1115	14.984	0.431362	1.83972	0.0015	0.00835025	yes
XLOC_011487	XLOC_011487		chr16:35668420 35669532	wt	ele	OK	0.226951	1.92535	3.08466	3.50001	0.00155	0.00858623	yes
XLOC_012732	XLOC_012732		chr17:18763581 18765346	wt	ele	OK	0.138544	1.15125	3.05479	3.03885	0.00155	0.00858623	yes
XLOC_012106	XLOC_012106	dnaaf2	chr17:4857 7774	wt	ele	OK	0.500657	1.26138	1.33311	2.02006	0.00155	0.00858623	yes
XLOC_007538	XLOC_007538		chr13:9636898 9640035	wt	ele	OK	0.35576	0.856679	1.26785	2.12386	0.00155	0.00858623	yes
XLOC_026961	XLOC_026961	ZNF135	chr4:52705749 52708641	wt	ele	OK	0.829811	1.91871	1.20928	1.95559	0.00155	0.00858623	yes
XLOC_035838	XLOC_035838	zgc:162780	chr9:29726899 29730321	wt	ele	OK	3.45293	6.25064	0.856182	1.90462	0.00155	0.00858623	yes
XLOC_020479	XLOC_020479	arhgef18b	chr22:10920609 11010930	wt	ele	OK	2.84853	4.13483	0.537608	1.90538	0.00155	0.00858623	yes
XLOC_011206	XLOC_011206	gpd1l	chr16:41914141 41933745	wt	ele	OK	11.8576	16.2385	0.453602	1.81068	0.00155	0.00858623	yes
XLOC_004055	XLOC_004055	U6	chr11:6104461 6108977	wt	ele	OK	0.436252	1.65064	1.91979	2.13222	0.0016	0.00880762	yes
XLOC_024239	XLOC_024239	ENSDARG00000044990	chr3:2115873 2124969	wt	ele	OK	2.17463	5.75228	1.40337	1.96569	0.0016	0.00880762	yes
XLOC_018280	XLOC_018280		chr20:25169235 25170213	wt	ele	OK	1.38458	3.30335	1.25449	2.39199	0.0016	0.00880762	yes
XLOC_021477	XLOC_021477	si:ch73 265d7.2	chr23:44747431 44758085	wt	ele	OK	5.38698	10.2574	0.929122	1.94722	0.0016	0.00880762	yes
XLOC_012585	XLOC_012585	kcnk5a	chr17:48839341 48861566	wt	ele	OK	1.51111	2.82585	0.903074	2.11322	0.0016	0.00880762	yes
XLOC_004860	XLOC_004860		chr11:34697254 34705136	wt	ele	OK	1.97039	3.50595	0.831322	1.9024	0.0016	0.00880762	yes
XLOC_029125	XLOC_029125	eda	chr5:38039567 38102959	wt	ele	OK	1.32949	2.26274	0.7672	1.83051	0.0016	0.00880762	yes
XLOC_029210	XLOC_029210	fancg	chr5:43115071 43128023	wt	ele	OK	2.47929	4.05191	0.708676	1.85289	0.0016	0.00880762	yes
XLOC_017155	XLOC_017155	pfas	chr20:25475369 25541791	wt	ele	OK	15.7821	25.0344	0.665624	2.10822	0.0016	0.00880762	yes
XLOC_020632	XLOC_020632	leprel1	chr22:23326670 23419137	wt	ele	OK	1.9632	3.0719	0.645923	1.8868	0.0016	0.00880762	yes
XLOC_029157	XLOC_029157	MYO1C	chr5:39376068 39417388	wt	ele	OK	2.99904	4.44038	0.566181	1.78122	0.0016	0.00880762	yes
XLOC_021322	XLOC_021322	cmyb	chr23:32053905 32068622	wt	ele	OK	6.86076	9.89271	0.527998	1.82682	0.0016	0.00880762	yes
XLOC_004169	XLOC_004169	mknk1	chr11:13362104 13375264	wt	ele	OK	6.54172	9.30521	0.508368	1.81878	0.0016	0.00880762	yes
XLOC_003117	XLOC_003117	rnft1	chr10:28842045 28850950	wt	ele	OK	9.77858	13.7036	0.48686	1.81552	0.0016	0.00880762	yes
XLOC_019421	XLOC_019421	hspa4a	chr21:41543120 41583017	wt	ele	OK	42.7757	58.6751	0.455958	1.94002	0.0016	0.00880762	yes
XLOC_027463	XLOC_027463	si:ch211 244b2.3	chr4:25169680 25183010	wt	ele	OK	0.168208	0.789578	2.23083	2.2235	0.00165	0.00902625	yes
XLOC_011391	XLOC_011391	fbxo43	chr16:58172416 58189258	wt	ele	OK	0.473325	1.1817	1.31996	1.92159	0.00165	0.00902625	yes
XLOC_026423	XLOC_026423	CR388095.3	chr4:30153057 30153930	wt	ele	OK	1.50647	3.59056	1.25304	2.45968	0.00165	0.00902625	yes
XLOC_026605	XLOC_026605	CR854899.1	chr4:41480492 41491655	wt	ele	OK	0.672009	1.36518	1.02254	2.09301	0.00165	0.00902625	yes
XLOC_000775	XLOC_000775		Zv9_scaffold3459:276654 279302	wt	ele	OK	5.1122	9.63655	0.914573	2.43932	0.00165	0.00902625	yes
XLOC_009742	XLOC_009742	zgc:55413 zgc:77118	chr15:34398713 34422613	wt	ele	OK	2.61343	4.79805	0.876505	1.88927	0.00165	0.00902625	yes
XLOC_018973	XLOC_018973		chr21:2818097 2824205	wt	ele	OK	1.5579	2.61256	0.745864	1.88329	0.00165	0.00902625	yes
XLOC_007203	XLOC_007203	mcmbp	chr13:25758873 25790198	wt	ele	OK	17.6678	28.1133	0.670133	2.10003	0.00165	0.00902625	yes
XLOC_008486	XLOC_008486	PRSS23	chr14:31672071 31678106	wt	ele	OK	9.21258	14.4931	0.653693	1.9678	0.00165	0.00902625	yes
XLOC_010730	XLOC_010730	pabpc1a	chr16:58353390 58375367	wt	ele	OK	547.297	845.152	0.626885	1.95609	0.00165	0.00902625	yes
XLOC_035744	XLOC_035744	cryl1	chr9:22416964 22433000	wt	ele	OK	9.49357	14.5119	0.612215	1.86597	0.00165	0.00902625	yes
XLOC_014284	XLOC_014284	fabp11a	chr19:33519854 33522332	wt	ele	OK	16.8733	25.6962	0.606811	2.45896	0.00165	0.00902625	yes
XLOC_028748	XLOC_028748	CT573103.1	chr5:2074646 2101007	wt	ele	OK	2.14326	3.26238	0.606117	1.84936	0.00165	0.00902625	yes
XLOC_020686	XLOC_020686	cxcl12b	chr22:27551567 27567616	wt	ele	OK	10.7192	15.099	0.49426	1.82781	0.00165	0.00902625	yes
XLOC_022354	XLOC_022354	sulf1	chr24:20067961 20136963	wt	ele	OK	15.7764	21.7989	0.46649	1.8403	0.00165	0.00902625	yes
XLOC_002195	XLOC_002195	anp32b	chr1:25626437 25630910	wt	ele	OK	162.943	218.881	0.425775	1.83213	0.00165	0.00902625	yes
XLOC_032812	XLOC_032812	cdh1	chr7:56206908 56265053	wt	ele	OK	24.2609	32.4666	0.420321	1.91427	0.00165	0.00902625	yes
XLOC_003760	XLOC_003760	igsf5	chr10:40370377 40396337	wt	ele	OK	0.479976	1.72325	1.84409	1.94837	0.0017	0.00925703	yes
XLOC_028705	XLOC_028705		chr4:59770839 59772485	wt	ele	OK	0.392324	1.23238	1.65133	2.34239	0.0017	0.00925703	yes
XLOC_028275	XLOC_028275	zgc:174704	chr4:53493979 53618392	wt	ele	OK	0.719752	2.25501	1.64756	2.38158	0.0017	0.00925703	yes
XLOC_019974	XLOC_019974	mef2b	chr22:18412131 18438843	wt	ele	OK	0.88455	2.21671	1.3254	2.12139	0.0017	0.00925703	yes
XLOC_031237	XLOC_031237	rbp7b	chr6:45869489 45870404	wt	ele	OK	3.4561	8.04876	1.21962	3.00747	0.0017	0.00925703	yes
XLOC_014722	XLOC_014722	snx10a	chr19:20253050 20264973	wt	ele	OK	1.90089	3.97068	1.06271	1.83085	0.0017	0.00925703	yes
XLOC_030848	XLOC_030848	ccdc65	chr6:7338712 7345371	wt	ele	OK	1.17979	2.44713	1.05256	1.81216	0.0017	0.00925703	yes
XLOC_021111	XLOC_021111	zgc:173570	chr23:17001780 17020233	wt	ele	OK	1.26239	2.5621	1.02118	2.15857	0.0017	0.00925703	yes
XLOC_007681	XLOC_007681	hopx	chr14:1176146 1183521	wt	ele	OK	7.85852	11.998	0.610465	2.13944	0.0017	0.00925703	yes
XLOC_012843	XLOC_012843	capn5a	chr18:2497536 2551009	wt	ele	OK	7.69307	10.8658	0.498159	1.88346	0.0017	0.00925703	yes
XLOC_018174	XLOC_018174	hsp90aa1.2	chr20:54322500 54336769	wt	ele	OK	46.959	62.6231	0.415293	1.94859	0.0017	0.00925703	yes
XLOC_036205	XLOC_036205	cbsb	chr9:9404590 9450364	wt	ele	OK	23.8166	31.5261	0.404575	1.75375	0.0017	0.00925703	yes
XLOC_011350	XLOC_011350		chr16:54499411 54501040	wt	ele	OK	1.89041	4.00577	1.08338	2.26226	0.00175	0.00947703	yes
XLOC_022643	XLOC_022643	agtr1b cpb1	chr24:4835110 4938409	wt	ele	OK	1.13268	2.39871	1.08252	1.72885	0.00175	0.00947703	yes
XLOC_004387	XLOC_004387	AL929022.2	chr11:39072109 39090544	wt	ele	OK	1.02399	1.99905	0.965112	1.86586	0.00175	0.00947703	yes
XLOC_028943	XLOC_028943	C5HXorf57	chr5:24619660 24652072	wt	ele	OK	3.24887	6.03098	0.892454	1.94211	0.00175	0.00947703	yes
XLOC_028406	XLOC_028406	ptprb	chr4:59499478 59598889	wt	ele	OK	8.32762	14.2888	0.778905	1.80198	0.00175	0.00947703	yes
XLOC_015639	XLOC_015639	klf4b	chr2:33044396 33046563	wt	ele	OK	3.9692	6.39079	0.687147	2.08019	0.00175	0.00947703	yes
XLOC_000344	XLOC_000344		Zv9_NA600:2946 12211	wt	ele	OK	0.954915	1.49029	0.642148	1.87617	0.00175	0.00947703	yes
XLOC_004274	XLOC_004274	fam83d	chr11:26261760 26270480	wt	ele	OK	6.08002	8.9125	0.551756	1.71447	0.00175	0.00947703	yes
XLOC_017835	XLOC_017835	sipa1l1	chr20:28675797 28794017	wt	ele	OK	4.09393	5.71796	0.482014	1.83098	0.00175	0.00947703	yes
XLOC_031787	XLOC_031787	myl6	chr6:39805040 39824390	wt	ele	OK	33.1558	45.8646	0.468123	1.80992	0.00175	0.00947703	yes
XLOC_031015	XLOC_031015	CABZ01008011.1	chr6:22330049 22357246	wt	ele	OK	5.77969	7.9111	0.452886	1.8178	0.00175	0.00947703	yes
XLOC_023384	XLOC_023384	ELMO3	chr25:17780404 17835682	wt	ele	OK	7.97238	10.6988	0.424362	1.81838	0.00175	0.00947703	yes
XLOC_005046	XLOC_005046		chr11:8778215 8779779	wt	ele	OK	0.231637	1.19628	2.36861	2.83533	0.0018	0.00970567	yes
XLOC_014633	XLOC_014633	si:dkey 3n22.9	chr19:11415887 11463761	wt	ele	OK	1.16541	3.37321	1.53328	2.09445	0.0018	0.00970567	yes
XLOC_018523	XLOC_018523	aqp7	chr21:10434511 10460143	wt	ele	OK	0.636226	1.72245	1.43685	2.31331	0.0018	0.00970567	yes
XLOC_007010	XLOC_007010		chr13:5036594 5042467	wt	ele	OK	0.59221	1.34489	1.1833	1.96652	0.0018	0.00970567	yes
XLOC_020497	XLOC_020497	CABZ01044943.1	chr22:12326464 12381398	wt	ele	OK	3.0036	6.07907	1.01716	1.76513	0.0018	0.00970567	yes
XLOC_024478	XLOC_024478	ldlr	chr3:19121065 19145587	wt	ele	OK	0.757616	1.29162	0.769646	1.766	0.0018	0.00970567	yes
XLOC_014297	XLOC_014297	triqk	chr19:34829335 34879757	wt	ele	OK	15.7939	26.4294	0.742772	1.82873	0.0018	0.00970567	yes
XLOC_006307	XLOC_006307		chr12:17553423 17557745	wt	ele	OK	1.59184	2.52777	0.667167	1.95994	0.0018	0.00970567	yes
XLOC_012091	XLOC_012091		chr17:53773600 53782670	wt	ele	OK	3.74212	5.51681	0.55998	1.80322	0.0018	0.00970567	yes
XLOC_021049	XLOC_021049	pofut1	chr23:7750027 7783090	wt	ele	OK	13.3554	18.6815	0.484193	1.78942	0.0018	0.00970567	yes
XLOC_004806	XLOC_004806	skib	chr11:26715549 26763527	wt	ele	OK	11.3116	15.3103	0.436701	1.8035	0.0018	0.00970567	yes
XLOC_004324	XLOC_004324	ugt1b4	chr11:31171556 31205462	wt	ele	OK	25.1438	33.9891	0.434871	1.82246	0.0018	0.00970567	yes
XLOC_030480	XLOC_030480	si:dkey 251i10.2	chr5:70459295 70468093	wt	ele	OK	197.293	263.028	0.414882	1.78583	0.0018	0.00970567	yes
XLOC_024040	XLOC_024040	ENSDARG00000091446	chr25:36208688 36209000	wt	ele	OK	1.38343	11.1299	3.00812	5.87886	0.00185	0.00992783	yes
XLOC_004244	XLOC_004244	csf1a	chr11:24199535 24231571	wt	ele	OK	2.42532	3.91995	0.692661	1.98778	0.00185	0.00992783	yes
XLOC_033525	XLOC_033525	nom1	chr7:42034786 42050504	wt	ele	OK	6.75538	9.66408	0.516596	1.81651	0.00185	0.00992783	yes
XLOC_033695	XLOC_033695	chmp5b	chr7:65549780 65570152	wt	ele	OK	36.4503	49.6814	0.446772	1.75089	0.00185	0.00992783	yes
XLOC_030378	XLOC_030378		chr5:59423976 59640888	wt	ele	OK	0.327578	3.11053	3.24725	2.89745	0.0019	0.0101433	yes
XLOC_003958	XLOC_003958		chr10:45539256 45540063	wt	ele	OK	0.360704	2.53135	2.81102	3.26204	0.0019	0.0101433	yes
XLOC_000875	XLOC_000875		Zv9_scaffold3484:109665 111217	wt	ele	OK	0.236576	1.05255	2.15351	2.56281	0.0019	0.0101433	yes
XLOC_016778	XLOC_016778		chr2:27697439 27699192	wt	ele	OK	0.230264	1.00365	2.1239	2.4856	0.0019	0.0101433	yes
XLOC_001039	XLOC_001039		Zv9_scaffold3535:176510 194529	wt	ele	OK	0.550044	2.05837	1.90388	2.66952	0.0019	0.0101433	yes
XLOC_011060	XLOC_011060	RBM12B	chr16:29789352 29809727	wt	ele	OK	3.9192	8.32775	1.08737	2.18514	0.0019	0.0101433	yes
XLOC_029407	XLOC_029407	lrwd1	chr5:64537964 64567750	wt	ele	OK	6.40033	11.0152	0.783271	1.76477	0.0019	0.0101433	yes
XLOC_012007	XLOC_012007	nenf	chr17:45563361 45570477	wt	ele	OK	8.12111	12.3156	0.600735	1.84122	0.0019	0.0101433	yes
XLOC_019150	XLOC_019150	ghrb	chr21:19570750 19593213	wt	ele	OK	3.50614	5.08667	0.536836	1.76053	0.0019	0.0101433	yes
XLOC_036185	XLOC_036185	pou3f3a	chr9:6699435 6702751	wt	ele	OK	12.1908	16.5821	0.443834	1.79506	0.0019	0.0101433	yes
XLOC_003561	XLOC_003561	PCOLCE	chr10:22989528 23003950	wt	ele	OK	27.5541	36.6991	0.41348	1.75711	0.0019	0.0101433	yes
XLOC_004603	XLOC_004603		chr11:8779845 8894420	wt	ele	OK	0.374903	2.46434	2.71661	2.02309	0.00195	0.0103729	yes
XLOC_035345	XLOC_035345	CABZ01074899.1	chr8:55150277 55161733	wt	ele	OK	0.777506	1.87689	1.27142	2.20369	0.00195	0.0103729	yes
XLOC_014219	XLOC_014219	jarid2b	chr19:26456714 26644445	wt	ele	OK	0.433516	0.818612	0.917093	1.91521	0.00195	0.0103729	yes
XLOC_027290	XLOC_027290	si:dkey 222f8.3	chr4:11096496 11104869	wt	ele	OK	9.95785	16.5758	0.735174	1.79505	0.00195	0.0103729	yes
XLOC_010915	XLOC_010915	nradd	chr16:18366486 18392021	wt	ele	OK	7.97712	11.5514	0.534121	1.77884	0.00195	0.0103729	yes
XLOC_012051	XLOC_012051	ENSDARG00000086641	chr17:49792830 49810137	wt	ele	OK	3.56781	4.97175	0.478716	1.8028	0.00195	0.0103729	yes
XLOC_034319	XLOC_034319	foxp3b	chr8:24289353 24306939	wt	ele	OK	0.141287	0.99953	2.82262	1.54962	0.002	0.0105913	yes
XLOC_025840	XLOC_025840		chr3:4112983 4114716	wt	ele	OK	0.157416	0.870534	2.46731	2.63796	0.002	0.0105913	yes
XLOC_007664	XLOC_007664	fgf2	chr14:563297 565810	wt	ele	OK	12.2326	44.9115	1.87636	12.3221	0.002	0.0105913	yes
XLOC_023567	XLOC_023567		chr25:35094727 35097292	wt	ele	OK	1.36709	4.24908	1.63604	2.96863	0.002	0.0105913	yes
XLOC_029637	XLOC_029637	zgc:73226	chr5:6243429 6270967	wt	ele	OK	0.549802	1.26264	1.19947	2.12327	0.002	0.0105913	yes
XLOC_028107	XLOC_028107	CR450785.2	chr4:45853745 45939686	wt	ele	OK	1.3697	2.61524	0.933085	1.74071	0.002	0.0105913	yes
XLOC_020164	XLOC_020164	TRIM14 TRIM14	chr22:33192229 33247578	wt	ele	OK	3.69184	6.16536	0.739843	2.05174	0.002	0.0105913	yes
XLOC_004825	XLOC_004825	ece1	chr11:28796511 28927399	wt	ele	OK	6.12498	10.0102	0.708687	1.96295	0.002	0.0105913	yes
XLOC_036608	XLOC_036608	zgc:92380	chr9:48849050 48881944	wt	ele	OK	34.1161	46.1587	0.436149	1.75919	0.002	0.0105913	yes
XLOC_003158	XLOC_003158	myl10	chr10:34126652 34134708	wt	ele	OK	557.335	745.326	0.419326	2.3626	0.002	0.0105913	yes
XLOC_028445	XLOC_028445	wu:fd58b11	chr4:61874256 61880701	wt	ele	OK	0.770404	2.43121	1.65799	2.09858	0.00205	0.0108054	yes
XLOC_026493	XLOC_026493	si:dkey 16p19.5	chr4:34889963 34901070	wt	ele	OK	3.8355	8.07742	1.07448	1.94233	0.00205	0.0108054	yes
XLOC_000300	XLOC_000300		Zv9_NA529:4395 41118	wt	ele	OK	8.74865	14.4238	0.721318	2.43593	0.00205	0.0108054	yes
XLOC_008488	XLOC_008488	CT573152.3	chr14:31747646 31766964	wt	ele	OK	1.97655	3.19878	0.69454	1.88921	0.00205	0.0108054	yes
XLOC_012087	XLOC_012087	dph6	chr17:53687238 53727695	wt	ele	OK	5.06104	8.08088	0.675078	1.8128	0.00205	0.0108054	yes
XLOC_029461	XLOC_029461	ptgs1	chr5:68477916 68523772	wt	ele	OK	4.65172	6.95977	0.581274	1.78825	0.00205	0.0108054	yes
XLOC_006863	XLOC_006863	dact2	chr13:44029502 44036259	wt	ele	OK	3.56331	5.24685	0.558234	1.89673	0.00205	0.0108054	yes
XLOC_029033	XLOC_029033	dpp7	chr5:30798400 30833565	wt	ele	OK	17.4744	25.2023	0.528315	1.93995	0.00205	0.0108054	yes
XLOC_004159	XLOC_004159	ap1s2	chr11:12777875 12786285	wt	ele	OK	53.3195	71.7508	0.428332	1.74317	0.00205	0.0108054	yes
XLOC_034539	XLOC_034539	zgc:152830	chr8:43276858 43294653	wt	ele	OK	49.6846	65.8318	0.405984	1.99394	0.00205	0.0108054	yes
XLOC_030629	XLOC_030629		chr5:14777815 14779428	wt	ele	OK	0.278884	1.11165	1.99497	2.54778	0.0021	0.0110272	yes
XLOC_001307	XLOC_001307		chr1:13137923 13138715	wt	ele	OK	3.19658	7.94974	1.31438	1.95096	0.0021	0.0110272	yes
XLOC_015918	XLOC_015918	loxl5b	chr2:56225102 56254977	wt	ele	OK	0.976611	2.01929	1.04799	1.87674	0.0021	0.0110272	yes
XLOC_024847	XLOC_024847	hs3st3b1a	chr3:50003389 50034716	wt	ele	OK	2.56372	4.83992	0.916743	1.81627	0.0021	0.0110272	yes
XLOC_026954	XLOC_026954	CR293532.1	chr4:52103817 52112485	wt	ele	OK	2.89383	5.32712	0.880375	1.84414	0.0021	0.0110272	yes
XLOC_007653	XLOC_007653	msxe	chr14:169035 171057	wt	ele	OK	3.32574	5.92996	0.834346	1.85453	0.0021	0.0110272	yes
XLOC_031258	XLOC_031258	SLC16A1	chr6:48917903 48989777	wt	ele	OK	1.42102	2.47995	0.803389	1.79699	0.0021	0.0110272	yes
XLOC_017586	XLOC_017586	CEBPZ cebpz	chr20:3329032 3348865	wt	ele	OK	14.5081	19.7344	0.44385	1.78258	0.0021	0.0110272	yes
XLOC_024780	XLOC_024780	arpc1b	chr3:40803792 40815394	wt	ele	OK	21.1877	28.6385	0.434727	1.77892	0.0021	0.0110272	yes
[truncated: 158 more rows]

## Sheet: log2(fold change)sorted
test_id	gene_id	gene	locus	sample_1	sample_2	status	value_1	value_2	log2(fold_change)	test_stat	p_value	q_value	significant
XLOC_033116	XLOC_033116	zgc:112234 zgc:195633	chr7:7267023 7269705	wt	ele	OK	0.130331	37.5061	8.16879	2.77351	0.0001	0.000822847	yes
XLOC_025744	XLOC_025744	ba1	chr3:55950129 55957631	wt	ele	OK	0.214695	48.5578	7.82127	3.7992	0.0007	0.00440717	yes
XLOC_024029	XLOC_024029	CABZ01086354.1	chr25:36182654 36183146	wt	ele	OK	0.681163	106.587	7.28982	11.7817	0.00035	0.00245539	yes
XLOC_032274	XLOC_032274	CU459186.1	chr7:6752133 6816929	wt	ele	OK	0.477597	65.2774	7.09465	4.46572	5e-05	0.000441468	yes
XLOC_023590	XLOC_023590	zgc:112234	chr25:36213631 36243523	wt	ele	OK	0.695124	70.7136	6.66857	6.03576	5e-05	0.000441468	yes
XLOC_023588	XLOC_023588	CR762436.2	chr25:36193391 36193839	wt	ele	OK	2.2802	227.53	6.64075	16.6575	5e-05	0.000441468	yes
XLOC_033005	XLOC_033005	si:ch211 113a14.17 zgc:171759	chr7:76858600 76861019	wt	ele	OK	1.10716	104.246	6.55698	8.93494	5e-05	0.000441468	yes
XLOC_024896	XLOC_024896	hbaa1	chr3:55950129 55957631	wt	ele	OK	0.767249	71.5711	6.54354	9.66503	5e-05	0.000441468	yes
XLOC_032280	XLOC_032280	zgc:171759	chr7:6821748 6822388	wt	ele	OK	2.16027	200.252	6.53446	15.7063	5e-05	0.000441468	yes
XLOC_032284	XLOC_032284	ENSDARG00000091313 zgc:112234	chr7:7179427 7253207	wt	ele	OK	2.6798	238.895	6.4781	4.21778	5e-05	0.000441468	yes
XLOC_032291	XLOC_032291	si:ch211 113a14.26	chr7:7255967 7256279	wt	ele	OK	0.568766	49.1243	6.43246	7.84685	0.0026	0.0131123	yes
XLOC_025121	XLOC_025121		chr3:6748684 6761576	wt	ele	OK	0.201247	17.2047	6.41769	5.74947	5e-05	0.000441468	yes
XLOC_033805	XLOC_033805	si:ch211 113a14.19	chr7:76855895 76857510	wt	ele	OK	2.78673	235.587	6.40154	7.46252	5e-05	0.000441468	yes
XLOC_023612	XLOC_023612	si:ch211 113a14.12	chr25:37321227 37406941	wt	ele	OK	20.4599	1641.71	6.32625	7.83556	5e-05	0.000441468	yes
XLOC_033118	XLOC_033118	ENSDARG00000086666 HIST1H4H zgc:112234	chr7:7280419 7284344	wt	ele	OK	4.3828	326.105	6.21734	9.27149	5e-05	0.000441468	yes
XLOC_015077	XLOC_015077		chr19:1406401 1407324	wt	ele	OK	0.0991174	7.27426	6.19752	3.89618	0.0026	0.0131123	yes
XLOC_033800	XLOC_033800	si:ch211 113a14.19	chr7:76847278 76848026	wt	ele	OK	2.05749	150.085	6.18876	6.4538	5e-05	0.000441468	yes
XLOC_032283	XLOC_032283	CU457819.2 CU457819.3 zgc:112234	chr7:7179427 7253207	wt	ele	OK	0.729219	52.6935	6.17513	2.33374	5e-05	0.000441468	yes
XLOC_024030	XLOC_024030	CABZ01086354.1	chr25:36184798 36185776	wt	ele	OK	1.76302	122.424	6.11769	13.1479	5e-05	0.000441468	yes
XLOC_032276	XLOC_032276	zgc:171759	chr7:6752133 6816929	wt	ele	OK	4.7218	327.739	6.11707	13.673	5e-05	0.000441468	yes
XLOC_023619	XLOC_023619	si:ch211 113a14.23 si:ch211 113a14.29	chr25:37321227 37406941	wt	ele	OK	2.54797	168.492	6.04719	2.74548	0.0004	0.00274441	yes
XLOC_033840	XLOC_033840		chr7:6872338 6875261	wt	ele	OK	0.0721357	4.75019	6.04113	6.10735	0.00055	0.00359953	yes
XLOC_033804	XLOC_033804	si:ch211 113a14.14	chr7:76853846 76855710	wt	ele	OK	5.38534	353.38	6.03604	12.0134	5e-05	0.000441468	yes
XLOC_033117	XLOC_033117	FP325123.1	chr7:7269905 7271457	wt	ele	OK	2.57342	155.433	5.91646	8.46348	5e-05	0.000441468	yes
XLOC_023616	XLOC_023616	H2AFX si:ch211 113a14.18 si:ch211 113a14.19 si:ch211 113a14.29 zgc:173652	chr25:37321227 37406941	wt	ele	OK	8.27999	497.737	5.90961	4.09512	5e-05	0.000441468	yes
XLOC_024041	XLOC_024041	hist2h3c	chr25:36211444 36212266	wt	ele	OK	0.428463	24.857	5.85834	8.07717	0.00015	0.00117124	yes
XLOC_016539	XLOC_016539	mir181b 1	chr2:45250119 45253511	wt	ele	OK	1.99429	114.61	5.84471	10.7191	5e-05	0.000441468	yes
XLOC_032285	XLOC_032285	CU457819.2 zgc:114037	chr7:7179427 7253207	wt	ele	OK	7.61538	437.035	5.84269	7.28668	5e-05	0.000441468	yes
XLOC_033001	XLOC_033001	si:ch211 113a14.19 wu:fe38f03 zgc:163061 zgc:173552	chr7:76822429 76828385	wt	ele	OK	3.65654	208.262	5.83177	7.16817	5e-05	0.000441468	yes
XLOC_023589	XLOC_023589	H2AFX	chr25:36194693 36195092	wt	ele	OK	1.47366	82.534	5.80752	11.5703	5e-05	0.000441468	yes
XLOC_023582	XLOC_023582	CU302436.2 CU302436.3 HIST2H3D hist2h3c zgc:112234	chr25:36106411 36181919	wt	ele	OK	29.5418	1631.02	5.78688	5.53379	5e-05	0.000441468	yes
XLOC_032292	XLOC_032292	zgc:112234	chr7:7280419 7284344	wt	ele	OK	1.37888	72.2716	5.71186	10.4893	5e-05	0.000441468	yes
XLOC_033120	XLOC_033120	zgc:114037	chr7:7285383 7287762	wt	ele	OK	1.25904	64.4559	5.67792	5.06414	5e-05	0.000441468	yes
XLOC_033003	XLOC_033003	si:ch211 113a14.19	chr7:76847278 76848026	wt	ele	OK	1.60432	80.7594	5.6536	9.6001	5e-05	0.000441468	yes
XLOC_026988	XLOC_026988	si:dkey 149m13.1	chr4:54829812 54839184	wt	ele	OK	0.466694	22.6028	5.59788	7.81808	5e-05	0.000441468	yes
XLOC_024036	XLOC_024036	CR762436.1	chr25:36202829 36203429	wt	ele	OK	0.757361	35.8375	5.56435	9.12426	5e-05	0.000441468	yes
XLOC_024023	XLOC_024023	PGBD4	chr25:36106411 36181919	wt	ele	OK	3.46735	162.653	5.55182	6.02125	5e-05	0.000441468	yes
XLOC_006938	XLOC_006938	5S_rRNA	chr13:53800340 53801811	wt	ele	OK	0.679264	30.5687	5.49194	3.90012	5e-05	0.000441468	yes
XLOC_033119	XLOC_033119	zgc:112234	chr7:7280419 7284344	wt	ele	OK	2.48814	108.898	5.45177	9.39976	5e-05	0.000441468	yes
XLOC_033801	XLOC_033801	zgc:163061	chr7:76848732 76849489	wt	ele	OK	4.14925	175.629	5.40354	16.4899	5e-05	0.000441468	yes
XLOC_033799	XLOC_033799	si:ch211 113a14.14	chr7:76846356 76846767	wt	ele	OK	0.715629	29.2741	5.35427	8.66614	0.0006	0.0038638	yes
XLOC_032290	XLOC_032290	zgc:112234	chr7:7179427 7253207	wt	ele	OK	1.96584	80.3813	5.35365	2.34633	5e-05	0.000441468	yes
XLOC_024018	XLOC_024018	zgc:112234	chr25:36105240 36106017	wt	ele	OK	5.23621	195.957	5.22587	10.1645	5e-05	0.000441468	yes
XLOC_032277	XLOC_032277	HIST1H4J si:ch211 113a14.10 zgc:112234	chr7:6752133 6816929	wt	ele	OK	3.56364	131.184	5.20209	4.54437	5e-05	0.000441468	yes
XLOC_000442	XLOC_000442		Zv9_NA719:325 19145	wt	ele	OK	0.0558852	1.90112	5.08824	3.18731	0.0009	0.00542979	yes
XLOC_033123	XLOC_033123	zgc:110425	chr7:7292642 7293938	wt	ele	OK	0.537253	17.7705	5.04774	8.83352	5e-05	0.000441468	yes
XLOC_034449	XLOC_034449	RBBP6	chr8:35264282 35265416	wt	ele	OK	0.719148	22.9325	4.99496	7.86856	0.00015	0.00117124	yes
XLOC_032286	XLOC_032286	zgc:112234	chr7:7179427 7253207	wt	ele	OK	1.98632	59.1736	4.89679	2.54337	0.00135	0.00762084	yes
XLOC_032279	XLOC_032279	zgc:195633	chr7:6819341 6819725	wt	ele	OK	1.06724	28.104	4.71881	8.19946	0.00055	0.00359953	yes
XLOC_024033	XLOC_024033	HIST1H2BA	chr25:36196950 36197659	wt	ele	OK	4.02507	104.096	4.69276	9.19252	5e-05	0.000441468	yes
XLOC_034108	XLOC_034108		chr8:6614514 6616300	wt	ele	OK	0.183684	4.72259	4.68428	3.42551	0.0026	0.0131123	yes
XLOC_033000	XLOC_033000	si:ch211 113a14.14 zgc:171759	chr7:76814612 76821593	wt	ele	OK	2.76869	69.2886	4.64534	12.3408	5e-05	0.000441468	yes
XLOC_001433	XLOC_001433	RBBP6	chr1:28104836 28111290	wt	ele	OK	2.31355	57.5357	4.63628	10.5737	5e-05	0.000441468	yes
XLOC_006606	XLOC_006606	CABZ01032351.1	chr13:19151297 19210069	wt	ele	OK	0.535143	13.1978	4.62424	5.62592	5e-05	0.000441468	yes
XLOC_033121	XLOC_033121	wu:fe11b02	chr7:7288538 7289624	wt	ele	OK	1.93595	43.6983	4.49646	10.7801	5e-05	0.000441468	yes
XLOC_035109	XLOC_035109	si:ch211 242m24.8	chr8:37637965 37655274	wt	ele	OK	0.0781405	1.66748	4.41545	4.36044	5e-05	0.000441468	yes
XLOC_028345	XLOC_028345	si:dkey 9p20.24	chr4:56541515 56560021	wt	ele	OK	0.168541	3.57177	4.40547	2.70556	0.00035	0.00245539	yes
XLOC_036401	XLOC_036401	RBBP6	chr9:28784086 28823963	wt	ele	OK	0.117418	2.48007	4.40065	1.02128	0.00045	0.00304428	yes
XLOC_032269	XLOC_032269	zgc:195633	chr7:6747892 6750195	wt	ele	OK	0.415178	8.68509	4.38674	2.61329	0.0005	0.0033237	yes
XLOC_017779	XLOC_017779	si:dkey 273g18.1	chr20:24477613 24484536	wt	ele	OK	0.331883	6.81365	4.35968	3.99537	5e-05	0.000441468	yes
XLOC_008361	XLOC_008361	ltc4s	chr14:14050970 14062593	wt	ele	OK	0.117083	2.32128	4.30932	3.7204	5e-05	0.000441468	yes
XLOC_031559	XLOC_031559		chr6:15917198 15929464	wt	ele	OK	0.0709879	1.38837	4.28968	5.46092	5e-05	0.000441468	yes
XLOC_028663	XLOC_028663		chr4:53970468 53977617	wt	ele	OK	0.108604	2.12245	4.28857	7.19432	5e-05	0.000441468	yes
XLOC_010254	XLOC_010254	zgc:162509	chr16:15730910 15741923	wt	ele	OK	0.221179	4.02038	4.18404	5.83857	5e-05	0.000441468	yes
XLOC_036795	XLOC_036795		chr9:52565999 52568031	wt	ele	OK	0.148626	2.63943	4.15047	4.78572	5e-05	0.000441468	yes
XLOC_000193	XLOC_000193		Zv9_NA401:2720 25697	wt	ele	OK	0.101713	1.79093	4.13813	3.10092	0.00135	0.00762084	yes
XLOC_028668	XLOC_028668		chr4:54975879 54978910	wt	ele	OK	0.0789392	1.37676	4.1244	4.56419	5e-05	0.000441468	yes
XLOC_007141	XLOC_007141	CABZ01032352.1	chr13:19151297 19210069	wt	ele	OK	1.23752	21.4374	4.11461	7.61647	5e-05	0.000441468	yes
XLOC_024136	XLOC_024136		chr25:13468500 13470017	wt	ele	OK	0.141604	2.32684	4.03844	4.05386	0.0008	0.00494223	yes
XLOC_030282	XLOC_030282		chr5:51167286 51182448	wt	ele	OK	0.70454	11.1159	3.97979	1.38933	0.0028	0.0139108	yes
XLOC_033862	XLOC_033862		chr7:9156436 9160264	wt	ele	OK	0.0715779	1.1239	3.97286	4.50179	0.0001	0.000822847	yes
XLOC_009469	XLOC_009469	si:dkey 13m3.2	chr15:11118221 11129502	wt	ele	OK	0.426318	6.62225	3.95732	2.36698	5e-05	0.000441468	yes
XLOC_016793	XLOC_016793		chr2:40518064 40518475	wt	ele	OK	0.318859	4.92131	3.94805	3.47482	0.0026	0.0131123	yes
XLOC_001115	XLOC_001115		Zv9_scaffold3561:146458 151159	wt	ele	OK	0.596074	9.15952	3.94171	9.86491	5e-05	0.000441468	yes
XLOC_028902	XLOC_028902	isg15	chr5:21895402 21896541	wt	ele	OK	0.375027	5.57812	3.89471	3.80488	0.00045	0.00304428	yes
XLOC_033002	XLOC_033002	zgc:114046	chr7:76828835 76837968	wt	ele	OK	0.395165	5.87158	3.89322	4.25787	5e-05	0.000441468	yes
XLOC_027305	XLOC_027305	b2m	chr4:11857919 11865853	wt	ele	OK	1.9009	28.0169	3.88154	7.02962	5e-05	0.000441468	yes
XLOC_027348	XLOC_027348	si:ch211 92l17.1	chr4:14671224 14884284	wt	ele	OK	1.08886	15.9793	3.87531	2.83769	0.0001	0.000822847	yes
XLOC_035433	XLOC_035433		chr8:25150175 25430508	wt	ele	OK	0.70857	10.2936	3.86069	4.38239	5e-05	0.000441468	yes
XLOC_020821	XLOC_020821	elavl2	chr22:41211939 41233405	wt	ele	OK	0.195818	2.80609	3.84098	1.98738	5e-05	0.000441468	yes
XLOC_022162	XLOC_022162		chr23:41886593 41888311	wt	ele	OK	0.109939	1.57352	3.83922	3.86524	0.00075	0.00467724	yes
XLOC_035376	XLOC_035376		chr8:511018 513977	wt	ele	OK	0.0658992	0.939803	3.83403	3.49144	0.00115	0.00665512	yes
XLOC_024127	XLOC_024127		chr25:9885031 9886621	wt	ele	OK	0.329918	4.60988	3.80455	5.54664	5e-05	0.000441468	yes
XLOC_005822	XLOC_005822	CABZ01030119.1	chr12:5161430 5168973	wt	ele	OK	0.0720507	0.996599	3.78993	2.60324	0.00015	0.00117124	yes
XLOC_031891	XLOC_031891	BX569793.1	chr6:49175541 49263085	wt	ele	OK	0.0837989	1.15508	3.78492	4.00901	5e-05	0.000441468	yes
XLOC_010221	XLOC_010221		chr16:13337821 13350371	wt	ele	OK	0.277796	3.77564	3.76462	2.46762	0.00145	0.00810809	yes
XLOC_010567	XLOC_010567	si:ch211 261b22.2	chr16:43607311 43611332	wt	ele	OK	0.104349	1.39582	3.74163	3.77037	0.0007	0.00440717	yes
XLOC_008769	XLOC_008769		chr14:21227214 21229247	wt	ele	OK	0.0956279	1.27522	3.73717	3.39239	0.0011	0.00641906	yes
XLOC_000520	XLOC_000520		Zv9_NA831:4369 5302	wt	ele	OK	0.256665	3.34855	3.70558	4.11245	0.00105	0.00617442	yes
XLOC_000215	XLOC_000215		Zv9_NA427:25577 32320	wt	ele	OK	0.164623	2.1355	3.69734	6.88779	5e-05	0.000441468	yes
XLOC_031591	XLOC_031591		chr6:19467120 19469919	wt	ele	OK	0.198847	2.49587	3.64981	3.25605	0.0001	0.000822847	yes
XLOC_014354	XLOC_014354	CU896645.1	chr19:42523473 42563363	wt	ele	OK	2.86182	35.8192	3.64573	11.4249	5e-05	0.000441468	yes
XLOC_026990	XLOC_026990	BX469910.1	chr4:54963166 54969712	wt	ele	OK	0.188581	2.35961	3.64529	4.17154	0.00105	0.00617442	yes
XLOC_012098	XLOC_012098	EXD1	chr17:53898933 53903567	wt	ele	OK	0.48881	6.08267	3.63736	4.3898	5e-05	0.000441468	yes
XLOC_034317	XLOC_034317	suv39h1a	chr8:24248411 24258839	wt	ele	OK	0.570051	7.06117	3.63075	5.84138	5e-05	0.000441468	yes
XLOC_025601	XLOC_025601	si:dkey 106c17.2	chr3:38905811 38913591	wt	ele	OK	1.25431	15.42	3.61984	4.78352	5e-05	0.000441468	yes
XLOC_024560	XLOC_024560	cbx7a	chr3:25087411 25095881	wt	ele	OK	0.819032	10.0611	3.61872	8.09153	5e-05	0.000441468	yes
XLOC_028662	XLOC_028662		chr4:53967999 53970198	wt	ele	OK	0.182582	2.21149	3.5984	4.64918	5e-05	0.000441468	yes
XLOC_020526	XLOC_020526	si:ch211 181p13.2	chr22:14508353 14969181	wt	ele	OK	0.285356	3.44199	3.59241	2.97739	0.0002	0.00151135	yes
XLOC_009265	XLOC_009265	CU655961.3	chr15:42893838 42900410	wt	ele	OK	0.17099	2.04831	3.58245	2.76734	0.00035	0.00245539	yes
XLOC_012833	XLOC_012833		chr18:1034779 1045870	wt	ele	OK	0.25583	2.99355	3.5486	6.6539	5e-05	0.000441468	yes
XLOC_030653	XLOC_030653		chr5:25749346 25753377	wt	ele	OK	0.0904735	1.04266	3.52663	4.40767	5e-05	0.000441468	yes
XLOC_003873	XLOC_003873	il1b	chr10:46393913 46401024	wt	ele	OK	0.111604	1.28454	3.52479	3.53605	0.0013	0.00738609	yes
XLOC_017820	XLOC_017820	si:dkey 85n7.7	chr20:27252455 27255485	wt	ele	OK	0.551819	6.28771	3.51027	3.03469	0.0003	0.00215436	yes
XLOC_019892	XLOC_019892		chr22:11312951 11533172	wt	ele	OK	0.315041	3.58558	3.50859	2.29162	0.0003	0.00215436	yes
XLOC_034562	XLOC_034562	piwil1	chr8:45837726 45912215	wt	ele	OK	0.583879	6.61614	3.50225	2.30614	5e-05	0.000441468	yes
XLOC_033109	XLOC_033109	CR388152.1	chr7:6910808 7107173	wt	ele	OK	0.276949	3.13389	3.50027	3.95324	5e-05	0.000441468	yes
XLOC_028399	XLOC_028399	CABZ01069012.1	chr4:59121436 59157183	wt	ele	OK	0.299201	3.38072	3.49815	4.9879	5e-05	0.000441468	yes
XLOC_033802	XLOC_033802	zgc:171759	chr7:76850948 76852496	wt	ele	OK	0.551167	6.18402	3.48798	2.55876	5e-05	0.000441468	yes
XLOC_029860	XLOC_029860	si:dkey 90a24.1	chr5:26238826 26381403	wt	ele	OK	1.67177	18.3904	3.4595	4.25109	0.00255	0.0129234	yes
XLOC_000052	XLOC_000052		Zv9_NA164:6585 7512	wt	ele	OK	0.506754	5.55502	3.45443	5.21274	5e-05	0.000441468	yes
XLOC_000301	XLOC_000301		Zv9_NA530:1451 9691	wt	ele	OK	2.84264	30.6104	3.42872	12.8505	5e-05	0.000441468	yes
XLOC_014130	XLOC_014130	si:ch211 204a13.1	chr19:17118438 17122242	wt	ele	OK	0.645439	6.91834	3.42207	6.83136	5e-05	0.000441468	yes
XLOC_000302	XLOC_000302		Zv9_NA530:10131 10678	wt	ele	OK	3.79597	40.1008	3.40109	9.56164	5e-05	0.000441468	yes
XLOC_025228	XLOC_025228	si:dkey 56d12.4	chr3:15047005 15048990	wt	ele	OK	0.827025	8.72521	3.39919	6.69743	5e-05	0.000441468	yes
XLOC_024966	XLOC_024966		chr3:61050109 61054531	wt	ele	OK	1.06711	11.2038	3.39221	7.31133	5e-05	0.000441468	yes
XLOC_010888	XLOC_010888	si:dkey 85k15.4	chr16:15720573 15730506	wt	ele	OK	0.250919	2.59402	3.3699	3.57233	5e-05	0.000441468	yes
XLOC_006690	XLOC_006690	fancl	chr13:26927786 27023227	wt	ele	OK	0.596869	6.14723	3.36445	4.12177	5e-05	0.000441468	yes
XLOC_000383	XLOC_000383		Zv9_NA668:12851 19440	wt	ele	OK	1.00106	10.2586	3.35724	10.822	5e-05	0.000441468	yes
XLOC_024043	XLOC_024043	ano9a	chr25:36213631 36243523	wt	ele	OK	0.819196	8.26892	3.33542	8.38465	5e-05	0.000441468	yes
XLOC_031459	XLOC_031459	CABZ01081674.1	chr6:7783748 7801730	wt	ele	OK	0.247628	2.47049	3.31855	1.85269	0.0001	0.000822847	yes
XLOC_024126	XLOC_024126		chr25:9883148 9884078	wt	ele	OK	0.442247	4.29511	3.27977	4.36302	0.00015	0.00117124	yes
XLOC_026999	XLOC_026999	si:dkey 196n19.2	chr4:55706443 55750936	wt	ele	OK	0.0734422	0.70621	3.26542	2.91924	0.0001	0.000822847	yes
XLOC_005097	XLOC_005097		chr11:31992081 31993942	wt	ele	OK	0.451417	4.33966	3.26505	5.65528	5e-05	0.000441468	yes
XLOC_024214	XLOC_024214	TRIM35	chr3:1560731 1567706	wt	ele	OK	0.162842	1.55713	3.25734	2.96233	0.00025	0.00183251	yes
XLOC_008806	XLOC_008806		chr14:38758334 38760649	wt	ele	OK	0.178753	1.70836	3.25657	4.26942	5e-05	0.000441468	yes
XLOC_030378	XLOC_030378		chr5:59423976 59640888	wt	ele	OK	0.327578	3.11053	3.24725	2.89745	0.0019	0.0101433	yes
XLOC_013093	XLOC_013093	si:dkeyp 84g1.3	chr18:25276566 25280306	wt	ele	OK	0.192029	1.80879	3.23563	3.43674	5e-05	0.000441468	yes
XLOC_001849	XLOC_001849	si:dkey 156m2.5	chr1:58347095 58355615	wt	ele	OK	0.111573	1.04997	3.23429	3.43199	0.0001	0.000822847	yes
XLOC_012200	XLOC_012200	si:ch211 278p9.3 si:ch211 278p9.4	chr17:7330227 7351451	wt	ele	OK	0.109573	1.03055	3.23345	1.54848	0.00105	0.00617442	yes
XLOC_021114	XLOC_021114	si:dkey 147f3.8	chr23:17059815 17088909	wt	ele	OK	7.94401	72.1806	3.18367	8.76359	5e-05	0.000441468	yes
XLOC_012566	XLOC_012566	CU695222.1	chr17:45321653 45331141	wt	ele	OK	0.193164	1.7291	3.16212	1.81811	0.00035	0.00245539	yes
XLOC_024069	XLOC_024069		chr25:37529564 37530866	wt	ele	OK	0.369746	3.29096	3.1539	4.44943	5e-05	0.000441468	yes
XLOC_023759	XLOC_023759		chr25:9888542 9892719	wt	ele	OK	0.291345	2.58172	3.14753	4.38728	5e-05	0.000441468	yes
XLOC_002416	XLOC_002416	cxcl c1c	chr1:49728562 49732289	wt	ele	OK	1.00595	8.79313	3.12781	6.21946	5e-05	0.000441468	yes
XLOC_034441	XLOC_034441		chr8:32850487 32854700	wt	ele	OK	0.124217	1.07199	3.10936	3.42558	0.0004	0.00274441	yes
XLOC_017036	XLOC_017036		chr20:12714770 12718629	wt	ele	OK	0.34135	2.9436	3.10826	4.07628	0.0003	0.00215436	yes
XLOC_001243	XLOC_001243		chr1:7669659 7673065	wt	ele	OK	0.291914	2.50826	3.10307	4.55068	5e-05	0.000441468	yes
XLOC_000377	XLOC_000377		Zv9_NA668:23352 25835	wt	ele	OK	0.150806	1.29108	3.09781	3.204	0.00015	0.00117124	yes
XLOC_018463	XLOC_018463	si:dkey 93m18.3	chr21:6117510 6120175	wt	ele	OK	0.5394	4.60415	3.09351	4.30918	0.00035	0.00245539	yes
XLOC_032392	XLOC_032392	nitr3a nitr3b	chr7:18364472 18543233	wt	ele	OK	0.493003	4.18904	3.08695	1.9463	0.00025	0.00183251	yes
XLOC_011487	XLOC_011487		chr16:35668420 35669532	wt	ele	OK	0.226951	1.92535	3.08466	3.50001	0.00155	0.00858623	yes
XLOC_000518	XLOC_000518		Zv9_NA831:32 3835	wt	ele	OK	0.268909	2.27841	3.08284	4.37145	5e-05	0.000441468	yes
XLOC_029654	XLOC_029654		chr5:8049754 8062599	wt	ele	OK	0.313618	2.63922	3.07303	5.63835	5e-05	0.000441468	yes
XLOC_000195	XLOC_000195		Zv9_NA401:28383 32218	wt	ele	OK	4.13471	34.4026	3.05666	10.0345	5e-05	0.000441468	yes
XLOC_012732	XLOC_012732		chr17:18763581 18765346	wt	ele	OK	0.138544	1.15125	3.05479	3.03885	0.00155	0.00858623	yes
XLOC_010330	XLOC_010330	si:dkey 238m4.1	chr16:24702482 24765583	wt	ele	OK	0.497597	4.12606	3.05171	3.11053	0.00025	0.00183251	yes
XLOC_013232	XLOC_013232	si:ch211 132b12.1	chr18:38849689 38863045	wt	ele	OK	0.688405	5.63761	3.03376	4.64862	5e-05	0.000441468	yes
XLOC_013430	XLOC_013430		chr18:7934027 7952191	wt	ele	OK	0.296748	2.42295	3.02945	2.47467	0.0024	0.0122682	yes
XLOC_017280	XLOC_017280	pla2g4a	chr20:34154396 34172204	wt	ele	OK	0.200664	1.63833	3.02937	3.47274	5e-05	0.000441468	yes
XLOC_025702	XLOC_025702		chr3:50351849 50543291	wt	ele	OK	1.87813	15.2085	3.01751	3.14477	5e-05	0.000441468	yes
XLOC_017652	XLOC_017652	si:busm1 180g5.7	chr20:9931532 9941260	wt	ele	OK	3.3629	27.0752	3.00919	5.50938	5e-05	0.000441468	yes
XLOC_024040	XLOC_024040	ENSDARG00000091446	chr25:36208688 36209000	wt	ele	OK	1.38343	11.1299	3.00812	5.87886	0.00185	0.00992783	yes
XLOC_008221	XLOC_008221	STAG3	chr14:213190 225470	wt	ele	OK	0.541066	4.33346	3.00165	4.08567	5e-05	0.000441468	yes
XLOC_024179	XLOC_024179		chr25:37523232 37525203	wt	ele	OK	0.13255	1.06117	3.00104	3.16261	0.00075	0.00467724	yes
XLOC_029693	XLOC_029693	si:dkey 258p11.1	chr5:11396268 11408016	wt	ele	OK	0.256766	2.04443	2.99317	2.09303	0.00035	0.00245539	yes
XLOC_017305	XLOC_017305	tdrd6	chr20:35462907 35506192	wt	ele	OK	0.270438	2.15072	2.99145	1.92124	0.0003	0.00215436	yes
XLOC_015060	XLOC_015060		chr19:49920310 49925178	wt	ele	OK	0.172929	1.36606	2.98177	3.08923	0.00015	0.00117124	yes
XLOC_028691	XLOC_028691		chr4:58937751 58939910	wt	ele	OK	0.165059	1.28823	2.96433	3.58519	0.00025	0.00183251	yes
XLOC_006080	XLOC_006080	tdrd1	chr12:31921590 31935253	wt	ele	OK	0.17306	1.34919	2.96275	2.37761	5e-05	0.000441468	yes
XLOC_022343	XLOC_022343		chr24:17872649 17873542	wt	ele	OK	0.626969	4.88731	2.96257	4.26258	0.0024	0.0122682	yes
XLOC_003957	XLOC_003957		chr10:45531680 45537639	wt	ele	OK	0.340162	2.63504	2.95353	6.24028	5e-05	0.000441468	yes
XLOC_008325	XLOC_008325	zgc:174917	chr14:11703544 11705974	wt	ele	OK	0.433221	3.35562	2.9534	4.61456	5e-05	0.000441468	yes
XLOC_005416	XLOC_005416	si:zfos 754c12.1	chr12:21845376 21853961	wt	ele	OK	0.254194	1.94596	2.93648	3.41235	5e-05	0.000441468	yes
XLOC_034717	XLOC_034717	SH2D6	chr8:2290122 2314410	wt	ele	OK	0.306581	2.33855	2.93127	2.59033	0.0013	0.00738609	yes
XLOC_028490	XLOC_028490		chr4:18249289 18251565	wt	ele	OK	0.249199	1.89234	2.9248	4.26063	5e-05	0.000441468	yes
XLOC_031785	XLOC_031785	AL954698.1	chr6:39632405 39659085	wt	ele	OK	0.418973	3.17704	2.92275	6.04164	5e-05	0.000441468	yes
XLOC_019842	XLOC_019842	si:ch211 250k18.7	chr22:9224848 9254366	wt	ele	OK	0.250307	1.8944	2.91997	3.74831	5e-05	0.000441468	yes
XLOC_036093	XLOC_036093	CU639413.2	chr9:58131993 58148376	wt	ele	OK	0.155908	1.16984	2.90754	2.21341	0.00015	0.00117124	yes
XLOC_008736	XLOC_008736		chr14:13572383 13575280	wt	ele	OK	0.235898	1.76438	2.90293	4.53088	5e-05	0.000441468	yes
XLOC_028571	XLOC_028571		chr4:36409581 36410797	wt	ele	OK	1.10142	8.20032	2.89632	6.08255	5e-05	0.000441468	yes
XLOC_001054	XLOC_001054		Zv9_scaffold3538:63419 74798	wt	ele	OK	0.80095	5.95956	2.89542	8.45336	5e-05	0.000441468	yes
XLOC_036827	XLOC_036827		chr9:57914535 57915480	wt	ele	OK	0.684481	5.06951	2.88876	4.77974	5e-05	0.000441468	yes
XLOC_021640	XLOC_021640	si:dkey 178o8.2	chr23:14520741 14527203	wt	ele	OK	0.877542	6.36092	2.8577	5.67409	5e-05	0.000441468	yes
XLOC_021966	XLOC_021966		chr23:41516694 41534954	wt	ele	OK	0.232215	1.66856	2.84507	4.01981	5e-05	0.000441468	yes
XLOC_019280	XLOC_019280	CR318595.2	chr21:28662055 28721287	wt	ele	OK	0.218707	1.56378	2.83797	3.1272	0.00285	0.014106	yes
XLOC_016218	XLOC_016218	nrn1b	chr2:20788258 20790126	wt	ele	OK	0.140211	0.999633	2.8338	2.70995	0.0029	0.0143056	yes
XLOC_031691	XLOC_031691		chr6:29540036 29544975	wt	ele	OK	0.263721	1.87248	2.82786	4.07222	5e-05	0.000441468	yes
XLOC_034319	XLOC_034319	foxp3b	chr8:24289353 24306939	wt	ele	OK	0.141287	0.99953	2.82262	1.54962	0.002	0.0105913	yes
XLOC_003958	XLOC_003958		chr10:45539256 45540063	wt	ele	OK	0.360704	2.53135	2.81102	3.26204	0.0019	0.0101433	yes
XLOC_017033	XLOC_017033	si:ch211 155o21.4	chr20:11982695 11986628	wt	ele	OK	0.354522	2.48773	2.81089	3.24865	0.00275	0.0137026	yes
XLOC_002738	XLOC_002738		chr1:60127588 60128876	wt	ele	OK	1.89854	13.2567	2.80375	7.21183	5e-05	0.000441468	yes
XLOC_033266	XLOC_033266	BX324131.3	chr7:19764401 19769134	wt	ele	OK	3.46168	24.0896	2.79886	8.9795	5e-05	0.000441468	yes
XLOC_001910	XLOC_001910		chr1:60136228 60142706	wt	ele	OK	1.65706	11.5216	2.79765	6.47612	5e-05	0.000441468	yes
XLOC_028397	XLOC_028397		chr4:58941424 58949938	wt	ele	OK	1.90406	13.189	2.79218	5.88143	5e-05	0.000441468	yes
XLOC_001097	XLOC_001097		Zv9_scaffold3556:60088 63733	wt	ele	OK	0.546727	3.76407	2.7834	3.77932	0.0012	0.00689731	yes
XLOC_001911	XLOC_001911		chr1:60142806 60153480	wt	ele	OK	2.01723	13.8762	2.78217	8.09308	5e-05	0.000441468	yes
XLOC_001909	XLOC_001909		chr1:60131249 60135744	wt	ele	OK	1.75295	12.0359	2.77949	6.2694	5e-05	0.000441468	yes
XLOC_026477	XLOC_026477	si:dkey 22h13.5	chr4:34151400 34171090	wt	ele	OK	1.0709	7.33634	2.77624	4.49875	0.00025	0.00183251	yes
XLOC_021509	XLOC_021509	btr32	chr23:46321045 46343413	wt	ele	OK	0.104905	0.71748	2.77385	2.87018	0.00025	0.00183251	yes
XLOC_000382	XLOC_000382		Zv9_NA668:11175 12747	wt	ele	OK	0.335845	2.26024	2.7506	4.04026	0.0001	0.000822847	yes
XLOC_008768	XLOC_008768		chr14:21222522 21225847	wt	ele	OK	0.267686	1.79889	2.74849	4.67385	5e-05	0.000441468	yes
XLOC_010185	XLOC_010185	si:dkey 11f7.5	chr16:10822971 10829543	wt	ele	OK	0.320326	2.13488	2.73654	1.93853	0.00215	0.0112474	yes
XLOC_013935	XLOC_013935	CABZ01073740.1	chr19:1512457 1523206	wt	ele	OK	0.453996	3.02487	2.73612	5.27979	5e-05	0.000441468	yes
XLOC_027304	XLOC_027304	irak3	chr4:11846657 11855495	wt	ele	OK	0.225704	1.49999	2.73245	3.72734	5e-05	0.000441468	yes
XLOC_019619	XLOC_019619	def6b	chr22:958381 977500	wt	ele	OK	0.616152	4.0916	2.7313	2.57838	5e-05	0.000441468	yes
XLOC_017485	XLOC_017485	si:ch73 91k6.1	chr20:51744238 51748388	wt	ele	OK	0.27117	1.79971	2.7305	3.61075	5e-05	0.000441468	yes
XLOC_025107	XLOC_025107		chr3:5910838 5915106	wt	ele	OK	0.307383	2.03554	2.7273	4.54021	5e-05	0.000441468	yes
XLOC_004603	XLOC_004603		chr11:8779845 8894420	wt	ele	OK	0.374903	2.46434	2.71661	2.02309	0.00195	0.0103729	yes
XLOC_018601	XLOC_018601	HABP4	chr21:19224719 19230567	wt	ele	OK	0.757836	4.9719	2.71384	4.1869	5e-05	0.000441468	yes
XLOC_010436	XLOC_010436	chtopb	chr16:31109316 31115241	wt	ele	OK	0.402541	2.6365	2.71142	3.7727	5e-05	0.000441468	yes
XLOC_001282	XLOC_001282	BX569798.1	chr1:10841140 10870656	wt	ele	OK	0.50787	3.32536	2.71098	2.99936	0.0001	0.000822847	yes
XLOC_015393	XLOC_015393	si:dkey 10f21.3	chr2:14802901 14853746	wt	ele	OK	0.501877	3.27728	2.7071	2.71371	0.001	0.00592006	yes
XLOC_003959	XLOC_003959		chr10:45540834 45543369	wt	ele	OK	0.43769	2.85422	2.70511	4.70059	5e-05	0.000441468	yes
XLOC_001043	XLOC_001043		Zv9_scaffold3536:197458 202654	wt	ele	OK	0.523682	3.41097	2.70342	4.0701	5e-05	0.000441468	yes
XLOC_010806	XLOC_010806	si:dkey 278k10.4 si:dkey 278k10.5	chr16:8905427 8915673	wt	ele	OK	0.36585	2.36643	2.69339	1.94905	5e-05	0.000441468	yes
XLOC_029024	XLOC_029024		chr5:30145150 30151677	wt	ele	OK	0.892723	5.75172	2.68771	6.02776	5e-05	0.000441468	yes
XLOC_033916	XLOC_033916		chr7:27190529 27191604	wt	ele	OK	0.518594	3.3347	2.68488	4.14867	0.0001	0.000822847	yes
XLOC_009198	XLOC_009198	zgc:55621	chr15:34243508 34257215	wt	ele	OK	0.215965	1.38185	2.67773	1.99138	0.0024	0.0122682	yes
XLOC_013171	XLOC_013171	si:dkey 145c18.5	chr18:31942902 31963796	wt	ele	OK	0.283043	1.81098	2.67768	1.78855	0.00085	0.00519023	yes
XLOC_029938	XLOC_029938	h2afx	chr5:32173723 32174335	wt	ele	OK	52.1816	331.597	2.66782	15.0158	5e-05	0.000441468	yes
XLOC_000090	XLOC_000090		Zv9_NA250:13576 20323	wt	ele	OK	0.309318	1.96547	2.66771	2.59257	0.0011	0.00641906	yes
XLOC_013836	XLOC_013836		chr18:19920792 19922915	wt	ele	OK	0.230275	1.45233	2.65694	3.6179	5e-05	0.000441468	yes
XLOC_025011	XLOC_025011	mhc1zaa	chr3:1106079 1128569	wt	ele	OK	1.12462	7.07339	2.65296	4.7667	5e-05	0.000441468	yes
XLOC_017923	XLOC_017923	si:dkey 30j22.5	chr20:35508677 35537540	wt	ele	OK	0.115934	0.728089	2.65082	3.24824	5e-05	0.000441468	yes
XLOC_035378	XLOC_035378		chr8:516428 543753	wt	ele	OK	0.180735	1.13224	2.64723	3.13153	0.0003	0.00215436	yes
XLOC_013034	XLOC_013034	si:ch211 117i10.10	chr18:18786773 18822315	wt	ele	OK	2.50416	15.6419	2.64301	4.32032	5e-05	0.000441468	yes
XLOC_019304	XLOC_019304	zgc:152891	chr21:29958221 29989099	wt	ele	OK	0.262485	1.62471	2.62988	4.03033	5e-05	0.000441468	yes
XLOC_033349	XLOC_033349	BX511061.2	chr7:26007361 26029062	wt	ele	OK	1.17915	7.29822	2.6298	7.84464	5e-05	0.000441468	yes
XLOC_023182	XLOC_023182	prtgb	chr25:437260 481668	wt	ele	OK	0.806242	4.97567	2.62561	5.84674	5e-05	0.000441468	yes
XLOC_025639	XLOC_025639		chr3:41525817 41530436	wt	ele	OK	1.45693	8.97955	2.62371	3.75841	5e-05	0.000441468	yes
XLOC_027408	XLOC_027408		chr4:18244673 18249167	wt	ele	OK	0.414661	2.55169	2.62145	4.24359	5e-05	0.000441468	yes
XLOC_019325	XLOC_019325	cd74b	chr21:32377027 32381287	wt	ele	OK	0.327129	1.993	2.60701	1.73617	0.00025	0.00183251	yes
XLOC_002615	XLOC_002615		chr1:59779444 59779993	wt	ele	OK	1.66988	10.1138	2.59851	2.52446	0.0007	0.00440717	yes
XLOC_032511	XLOC_032511		chr7:25740830 25749106	wt	ele	OK	0.275489	1.66373	2.59435	2.94606	0.0001	0.000822847	yes
XLOC_023490	XLOC_023490		chr25:27198296 27199277	wt	ele	OK	0.718726	4.32919	2.59058	4.04636	0.00065	0.00413522	yes
XLOC_035846	XLOC_035846	rnf17	chr9:30581937 30604536	wt	ele	OK	0.473041	2.82564	2.57854	3.78114	5e-05	0.000441468	yes
XLOC_015377	XLOC_015377		chr2:13689730 13694512	wt	ele	OK	0.205652	1.22631	2.57605	3.3192	5e-05	0.000441468	yes
XLOC_033939	XLOC_033939		chr7:47178736 47179826	wt	ele	OK	0.585893	3.48009	2.57042	3.94905	0.00025	0.00183251	yes
XLOC_013560	XLOC_013560	asz1	chr18:20423088 20454832	wt	ele	OK	0.203261	1.20264	2.5648	3.00361	0.001	0.00592006	yes
XLOC_003184	XLOC_003184	styxl1	chr10:36281088 36285806	wt	ele	OK	0.287179	1.68573	2.55335	3.24995	0.0008	0.00494223	yes
XLOC_009253	XLOC_009253		chr15:41946874 41950939	wt	ele	OK	1.07581	6.30907	2.55201	4.59808	5e-05	0.000441468	yes
XLOC_006278	XLOC_006278		chr12:2933908 2935484	wt	ele	OK	0.335524	1.96614	2.55088	3.71174	0.00015	0.00117124	yes
XLOC_030010	XLOC_030010	si:dkey 204l11.1	chr5:37141313 37158880	wt	ele	OK	1.46324	8.47278	2.53367	6.62444	5e-05	0.000441468	yes
XLOC_015785	XLOC_015785		chr2:45160771 45175033	wt	ele	OK	0.276637	1.58652	2.5198	3.19651	0.0007	0.00440717	yes
XLOC_009920	XLOC_009920		chr15:3632512 3634376	wt	ele	OK	0.474612	2.70796	2.51238	4.30677	5e-05	0.000441468	yes
XLOC_008570	XLOC_008570	nots	chr14:37891744 37902250	wt	ele	OK	0.215158	1.22332	2.50733	2.30376	0.00145	0.00810809	yes
XLOC_035839	XLOC_035839	si:dkey 253e1.1	chr9:29755383 29774232	wt	ele	OK	0.773182	4.37047	2.49891	2.44457	5e-05	0.000441468	yes
XLOC_011155	XLOC_011155	rspo1	chr16:36087311 36131543	wt	ele	OK	0.504062	2.8436	2.49604	5.12124	5e-05	0.000441468	yes
XLOC_029653	XLOC_029653	FP102192.1	chr5:8029839 8047084	wt	ele	OK	0.428789	2.415	2.49368	3.41898	5e-05	0.000441468	yes
XLOC_027084	XLOC_027084	FP015791.1	chr4:60819689 60827150	wt	ele	OK	0.786529	4.38362	2.47855	4.01364	0.0001	0.000822847	yes
XLOC_025840	XLOC_025840		chr3:4112983 4114716	wt	ele	OK	0.157416	0.870534	2.46731	2.63796	0.002	0.0105913	yes
XLOC_025841	XLOC_025841		chr3:4114776 4117664	wt	ele	OK	0.204063	1.11859	2.4546	3.49545	5e-05	0.000441468	yes
XLOC_001341	XLOC_001341	si:dkey 167i21.4	chr1:17571241 17574751	wt	ele	OK	0.447147	2.43834	2.44708	3.79889	5e-05	0.000441468	yes
XLOC_012903	XLOC_012903	si:dkey 238c7.12	chr18:7029381 7031332	wt	ele	OK	104.787	570.596	2.44501	14.7614	5e-05	0.000441468	yes
XLOC_035318	XLOC_035318	PRKACB	chr8:53175954 53208476	wt	ele	OK	0.282088	1.53529	2.4443	2.73813	0.0001	0.000822847	yes
XLOC_001107	XLOC_001107		Zv9_scaffold3560:32239 34379	wt	ele	OK	0.14574	0.792653	2.44329	2.7289	0.0013	0.00738609	yes
XLOC_025183	XLOC_025183	si:ch211 8c17.2 si:ch211 8c17.3 si:ch211 8c17.4	chr3:12414838 12438274	wt	ele	OK	0.680042	3.66336	2.42947	3.09011	5e-05	0.000441468	yes
XLOC_008129	XLOC_008129	adra1bb	chr14:45797804 45816079	wt	ele	OK	0.219039	1.1752	2.42365	3.15804	0.0006	0.0038638	yes
XLOC_002616	XLOC_002616	VAV1	chr1:59781899 59786479	wt	ele	OK	0.992584	5.32426	2.42332	4.24305	5e-05	0.000441468	yes
XLOC_024062	XLOC_024062	slc7a10b	chr25:37303416 37319174	wt	ele	OK	0.697066	3.73814	2.42295	5.02556	5e-05	0.000441468	yes
XLOC_032943	XLOC_032943	spata6l	chr7:72195885 72211542	wt	ele	OK	0.798535	4.26334	2.41656	1.87327	0.00075	0.00467724	yes
XLOC_020663	XLOC_020663	si:dkey 270e21.7	chr22:25807789 25935032	wt	ele	OK	1.8098	9.54829	2.39941	4.70945	5e-05	0.000441468	yes
XLOC_026429	XLOC_026429	BX927290.1	chr4:30347637 30491764	wt	ele	OK	0.714778	3.76429	2.39681	2.62032	0.0013	0.00738609	yes
XLOC_008897	XLOC_008897	RNF14	chr15:3613363 3632405	wt	ele	OK	4.44377	23.3931	2.39623	6.9997	5e-05	0.000441468	yes
XLOC_035055	XLOC_035055	si:ch211 103n10.5	chr8:30566733 30567435	wt	ele	OK	1.5487	8.12868	2.39196	4.98986	5e-05	0.000441468	yes
XLOC_016710	XLOC_016710	si:dkey 264b2.3	chr2:60071067 60171903	wt	ele	OK	2.73466	14.3516	2.39178	4.96425	5e-05	0.000441468	yes
XLOC_011324	XLOC_011324	si:dkey 256h2.1	chr16:50574341 50592491	wt	ele	OK	0.706741	3.69036	2.38451	4.56253	5e-05	0.000441468	yes
XLOC_008765	XLOC_008765		chr14:20981779 20983591	wt	ele	OK	0.537699	2.80533	2.3833	4.09345	5e-05	0.000441468	yes
XLOC_034695	XLOC_034695	CABZ01076121.1	chr8:516428 543753	wt	ele	OK	0.704637	3.66878	2.38035	2.11143	0.00035	0.00245539	yes
XLOC_028223	XLOC_028223	si:dkeyp 80d11.1	chr4:51617438 51655969	wt	ele	OK	0.763985	3.97345	2.37878	3.92615	5e-05	0.000441468	yes
XLOC_026471	XLOC_026471	zgc:174700	chr4:33881436 33888021	wt	ele	OK	0.304366	1.58087	2.37684	3.133	5e-05	0.000441468	yes
XLOC_020591	XLOC_020591	rxfp3.2b	chr22:20422300 20424439	wt	ele	OK	0.471307	2.44366	2.3743	3.59447	5e-05	0.000441468	yes
XLOC_014442	XLOC_014442	CU596012.1	chr19:49936945 49945482	wt	ele	OK	0.918117	4.75698	2.3733	4.03565	5e-05	0.000441468	yes
XLOC_013390	XLOC_013390	cplx3b	chr18:5067637 5086635	wt	ele	OK	3.10014	16.0567	2.37277	3.91651	5e-05	0.000441468	yes
XLOC_011867	XLOC_011867	ctsl.1	chr17:27315818 27320142	wt	ele	OK	1.11651	5.77017	2.36962	4.29892	5e-05	0.000441468	yes
XLOC_005046	XLOC_005046		chr11:8778215 8779779	wt	ele	OK	0.231637	1.19628	2.36861	2.83533	0.0018	0.00970567	yes
XLOC_036395	XLOC_036395	tex30	chr9:28427025 28429985	wt	ele	OK	1.07336	5.50722	2.3592	3.42876	5e-05	0.000441468	yes
XLOC_033833	XLOC_033833		chr7:5569101 5576505	wt	ele	OK	0.23343	1.19644	2.35768	4.84854	5e-05	0.000441468	yes
XLOC_006360	XLOC_006360		chr12:45010392 45012277	wt	ele	OK	0.16277	0.831825	2.35345	2.76496	0.001	0.00592006	yes
XLOC_023166	XLOC_023166		chr24:43845594 43846011	wt	ele	OK	1.43494	7.29961	2.34682	4.57579	0.0008	0.00494223	yes
XLOC_002737	XLOC_002737		chr1:60126609 60127485	wt	ele	OK	1.57031	7.97518	2.34446	5.0338	5e-05	0.000441468	yes
XLOC_000656	XLOC_000656		Zv9_NA933:902 3011	wt	ele	OK	2.41255	12.2223	2.34088	3.81614	5e-05	0.000441468	yes
XLOC_025602	XLOC_025602	si:dkey 106c17.1	chr3:38966482 38970137	wt	ele	OK	0.365335	1.84943	2.33979	3.61196	5e-05	0.000441468	yes
XLOC_019545	XLOC_019545		chr21:28926820 28927932	wt	ele	OK	0.27272	1.37846	2.33757	2.73962	0.00285	0.014106	yes
XLOC_020988	XLOC_020988	top1	chr23:2764488 2792128	wt	ele	OK	1.17218	5.89893	2.33126	1.66747	0.0004	0.00274441	yes
XLOC_031550	XLOC_031550		chr6:14847901 14849357	wt	ele	OK	0.265593	1.33254	2.32689	2.82358	0.0011	0.00641906	yes
XLOC_026464	XLOC_026464	zgc:174700	chr4:33088436 33113260	wt	ele	OK	0.309719	1.5372	2.31128	3.47769	5e-05	0.000441468	yes
XLOC_025636	XLOC_025636	si:dkey 21n8.3	chr3:40953578 40960763	wt	ele	OK	0.414894	2.05057	2.30521	2.25684	5e-05	0.000441468	yes
XLOC_022270	XLOC_022270	dlgap1b	chr24:8835992 9071542	wt	ele	OK	1.05449	5.17472	2.29493	4.77417	5e-05	0.000441468	yes
XLOC_016840	XLOC_016840		chr2:53215546 53217440	wt	ele	OK	0.62848	3.08112	2.29351	4.10603	5e-05	0.000441468	yes
XLOC_009594	XLOC_009594	bbc3	chr15:23098764 23115128	wt	ele	OK	1.07483	5.25843	2.29053	6.3776	5e-05	0.000441468	yes
XLOC_028273	XLOC_028273	si:ch211 152l15.4	chr4:53456593 53464880	wt	ele	OK	0.181018	0.881869	2.28443	2.26341	0.00045	0.00304428	yes
XLOC_006919	XLOC_006919	PRTG	chr13:52216808 52260664	wt	ele	OK	0.569124	2.76588	2.28092	5.47745	5e-05	0.000441468	yes
XLOC_020278	XLOC_020278	cdkn1a	chr22:577446 583142	wt	ele	OK	2.68043	12.9799	2.27575	5.30733	5e-05	0.000441468	yes
XLOC_014707	XLOC_014707	mir219 3	chr19:18441397 18445018	wt	ele	OK	0.720243	3.48055	2.27276	2.09447	5e-05	0.000441468	yes
XLOC_009468	XLOC_009468	si:dkey 13m3.1	chr15:11107552 11112518	wt	ele	OK	0.5068	2.44627	2.2711	3.16735	0.00085	0.00519023	yes
XLOC_008080	XLOC_008080	zgc:63568	chr14:37113160 37121035	wt	ele	OK	1.25711	6.0418	2.26487	4.73327	5e-05	0.000441468	yes
XLOC_014777	XLOC_014777	si:ch211 196n4.9	chr19:24206530 24210245	wt	ele	OK	0.361397	1.73597	2.26409	3.39681	5e-05	0.000441468	yes
XLOC_020055	XLOC_020055	ENSDARG00000088912	chr22:23510909 23520646	wt	ele	OK	0.373733	1.79144	2.26104	1.8121	0.0022	0.0114559	yes
XLOC_025635	XLOC_025635	cyp3c1l2	chr3:40942742 40950564	wt	ele	OK	0.201929	0.964767	2.25634	2.77605	0.0004	0.00274441	yes
XLOC_001729	XLOC_001729	wu:fc75a09	chr1:53249322 53256921	wt	ele	OK	1.14896	5.48054	2.25399	6.33618	5e-05	0.000441468	yes
XLOC_021147	XLOC_021147	si:dkey 192i18.3	chr23:19212808 19217237	wt	ele	OK	0.602566	2.86295	2.24831	3.35518	5e-05	0.000441468	yes
XLOC_010445	XLOC_010445	ctssb.1	chr16:31769423 31773725	wt	ele	OK	3.90419	18.5391	2.24747	6.00412	5e-05	0.000441468	yes
XLOC_000837	XLOC_000837		Zv9_scaffold3470:117738 119707	wt	ele	OK	0.308679	1.46006	2.24185	3.2465	5e-05	0.000441468	yes
XLOC_011486	XLOC_011486		chr16:34870078 34872943	wt	ele	OK	0.343147	1.62308	2.24184	3.84578	5e-05	0.000441468	yes
XLOC_027463	XLOC_027463	si:ch211 244b2.3	chr4:25169680 25183010	wt	ele	OK	0.168208	0.789578	2.23083	2.2235	0.00165	0.00902625	yes
XLOC_034512	XLOC_034512	si:ch211 215p11.3	chr8:40651724 40669253	wt	ele	OK	0.326619	1.53171	2.22946	4.05932	5e-05	0.000441468	yes
XLOC_026469	XLOC_026469	si:ch211 209j12.1	chr4:33761625 33789292	wt	ele	OK	1.40577	6.59241	2.22944	4.51497	5e-05	0.000441468	yes
XLOC_011034	XLOC_011034	bcl3	chr16:27940652 27978617	wt	ele	OK	0.263722	1.23524	2.2277	2.96011	5e-05	0.000441468	yes
XLOC_018920	XLOC_018920	irf1b	chr21:44267642 44273778	wt	ele	OK	0.689087	3.21268	2.22102	3.81476	5e-05	0.000441468	yes
XLOC_020233	XLOC_020233	traf5	chr22:41260534 41281963	wt	ele	OK	0.313805	1.45708	2.21514	2.3178	0.0002	0.00151135	yes
XLOC_001908	XLOC_001908		chr1:60120959 60122589	wt	ele	OK	4.93215	22.8618	2.21265	6.98794	5e-05	0.000441468	yes
XLOC_001040	XLOC_001040		Zv9_scaffold3535:195641 248200	wt	ele	OK	0.241448	1.11516	2.20746	3.13401	5e-05	0.000441468	yes
XLOC_033791	XLOC_033791		chr7:76478022 76487314	wt	ele	OK	0.412182	1.90265	2.20666	2.79065	0.00035	0.00245539	yes
XLOC_000920	XLOC_000920		Zv9_scaffold3491:3 4216	wt	ele	OK	0.374697	1.72746	2.20486	4.27572	5e-05	0.000441468	yes
XLOC_008766	XLOC_008766		chr14:20987184 20988589	wt	ele	OK	0.751726	3.45693	2.20121	3.96432	5e-05	0.000441468	yes
XLOC_007625	XLOC_007625		chr13:52260773 52266638	wt	ele	OK	0.601156	2.75779	2.1977	5.74854	5e-05	0.000441468	yes
XLOC_026491	XLOC_026491	si:dkey 16p19.3	chr4:34820112 34829124	wt	ele	OK	0.560405	2.5359	2.17795	2.38308	0.00145	0.00810809	yes
XLOC_016503	XLOC_016503	oc90	chr2:43043669 43061471	wt	ele	OK	1.76152	7.88736	2.16272	4.16741	5e-05	0.000441468	yes
XLOC_023821	XLOC_023821	cpa2 cpa4	chr25:16939078 16958160	wt	ele	OK	0.780263	3.48944	2.16096	3.38088	5e-05	0.000441468	yes
XLOC_016777	XLOC_016777		chr2:27694881 27697301	wt	ele	OK	0.270125	1.20752	2.16035	3.19715	5e-05	0.000441468	yes
XLOC_013274	XLOC_013274	cngb1a	chr18:43916998 43933739	wt	ele	OK	0.191317	0.85248	2.1557	2.17393	0.0013	0.00738609	yes
XLOC_008318	XLOC_008318	si:dkey 92i17.2	chr14:10806071 10816622	wt	ele	OK	3.5674	15.8869	2.15489	5.9039	5e-05	0.000441468	yes
XLOC_000875	XLOC_000875		Zv9_scaffold3484:109665 111217	wt	ele	OK	0.236576	1.05255	2.15351	2.56281	0.0019	0.0101433	yes
XLOC_021332	XLOC_021332	GTSF1L	chr23:32339780 32346187	wt	ele	OK	6.69279	29.7504	2.15223	6.43132	5e-05	0.000441468	yes
XLOC_020408	XLOC_020408		chr22:7665585 7689712	wt	ele	OK	0.959695	4.25665	2.14907	3.34273	5e-05	0.000441468	yes
XLOC_032119	XLOC_032119		chr6:56245016 56248854	wt	ele	OK	0.311204	1.38027	2.14901	3.89711	5e-05	0.000441468	yes
XLOC_018934	XLOC_018934	CABZ01072037.1	chr21:120583 124634	wt	ele	OK	0.677728	3.00363	2.14793	3.47136	5e-05	0.000441468	yes
XLOC_006309	XLOC_006309		chr12:17562817 17563820	wt	ele	OK	0.769461	3.39631	2.14205	3.50172	0.00015	0.00117124	yes
XLOC_011189	XLOC_011189	CABZ01053617.1	chr16:39970096 39977567	wt	ele	OK	0.352656	1.552	2.13779	2.40265	5e-05	0.000441468	yes
XLOC_009710	XLOC_009710		chr15:31807171 31812030	wt	ele	OK	0.437202	1.92387	2.13764	2.89439	0.00115	0.00665512	yes
XLOC_016778	XLOC_016778		chr2:27697439 27699192	wt	ele	OK	0.230264	1.00365	2.1239	2.4856	0.0019	0.0101433	yes
XLOC_009838	XLOC_009838	lrtomt	chr15:42956372 42965953	wt	ele	OK	0.460752	2.00122	2.11882	3.02936	0.00105	0.00617442	yes
XLOC_020964	XLOC_020964	irf10	chr23:658180 669549	wt	ele	OK	0.319599	1.37985	2.11017	2.19667	0.00065	0.00413522	yes
XLOC_030059	XLOC_030059	prkg2	chr5:41284328 41308300	wt	ele	OK	0.473843	2.04086	2.1067	4.16776	5e-05	0.000441468	yes
XLOC_020377	XLOC_020377	zgc:113298	chr22:6262609 6290925	wt	ele	OK	0.788102	3.37104	2.09674	3.49906	5e-05	0.000441468	yes
XLOC_033141	XLOC_033141		chr7:8679987 8690282	wt	ele	OK	0.918391	3.87957	2.07872	2.74033	5e-05	0.000441468	yes
XLOC_006999	XLOC_006999	dnph1	chr13:3872912 3878539	wt	ele	OK	4.54421	19.1555	2.07565	4.32819	5e-05	0.000441468	yes
XLOC_010658	XLOC_010658	notchl	chr16:51979221 52012501	wt	ele	OK	0.527259	2.22173	2.0751	2.88011	0.00015	0.00117124	yes
XLOC_022579	XLOC_022579	scospondin	chr24:41589847 41751706	wt	ele	OK	0.34472	1.44741	2.06997	3.72846	5e-05	0.000441468	yes
XLOC_020912	XLOC_020912		chr22:25791293 25798889	wt	ele	OK	0.183193	0.765292	2.06265	3.83665	5e-05	0.000441468	yes
XLOC_006285	XLOC_006285		chr12:9277881 9279152	wt	ele	OK	0.574894	2.4006	2.06203	3.30297	0.0001	0.000822847	yes
XLOC_023246	XLOC_023246	ENSDARG00000089390	chr25:5132497 5143203	wt	ele	OK	0.820923	3.42208	2.05955	5.14284	5e-05	0.000441468	yes
XLOC_025839	XLOC_025839		chr3:4108861 4112656	wt	ele	OK	0.254507	1.04901	2.04326	3.25601	0.0001	0.000822847	yes
XLOC_022048	XLOC_022048	tgm1l4	chr23:46354747 46366940	wt	ele	OK	1.57476	6.46292	2.03706	4.91986	5e-05	0.000441468	yes
XLOC_024541	XLOC_024541	prr15la	chr3:24462121 24488530	wt	ele	OK	1.70014	6.94949	2.03125	3.50559	5e-05	0.000441468	yes
XLOC_016345	XLOC_016345	si:ch211 106h4.5	chr2:31326755 31330113	wt	ele	OK	0.682078	2.78559	2.02998	1.49956	0.0004	0.00274441	yes
XLOC_002978	XLOC_002978	si:ch211 159e21.1	chr10:18270935 18282303	wt	ele	OK	0.917871	3.74638	2.02913	2.14345	0.00115	0.00665512	yes
XLOC_015239	XLOC_015239	MCOLN3	chr2:1760765 1788872	wt	ele	OK	1.21686	4.94728	2.02347	4.37754	5e-05	0.000441468	yes
XLOC_028591	XLOC_028591		chr4:41270559 41275950	wt	ele	OK	0.482414	1.9611	2.02332	4.74249	5e-05	0.000441468	yes
XLOC_019149	XLOC_019149	si:ch211 22d5.2	chr21:19545149 19567053	wt	ele	OK	8.41789	34.2037	2.02262	6.96335	5e-05	0.000441468	yes
XLOC_027464	XLOC_027464	si:ch211 244b2.4	chr4:25183271 25208049	wt	ele	OK	0.65149	2.64127	2.01941	3.46355	5e-05	0.000441468	yes
XLOC_034966	XLOC_034966	si:ch211 196c10.6	chr8:23988624 23990240	wt	ele	OK	3.62149	14.525	2.00388	5.09143	5e-05	0.000441468	yes
XLOC_010720	XLOC_010720	ENSDARG00000088726	chr16:58012841 58025985	wt	ele	OK	5.02927	20.1109	1.99955	3.62507	5e-05	0.000441468	yes
XLOC_030629	XLOC_030629		chr5:14777815 14779428	wt	ele	OK	0.278884	1.11165	1.99497	2.54778	0.0021	0.0110272	yes
XLOC_026451	XLOC_026451	si:dkey 16p6.1	chr4:32235264 32271948	wt	ele	OK	0.675859	2.68693	1.99116	2.38984	0.00095	0.00567796	yes
XLOC_028987	XLOC_028987	bco2l	chr5:27765941 27775076	wt	ele	OK	0.229891	0.909341	1.98387	2.61323	0.00095	0.00567796	yes
XLOC_008037	XLOC_008037		chr14:33670710 33671914	wt	ele	OK	0.918469	3.62228	1.97959	3.3359	5e-05	0.000441468	yes
XLOC_024269	XLOC_024269	CR589947.1	chr3:4070351 4087936	wt	ele	OK	0.489756	1.92622	1.97563	2.93029	5e-05	0.000441468	yes
XLOC_011388	XLOC_011388	CABZ01080435.1	chr16:58124671 58140053	wt	ele	OK	4.60409	18.0874	1.974	5.5157	5e-05	0.000441468	yes
XLOC_032930	XLOC_032930	si:dkey 188k17.2	chr7:71416320 71419822	wt	ele	OK	0.396339	1.55627	1.97328	1.26372	0.00235	0.0120699	yes
XLOC_002575	XLOC_002575	si:dkey 156m2.3	chr1:58307307 58323929	wt	ele	OK	0.338097	1.31637	1.96105	4.32674	5e-05	0.000441468	yes
XLOC_001042	XLOC_001042		Zv9_scaffold3535:172615 176095	wt	ele	OK	0.3437	1.33637	1.9591	3.47077	5e-05	0.000441468	yes
XLOC_025310	XLOC_025310	tcap	chr3:21453654 21455521	wt	ele	OK	1.3444	5.22521	1.95853	4.00989	5e-05	0.000441468	yes
XLOC_027355	XLOC_027355		chr4:15362746 15378319	wt	ele	OK	0.371169	1.44045	1.95638	2.79649	5e-05	0.000441468	yes
XLOC_005994	XLOC_005994	hbbe3	chr12:21691905 21693036	wt	ele	OK	478.578	1857.11	1.95624	11.3473	5e-05	0.000441468	yes
XLOC_021642	XLOC_021642	sla2	chr23:14920210 14942617	wt	ele	OK	0.251423	0.973283	1.95274	1.57176	0.0022	0.0114559	yes
XLOC_022083	XLOC_022083		chr23:7535943 7537649	wt	ele	OK	0.334882	1.28941	1.94499	2.66939	0.00115	0.00665512	yes
XLOC_029928	XLOC_029928	bco2a	chr5:31693426 31719321	wt	ele	OK	0.967289	3.7224	1.94421	3.2754	5e-05	0.000441468	yes
XLOC_032120	XLOC_032120		chr6:56249715 56250888	wt	ele	OK	0.511778	1.96586	1.94157	2.93601	0.0009	0.00542979	yes
XLOC_001477	XLOC_001477	si:dkey 148e3.2	chr1:31471408 31472087	wt	ele	OK	1.40758	5.39161	1.9375	3.76202	0.00025	0.00183251	yes
XLOC_010659	XLOC_010659	tap1	chr16:52012758 52042248	wt	ele	OK	0.489257	1.8708	1.93499	3.47024	5e-05	0.000441468	yes
XLOC_034092	XLOC_034092	CIT	chr8:3987037 4122402	wt	ele	OK	0.292372	1.11654	1.93316	3.59677	5e-05	0.000441468	yes
XLOC_020698	XLOC_020698		chr22:28694697 28708409	wt	ele	OK	0.962652	3.67409	1.9323	3.14725	5e-05	0.000441468	yes
XLOC_001877	XLOC_001877	si:dkey 222h21.4 si:dkey 222h21.5 si:dkey 222h21.6	chr1:58977302 59003323	wt	ele	OK	0.198191	0.75641	1.93227	2.51838	0.0001	0.000822847	yes
XLOC_020155	XLOC_020155	TRIM14	chr22:32681508 32690497	wt	ele	OK	7.1515	27.2678	1.93088	5.33227	5e-05	0.000441468	yes
XLOC_023006	XLOC_023006	CU929175.1	chr24:40162333 40166008	wt	ele	OK	0.920593	3.50568	1.92906	3.27048	0.00065	0.00413522	yes
XLOC_004055	XLOC_004055	U6	chr11:6104461 6108977	wt	ele	OK	0.436252	1.65064	1.91979	2.13222	0.0016	0.00880762	yes
XLOC_006674	XLOC_006674	gsto1	chr13:25604321 25612941	wt	ele	OK	0.843206	3.18988	1.91955	3.19995	5e-05	0.000441468	yes
XLOC_022606	XLOC_022606	CDH7	chr24:35185 43166	wt	ele	OK	0.277137	1.04013	1.90809	2.23378	0.00015	0.00117124	yes
XLOC_004836	XLOC_004836		chr11:30611474 30613912	wt	ele	OK	0.449203	1.68383	1.90631	2.85074	0.00055	0.00359953	yes
XLOC_017353	XLOC_017353	si:ch211 10j20.1 si:ch211 10j20.2 si:ch211 10j20.5 si:dkey 217m5.9	chr20:39419015 39522873	wt	ele	OK	0.232944	0.873082	1.90613	1.99936	0.00015	0.00117124	yes
XLOC_001039	XLOC_001039		Zv9_scaffold3535:176510 194529	wt	ele	OK	0.550044	2.05837	1.90388	2.66952	0.0019	0.0101433	yes
XLOC_016904	XLOC_016904		chr2:59480730 59484647	wt	ele	OK	0.680583	2.54518	1.90293	4.50957	5e-05	0.000441468	yes
XLOC_035468	XLOC_035468		chr8:41464651 41528361	wt	ele	OK	0.296636	1.10898	1.90247	2.49132	0.00055	0.00359953	yes
XLOC_035606	XLOC_035606	si:ch211 121j5.2	chr9:7257465 7264026	wt	ele	OK	0.842964	3.13955	1.89701	3.25397	0.0001	0.000822847	yes
XLOC_000088	XLOC_000088		Zv9_NA240:1797 28150	wt	ele	OK	0.762584	2.83685	1.89532	3.84245	5e-05	0.000441468	yes
XLOC_019837	XLOC_019837	si:ch211 213a13.11	chr22:8999940 9035490	wt	ele	OK	0.228015	0.846094	1.89169	2.72865	5e-05	0.000441468	yes
XLOC_011594	XLOC_011594	zgc:136872	chr17:2784828 2939580	wt	ele	OK	0.503169	1.86153	1.88737	2.33558	5e-05	0.000441468	yes
XLOC_001448	XLOC_001448	zic2b	chr1:28776998 28806135	wt	ele	OK	7.34121	27.0872	1.88352	7.01487	5e-05	0.000441468	yes
XLOC_025401	XLOC_025401	si:dkey 165i8.5	chr3:29774235 29777054	wt	ele	OK	0.854183	3.14284	1.87945	2.64016	0.00045	0.00304428	yes
XLOC_007664	XLOC_007664	fgf2	chr14:563297 565810	wt	ele	OK	12.2326	44.9115	1.87636	12.3221	0.002	0.0105913	yes
XLOC_017032	XLOC_017032	si:ch211 155o21.3	chr20:11912839 11917972	wt	ele	OK	2.1392	7.81279	1.86877	2.45205	5e-05	0.000441468	yes
XLOC_017372	XLOC_017372	TDRD15	chr20:42569198 42593471	wt	ele	OK	0.29667	1.08188	1.86661	1.18316	0.00085	0.00519023	yes
XLOC_015374	XLOC_015374	wdr65	chr2:13254293 13472513	wt	ele	OK	0.664008	2.42043	1.86599	2.20576	5e-05	0.000441468	yes
XLOC_017927	XLOC_017927	si:dkey 30j22.3	chr20:35585018 35588559	wt	ele	OK	0.376622	1.36907	1.862	2.28936	0.0003	0.00215436	yes
XLOC_004691	XLOC_004691	CU459095.1	chr11:14672369 14882992	wt	ele	OK	0.48954	1.77838	1.86106	2.55132	0.0001	0.000822847	yes
XLOC_013879	XLOC_013879		chr18:43116834 43118898	wt	ele	OK	0.570668	2.07155	1.85999	2.88563	0.0002	0.00151135	yes
XLOC_015003	XLOC_015003	si:ch211 199g17.2	chr19:44979719 45003866	wt	ele	OK	0.888439	3.22421	1.8596	2.43459	5e-05	0.000441468	yes
XLOC_027063	XLOC_027063	CABZ01083834.1	chr4:59645301 59717767	wt	ele	OK	0.559092	2.02874	1.85943	3.24417	5e-05	0.000441468	yes
XLOC_002376	XLOC_002376	zgc:111983	chr1:45628898 45632879	wt	ele	OK	3.65771	13.2237	1.85412	4.63092	5e-05	0.000441468	yes
XLOC_033386	XLOC_033386	stk33	chr7:29711230 29740214	wt	ele	OK	0.336874	1.21472	1.85034	1.60456	0.00045	0.00304428	yes
XLOC_016200	XLOC_016200	si:ch211 153l6.4	chr2:18957773 18983437	wt	ele	OK	1.08894	3.91492	1.84606	2.71902	0.0001	0.000822847	yes
XLOC_021661	XLOC_021661	dnmt3	chr23:17154080 17175808	wt	ele	OK	6.35849	22.8292	1.84413	6.71169	5e-05	0.000441468	yes
XLOC_003760	XLOC_003760	igsf5	chr10:40370377 40396337	wt	ele	OK	0.479976	1.72325	1.84409	1.94837	0.0017	0.00925703	yes
XLOC_004954	XLOC_004954	her2	chr11:43073538 43077202	wt	ele	OK	9.86626	35.3168	1.83978	6.88184	5e-05	0.000441468	yes
XLOC_034336	XLOC_034336	mmp9	chr8:25134454 25148890	wt	ele	OK	3.24092	11.5278	1.83064	5.8104	5e-05	0.000441468	yes
XLOC_009816	XLOC_009816	si:ch211 181d7.3	chr15:41270040 41288879	wt	ele	OK	0.583565	2.07324	1.82892	4.27356	5e-05	0.000441468	yes
XLOC_016610	XLOC_016610	crygn1	chr2:51587029 51613466	wt	ele	OK	2.19688	7.79806	1.82766	2.68975	0.0028	0.0139108	yes
XLOC_024626	XLOC_024626	mybpc2a	chr3:30400708 30468868	wt	ele	OK	0.246184	0.869022	1.81965	2.63356	0.00015	0.00117124	yes
XLOC_013790	XLOC_013790		chr18:258695 259474	wt	ele	OK	1.02016	3.59891	1.81876	3.16654	0.0006	0.0038638	yes
XLOC_027039	XLOC_027039	si:dkey 202n8.1	chr4:57967617 58011478	wt	ele	OK	0.511756	1.80068	1.81501	2.27768	0.0003	0.00215436	yes
XLOC_001807	XLOC_001807	c3c	chr1:56821383 56867340	wt	ele	OK	1.00852	3.54793	1.81474	5.26935	5e-05	0.000441468	yes
XLOC_034642	XLOC_034642	nkx3 1	chr8:52535761 52538280	wt	ele	OK	1.20744	4.24452	1.81365	2.33746	0.0002	0.00151135	yes
XLOC_006969	XLOC_006969	olig3	chr13:1177251 1180015	wt	ele	OK	4.71944	16.5491	1.81006	3.77648	5e-05	0.000441468	yes
XLOC_019956	XLOC_019956	frem1b	chr22:17339661 17413701	wt	ele	OK	2.78175	9.73618	1.80736	7.07732	5e-05	0.000441468	yes
XLOC_011522	XLOC_011522		chr16:52042389 52045192	wt	ele	OK	0.25945	0.901985	1.79765	2.70078	0.0003	0.00215436	yes
XLOC_016479	XLOC_016479	CR848728.2	chr2:41720883 41787554	wt	ele	OK	1.76102	6.11824	1.7967	4.76982	5e-05	0.000441468	yes
XLOC_034607	XLOC_034607	CR855877.1	chr8:49885905 49910849	wt	ele	OK	0.521028	1.80675	1.79396	3.78843	5e-05	0.000441468	yes
XLOC_033772	XLOC_033772	CU929396.1	chr7:75095754 75104612	wt	ele	OK	0.672119	2.32731	1.79187	3.36112	5e-05	0.000441468	yes
XLOC_022257	XLOC_022257	XRCC2	chr24:7437936 7443561	wt	ele	OK	0.770296	2.65443	1.78492	2.92912	0.0009	0.00542979	yes
XLOC_014795	XLOC_014795		chr19:24772986 24802637	wt	ele	OK	0.599225	2.06492	1.78491	2.0986	0.0029	0.0143056	yes
XLOC_011720	XLOC_011720	efcab11	chr17:16264959 16374308	wt	ele	OK	1.59737	5.49003	1.78112	3.473	5e-05	0.000441468	yes
XLOC_012430	XLOC_012430		chr17:29183656 29195207	wt	ele	OK	0.517872	1.77871	1.78016	3.18979	5e-05	0.000441468	yes
XLOC_012010	XLOC_012010	KCNK3	chr17:45622458 45626723	wt	ele	OK	0.361508	1.24081	1.77919	2.55481	0.00145	0.00810809	yes
XLOC_032028	XLOC_032028		chr6:16867535 16870197	wt	ele	OK	0.997947	3.42292	1.77819	3.47265	5e-05	0.000441468	yes
XLOC_024158	XLOC_024158		chr25:28552137 28553534	wt	ele	OK	0.376888	1.29057	1.77581	2.42955	0.00235	0.0120699	yes
XLOC_007654	XLOC_007654		chr14:181465 182278	wt	ele	OK	4.95041	16.9347	1.77437	5.31227	5e-05	0.000441468	yes
XLOC_030946	XLOC_030946	iqca1	chr6:15662217 15811221	wt	ele	OK	0.885256	3.02642	1.77344	3.35233	5e-05	0.000441468	yes
XLOC_003838	XLOC_003838		chr10:44087987 44097301	wt	ele	OK	0.374481	1.27874	1.77175	4.19471	5e-05	0.000441468	yes
XLOC_024222	XLOC_024222	zgc:172051	chr3:1777474 1800208	wt	ele	OK	0.934853	3.18785	1.76977	2.44853	0.00055	0.00359953	yes
XLOC_036284	XLOC_036284	si:ch211 277p15.1	chr9:19906828 19914502	wt	ele	OK	3.08397	10.451	1.76078	1.97049	0.00125	0.00714484	yes
XLOC_007073	XLOC_007073	si:ch211 219o4.2	chr13:9640530 9684131	wt	ele	OK	0.733728	2.48601	1.76052	2.81147	5e-05	0.000441468	yes
XLOC_009335	XLOC_009335	ALOX5	chr15:576473 645426	wt	ele	OK	1.8424	6.21428	1.754	2.98539	5e-05	0.000441468	yes
XLOC_002392	XLOC_002392	ebpl	chr1:47156554 47161104	wt	ele	OK	1.15666	3.89698	1.75239	2.75935	5e-05	0.000441468	yes
XLOC_021135	XLOC_021135	chia.4 chia.6	chr23:18096996 18164381	wt	ele	OK	0.929068	3.12797	1.75137	2.16013	5e-05	0.000441468	yes
XLOC_026604	XLOC_026604	CR388013.3	chr4:41435005 41443723	wt	ele	OK	0.540394	1.81818	1.75041	2.5697	0.00275	0.0137026	yes
XLOC_026887	XLOC_026887	si:dkey 51d8.8 si:dkey 51d8.9	chr4:50884303 50893158	wt	ele	OK	1.0783	3.62545	1.7494	1.93083	0.00145	0.00810809	yes
XLOC_026950	XLOC_026950	si:dkey 193i10.3	chr4:51685592 51686985	wt	ele	OK	1.10029	3.69931	1.74938	3.23316	0.00015	0.00117124	yes
XLOC_009580	XLOC_009580	ccdc153	chr15:22551436 22560143	wt	ele	OK	1.37926	4.63599	1.74898	2.41441	5e-05	0.000441468	yes
XLOC_016633	XLOC_016633	HSD11B1L	chr2:54045003 54068848	wt	ele	OK	0.570363	1.91575	1.74796	2.33956	0.0006	0.0038638	yes
XLOC_034249	XLOC_034249	DMBX1	chr8:21026339 21029797	wt	ele	OK	3.45349	11.5943	1.74729	5.64837	5e-05	0.000441468	yes
XLOC_013182	XLOC_013182	CR626874.1	chr18:33103155 33279096	wt	ele	OK	0.439025	1.4708	1.74422	2.38503	0.0006	0.0038638	yes
XLOC_026967	XLOC_026967	si:dkey 156k2.6	chr4:53335937 53347179	wt	ele	OK	0.51117	1.71132	1.74324	2.71261	0.00015	0.00117124	yes
XLOC_002145	XLOC_002145	chrnb2a	chr1:21320443 21368213	wt	ele	OK	0.302758	1.01285	1.74219	1.77301	0.0023	0.0118645	yes
XLOC_003452	XLOC_003452	mir219 1	chr10:10278919 10298323	wt	ele	OK	2.16915	7.25217	1.74128	2.1516	0.0001	0.000822847	yes
XLOC_000235	XLOC_000235		Zv9_NA437:26588 33271	wt	ele	OK	1.6377	5.47158	1.74029	3.0249	0.0003	0.00215436	yes
XLOC_012477	XLOC_012477	ECT2L	chr17:33595377 33613804	wt	ele	OK	0.916799	3.0556	1.73678	3.84008	5e-05	0.000441468	yes
XLOC_026588	XLOC_026588	CR356223.3	chr4:40665439 40668194	wt	ele	OK	2.79897	9.32466	1.73615	4.06265	5e-05	0.000441468	yes
XLOC_004278	XLOC_004278	opn1sw2	chr11:26406316 26408962	wt	ele	OK	0.392461	1.30729	1.73595	2.42047	0.0026	0.0131123	yes
XLOC_021108	XLOC_021108	zgc:153722	chr23:16945306 16958948	wt	ele	OK	0.903167	3.00346	1.73356	3.28998	5e-05	0.000441468	yes
XLOC_008515	XLOC_008515		chr14:32938964 32959262	wt	ele	OK	1.25144	4.15266	1.73045	6.22465	5e-05	0.000441468	yes
XLOC_008189	XLOC_008189	atoh1b	chr14:51971417 51973818	wt	ele	OK	4.86608	16.1288	1.7288	4.15364	5e-05	0.000441468	yes
XLOC_000779	XLOC_000779		Zv9_scaffold3459:247657 250210	wt	ele	OK	0.393429	1.2995	1.72378	2.89216	0.00025	0.00183251	yes
XLOC_026678	XLOC_026678	si:dkey 72l17.6	chr4:45853745 45939686	wt	ele	OK	0.572405	1.88973	1.72307	2.33983	0.00105	0.00617442	yes
XLOC_015970	XLOC_015970	si:ch211 150h8.3	chr2:59999596 60016580	wt	ele	OK	0.560915	1.84871	1.72067	2.47117	0.00245	0.0124941	yes
XLOC_006473	XLOC_006473	tuba4l	chr13:6285076 6290337	wt	ele	OK	0.757504	2.49264	1.71835	3.11823	0.00015	0.00117124	yes
XLOC_004775	XLOC_004775	optc	chr11:24136957 24153781	wt	ele	OK	2.90518	9.52723	1.71343	4.14728	5e-05	0.000441468	yes
XLOC_018383	XLOC_018383	fech	chr21:1970693 1997082	wt	ele	OK	1.40958	4.6175	1.71185	3.32657	5e-05	0.000441468	yes
XLOC_019861	XLOC_019861	blf	chr22:10027156 10033842	wt	ele	OK	2.47341	8.07922	1.70772	4.53265	5e-05	0.000441468	yes
XLOC_016524	XLOC_016524	mpz	chr2:44320982 44344572	wt	ele	OK	0.871782	2.82997	1.69875	2.29279	5e-05	0.000441468	yes
XLOC_001397	XLOC_001397	mnd1	chr1:24035505 24073635	wt	ele	OK	11.6361	37.7601	1.69825	5.76871	5e-05	0.000441468	yes
XLOC_034421	XLOC_034421	upb1	chr8:31547470 31590275	wt	ele	OK	5.51474	17.8929	1.69802	3.12471	5e-05	0.000441468	yes
XLOC_003209	XLOC_003209	ucp3	chr10:37894302 37900774	wt	ele	OK	0.657837	2.13197	1.69639	2.49343	0.0002	0.00151135	yes
XLOC_022324	XLOC_022324	fbxo15	chr24:15558550 15573343	wt	ele	OK	0.366665	1.18724	1.69508	2.2152	0.00105	0.00617442	yes
XLOC_027006	XLOC_027006	ZNF337	chr4:56191530 56215312	wt	ele	OK	0.424888	1.3757	1.69501	2.69724	0.00025	0.00183251	yes
XLOC_030680	XLOC_030680		chr5:44148641 44157495	wt	ele	OK	0.637616	2.06414	1.69478	4.83547	5e-05	0.000441468	yes
XLOC_017562	XLOC_017562	gabrr2b	chr20:1181445 1197575	wt	ele	OK	0.661421	2.13136	1.68813	2.70805	0.0001	0.000822847	yes
XLOC_001451	XLOC_001451	si:ch73 115f13.1	chr1:29062084 29066924	wt	ele	OK	4.19143	13.4845	1.68579	3.94467	5e-05	0.000441468	yes
XLOC_023656	XLOC_023656	CU183952.1	chr25:1406534 1408840	wt	ele	OK	0.369501	1.18827	1.68521	2.12048	0.00045	0.00304428	yes
XLOC_033528	XLOC_033528		chr7:42269266 42278461	wt	ele	OK	0.933716	2.99867	1.68327	5.16845	5e-05	0.000441468	yes
XLOC_013312	XLOC_013312	si:ch211 136a13.2	chr18:48045293 48066302	wt	ele	OK	1.49939	4.80702	1.68077	3.01544	5e-05	0.000441468	yes
XLOC_021990	XLOC_021990	cyp2aa11 cyp2aa7	chr23:42957987 42980371	wt	ele	OK	5.78828	18.5327	1.67886	5.31396	5e-05	0.000441468	yes
XLOC_014420	XLOC_014420		chr19:48406345 48408029	wt	ele	OK	1.5981	5.10613	1.67587	3.72671	5e-05	0.000441468	yes
XLOC_031519	XLOC_031519	gulp1b	chr6:11407044 11525302	wt	ele	OK	1.21782	3.87797	1.671	3.24665	5e-05	0.000441468	yes
XLOC_010923	XLOC_010923	5S_rRNA iffo1b si:dkey 260g12.1	chr16:19163803 19224742	wt	ele	OK	4.66297	14.8082	1.66707	5.54661	5e-05	0.000441468	yes
XLOC_020362	XLOC_020362	si:rp71 36a1.2	chr22:5845329 5863778	wt	ele	OK	1.27136	4.02912	1.6641	3.42327	5e-05	0.000441468	yes
XLOC_036182	XLOC_036182	si:dkeyp 118h3.7	chr9:6557733 6589855	wt	ele	OK	1.25875	3.98876	1.66395	2.7582	5e-05	0.000441468	yes
XLOC_030502	XLOC_030502	mat2ab	chr5:72057069 72072448	wt	ele	OK	8.25552	26.1493	1.66334	4.74943	5e-05	0.000441468	yes
XLOC_033880	XLOC_033880		chr7:16938222 16941883	wt	ele	OK	0.371946	1.17802	1.66319	3.01293	0.0001	0.000822847	yes
XLOC_019550	XLOC_019550		chr21:32531948 32532507	wt	ele	OK	3.91482	12.3675	1.65953	4.22334	5e-05	0.000441468	yes
XLOC_028445	XLOC_028445	wu:fd58b11	chr4:61874256 61880701	wt	ele	OK	0.770404	2.43121	1.65799	2.09858	0.00205	0.0108054	yes
XLOC_023566	XLOC_023566		chr25:35083494 35094450	wt	ele	OK	0.778775	2.45624	1.65717	3.00422	5e-05	0.000441468	yes
XLOC_007657	XLOC_007657	hs3st1	chr14:242033 246627	wt	ele	OK	0.698763	2.20309	1.65666	2.56951	5e-05	0.000441468	yes
XLOC_013688	XLOC_013688	si:ch211 132b12.7	chr18:38965705 38981883	wt	ele	OK	0.348285	1.09673	1.65487	2.32447	0.0011	0.00641906	yes
XLOC_033319	XLOC_033319		chr7:24135541 24148729	wt	ele	OK	0.986588	3.10176	1.65257	3.87575	5e-05	0.000441468	yes
XLOC_028705	XLOC_028705		chr4:59770839 59772485	wt	ele	OK	0.392324	1.23238	1.65133	2.34239	0.0017	0.00925703	yes
XLOC_028275	XLOC_028275	zgc:174704	chr4:53493979 53618392	wt	ele	OK	0.719752	2.25501	1.64756	2.38158	0.0017	0.00925703	yes
XLOC_028168	XLOC_028168	si:ch211 283l16.1	chr4:48477842 48483909	wt	ele	OK	0.269449	0.843817	1.64692	1.76937	0.0022	0.0114559	yes
XLOC_028280	XLOC_028280	zgc:174642	chr4:53909610 53916379	wt	ele	OK	0.549741	1.72013	1.6457	2.34682	0.0001	0.000822847	yes
XLOC_005168	XLOC_005168	dnah9	chr12:227104 250246	wt	ele	OK	0.548591	1.71044	1.64057	2.44468	5e-05	0.000441468	yes
XLOC_016871	XLOC_016871		chr2:56638829 56641281	wt	ele	OK	0.538487	1.67826	1.63999	3.0376	5e-05	0.000441468	yes
XLOC_015773	XLOC_015773	pask	chr2:44573848 44607369	wt	ele	OK	2.51292	7.83122	1.63987	5.54435	5e-05	0.000441468	yes
XLOC_003167	XLOC_003167	rxfp2b	chr10:34772379 34895815	wt	ele	OK	0.232344	0.72407	1.63987	2.01183	0.00075	0.00467724	yes
XLOC_000107	XLOC_000107		Zv9_NA27:12969 42527	wt	ele	OK	0.452818	1.40825	1.6369	2.70105	0.0005	0.0033237	yes
XLOC_004753	XLOC_004753	slc4a5	chr11:21372645 21460551	wt	ele	OK	0.262915	0.817557	1.63672	2.33901	0.0001	0.000822847	yes
XLOC_023567	XLOC_023567		chr25:35094727 35097292	wt	ele	OK	1.36709	4.24908	1.63604	2.96863	0.002	0.0105913	yes
XLOC_020258	XLOC_020258	CABZ01094378.1	chr22:77 4766	wt	ele	OK	3.81834	11.8272	1.63109	4.71421	5e-05	0.000441468	yes
XLOC_007660	XLOC_007660		chr14:317380 319037	wt	ele	OK	5.56388	17.2307	1.63081	5.12636	5e-05	0.000441468	yes
XLOC_007238	XLOC_007238	wnt8b	chr13:30214652 30230644	wt	ele	OK	0.906469	2.802	1.62813	3.90716	5e-05	0.000441468	yes
XLOC_013400	XLOC_013400	ppp6r2b	chr18:5894599 5942176	wt	ele	OK	6.51259	20.127	1.62783	3.68113	5e-05	0.000441468	yes
XLOC_011923	XLOC_011923	SNAP23	chr17:33639323 33646778	wt	ele	OK	4.02245	12.4081	1.62514	3.62314	5e-05	0.000441468	yes
XLOC_015195	XLOC_015195		chr19:47706745 47708431	wt	ele	OK	1.81475	5.59487	1.62433	4.14031	5e-05	0.000441468	yes
XLOC_034394	XLOC_034394	fam212b	chr8:29096168 29120475	wt	ele	OK	2.99773	9.2325	1.62285	2.57732	0.0001	0.000822847	yes
XLOC_010294	XLOC_010294	si:ch211 254p10.2	chr16:20964219 20978845	wt	ele	OK	0.311923	0.958601	1.61974	1.95492	0.00045	0.00304428	yes
XLOC_020409	XLOC_020409	si:ch211 59h6.1	chr22:7714161 8044288	wt	ele	OK	1.42021	4.36335	1.61933	1.90616	0.00025	0.00183251	yes
XLOC_007323	XLOC_007323	zgc:153911	chr13:36375960 36378585	wt	ele	OK	0.44102	1.34995	1.61399	2.46213	0.00095	0.00567796	yes
XLOC_010317	XLOC_010317	skap2	chr16:23016318 23062746	wt	ele	OK	2.00361	6.12754	1.61271	3.49402	5e-05	0.000441468	yes
XLOC_018322	XLOC_018322		chr20:51523786 51532374	wt	ele	OK	0.353254	1.07795	1.60951	3.84535	5e-05	0.000441468	yes
XLOC_032604	XLOC_032604	wdr76	chr7:31538154 31568430	wt	ele	OK	3.29888	10.0638	1.60912	2.58326	0.0008	0.00494223	yes
XLOC_024298	XLOC_024298	TRIM35	chr3:5968925 5981171	wt	ele	OK	0.95485	2.91232	1.60882	3.1032	5e-05	0.000441468	yes
XLOC_016988	XLOC_016988	CYP46A1 cyp46a1	chr20:5148222 5185993	wt	ele	OK	1.29806	3.95902	1.60879	3.51851	5e-05	0.000441468	yes
XLOC_028964	XLOC_028964	tp53	chr5:25755161 25766740	wt	ele	OK	51.4856	156.883	1.60745	6.29776	5e-05	0.000441468	yes
XLOC_031637	XLOC_031637	BX936371.1	chr6:23267188 23269528	wt	ele	OK	2.15207	6.55594	1.60708	4.70902	5e-05	0.000441468	yes
XLOC_013694	XLOC_013694	pglyrp5	chr18:39199726 39202992	wt	ele	OK	0.555468	1.69055	1.60571	2.44607	0.00215	0.0112474	yes
XLOC_015888	XLOC_015888	ghrhra	chr2:52451853 52515481	wt	ele	OK	0.328575	0.997684	1.60236	2.05738	0.0024	0.0122682	yes
XLOC_024004	XLOC_024004	rps27.2	chr25:34827001 34835684	wt	ele	OK	53.7368	163.01	1.60098	5.84189	5e-05	0.000441468	yes
XLOC_011112	XLOC_011112	si:dkey 97i18.5	chr16:33930174 33932357	wt	ele	OK	7.47289	22.6677	1.6009	4.82561	5e-05	0.000441468	yes
XLOC_026680	XLOC_026680	si:dkey 72l17.5	chr4:46072422 46121834	wt	ele	OK	0.741722	2.24454	1.59747	2.16635	0.0027	0.0135017	yes
XLOC_019834	XLOC_019834	si:ch211 213a13.1	chr22:8919184 8935574	wt	ele	OK	2.5739	7.78648	1.59702	4.71193	5e-05	0.000441468	yes
XLOC_027713	XLOC_027713	PEG3	chr4:34110819 34143176	wt	ele	OK	0.255515	0.772873	1.59683	2.20438	0.00265	0.0133022	yes
XLOC_036531	XLOC_036531	si:dkey 184d2.3	chr9:37797843 37799128	wt	ele	OK	64.5994	195.066	1.59437	8.6592	5e-05	0.000441468	yes
XLOC_025252	XLOC_025252	ENSDARG00000073998	chr3:16092599 16127547	wt	ele	OK	0.745137	2.248	1.59306	3.20815	5e-05	0.000441468	yes
XLOC_035176	XLOC_035176	BX927164.2	chr8:40413803 40517410	wt	ele	OK	0.825648	2.48972	1.59239	1.77342	0.00215	0.0112474	yes
XLOC_023551	XLOC_023551	duox	chr25:32936630 32997395	wt	ele	OK	0.380296	1.1458	1.59116	3.15152	5e-05	0.000441468	yes
XLOC_010919	XLOC_010919	CR848045.1 si:dkey 8k3.2	chr16:18718924 18756463	wt	ele	OK	2.95999	8.91052	1.58992	3.75559	5e-05	0.000441468	yes
XLOC_035976	XLOC_035976	si:dkey 95p16.2	chr9:41758654 41919526	wt	ele	OK	45.4962	136.866	1.58894	3.33984	0.0001	0.000822847	yes
XLOC_008066	XLOC_008066	pttg1	chr14:35688888 35691689	wt	ele	OK	2.69575	8.09821	1.58692	3.04491	5e-05	0.000441468	yes
XLOC_000453	XLOC_000453		Zv9_NA735:109128 118219	wt	ele	OK	8.63227	25.8262	1.58102	5.00388	5e-05	0.000441468	yes
XLOC_010599	XLOC_010599	mir92b	chr16:45736462 45737340	wt	ele	OK	2.23345	6.67608	1.57973	1.99032	0.0002	0.00151135	yes
XLOC_035801	XLOC_035801	CT030712.1	chr9:25734334 25744892	wt	ele	OK	2.52806	7.55416	1.57924	4.33429	5e-05	0.000441468	yes
XLOC_011496	XLOC_011496		chr16:37970159 37980500	wt	ele	OK	0.420233	1.25321	1.57637	4.20579	5e-05	0.000441468	yes
XLOC_019832	XLOC_019832	si:dkey 182g1.6	chr22:8799584 8833314	wt	ele	OK	0.864545	2.57367	1.57381	3.14493	5e-05	0.000441468	yes
XLOC_019181	XLOC_019181	GDPD4	chr21:21262734 21277115	wt	ele	OK	3.13503	9.30862	1.57009	4.35141	5e-05	0.000441468	yes
XLOC_007072	XLOC_007072		chr13:9624396 9636537	wt	ele	OK	0.362342	1.07577	1.56994	3.90009	5e-05	0.000441468	yes
XLOC_019835	XLOC_019835	rnh1	chr22:8942784 8946531	wt	ele	OK	0.671515	1.99368	1.56994	2.7687	0.00045	0.00304428	yes
XLOC_020918	XLOC_020918		chr22:28709727 28712088	wt	ele	OK	0.74832	2.22134	1.5697	3.19423	5e-05	0.000441468	yes
XLOC_030907	XLOC_030907	col5a2b	chr6:11349918 11406978	wt	ele	OK	1.49273	4.43017	1.56941	4.81215	5e-05	0.000441468	yes
XLOC_030921	XLOC_030921	casp8	chr6:12957804 12968646	wt	ele	OK	2.85648	8.46728	1.56766	4.83197	5e-05	0.000441468	yes
XLOC_025215	XLOC_025215	swsap1	chr3:14170453 14176207	wt	ele	OK	0.731688	2.16823	1.56721	2.63906	0.0006	0.0038638	yes
XLOC_013073	XLOC_013073	zgc:158868	chr18:21890089 21897089	wt	ele	OK	1.29886	3.84132	1.56435	2.50136	0.0002	0.00151135	yes
XLOC_012871	XLOC_012871	cyp1a	chr18:4974675 4985566	wt	ele	OK	17.7218	52.3587	1.56291	6.93202	5e-05	0.000441468	yes
XLOC_017249	XLOC_017249	si:ch211 279m15.1	chr20:31454726 31770383	wt	ele	OK	15.4808	45.6492	1.56011	3.34792	5e-05	0.000441468	yes
XLOC_035778	XLOC_035778	map3k19	chr9:24258099 24265365	wt	ele	OK	0.424186	1.25029	1.55949	1.66981	0.0026	0.0131123	yes
XLOC_024403	XLOC_024403		chr3:14062563 14066362	wt	ele	OK	0.321573	0.946792	1.5579	2.32527	0.00095	0.00567796	yes
XLOC_004800	XLOC_004800	gata1a	chr11:26344429 26352415	wt	ele	OK	1.28892	3.79226	1.5569	2.91924	5e-05	0.000441468	yes
XLOC_033292	XLOC_033292	CU019646.2	chr7:21397518 21398924	wt	ele	OK	1.05079	3.08772	1.55507	2.89337	0.00015	0.00117124	yes
XLOC_034232	XLOC_034232	MPEG1	chr8:19881016 19884779	wt	ele	OK	0.853604	2.50683	1.55423	3.45078	5e-05	0.000441468	yes
XLOC_000778	XLOC_000778		Zv9_scaffold3459:244568 246459	wt	ele	OK	0.30513	0.895927	1.55396	2.10571	0.0029	0.0143056	yes
XLOC_005006	XLOC_005006	CABZ01112732.1	chr11:46330375 46336046	wt	ele	OK	0.469456	1.36828	1.5433	2.63986	5e-05	0.000441468	yes
XLOC_032912	XLOC_032912	gcshb	chr7:69505086 69517069	wt	ele	OK	7.26488	21.1724	1.54317	4.56434	5e-05	0.000441468	yes
XLOC_032308	XLOC_032308		chr7:8679987 8690282	wt	ele	OK	7.77771	22.6409	1.54151	5.68026	5e-05	0.000441468	yes
XLOC_022460	XLOC_022460	BX927314.1	chr24:30522347 30524684	wt	ele	OK	1.19142	3.4673	1.54113	3.61812	5e-05	0.000441468	yes
XLOC_004366	XLOC_004366	CU928222.1	chr11:37318301 37330604	wt	ele	OK	5.84917	17.0139	1.54041	4.89758	5e-05	0.000441468	yes
XLOC_011988	XLOC_011988	zgc:66313	chr17:43910264 43933718	wt	ele	OK	1.87914	5.461	1.53909	2.62229	5e-05	0.000441468	yes
XLOC_024754	XLOC_024754	C3H17orf53	chr3:37785132 37801065	wt	ele	OK	1.11735	3.24638	1.53875	3.56647	5e-05	0.000441468	yes
XLOC_004641	XLOC_004641	cdc6	chr11:11904846 11914072	wt	ele	OK	11.9614	34.745	1.53842	6.61421	5e-05	0.000441468	yes
XLOC_026563	XLOC_026563	si:dkeyp 35e5.9	chr4:38880239 38887226	wt	ele	OK	0.56254	1.63203	1.53664	2.68465	0.00055	0.00359953	yes
XLOC_005421	XLOC_005421	arsg	chr12:21914106 21952866	wt	ele	OK	3.40066	9.85975	1.53574	2.3252	5e-05	0.000441468	yes
XLOC_014633	XLOC_014633	si:dkey 3n22.9	chr19:11415887 11463761	wt	ele	OK	1.16541	3.37321	1.53328	2.09445	0.0018	0.00970567	yes
XLOC_008485	XLOC_008485	fosl1a	chr14:31609131 31617315	wt	ele	OK	0.739687	2.14053	1.53298	2.71453	5e-05	0.000441468	yes
XLOC_013788	XLOC_013788		chr18:254974 258112	wt	ele	OK	0.728242	2.10707	1.53275	3.34492	5e-05	0.000441468	yes
XLOC_003554	XLOC_003554	ponzr2	chr10:22324040 22328152	wt	ele	OK	2.45295	7.03788	1.52062	2.02374	0.00095	0.00567796	yes
XLOC_013379	XLOC_013379	ENSDARG00000040013	chr18:4744509 4769473	wt	ele	OK	0.424846	1.21708	1.51841	2.43895	0.00015	0.00117124	yes
XLOC_017911	XLOC_017911	si:ch211 63o20.10	chr20:34671883 34675241	wt	ele	OK	1.52612	4.36875	1.51735	2.59816	0.0001	0.000822847	yes
XLOC_036320	XLOC_036320	irg1	chr9:22866972 22871390	wt	ele	OK	0.644926	1.84587	1.5171	2.13271	0.0012	0.00689731	yes
XLOC_020398	XLOC_020398	fgfr1bl	chr22:6907970 6915772	wt	ele	OK	1.67323	4.78644	1.51632	2.46204	5e-05	0.000441468	yes
XLOC_004745	XLOC_004745	ogfrl2	chr11:20511781 20518122	wt	ele	OK	0.49799	1.42437	1.51613	2.22181	0.0001	0.000822847	yes
XLOC_022879	XLOC_022879	si:dkey 25o1.2	chr24:28340350 28344025	wt	ele	OK	8.41653	24.063	1.51552	5.26496	5e-05	0.000441468	yes
XLOC_011804	XLOC_011804	slc16a12a	chr17:23408142 23433042	wt	ele	OK	0.736226	2.10449	1.51525	3.49654	5e-05	0.000441468	yes
XLOC_002665	XLOC_002665		chr1:12481905 12483807	wt	ele	OK	0.546914	1.56206	1.51406	2.6056	0.0005	0.0033237	yes
XLOC_031050	XLOC_031050	BX470083.4	chr6:24747146 24752211	wt	ele	OK	0.940579	2.68288	1.51216	3.10056	5e-05	0.000441468	yes
XLOC_033279	XLOC_033279	dock11	chr7:20390820 20543478	wt	ele	OK	6.36369	18.1363	1.51095	5.06112	5e-05	0.000441468	yes
XLOC_011475	XLOC_011475		chr16:28089051 28093463	wt	ele	OK	1.50093	4.26971	1.50828	4.24216	5e-05	0.000441468	yes
XLOC_005677	XLOC_005677	tbata	chr12:49159825 49181723	wt	ele	OK	1.46715	4.16715	1.50605	2.65365	5e-05	0.000441468	yes
XLOC_010979	XLOC_010979	si:dkey 71b5.9	chr16:24136194 24197706	wt	ele	OK	5.07701	14.4122	1.50524	3.46881	5e-05	0.000441468	yes
XLOC_006329	XLOC_006329		chr12:33278756 33281902	wt	ele	OK	0.934436	2.64344	1.50025	3.3825	5e-05	0.000441468	yes
XLOC_011560	XLOC_011560	CABZ01073071.2	chr17:29354 30546	wt	ele	OK	7.99521	22.5719	1.49732	5.46956	0.0001	0.000822847	yes
XLOC_013699	XLOC_013699	zbtb38	chr18:39538396 39552291	wt	ele	OK	0.290162	0.817402	1.49419	2.28237	0.00055	0.00359953	yes
XLOC_019508	XLOC_019508		chr21:8731944 8733231	wt	ele	OK	0.724614	2.03732	1.49139	2.52113	0.00085	0.00519023	yes
XLOC_026431	XLOC_026431	si:ch211 212k5.4	chr4:30506272 30513016	wt	ele	OK	0.504331	1.41771	1.49112	1.71331	0.00255	0.0129234	yes
XLOC_020418	XLOC_020418		chr22:8111050 8287661	wt	ele	OK	4.21942	11.8451	1.48917	2.93915	0.0004	0.00274441	yes
XLOC_031110	XLOC_031110		chr6:31738407 31751276	wt	ele	OK	2.21498	6.21439	1.48832	2.67164	5e-05	0.000441468	yes
XLOC_007234	XLOC_007234	cdhr1a	chr13:29704257 29729438	wt	ele	OK	0.360448	1.01081	1.48766	2.37235	0.0001	0.000822847	yes
XLOC_026541	XLOC_026541	si:dkey 238o14.8	chr4:37646710 37650410	wt	ele	OK	0.881661	2.47241	1.48762	2.68299	5e-05	0.000441468	yes
XLOC_002382	XLOC_002382	atf7ip	chr1:46040744 46087163	wt	ele	OK	59.2386	166.01	1.48666	4.9174	5e-05	0.000441468	yes
XLOC_028510	XLOC_028510		chr4:28028454 28035583	wt	ele	OK	0.3281	0.919244	1.48631	3.15995	5e-05	0.000441468	yes
XLOC_022630	XLOC_022630		chr24:3076739 3079916	wt	ele	OK	1.36498	3.82237	1.48559	3.24803	5e-05	0.000441468	yes
XLOC_034745	XLOC_034745	cdc45	chr8:4717093 4969264	wt	ele	OK	7.87967	22.06	1.48523	2.19104	0.0006	0.0038638	yes
XLOC_016032	XLOC_016032	wnt3a	chr2:3593637 3653039	wt	ele	OK	1.58971	4.44388	1.48305	3.2608	5e-05	0.000441468	yes
XLOC_011852	XLOC_011852		chr17:26385734 26396831	wt	ele	OK	0.623871	1.74217	1.48157	3.0906	5e-05	0.000441468	yes
XLOC_016151	XLOC_016151	si:dkey 228i19.32	chr2:13915344 14077366	wt	ele	OK	2.93967	8.18267	1.47692	2.3637	0.00115	0.00665512	yes
XLOC_021809	XLOC_021809	wnt10b	chr23:27880592 27888543	wt	ele	OK	1.97984	5.51038	1.47677	3.46347	5e-05	0.000441468	yes
XLOC_032121	XLOC_032121		chr6:56251326 56253859	wt	ele	OK	0.710806	1.97747	1.47613	2.99699	5e-05	0.000441468	yes
XLOC_005686	XLOC_005686	scd	chr12:49683900 49699500	wt	ele	OK	0.280798	0.780402	1.47468	1.8495	0.00265	0.0133022	yes
XLOC_029471	XLOC_029471	GLDC	chr5:69157958 69203134	wt	ele	OK	4.39082	12.1928	1.47346	4.73911	5e-05	0.000441468	yes
XLOC_026566	XLOC_026566	ZNF70	chr4:39096271 39123080	wt	ele	OK	4.03678	11.2037	1.4727	4.46498	5e-05	0.000441468	yes
XLOC_015795	XLOC_015795	si:ch211 66k16.28	chr2:45535180 45544824	wt	ele	OK	0.353985	0.981162	1.4708	2.67455	5e-05	0.000441468	yes
XLOC_032967	XLOC_032967	tyms	chr7:75222915 75229200	wt	ele	OK	28.5493	79.0999	1.47022	7.03628	5e-05	0.000441468	yes
XLOC_011629	XLOC_011629	CR925758.1	chr17:6431367 6475535	wt	ele	OK	0.80655	2.23193	1.46846	3.31715	5e-05	0.000441468	yes
XLOC_026103	XLOC_026103	CU571169.1	chr4:5671389 5708367	wt	ele	OK	3.77406	10.4363	1.46742	2.72509	0.00015	0.00117124	yes
XLOC_004873	XLOC_004873	dnah1	chr11:35478545 35534429	wt	ele	OK	0.339111	0.937215	1.46662	3.27343	5e-05	0.000441468	yes
XLOC_020168	XLOC_020168	BX537350.1	chr22:33693623 33726369	wt	ele	OK	1.18082	3.26154	1.46576	2.91485	5e-05	0.000441468	yes
XLOC_019151	XLOC_019151	c6	chr21:19598935 19760521	wt	ele	OK	5.82137	16.0517	1.46329	3.108	5e-05	0.000441468	yes
XLOC_014682	XLOC_014682	stmn1a	chr19:16640048 16642794	wt	ele	OK	124.007	341.56	1.46172	6.21878	5e-05	0.000441468	yes
XLOC_000780	XLOC_000780		Zv9_scaffold3459:258996 261608	wt	ele	OK	1.97627	5.43036	1.45827	4.22614	5e-05	0.000441468	yes
XLOC_019836	XLOC_019836	si:ch211 213a13.2	chr22:8947106 8997674	wt	ele	OK	0.27564	0.754792	1.45329	3.09053	5e-05	0.000441468	yes
XLOC_024536	XLOC_024536	hoxb1a	chr3:24060138 24062383	wt	ele	OK	1.50949	4.13212	1.45282	3.32199	5e-05	0.000441468	yes
XLOC_013753	XLOC_013753	kcnj1a.6	chr18:47054459 47056563	wt	ele	OK	0.86786	2.37526	1.45255	2.33611	0.0001	0.000822847	yes
XLOC_021109	XLOC_021109	zgc:114081	chr23:16977926 16982445	wt	ele	OK	2.0317	5.5598	1.45235	2.54641	0.0002	0.00151135	yes
XLOC_007215	XLOC_007215	ddx43	chr13:27556545 27577948	wt	ele	OK	4.59632	12.5575	1.45	4.66586	5e-05	0.000441468	yes
XLOC_026667	XLOC_026667	si:dkey 270b7.5	chr4:44994188 45003798	wt	ele	OK	1.63496	4.46574	1.44965	2.92965	0.0004	0.00274441	yes
XLOC_011950	XLOC_011950	slc25a21	chr17:38197844 38400539	wt	ele	OK	2.51115	6.85866	1.44958	3.86907	5e-05	0.000441468	yes
XLOC_011750	XLOC_011750	eno4	chr17:21120680 21198790	wt	ele	OK	0.972432	2.65524	1.44917	2.66271	0.00015	0.00117124	yes
XLOC_020441	XLOC_020441	si:dkey 286j17.4	chr22:9742982 9846200	wt	ele	OK	0.970753	2.64517	1.44619	3.94113	5e-05	0.000441468	yes
XLOC_007123	XLOC_007123	ikzf1	chr13:15911856 15948530	wt	ele	OK	0.848776	2.31226	1.44585	2.51841	5e-05	0.000441468	yes
XLOC_015467	XLOC_015467	ca8	chr2:21651558 21675050	wt	ele	OK	3.05723	8.32497	1.44522	3.77478	5e-05	0.000441468	yes
XLOC_025641	XLOC_025641	grifin	chr3:41780642 41785960	wt	ele	OK	6.28659	17.1136	1.44479	4.57853	5e-05	0.000441468	yes
XLOC_017041	XLOC_017041	dtl	chr20:13056127 13089969	wt	ele	OK	6.49355	17.671	1.44431	5.3094	5e-05	0.000441468	yes
XLOC_000010	XLOC_000010		Zv9_NA110:3395 25537	wt	ele	OK	0.930326	2.53016	1.44342	2.5791	0.0002	0.00151135	yes
XLOC_028545	XLOC_028545		chr4:32093660 32095079	wt	ele	OK	3.17017	8.61632	1.44251	4.14666	5e-05	0.000441468	yes
XLOC_013828	XLOC_013828		chr18:14348409 14350046	wt	ele	OK	0.907357	2.46565	1.44222	2.83253	0.0002	0.00151135	yes
XLOC_025142	XLOC_025142	ZNF337	chr3:7787160 7812713	wt	ele	OK	0.937184	2.5449	1.4412	2.99576	5e-05	0.000441468	yes
XLOC_021152	XLOC_021152	si:dkey 109j17.4	chr23:19466440 19470938	wt	ele	OK	0.580081	1.57425	1.44034	1.66603	0.0015	0.00835025	yes
XLOC_026393	XLOC_026393	CR388132.1	chr4:28472176 28489528	wt	ele	OK	2.96597	8.03609	1.43799	3.84114	5e-05	0.000441468	yes
XLOC_002132	XLOC_002132	ncapd3	chr1:20323104 20345692	wt	ele	OK	10.803	29.2626	1.43762	6.049	5e-05	0.000441468	yes
XLOC_011558	XLOC_011558		chr16:58508066 58523757	wt	ele	OK	1.67476	4.53512	1.43719	3.13915	5e-05	0.000441468	yes
XLOC_018523	XLOC_018523	aqp7	chr21:10434511 10460143	wt	ele	OK	0.636226	1.72245	1.43685	2.31331	0.0018	0.00970567	yes
XLOC_012357	XLOC_012357	exo1	chr17:22395144 22403386	wt	ele	OK	4.73057	12.7896	1.43488	4.43653	5e-05	0.000441468	yes
XLOC_006471	XLOC_006471	mcph1	chr13:6213584 6251263	wt	ele	OK	2.35596	6.35071	1.4306	3.57133	5e-05	0.000441468	yes
XLOC_012904	XLOC_012904	si:dkeyp 1h4.9	chr18:7032703 7035514	wt	ele	OK	0.765893	2.06433	1.43046	2.14954	0.0006	0.0038638	yes
XLOC_025367	XLOC_025367	si:dkeyp 69e1.9	chr3:26954706 26958613	wt	ele	OK	4.32534	11.6418	1.42843	4.09183	5e-05	0.000441468	yes
XLOC_023176	XLOC_023176		chr25:238142 241045	wt	ele	OK	32.192	86.5926	1.42754	5.44095	5e-05	0.000441468	yes
XLOC_026673	XLOC_026673	BX936303.1	chr4:45524811 45531074	wt	ele	OK	1.35477	3.64398	1.42746	2.49454	0.0002	0.00151135	yes
XLOC_009021	XLOC_009021	HSPA8	chr15:18550703 18566760	wt	ele	OK	2.4456	6.57524	1.42685	2.5759	5e-05	0.000441468	yes
XLOC_016713	XLOC_016713		chr2:60298619 60300535	wt	ele	OK	0.571195	1.5348	1.42599	1.99207	0.0009	0.00542979	yes
XLOC_008560	XLOC_008560	srpx2	chr14:36661905 36682461	wt	ele	OK	0.46972	1.25905	1.42247	2.27335	0.00035	0.00245539	yes
XLOC_034550	XLOC_034550	zgc:194007	chr8:44753177 44765004	wt	ele	OK	0.61278	1.64003	1.42028	1.73487	0.0022	0.0114559	yes
XLOC_015671	XLOC_015671	ing5b	chr2:36326834 36329580	wt	ele	OK	6.67546	17.8621	1.41996	4.21609	5e-05	0.000441468	yes
XLOC_021505	XLOC_021505	ednrab	chr23:46043928 46055806	wt	ele	OK	0.976081	2.61125	1.41967	2.3794	5e-05	0.000441468	yes
XLOC_007213	XLOC_007213	vrk2	chr13:26927786 27023227	wt	ele	OK	3.45234	9.2181	1.41689	3.60721	5e-05	0.000441468	yes
XLOC_009531	XLOC_009531	ZBTB16	chr15:17197112 17306767	wt	ele	OK	1.77168	4.72446	1.41503	3.93369	5e-05	0.000441468	yes
XLOC_011884	XLOC_011884	greb1	chr17:30428311 30476890	wt	ele	OK	3.32034	8.84284	1.41318	4.4387	5e-05	0.000441468	yes
XLOC_014993	XLOC_014993	dclk3	chr19:44541160 44555925	wt	ele	OK	0.495597	1.31882	1.41201	1.91454	0.0007	0.00440717	yes
XLOC_024540	XLOC_024540		chr3:24412953 24437610	wt	ele	OK	4.87277	12.9582	1.41105	5.40798	5e-05	0.000441468	yes
XLOC_024926	XLOC_024926	notum1a	chr3:58762770 58800457	wt	ele	OK	4.53101	12.0447	1.4105	3.43697	5e-05	0.000441468	yes
XLOC_014037	XLOC_014037	cks1b	chr19:8457560 8460768	wt	ele	OK	16.7048	44.4021	1.41037	6.16904	5e-05	0.000441468	yes
XLOC_032267	XLOC_032267	si:dkeyp 33e11.2	chr7:6658159 6662391	wt	ele	OK	0.563599	1.49596	1.40833	1.41701	0.00215	0.0112474	yes
XLOC_032889	XLOC_032889	tpcn2	chr7:66330350 66378445	wt	ele	OK	2.41373	6.39434	1.40553	4.08834	5e-05	0.000441468	yes
XLOC_024239	XLOC_024239	ENSDARG00000044990	chr3:2115873 2124969	wt	ele	OK	2.17463	5.75228	1.40337	1.96569	0.0016	0.00880762	yes
XLOC_026097	XLOC_026097	mapk12b	chr4:5396938 5403690	wt	ele	OK	2.23768	5.90597	1.40017	3.20967	5e-05	0.000441468	yes
XLOC_020141	XLOC_020141	si:dkeyp 86c4.1 zgc:174642	chr22:30827706 30883747	wt	ele	OK	1.36516	3.60219	1.3998	2.12421	0.0002	0.00151135	yes
XLOC_025733	XLOC_025733	col5a3a	chr3:54421658 54614912	wt	ele	OK	0.809406	2.1346	1.39903	3.79353	5e-05	0.000441468	yes
XLOC_002303	XLOC_002303	dctd	chr1:40175764 40221985	wt	ele	OK	5.91938	15.5742	1.39564	4.299	5e-05	0.000441468	yes
XLOC_018899	XLOC_018899	fgf1b	chr21:42662923 42666251	wt	ele	OK	0.681687	1.79071	1.39335	2.52808	0.0003	0.00215436	yes
XLOC_005661	XLOC_005661	plaub	chr12:47820205 47838791	wt	ele	OK	0.422114	1.10695	1.39089	2.02208	0.0022	0.0114559	yes
XLOC_020419	XLOC_020419		chr22:8111050 8287661	wt	ele	OK	4.8027	12.5943	1.39085	3.18057	5e-05	0.000441468	yes
XLOC_001532	XLOC_001532	si:ch211 76m11.11	chr1:37578887 37622900	wt	ele	OK	1.2606	3.30256	1.38947	2.52238	5e-05	0.000441468	yes
XLOC_017351	XLOC_017351	esco2	chr20:39369597 39383863	wt	ele	OK	22.0264	57.6666	1.38851	6.40486	5e-05	0.000441468	yes
XLOC_008032	XLOC_008032	zic6	chr14:32887238 32927847	wt	ele	OK	4.94926	12.9325	1.38571	3.71258	5e-05	0.000441468	yes
XLOC_024884	XLOC_024884	col5a3a	chr3:54697354 54769855	wt	ele	OK	0.448216	1.17034	1.38467	2.78246	5e-05	0.000441468	yes
XLOC_005876	XLOC_005876	adam8b	chr12:9851164 9886884	wt	ele	OK	0.936314	2.43984	1.38172	2.85134	5e-05	0.000441468	yes
XLOC_002904	XLOC_002904	swi5	chr10:10694765 10703146	wt	ele	OK	4.38755	11.4173	1.37973	3.76308	5e-05	0.000441468	yes
XLOC_026994	XLOC_026994	si:ch211 241n15.2	chr4:55100104 55318522	wt	ele	OK	1.0304	2.68001	1.37904	2.16629	0.0012	0.00689731	yes
XLOC_001915	XLOC_001915	rdh8b	chr1:60269730 60279318	wt	ele	OK	1.32649	3.44576	1.37721	3.28489	5e-05	0.000441468	yes
XLOC_014116	XLOC_014116	lin28a	chr19:14873055 14904641	wt	ele	OK	6.02325	15.6454	1.37713	2.84292	5e-05	0.000441468	yes
XLOC_029243	XLOC_029243	ctsla	chr5:46423372 46429502	wt	ele	OK	342.632	889.107	1.3757	4.85962	5e-05	0.000441468	yes
XLOC_003120	XLOC_003120	si:ch211 222e20.4	chr10:29109635 29113590	wt	ele	OK	1.57513	4.08124	1.37354	2.79608	5e-05	0.000441468	yes
XLOC_011137	XLOC_011137	mms22l	chr16:34595901 34619811	wt	ele	OK	3.98202	10.3093	1.37238	3.48204	5e-05	0.000441468	yes
XLOC_003626	XLOC_003626	mir21 1	chr10:28879998 28880879	wt	ele	OK	4.55921	11.7902	1.37073	3.02916	5e-05	0.000441468	yes
XLOC_005870	XLOC_005870	egr2b	chr12:9238039 9258480	wt	ele	OK	0.530666	1.37033	1.36865	1.78148	0.00265	0.0133022	yes
XLOC_014496	XLOC_014496	btr18 btr20	chr19:2844512 2872223	wt	ele	OK	0.548794	1.41004	1.3614	1.88551	0.00025	0.00183251	yes
XLOC_023294	XLOC_023294	fanci	chr25:8655591 8721295	wt	ele	OK	3.73084	9.55259	1.35639	4.03167	5e-05	0.000441468	yes
XLOC_035817	XLOC_035817	si:rp71 84d19.2	chr9:28334221 28335123	wt	ele	OK	1.89847	4.85976	1.35605	2.85972	0.0005	0.0033237	yes
XLOC_026078	XLOC_026078	SLC13A4	chr4:4676859 4799529	wt	ele	OK	11.5893	29.6411	1.35481	3.08436	5e-05	0.000441468	yes
XLOC_023818	XLOC_023818	CR376785.2	chr25:16825082 16909141	wt	ele	OK	2.19724	5.61805	1.35438	3.433	5e-05	0.000441468	yes
XLOC_034405	XLOC_034405	atoh1a	chr8:30442027 30443657	wt	ele	OK	3.82841	9.78398	1.35368	4.30135	5e-05	0.000441468	yes
XLOC_005128	XLOC_005128		chr11:41941667 41944357	wt	ele	OK	0.333577	0.851091	1.35129	2.0855	0.0022	0.0114559	yes
XLOC_010193	XLOC_010193	ECM1	chr16:11307945 11319401	wt	ele	OK	3.59013	9.14909	1.34959	3.76823	5e-05	0.000441468	yes
XLOC_036484	XLOC_036484	mxc	chr9:33838838 33851885	wt	ele	OK	1.13838	2.89948	1.34882	3.0519	5e-05	0.000441468	yes
XLOC_006350	XLOC_006350		chr12:43709391 43713113	wt	ele	OK	0.386214	0.983407	1.34839	2.48282	0.00025	0.00183251	yes
XLOC_013936	XLOC_013936	CABZ01073736.1	chr19:1525562 1571258	wt	ele	OK	0.392864	0.999996	1.34789	2.49767	5e-05	0.000441468	yes
XLOC_032432	XLOC_032432	mus81	chr7:21008520 21037862	wt	ele	OK	6.52241	16.5937	1.34716	4.40208	5e-05	0.000441468	yes
XLOC_028368	XLOC_028368	ZNF70	chr4:57882911 57891694	wt	ele	OK	1.07377	2.72348	1.34277	2.70885	5e-05	0.000441468	yes
XLOC_025990	XLOC_025990		chr3:60520424 60521917	wt	ele	OK	1.74446	4.41401	1.33931	3.13499	5e-05	0.000441468	yes
XLOC_031614	XLOC_031614	znf326	chr6:21370288 21378274	wt	ele	OK	0.942018	2.38189	1.33828	2.42095	0.00015	0.00117124	yes
XLOC_025334	XLOC_025334	CR812472.2 CR812472.3	chr3:24492371 24496649	wt	ele	OK	1.57172	3.97269	1.33777	1.82309	0.0028	0.0139108	yes
XLOC_023090	XLOC_023090		chr24:16840894 16847417	wt	ele	OK	0.328446	0.829593	1.33674	2.78333	5e-05	0.000441468	yes
XLOC_012106	XLOC_012106	dnaaf2	chr17:4857 7774	wt	ele	OK	0.500657	1.26138	1.33311	2.02006	0.00155	0.00858623	yes
XLOC_027594	XLOC_027594	si:dkey 81i14.3	chr4:31804927 31810564	wt	ele	OK	1.0447	2.62875	1.33129	2.9637	5e-05	0.000441468	yes
XLOC_016308	XLOC_016308	urod	chr2:27699368 27724068	wt	ele	OK	14.8458	37.324	1.33004	3.22251	5e-05	0.000441468	yes
XLOC_030391	XLOC_030391	rad51d	chr5:62553317 62566216	wt	ele	OK	2.16082	5.42942	1.32922	2.88645	5e-05	0.000441468	yes
XLOC_032424	XLOC_032424		chr7:20709974 20716451	wt	ele	OK	14.3329	36.0052	1.32888	6.01051	5e-05	0.000441468	yes
XLOC_024629	XLOC_024629	si:dkey 13n23.3	chr3:30652086 30655538	wt	ele	OK	0.39436	0.989843	1.32769	2.28083	0.001	0.00592006	yes
XLOC_010677	XLOC_010677		chr16:54501791 54538335	wt	ele	OK	1.07578	2.69971	1.32742	2.95208	5e-05	0.000441468	yes
XLOC_020660	XLOC_020660	si:dkeyp 20e4.3	chr22:25518161 25521675	wt	ele	OK	0.446447	1.11987	1.32677	2.06776	0.0029	0.0143056	yes
XLOC_034527	XLOC_034527	si:ch211 170d8.2	chr8:41748563 41750788	wt	ele	OK	1.15936	2.90803	1.32671	2.6876	0.00035	0.00245539	yes
XLOC_019831	XLOC_019831	si:dkey 182g1.2	chr22:8774599 8795033	wt	ele	OK	2.76448	6.9302	1.32589	3.14407	5e-05	0.000441468	yes
XLOC_008085	XLOC_008085	neil3	chr14:37635214 37648796	wt	ele	OK	6.88909	17.2642	1.3254	4.31093	5e-05	0.000441468	yes
XLOC_019974	XLOC_019974	mef2b	chr22:18412131 18438843	wt	ele	OK	0.88455	2.21671	1.3254	2.12139	0.0017	0.00925703	yes
XLOC_014431	XLOC_014431	rrm2	chr19:49363392 49368575	wt	ele	OK	44.3991	111.255	1.32527	5.71591	5e-05	0.000441468	yes
XLOC_026998	XLOC_026998	si:dkey 149m13.4 zgc:173710	chr4:55576682 55623038	wt	ele	OK	2.9126	7.29798	1.32519	3.49771	5e-05	0.000441468	yes
XLOC_013100	XLOC_013100	blm	chr18:26215694 26396395	wt	ele	OK	4.96311	12.4276	1.32423	4.65694	5e-05	0.000441468	yes
XLOC_008420	XLOC_008420	HNRNPUL2	chr14:23481737 23498569	wt	ele	OK	3.75857	9.40991	1.324	4.32411	5e-05	0.000441468	yes
XLOC_005074	XLOC_005074		chr11:15687079 15690208	wt	ele	OK	0.990828	2.47796	1.32245	3.00843	5e-05	0.000441468	yes
XLOC_009572	XLOC_009572	zgc:162608	chr15:20822247 20839638	wt	ele	OK	8.5983	21.5004	1.32224	2.73342	5e-05	0.000441468	yes
XLOC_027835	XLOC_027835	si:ch211 120c15.1	chr4:37408830 37412961	wt	ele	OK	0.517948	1.29434	1.32134	2.09516	0.0011	0.00641906	yes
XLOC_024559	XLOC_024559	MKL1	chr3:24986070 25057771	wt	ele	OK	0.652194	1.62947	1.32103	2.60924	0.00015	0.00117124	yes
XLOC_034685	XLOC_034685	TMCC1	chr8:56132523 56150862	wt	ele	OK	0.539656	1.34754	1.32022	2.00549	0.0006	0.0038638	yes
XLOC_011391	XLOC_011391	fbxo43	chr16:58172416 58189258	wt	ele	OK	0.473325	1.1817	1.31996	1.92159	0.00165	0.00902625	yes
XLOC_007118	XLOC_007118	bhik	chr13:15534559 15622692	wt	ele	OK	7.86529	19.611	1.31809	2.98653	0.0001	0.000822847	yes
XLOC_010560	XLOC_010560	si:dkey 242e21.4	chr16:43012964 43020094	wt	ele	OK	1.87758	4.67912	1.31736	1.82735	0.0003	0.00215436	yes
XLOC_001307	XLOC_001307		chr1:13137923 13138715	wt	ele	OK	3.19658	7.94974	1.31438	1.95096	0.0021	0.0110272	yes
XLOC_034659	XLOC_034659	gins4	chr8:54694258 54710346	wt	ele	OK	8.15978	20.2863	1.31391	2.71717	5e-05	0.000441468	yes
XLOC_032457	XLOC_032457	AL935046.1	chr7:22489813 22794849	wt	ele	OK	0.500472	1.24373	1.31331	3.83624	5e-05	0.000441468	yes
XLOC_015537	XLOC_015537	si:dkeyp 7b3.1	chr2:24990340 24995543	wt	ele	OK	1.91182	4.74573	1.31169	2.38538	0.0002	0.00151135	yes
XLOC_009640	XLOC_009640	brip1	chr15:26765058 26871694	wt	ele	OK	4.12949	10.2363	1.30965	3.52381	5e-05	0.000441468	yes
XLOC_013369	XLOC_013369	si:dkey 81n9.2	chr18:4246641 4250783	wt	ele	OK	2.23104	5.52676	1.30872	3.28114	5e-05	0.000441468	yes
XLOC_005320	XLOC_005320	irf9	chr12:14388714 14412927	wt	ele	OK	2.72087	6.73383	1.30736	2.38157	0.0001	0.000822847	yes
XLOC_020476	XLOC_020476	sass6	chr22:10846058 10862635	wt	ele	OK	2.36079	5.83799	1.3062	4.02488	5e-05	0.000441468	yes
XLOC_036443	XLOC_036443	chaf1b	chr9:31576421 31589033	wt	ele	OK	10.4228	25.7676	1.30581	5.25794	5e-05	0.000441468	yes
XLOC_031238	XLOC_031238	APITD1	chr6:45871907 45874184	wt	ele	OK	6.44603	15.9032	1.30284	4.28621	5e-05	0.000441468	yes
XLOC_027298	XLOC_027298	arhgef39	chr4:11477726 11541752	wt	ele	OK	3.82928	9.44678	1.30275	3.65183	5e-05	0.000441468	yes
XLOC_024119	XLOC_024119		chr25:5069554 5071259	wt	ele	OK	2.05406	5.05875	1.3003	3.38855	5e-05	0.000441468	yes
XLOC_035768	XLOC_035768	tnfaip6	chr9:23797579 23813158	wt	ele	OK	2.77051	6.81938	1.29949	3.4638	5e-05	0.000441468	yes
XLOC_009588	XLOC_009588	hmbsb	chr15:22864924 22895692	wt	ele	OK	11.8877	29.152	1.29413	4.3806	5e-05	0.000441468	yes
XLOC_014563	XLOC_014563	tcf19l	chr19:7453822 7466518	wt	ele	OK	1.40809	3.45257	1.29393	3.86143	5e-05	0.000441468	yes
XLOC_019751	XLOC_019751	mibp	chr22:4759571 4850437	wt	ele	OK	7.43589	18.2159	1.29262	2.15977	0.0003	0.00215436	yes
XLOC_025249	XLOC_025249	bckdhbl	chr3:15853950 15909807	wt	ele	OK	9.58153	23.396	1.28794	2.41485	0.00125	0.00714484	yes
XLOC_035612	XLOC_035612	CCDC108	chr9:7753327 7814821	wt	ele	OK	0.620704	1.51338	1.2858	1.92811	0.00105	0.00617442	yes
XLOC_022683	XLOC_022683	elovl2	chr24:8660761 8688086	wt	ele	OK	0.919442	2.24122	1.28545	3.20181	5e-05	0.000441468	yes
XLOC_036675	XLOC_036675	fancb	chr9:56962644 56990531	wt	ele	OK	1.15667	2.81597	1.28366	2.15507	0.00055	0.00359953	yes
XLOC_003758	XLOC_003758	mmp30	chr10:40051609 40071814	wt	ele	OK	6.9915	16.9955	1.28148	4.74884	5e-05	0.000441468	yes
XLOC_034412	XLOC_034412	fancc	chr8:30960661 31006382	wt	ele	OK	2.04827	4.97665	1.28077	2.97294	5e-05	0.000441468	yes
XLOC_002409	XLOC_002409	mhc1zba	chr1:47652530 47659103	wt	ele	OK	5.19544	12.6095	1.2792	4.75218	5e-05	0.000441468	yes
XLOC_022761	XLOC_022761	zgc:112332	chr24:18997212 19016169	wt	ele	OK	4.09877	9.9457	1.27888	3.1201	5e-05	0.000441468	yes
XLOC_034215	XLOC_034215	cenph	chr8:17687275 17703899	wt	ele	OK	6.27714	15.1987	1.27577	2.49768	0.00045	0.00304428	yes
XLOC_022983	XLOC_022983	metrn	chr24:39444648 39459007	wt	ele	OK	19.0632	46.1244	1.27474	5.86359	5e-05	0.000441468	yes
XLOC_034702	XLOC_034702	znf367	chr8:1279022 1288619	wt	ele	OK	7.31697	17.6778	1.27262	3.87651	5e-05	0.000441468	yes
XLOC_035345	XLOC_035345	CABZ01074899.1	chr8:55150277 55161733	wt	ele	OK	0.777506	1.87689	1.27142	2.20369	0.00195	0.0103729	yes
XLOC_020626	XLOC_020626	chaf1a	chr22:22638356 22665386	wt	ele	OK	34.2135	82.5891	1.27138	5.39865	5e-05	0.000441468	yes
XLOC_017544	XLOC_017544	zgc:174972	chr20:17258 37643	wt	ele	OK	0.993036	2.39506	1.27014	2.34553	5e-05	0.000441468	yes
XLOC_025115	XLOC_025115	PKN1	chr3:6340297 6391294	wt	ele	OK	0.551047	1.32753	1.2685	2.29228	0.0008	0.00494223	yes
XLOC_007538	XLOC_007538		chr13:9636898 9640035	wt	ele	OK	0.35576	0.856679	1.26785	2.12386	0.00155	0.00858623	yes
XLOC_025737	XLOC_025737	dnmt1	chr3:55442889 55458870	wt	ele	OK	33.6316	80.9309	1.26688	4.69114	5e-05	0.000441468	yes
XLOC_006640	XLOC_006640	dna2	chr13:22961919 22979979	wt	ele	OK	4.73622	11.3868	1.26556	4.91249	5e-05	0.000441468	yes
XLOC_020353	XLOC_020353	PGBD4	chr22:5641319 5648374	wt	ele	OK	1.56395	3.75965	1.2654	3.22467	5e-05	0.000441468	yes
XLOC_020364	XLOC_020364	CU468041.1	chr22:5948658 5979143	wt	ele	OK	2.6823	6.44659	1.26506	3.43087	5e-05	0.000441468	yes
XLOC_020360	XLOC_020360	si:rp71 36a1.1	chr22:5832682 5842775	wt	ele	OK	1.89477	4.55228	1.26456	2.50307	0.0001	0.000822847	yes
XLOC_027927	XLOC_027927	si:dkey 54i3.3_2	chr4:40804359 40867939	wt	ele	OK	1.0458	2.51217	1.26432	2.12184	0.001	0.00592006	yes
XLOC_010698	XLOC_010698	trip13	chr16:56452411 56517756	wt	ele	OK	6.7604	16.2264	1.26317	2.47634	0.00015	0.00117124	yes
XLOC_024123	XLOC_024123		chr25:7322702 7324474	wt	ele	OK	1.24939	2.99786	1.26271	2.75395	5e-05	0.000441468	yes
XLOC_034351	XLOC_034351	zgc:173994	chr8:26152011 26154745	wt	ele	OK	2.64807	6.35153	1.26216	3.48867	5e-05	0.000441468	yes
XLOC_027806	XLOC_027806	si:ch211 271g18.4	chr4:36569894 36578464	wt	ele	OK	1.82641	4.3766	1.2608	2.23569	0.0007	0.00440717	yes
XLOC_018490	XLOC_018490	agxt2	chr21:9082001 9111144	wt	ele	OK	4.76553	11.4129	1.25996	3.76375	5e-05	0.000441468	yes
XLOC_020259	XLOC_020259		chr22:5653 9079	wt	ele	OK	5.76837	13.8085	1.25932	4.02934	5e-05	0.000441468	yes
XLOC_000515	XLOC_000515		Zv9_NA827:10224 13419	wt	ele	OK	0.971478	2.32391	1.2583	3.02339	5e-05	0.000441468	yes
XLOC_024901	XLOC_024901	BX088708.1	chr3:56418580 56583147	wt	ele	OK	4.02858	9.62881	1.25709	3.25601	5e-05	0.000441468	yes
XLOC_017089	XLOC_017089	fam167ab	chr20:18812677 18829604	wt	ele	OK	1.46874	3.50989	1.25685	3.11127	5e-05	0.000441468	yes
XLOC_026548	XLOC_026548	si:ch211 229l10.10	chr4:37927052 37933631	wt	ele	OK	1.91266	4.56463	1.25492	2.29892	0.0001	0.000822847	yes
XLOC_018280	XLOC_018280		chr20:25169235 25170213	wt	ele	OK	1.38458	3.30335	1.25449	2.39199	0.0016	0.00880762	yes
XLOC_026423	XLOC_026423	CR388095.3	chr4:30153057 30153930	wt	ele	OK	1.50647	3.59056	1.25304	2.45968	0.00165	0.00902625	yes
XLOC_000941	XLOC_000941		Zv9_scaffold3498:212977 215126	wt	ele	OK	1.76553	4.2067	1.25259	3.27444	5e-05	0.000441468	yes
XLOC_021698	XLOC_021698	ebp	chr23:19436446 19441928	wt	ele	OK	3.70963	8.83588	1.2521	3.05195	5e-05	0.000441468	yes
XLOC_021673	XLOC_021673	pm20d1.1 pm20d1.2	chr23:18164508 18202761	wt	ele	OK	1.62264	3.86354	1.25158	2.56866	5e-05	0.000441468	yes
XLOC_004054	XLOC_004054	gtpbp3	chr11:6044738 6072321	wt	ele	OK	0.829104	1.97403	1.25152	2.34908	0.0008	0.00494223	yes
XLOC_010423	XLOC_010423	glipr2l	chr16:29843227 29850422	wt	ele	OK	2.27612	5.41903	1.25146	3.15672	0.0001	0.000822847	yes
XLOC_031588	XLOC_031588	atad5b	chr6:19346305 19365609	wt	ele	OK	1.48695	3.53783	1.2505	2.27126	0.0002	0.00151135	yes
XLOC_001429	XLOC_001429	cbsa	chr1:27999244 28024172	wt	ele	OK	1.43356	3.4084	1.24949	2.67289	5e-05	0.000441468	yes
XLOC_021218	XLOC_021218	plekhn1	chr23:23526277 23547122	wt	ele	OK	2.28981	5.43132	1.24608	3.04861	5e-05	0.000441468	yes
XLOC_004566	XLOC_004566	ccl25b	chr11:6296248 6300315	wt	ele	OK	17.5052	41.5107	1.2457	4.30192	5e-05	0.000441468	yes
XLOC_028241	XLOC_028241	BX465205.1	chr4:52740751 52750683	wt	ele	OK	0.857833	2.03367	1.24532	2.07362	0.0009	0.00542979	yes
XLOC_019460	XLOC_019460		chr21:44155412 44160867	wt	ele	OK	4.59467	10.8821	1.24392	3.55187	5e-05	0.000441468	yes
XLOC_028921	XLOC_028921	si:dkey 13n15.11	chr5:23007695 23038588	wt	ele	OK	0.465095	1.10088	1.24306	2.23782	0.00045	0.00304428	yes
XLOC_031861	XLOC_031861	epha2	chr6:45811778 45846547	wt	ele	OK	10.7036	25.3238	1.2424	5.02688	5e-05	0.000441468	yes
XLOC_035862	XLOC_035862	zgc:113314	chr9:31454796 31460425	wt	ele	OK	3.92627	9.28488	1.24172	3.26812	5e-05	0.000441468	yes
XLOC_035668	XLOC_035668	si:ch211 67e16.2	chr9:14272449 14282105	wt	ele	OK	2.89415	6.84156	1.24119	2.73456	5e-05	0.000441468	yes
XLOC_014366	XLOC_014366	pogza	chr19:43953385 43976762	wt	ele	OK	3.97651	9.39382	1.24021	4.88403	5e-05	0.000441468	yes
XLOC_033209	XLOC_033209	e2f8	chr7:17351484 17373461	wt	ele	OK	12.8167	30.2614	1.23945	4.21974	5e-05	0.000441468	yes
XLOC_023701	XLOC_023701	fads2	chr25:4189904 4205135	wt	ele	OK	2.58949	6.11078	1.23869	3.03227	5e-05	0.000441468	yes
XLOC_010566	XLOC_010566	ccne2	chr16:43241773 43250825	wt	ele	OK	17.309	40.8415	1.23851	5.14582	5e-05	0.000441468	yes
XLOC_026977	XLOC_026977	si:dkey 156j15.1	chr4:54000961 54008829	wt	ele	OK	2.48727	5.85969	1.23626	1.88463	0.0015	0.00835025	yes
XLOC_009052	XLOC_009052		chr15:20874923 20907130	wt	ele	OK	0.630219	1.48262	1.23422	2.05871	0.0007	0.00440717	yes
XLOC_000626	XLOC_000626		Zv9_NA92:5822 17558	wt	ele	OK	1.44872	3.40347	1.23222	2.85017	0.0001	0.000822847	yes
XLOC_024925	XLOC_024925	stra13	chr3:58639825 58643911	wt	ele	OK	17.5624	41.2497	1.2319	3.47666	5e-05	0.000441468	yes
XLOC_011878	XLOC_011878		chr17:28881510 28890949	wt	ele	OK	0.646087	1.51643	1.23088	3.02633	5e-05	0.000441468	yes
XLOC_036492	XLOC_036492	si:ch211 125e6.8	chr9:34143776 34154996	wt	ele	OK	3.38913	7.95329	1.23064	2.1531	0.00015	0.00117124	yes
XLOC_024562	XLOC_024562	ENSDARG00000009313	chr3:25222422 25234511	wt	ele	OK	5.1628	12.0966	1.22837	4.04501	5e-05	0.000441468	yes
XLOC_000681	XLOC_000681		Zv9_NA95:35446 41137	wt	ele	OK	2.05885	4.81722	1.22636	2.41423	0.00055	0.00359953	yes
XLOC_030479	XLOC_030479	unga	chr5:70347705 70362252	wt	ele	OK	10.0264	23.4145	1.22359	4.00434	5e-05	0.000441468	yes
XLOC_017969	XLOC_017969	clu	chr20:39285087 39298696	wt	ele	OK	7.74792	18.0926	1.22352	3.41218	5e-05	0.000441468	yes
XLOC_026686	XLOC_026686	si:dkey 43f9.4	chr4:46575194 46817878	wt	ele	OK	4.06814	9.49934	1.22346	2.40772	5e-05	0.000441468	yes
XLOC_031237	XLOC_031237	rbp7b	chr6:45869489 45870404	wt	ele	OK	3.4561	8.04876	1.21962	3.00747	0.0017	0.00925703	yes
XLOC_025333	XLOC_025333	nfe2l1a	chr3:24362825 24384410	wt	ele	OK	0.745531	1.73537	1.2189	2.43661	0.00015	0.00117124	yes
XLOC_000529	XLOC_000529		Zv9_NA848:0 460	wt	ele	OK	4.38639	10.169	1.21307	3.25691	0.0009	0.00542979	yes
XLOC_018650	XLOC_018650	chek1	chr21:21673130 21680885	wt	ele	OK	11.8432	27.4561	1.21306	4.27814	5e-05	0.000441468	yes
XLOC_002136	XLOC_002136	si:ch211 134c9.2	chr1:20556617 20558296	wt	ele	OK	3.6769	8.51802	1.21203	3.06834	0.0009	0.00542979	yes
XLOC_026961	XLOC_026961	ZNF135	chr4:52705749 52708641	wt	ele	OK	0.829811	1.91871	1.20928	1.95559	0.00155	0.00858623	yes
XLOC_015448	XLOC_015448	olfml2bb	chr2:20374318 20384987	wt	ele	OK	1.83233	4.22909	1.20667	2.08206	0.00065	0.00413522	yes
XLOC_032507	XLOC_032507	haus3 poln	chr7:25558029 25620844	wt	ele	OK	6.85605	15.8173	1.20606	4.27724	5e-05	0.000441468	yes
XLOC_023785	XLOC_023785	gins3	chr25:13831992 13835680	wt	ele	OK	8.34665	19.2441	1.20515	4.27386	5e-05	0.000441468	yes
XLOC_022444	XLOC_022444	CR376848.1 nceh1b	chr24:27757677 27772951	wt	ele	OK	1.50995	3.47984	1.20452	2.58755	5e-05	0.000441468	yes
XLOC_009275	XLOC_009275	CABZ01114098.1	chr15:43740023 43880951	wt	ele	OK	1.31132	3.02174	1.20436	2.27311	0.00015	0.00117124	yes
XLOC_035243	XLOC_035243	si:ch211 163b2.4	chr8:46529216 46536116	wt	ele	OK	2.87775	6.63048	1.20417	3.36945	5e-05	0.000441468	yes
XLOC_021238	XLOC_021238	arhgap4a	chr23:25276725 25302880	wt	ele	OK	0.891476	2.05248	1.2031	2.55414	0.00015	0.00117124	yes
XLOC_012948	XLOC_012948	tat	chr18:12640430 12657213	wt	ele	OK	0.718978	1.6547	1.20255	2.25421	0.0011	0.00641906	yes
XLOC_017512	XLOC_017512	dio3b	chr20:54157671 54165789	wt	ele	OK	1.14837	2.6426	1.20237	2.89847	5e-05	0.000441468	yes
XLOC_029690	XLOC_029690	chek2	chr5:10954244 10989846	wt	ele	OK	3.93932	9.05939	1.20147	3.00869	5e-05	0.000441468	yes
XLOC_018805	XLOC_018805	nsd1b	chr21:36679000 36724657	wt	ele	OK	1.43792	3.30673	1.20142	2.00211	0.00015	0.00117124	yes
XLOC_029637	XLOC_029637	zgc:73226	chr5:6243429 6270967	wt	ele	OK	0.549802	1.26264	1.19947	2.12327	0.002	0.0105913	yes
XLOC_023638	XLOC_023638	FANCA	chr25:38456031 38470483	wt	ele	OK	2.71049	6.22298	1.19905	3.90514	5e-05	0.000441468	yes
XLOC_024986	XLOC_024986	noxo1a	chr3:62820102 62831176	wt	ele	OK	2.39915	5.50198	1.19743	3.37184	5e-05	0.000441468	yes
XLOC_009826	XLOC_009826	ctsc	chr15:42362039 42383557	wt	ele	OK	6.15689	14.1192	1.19739	4.84342	5e-05	0.000441468	yes
XLOC_034119	XLOC_034119	gpd1a	chr8:7602675 7622142	wt	ele	OK	6.7459	15.466	1.19701	3.61867	5e-05	0.000441468	yes
XLOC_026516	XLOC_026516	si:dkey 176f19.6	chr4:36108512 36115984	wt	ele	OK	0.840937	1.92516	1.19491	2.55047	0.0002	0.00151135	yes
XLOC_009611	XLOC_009611	EXO5	chr15:24437849 24447815	wt	ele	OK	2.28305	5.22531	1.19456	2.61031	5e-05	0.000441468	yes
XLOC_021021	XLOC_021021	ube2t	chr23:5244700 5248066	wt	ele	OK	13.494	30.8054	1.19086	4.84106	5e-05	0.000441468	yes
XLOC_028787	XLOC_028787	slc1a3a	chr5:8132017 8249687	wt	ele	OK	20.8806	47.583	1.18829	4.77688	5e-05	0.000441468	yes
XLOC_015352	XLOC_015352	gadd45aa	chr2:10071949 10075877	wt	ele	OK	3.83487	8.73406	1.18748	3.48858	5e-05	0.000441468	yes
XLOC_028574	XLOC_028574		chr4:36938623 36941349	wt	ele	OK	0.412953	0.939282	1.18558	1.98826	0.0023	0.0118645	yes
XLOC_012947	XLOC_012947		chr18:12611331 12635297	wt	ele	OK	1.13426	2.5759	1.18332	3.04536	5e-05	0.000441468	yes
XLOC_007010	XLOC_007010		chr13:5036594 5042467	wt	ele	OK	0.59221	1.34489	1.1833	1.96652	0.0018	0.00970567	yes
XLOC_004845	XLOC_004845	cflara	chr11:31207924 31216810	wt	ele	OK	2.39059	5.41254	1.17894	2.95747	5e-05	0.000441468	yes
XLOC_017633	XLOC_017633	ENSDARG00000039682	chr20:7245361 7255198	wt	ele	OK	21.7395	49.0745	1.17466	2.63375	5e-05	0.000441468	yes
XLOC_014503	XLOC_014503	RECQL4	chr19:3230779 3327110	wt	ele	OK	2.4057	5.4252	1.17322	3.00071	5e-05	0.000441468	yes
XLOC_017190	XLOC_017190	si:dkey 177p2.18	chr20:27032959 27044110	wt	ele	OK	1.41291	3.18584	1.17301	1.72829	0.00255	0.0129234	yes
XLOC_009681	XLOC_009681	lgals9l1 zgc:92326	chr15:30329806 30365148	wt	ele	OK	3.63839	8.18502	1.16969	3.46163	5e-05	0.000441468	yes
XLOC_001395	XLOC_001395	DCTPP1	chr1:23377311 23415647	wt	ele	OK	8.42916	18.9473	1.16853	2.58915	0.00025	0.00183251	yes
XLOC_014653	XLOC_014653	FP236813.1	chr19:12591636 12600231	wt	ele	OK	2.9972	6.73667	1.16842	1.78033	0.0014	0.00787496	yes
XLOC_002799	XLOC_002799	ERAP1	chr10:2926133 2948580	wt	ele	OK	1.24898	2.80703	1.1683	2.72178	5e-05	0.000441468	yes
XLOC_027217	XLOC_027217	mcm10	chr4:7031280 7049883	wt	ele	OK	4.15705	9.34074	1.16798	3.95183	5e-05	0.000441468	yes
XLOC_002456	XLOC_002456	junba	chr1:52226931 52228476	wt	ele	OK	3.83459	8.61354	1.16753	2.83706	5e-05	0.000441468	yes
XLOC_012569	XLOC_012569	tmem206	chr17:45546423 45554650	wt	ele	OK	3.30005	7.40844	1.16668	3.15911	5e-05	0.000441468	yes
XLOC_026562	XLOC_026562	si:dkeyp 109b10.4	chr4:38675067 38681730	wt	ele	OK	0.86028	1.93055	1.16613	1.98074	0.0014	0.00787496	yes
XLOC_012962	XLOC_012962	wfdc1	chr18:14181239 14203777	wt	ele	OK	8.85013	19.8576	1.16592	4.52112	5e-05	0.000441468	yes
XLOC_026258	XLOC_026258	ncaph2	chr4:17510114 17520422	wt	ele	OK	10.3894	23.2386	1.1614	4.55978	5e-05	0.000441468	yes
XLOC_018757	XLOC_018757	zgc:110224	chr21:29484786 29505906	wt	ele	OK	2.53273	5.66398	1.16112	3.36738	5e-05	0.000441468	yes
XLOC_029006	XLOC_029006	hdr	chr5:29049082 29060730	wt	ele	OK	5.77538	12.8755	1.15664	3.46352	5e-05	0.000441468	yes
XLOC_032516	XLOC_032516	krcp	chr7:26048762 26055725	wt	ele	OK	21.6352	48.2062	1.15584	5.35061	5e-05	0.000441468	yes
XLOC_016531	XLOC_016531	ncapd2	chr2:44811403 44839093	wt	ele	OK	29.24	65.1413	1.15563	4.73988	5e-05	0.000441468	yes
XLOC_027157	XLOC_027157	e2f7	chr4:2401850 2416468	wt	ele	OK	5.81794	12.9587	1.15535	4.20047	5e-05	0.000441468	yes
XLOC_000840	XLOC_000840		Zv9_scaffold3471:42518 44644	wt	ele	OK	3.60281	8.02458	1.15531	2.88739	0.0023	0.0118645	yes
XLOC_028843	XLOC_028843	pole	chr5:13945797 14007252	wt	ele	OK	6.7112	14.9436	1.15489	4.93832	5e-05	0.000441468	yes
XLOC_032818	XLOC_032818	cdt1	chr7:56781781 56803068	wt	ele	OK	6.18761	13.7582	1.15284	3.20783	5e-05	0.000441468	yes
XLOC_016762	XLOC_016762		chr2:18567513 18570445	wt	ele	OK	0.624143	1.38772	1.15277	2.28552	0.0006	0.0038638	yes
XLOC_003488	XLOC_003488	mamdc2b	chr10:15677430 15729414	wt	ele	OK	0.595657	1.32417	1.15253	1.85784	0.0011	0.00641906	yes
XLOC_003815	XLOC_003815	pcna	chr10:42187908 42192762	wt	ele	OK	328.153	728.818	1.15119	4.95729	5e-05	0.000441468	yes
XLOC_027717	XLOC_027717	si:dkey 207m2.4	chr4:34217540 34252303	wt	ele	OK	0.528968	1.17224	1.14802	2.14778	0.00035	0.00245539	yes
XLOC_036115	XLOC_036115	marco	chr9:781712 799576	wt	ele	OK	0.901722	1.99741	1.14738	2.00828	0.00055	0.00359953	yes
XLOC_025237	XLOC_025237	mvp	chr3:15290374 15339124	wt	ele	OK	19.887	44.0191	1.14631	4.0974	5e-05	0.000441468	yes
XLOC_006875	XLOC_006875	si:ch211 62a1.1	chr13:46407833 46411346	wt	ele	OK	2.26212	5.00614	1.14602	2.08162	0.0009	0.00542979	yes
XLOC_020884	XLOC_020884		chr22:5946608 5948567	wt	ele	OK	2.0797	4.60199	1.14588	3.07095	5e-05	0.000441468	yes
XLOC_012865	XLOC_012865	dut	chr18:4729029 4735630	wt	ele	OK	107.048	236.815	1.1455	4.91478	5e-05	0.000441468	yes
XLOC_030989	XLOC_030989	trim25	chr6:19509768 19522258	wt	ele	OK	2.15031	4.75024	1.14346	2.14931	5e-05	0.000441468	yes
XLOC_015367	XLOC_015367	greb1l	chr2:11527102 11624584	wt	ele	OK	3.04799	6.7303	1.14281	3.16168	5e-05	0.000441468	yes
XLOC_012410	XLOC_012410	E2F2	chr17:27084115 27107678	wt	ele	OK	7.7518	17.1145	1.14262	4.55975	5e-05	0.000441468	yes
XLOC_023243	XLOC_023243	lcat	chr25:5055715 5069468	wt	ele	OK	4.11774	9.09083	1.14256	2.73711	5e-05	0.000441468	yes
XLOC_005897	XLOC_005897	MKI67	chr12:11445702 11460368	wt	ele	OK	71.0981	156.91	1.14206	4.23772	5e-05	0.000441468	yes
XLOC_029516	XLOC_029516	ugt2a6	chr5:72885679 72895599	wt	ele	OK	1.7204	3.79602	1.14174	2.10837	0.001	0.00592006	yes
XLOC_011603	XLOC_011603	MCM8	chr17:4092748 4132653	wt	ele	OK	2.15504	4.75269	1.14103	3.18214	5e-05	0.000441468	yes
XLOC_012310	XLOC_012310	cyp26c1	chr17:19353008 19365481	wt	ele	OK	6.72817	14.8359	1.1408	4.81492	5e-05	0.000441468	yes
XLOC_021270	XLOC_021270	wnt1	chr23:27892333 27901771	wt	ele	OK	1.96112	4.32237	1.14015	2.43364	5e-05	0.000441468	yes
XLOC_032459	XLOC_032459	tmem88b	chr7:22955935 22974931	wt	ele	OK	7.62149	16.7909	1.13954	3.48025	5e-05	0.000441468	yes
XLOC_023412	XLOC_023412	sh3gl3b	chr25:20012968 20026403	wt	ele	OK	2.99376	6.58759	1.13779	2.54908	5e-05	0.000441468	yes
XLOC_023102	XLOC_023102		chr24:28588706 28590416	wt	ele	OK	0.875397	1.92541	1.13715	2.14326	0.00285	0.014106	yes
XLOC_023799	XLOC_023799	nav2b	chr25:14771449 14930303	wt	ele	OK	5.82588	12.8092	1.13664	4.13088	5e-05	0.000441468	yes
XLOC_013402	XLOC_013402	si:dkey 266m15.6	chr18:5984221 6068246	wt	ele	OK	3.61648	7.94758	1.13593	4.42667	5e-05	0.000441468	yes
XLOC_013395	XLOC_013395	ddx11	chr18:5565807 5620454	wt	ele	OK	2.29405	5.04024	1.13559	2.90316	5e-05	0.000441468	yes
XLOC_016000	XLOC_016000	dusp22b	chr2:1065669 1082702	wt	ele	OK	2.59593	5.70252	1.13535	2.35293	0.00015	0.00117124	yes
XLOC_013417	XLOC_013417	si:dkey 30c15.10 si:dkey 30c15.9	chr18:6890457 6911431	wt	ele	OK	12.0875	26.5487	1.13513	2.7154	5e-05	0.000441468	yes
XLOC_019258	XLOC_019258	zgc:110782	chr21:26587156 26589717	wt	ele	OK	1.65695	3.63822	1.1347	2.07132	0.00055	0.00359953	yes
XLOC_028797	XLOC_028797	C5H5orf34	chr5:9040289 9062012	wt	ele	OK	1.92687	4.21599	1.12961	1.98956	0.00065	0.00413522	yes
XLOC_004596	XLOC_004596	eltd1	chr11:7529197 7557492	wt	ele	OK	1.43121	3.12955	1.12872	2.62605	5e-05	0.000441468	yes
XLOC_027596	XLOC_027596	BX324003.1	chr4:31941328 32042427	wt	ele	OK	2.15912	4.71345	1.12634	3.08994	5e-05	0.000441468	yes
XLOC_005589	XLOC_005589	birc5a	chr12:36887883 36893786	wt	ele	OK	18.4827	40.3406	1.12606	4.48974	5e-05	0.000441468	yes
XLOC_012076	XLOC_012076	odc1	chr17:52270217 52283861	wt	ele	OK	51.5287	112.422	1.12548	4.85682	5e-05	0.000441468	yes
XLOC_008173	XLOC_008173	si:ch211 89f22.1	chr14:49797992 49801740	wt	ele	OK	2.94688	6.42618	1.12478	2.75277	0.0007	0.00440717	yes
XLOC_026659	XLOC_026659	si:ch211 59m15.1	chr4:44577930 44579316	wt	ele	OK	3.19012	6.9516	1.12374	2.19729	0.00045	0.00304428	yes
XLOC_028176	XLOC_028176	si:dkey 14o6.7	chr4:48718444 48786306	wt	ele	OK	1.65127	3.59676	1.12312	2.31461	0.0007	0.00440717	yes
XLOC_001365	XLOC_001365	PRIMPOL	chr1:20345962 20355665	wt	ele	OK	9.1446	19.91	1.1225	4.1487	5e-05	0.000441468	yes
XLOC_021583	XLOC_021583	phlda3	chr23:5806308 5809109	wt	ele	OK	5.50162	11.965	1.1209	3.82336	5e-05	0.000441468	yes
XLOC_014501	XLOC_014501	CDCA7L	chr19:2992291 3005973	wt	ele	OK	20.7772	45.1392	1.11938	4.43063	5e-05	0.000441468	yes
XLOC_008268	XLOC_008268	kazald2	chr14:5811096 5823208	wt	ele	OK	4.68581	10.1676	1.11761	3.0606	5e-05	0.000441468	yes
XLOC_034514	XLOC_034514	si:dkey 31n13.4	chr8:40822937 40835663	wt	ele	OK	0.433649	0.940399	1.11675	1.93674	0.0011	0.00641906	yes
XLOC_036038	XLOC_036038	CABZ01083696.1	chr9:51364353 51499700	wt	ele	OK	1.13027	2.45046	1.11639	2.27806	0.0001	0.000822847	yes
XLOC_022399	XLOC_022399	pola1	chr24:24445466 24540473	wt	ele	OK	12.8085	27.7507	1.11542	4.22258	5e-05	0.000441468	yes
XLOC_031890	XLOC_031890	ngf	chr6:49110019 49156545	wt	ele	OK	3.1295	6.77782	1.11489	2.52441	5e-05	0.000441468	yes
XLOC_008898	XLOC_008898	RNF14	chr15:3635133 3645721	wt	ele	OK	0.726304	1.57229	1.11422	2.21853	0.0001	0.000822847	yes
XLOC_034840	XLOC_034840	serping1	chr8:14366949 14489577	wt	ele	OK	1.64405	3.55646	1.11319	1.89153	0.0022	0.0114559	yes
XLOC_034899	XLOC_034899	mutyh	chr8:18723279 18731334	wt	ele	OK	3.87383	8.37877	1.11298	3.27229	5e-05	0.000441468	yes
XLOC_009825	XLOC_009825	rab38a	chr15:42326196 42361200	wt	ele	OK	5.40209	11.6823	1.11274	2.62792	5e-05	0.000441468	yes
XLOC_017166	XLOC_017166	aasdh	chr20:25675065 25688979	wt	ele	OK	1.89945	4.10718	1.11257	2.12972	0.00025	0.00183251	yes
XLOC_004493	XLOC_004493	nuf2	chr11:416540 425283	wt	ele	OK	21.4754	46.3918	1.11118	4.46123	5e-05	0.000441468	yes
XLOC_019333	XLOC_019333	kif20a	chr21:33815222 33892436	wt	ele	OK	19.2597	41.5853	1.11049	4.25433	5e-05	0.000441468	yes
XLOC_002682	XLOC_002682		chr1:27792352 27796115	wt	ele	OK	0.593195	1.28065	1.1103	2.32773	0.00015	0.00117124	yes
XLOC_022724	XLOC_022724	terf1	chr24:13241243 13253660	wt	ele	OK	5.71578	12.3371	1.10998	2.98477	5e-05	0.000441468	yes
XLOC_002529	XLOC_002529	C3	chr1:56576601 56626806	wt	ele	OK	8.88656	19.1635	1.10867	4.37839	5e-05	0.000441468	yes
XLOC_026893	XLOC_026893	ZNF768	chr4:51178371 51181301	wt	ele	OK	1.57784	3.3951	1.1055	2.1354	0.00085	0.00519023	yes
XLOC_032167	XLOC_032167	CABZ01101003.1	chr7:1613071 1619104	wt	ele	OK	3.16529	6.80162	1.10354	2.20126	0.0002	0.00151135	yes
XLOC_033698	XLOC_033698	haus6	chr7:65672242 65681470	wt	ele	OK	9.01039	19.3615	1.10353	4.03142	5e-05	0.000441468	yes
XLOC_035754	XLOC_035754	si:dkey 57a22.11 si:dkey 57a22.12	chr9:23010727 23019494	wt	ele	OK	6.44782	13.8393	1.10189	4.30316	5e-05	0.000441468	yes
XLOC_026518	XLOC_026518	ZNF135	chr4:36517251 36529640	wt	ele	OK	0.455542	0.97666	1.10027	1.96957	0.0026	0.0131123	yes
XLOC_023081	XLOC_023081		chr24:9071957 9075435	wt	ele	OK	0.689386	1.47644	1.09874	2.37456	0.0004	0.00274441	yes
XLOC_031537	XLOC_031537	arl6ip6	chr6:13254959 13286125	wt	ele	OK	3.0306	6.48596	1.09771	3.16961	5e-05	0.000441468	yes
XLOC_016274	XLOC_016274	hltf	chr2:24706354 24731591	wt	ele	OK	4.87809	10.4301	1.09637	2.47376	5e-05	0.000441468	yes
XLOC_019925	XLOC_019925	gtpbp1l	chr22:14981137 14996572	wt	ele	OK	4.61197	9.847	1.0943	3.80176	5e-05	0.000441468	yes
XLOC_035557	XLOC_035557	pde11a	chr9:1493595 1568692	wt	ele	OK	0.817283	1.74322	1.09285	2.8247	5e-05	0.000441468	yes
XLOC_022350	XLOC_022350	CSPP1	chr24:19224526 19281840	wt	ele	OK	1.57505	3.35946	1.09283	2.31987	0.00015	0.00117124	yes
XLOC_032807	XLOC_032807	ano1	chr7:54892544 55001626	wt	ele	OK	2.16914	4.62227	1.09148	3.0454	5e-05	0.000441468	yes
XLOC_028308	XLOC_028308	si:dkey 196n19.1	chr4:55631393 55644219	wt	ele	OK	0.755645	1.61017	1.09144	1.84365	0.0009	0.00542979	yes
XLOC_032610	XLOC_032610	ccnb2	chr7:31962885 31967624	wt	ele	OK	6.94993	14.8015	1.09067	3.48439	5e-05	0.000441468	yes
XLOC_023533	XLOC_023533	ticrr	chr25:31306092 31327621	wt	ele	OK	5.41333	11.5253	1.09021	4.48035	5e-05	0.000441468	yes
XLOC_009727	XLOC_009727	agmo	chr15:33630975 33714780	wt	ele	OK	1.11635	2.37644	1.09002	1.98479	0.0009	0.00542979	yes
XLOC_019822	XLOC_019822	CABZ01077217.1	chr22:8345938 8365483	wt	ele	OK	4.05696	8.63076	1.08909	2.89515	5e-05	0.000441468	yes
XLOC_014855	XLOC_014855	E2F3	chr19:29757139 29777212	wt	ele	OK	14.6169	31.0902	1.08883	4.60748	5e-05	0.000441468	yes
XLOC_012971	XLOC_012971	si:dkey 103i16.6	chr18:14858026 14915752	wt	ele	OK	1.62635	3.45841	1.08847	2.10577	0.0015	0.00835025	yes
XLOC_012172	XLOC_012172	si:ch73 340m8.2	chr17:5589343 5621997	wt	ele	OK	1.31054	2.78601	1.08804	2.31411	0.0001	0.000822847	yes
XLOC_009705	XLOC_009705	AL929092.1	chr15:30861582 30885608	wt	ele	OK	1.55839	3.31229	1.08777	2.52157	5e-05	0.000441468	yes
XLOC_021121	XLOC_021121		chr23:17583255 17591924	wt	ele	OK	1.31758	2.7999	1.08748	2.46506	0.0004	0.00274441	yes
XLOC_011060	XLOC_011060	RBM12B	chr16:29789352 29809727	wt	ele	OK	3.9192	8.32775	1.08737	2.18514	0.0019	0.0101433	yes
XLOC_020352	XLOC_020352	si:ch73 353p21.5	chr22:5606721 5637880	wt	ele	OK	6.0624	12.8717	1.08624	2.05189	0.0002	0.00151135	yes
XLOC_022418	XLOC_022418	zgc:174160	chr24:25817943 25852597	wt	ele	OK	5.52262	11.7219	1.08579	2.82719	5e-05	0.000441468	yes
XLOC_026437	XLOC_026437	PEG3 si:dkeyp 4f2.2 si:dkeyp 4f2.3	chr4:31296580 31391304	wt	ele	OK	5.90214	12.5271	1.08575	3.20708	5e-05	0.000441468	yes
XLOC_034814	XLOC_034814	phf19	chr8:12857498 12920609	wt	ele	OK	1.89582	4.02328	1.08555	2.55448	5e-05	0.000441468	yes
XLOC_034144	XLOC_034144	pim2	chr8:9472702 9478902	wt	ele	OK	7.90629	16.7767	1.08539	3.92113	5e-05	0.000441468	yes
XLOC_017278	XLOC_017278	C20H1orf112	chr20:34019172 34034843	wt	ele	OK	4.91703	10.4332	1.08532	3.86201	5e-05	0.000441468	yes
XLOC_022280	XLOC_022280		chr24:10198586 10207456	wt	ele	OK	1.54644	3.28123	1.08529	2.24069	0.00035	0.00245539	yes
XLOC_022452	XLOC_022452	ek1	chr24:28418662 28587234	wt	ele	OK	5.47167	11.6096	1.08526	3.72312	5e-05	0.000441468	yes
XLOC_024056	XLOC_024056	rbl2	chr25:37098858 37132094	wt	ele	OK	3.19207	6.77123	1.08493	4.19119	5e-05	0.000441468	yes
XLOC_020511	XLOC_020511		chr22:13420368 13489532	wt	ele	OK	1.35177	2.8663	1.08435	2.56851	0.0002	0.00151135	yes
XLOC_008017	XLOC_008017	BX511227.1	chr14:32343766 32345652	wt	ele	OK	2.46992	5.23442	1.08357	2.04765	0.00065	0.00413522	yes
XLOC_011350	XLOC_011350		chr16:54499411 54501040	wt	ele	OK	1.89041	4.00577	1.08338	2.26226	0.00175	0.00947703	yes
XLOC_022643	XLOC_022643	agtr1b cpb1	chr24:4835110 4938409	wt	ele	OK	1.13268	2.39871	1.08252	1.72885	0.00175	0.00947703	yes
XLOC_007995	XLOC_007995	hmmr	chr14:29565319 29588274	wt	ele	OK	17.0559	36.1195	1.08251	4.62619	5e-05	0.000441468	yes
XLOC_025454	XLOC_025454	zgc:112484	chr3:32362171 32427074	wt	ele	OK	5.7809	12.2268	1.08069	3.55181	5e-05	0.000441468	yes
XLOC_029476	XLOC_029476	kntc1	chr5:69428448 69508975	wt	ele	OK	9.47496	20.0376	1.08052	3.64803	5e-05	0.000441468	yes
XLOC_014934	XLOC_014934	anln	chr19:36981398 36999022	wt	ele	OK	17.1414	36.2385	1.08004	4.24384	5e-05	0.000441468	yes
XLOC_007646	XLOC_007646	aurkb	chr14:2646 7578	wt	ele	OK	49.9516	105.526	1.07899	5.45113	5e-05	0.000441468	yes
XLOC_022294	XLOC_022294	fen1	chr24:11681047 11693950	wt	ele	OK	43.1955	91.2445	1.07885	4.6035	5e-05	0.000441468	yes
XLOC_034929	XLOC_034929	acer1	chr8:20770438 20783910	wt	ele	OK	2.97632	6.2847	1.07831	2.72872	5e-05	0.000441468	yes
XLOC_020649	XLOC_020649	si:rp71 23d18.2 vtg1 vtg4 vtg5 vtg7	chr22:25203434 25330520	wt	ele	OK	1.00444	2.12033	1.0779	1.28716	0.0004	0.00274441	yes
XLOC_028989	XLOC_028989	dhfr	chr5:27782861 27791037	wt	ele	OK	10.9217	23.0478	1.07743	4.03842	5e-05	0.000441468	yes
XLOC_023686	XLOC_023686	INCENP	chr25:3555052 3581419	wt	ele	OK	56.1135	118.406	1.07733	4.08081	5e-05	0.000441468	yes
XLOC_010836	XLOC_010836	CEP192	chr16:11691160 11878578	wt	ele	OK	4.5067	9.50806	1.07708	2.62849	0.0001	0.000822847	yes
XLOC_008697	XLOC_008697		chr14:1768305 1769692	wt	ele	OK	3.99578	8.41632	1.07471	3.25454	5e-05	0.000441468	yes
XLOC_026493	XLOC_026493	si:dkey 16p19.5	chr4:34889963 34901070	wt	ele	OK	3.8355	8.07742	1.07448	1.94233	0.00205	0.0108054	yes
XLOC_013637	XLOC_013637	gins2	chr18:30425307 30443767	wt	ele	OK	10.8996	22.9467	1.07401	4.07939	5e-05	0.000441468	yes
XLOC_012497	XLOC_012497	myo6b	chr17:36853956 37009527	wt	ele	OK	3.3139	6.97601	1.07387	3.81523	5e-05	0.000441468	yes
XLOC_006876	XLOC_006876	olig4	chr13:46534585 46535661	wt	ele	OK	12.2851	25.8508	1.0733	4.34442	5e-05	0.000441468	yes
XLOC_010407	XLOC_010407	rad54b	chr16:28982869 29008433	wt	ele	OK	2.13159	4.48165	1.0721	3.29068	5e-05	0.000441468	yes
XLOC_028306	XLOC_028306	si:dkey 149m13.5	chr4:55566410 55574530	wt	ele	OK	3.38292	7.11008	1.0716	3.15557	5e-05	0.000441468	yes
XLOC_031725	XLOC_031725	nasp	chr6:33596045 33614433	wt	ele	OK	85.9204	180.343	1.06967	4.51544	5e-05	0.000441468	yes
XLOC_006849	XLOC_006849	cyp1b1	chr13:42664243 42673248	wt	ele	OK	2.2823	4.7901	1.06957	3.0467	5e-05	0.000441468	yes
XLOC_035014	XLOC_035014	suv39h1b	chr8:26603138 26663886	wt	ele	OK	11.454	24.0168	1.06819	2.08684	0.0025	0.0127162	yes
XLOC_019528	XLOC_019528		chr21:22448786 22453089	wt	ele	OK	10.0432	21.0574	1.0681	4.68885	5e-05	0.000441468	yes
XLOC_022793	XLOC_022793	spice1	chr24:21931561 21952077	wt	ele	OK	2.36533	4.95528	1.06693	2.8206	5e-05	0.000441468	yes
XLOC_019213	XLOC_019213	zbtb16a	chr21:22491203 22585568	wt	ele	OK	11.2937	23.6418	1.06582	3.88056	5e-05	0.000441468	yes
XLOC_007186	XLOC_007186	rhoua	chr13:24592208 24603161	wt	ele	OK	4.14128	8.66625	1.06533	3.65133	5e-05	0.000441468	yes
XLOC_020561	XLOC_020561	si:ch211 197g15.9	chr22:17684632 17687922	wt	ele	OK	1.35543	2.83536	1.06478	2.18732	0.00015	0.00117124	yes
XLOC_016757	XLOC_016757		chr2:14794765 14798558	wt	ele	OK	0.373685	0.781482	1.06439	1.89151	0.00285	0.014106	yes
XLOC_011369	XLOC_011369	NOD1	chr16:57287827 57304363	wt	ele	OK	0.589217	1.23202	1.06415	1.91887	0.00065	0.00413522	yes
XLOC_006306	XLOC_006306		chr12:17080305 17087086	wt	ele	OK	1.07293	2.24238	1.06347	3.20994	5e-05	0.000441468	yes
XLOC_028960	XLOC_028960	ercc6l	chr5:25582519 25595454	wt	ele	OK	10.1606	21.2315	1.06322	4.72235	5e-05	0.000441468	yes
XLOC_016525	XLOC_016525	LIG1	chr2:44362776 44405822	wt	ele	OK	25.5453	53.3656	1.06285	4.37621	5e-05	0.000441468	yes
XLOC_014722	XLOC_014722	snx10a	chr19:20253050 20264973	wt	ele	OK	1.90089	3.97068	1.06271	1.83085	0.0017	0.00925703	yes
XLOC_002210	XLOC_002210	poglut1	chr1:27805288 27820099	wt	ele	OK	12.2456	25.5723	1.06232	3.72483	5e-05	0.000441468	yes
XLOC_018727	XLOC_018727	cfb	chr21:26810677 26825806	wt	ele	OK	13.2118	27.5491	1.06018	4.28373	5e-05	0.000441468	yes
XLOC_028517	XLOC_028517		chr4:28491259 28492810	wt	ele	OK	1.17763	2.45263	1.05844	2.15082	0.00215	0.0112474	yes
XLOC_015994	XLOC_015994	wrnip1	chr2:394829 410278	wt	ele	OK	1.14297	2.37996	1.05815	2.38878	0.00025	0.00183251	yes
XLOC_021323	XLOC_021323	armc1l	chr23:32139928 32157923	wt	ele	OK	21.1984	44.1391	1.0581	3.51099	5e-05	0.000441468	yes
XLOC_017962	XLOC_017962	cad	chr20:38813027 38852588	wt	ele	OK	22.9161	47.7116	1.05798	3.99348	5e-05	0.000441468	yes
XLOC_013754	XLOC_013754	kcnj1a.2 kcnj1a.3 kcnj1a.4 kcnj1a.5	chr18:47062019 47093833	wt	ele	OK	4.92603	10.2516	1.05736	3.15563	5e-05	0.000441468	yes
XLOC_016119	XLOC_016119	cdc7	chr2:10654924 10669092	wt	ele	OK	5.57471	11.5833	1.05508	2.96518	5e-05	0.000441468	yes
XLOC_034535	XLOC_034535		chr8:42695511 42715818	wt	ele	OK	2.04291	4.2397	1.05334	2.53965	5e-05	0.000441468	yes
XLOC_036620	XLOC_036620	dhrs9	chr9:49753357 49783501	wt	ele	OK	2.19144	4.54634	1.05282	2.48443	0.0007	0.00440717	yes
XLOC_022441	XLOC_022441	cldn11b	chr24:27229142 27238109	wt	ele	OK	5.60603	11.6289	1.05267	3.29982	5e-05	0.000441468	yes
XLOC_021342	XLOC_021342	si:ch211 210c8.6	chr23:33952885 33971760	wt	ele	OK	12.2379	25.3841	1.05257	3.21014	5e-05	0.000441468	yes
XLOC_030848	XLOC_030848	ccdc65	chr6:7338712 7345371	wt	ele	OK	1.17979	2.44713	1.05256	1.81216	0.0017	0.00925703	yes
XLOC_021203	XLOC_021203	dhrs3a	chr23:21957772 21968821	wt	ele	OK	2.99398	6.20768	1.05199	3.04532	0.0001	0.000822847	yes
XLOC_022237	XLOC_022237	zic4	chr24:5054609 5062137	wt	ele	OK	6.77905	14.0535	1.05177	3.72622	5e-05	0.000441468	yes
XLOC_034428	XLOC_034428	derl3	chr8:31769444 31777680	wt	ele	OK	2.47053	5.12054	1.05148	2.83285	0.0001	0.000822847	yes
XLOC_031669	XLOC_031669	dtymk	chr6:26799055 26817072	wt	ele	OK	14.8042	30.6645	1.05057	2.67623	5e-05	0.000441468	yes
XLOC_015918	XLOC_015918	loxl5b	chr2:56225102 56254977	wt	ele	OK	0.976611	2.01929	1.04799	1.87674	0.0021	0.0110272	yes
XLOC_007780	XLOC_007780	MLF1IP	chr14:4616737 4630219	wt	ele	OK	2.0635	4.26643	1.04794	2.03178	0.0008	0.00494223	yes
XLOC_034885	XLOC_034885	pola2	chr8:17687275 17703899	wt	ele	OK	15.2329	31.4517	1.04595	3.85717	5e-05	0.000441468	yes
XLOC_015064	XLOC_015064	ANXA9	chr19:50020045 50037660	wt	ele	OK	1.02105	2.1077	1.04561	2.07654	0.00285	0.014106	yes
XLOC_016431	XLOC_016431		chr2:37534686 37536097	wt	ele	OK	2.22009	4.58094	1.04503	2.44501	0.0007	0.00440717	yes
XLOC_030780	XLOC_030780	si:ch73 379f7.5	chr6:359735 397918	wt	ele	OK	0.616503	1.27204	1.04497	2.04825	0.0013	0.00738609	yes
XLOC_021987	XLOC_021987	cyp2aa9	chr23:42888155 42901803	wt	ele	OK	6.36013	13.1223	1.04489	3.71751	5e-05	0.000441468	yes
XLOC_008871	XLOC_008871	smc4	chr15:1529849 1568335	wt	ele	OK	26.5356	54.5876	1.04065	4.53447	5e-05	0.000441468	yes
XLOC_001694	XLOC_001694	otx1a	chr1:51428666 51439475	wt	ele	OK	5.74219	11.8086	1.04017	3.10392	5e-05	0.000441468	yes
XLOC_009392	XLOC_009392	slc25a15a	chr15:3364312 3391454	wt	ele	OK	1.85082	3.80571	1.04	2.50271	0.0004	0.00274441	yes
XLOC_023993	XLOC_023993	CEP152 slc27a2b	chr25:33273359 33341953	wt	ele	OK	4.92016	10.1159	1.03984	3.94543	5e-05	0.000441468	yes
XLOC_023277	XLOC_023277		chr25:7339230 7347102	wt	ele	OK	4.05562	8.33404	1.03909	2.10005	0.0004	0.00274441	yes
XLOC_005308	XLOC_005308	top2a	chr12:11702255 11719558	wt	ele	OK	60.4971	124.159	1.03725	4.50554	5e-05	0.000441468	yes
XLOC_020068	XLOC_020068	cfhl5	chr22:24286453 24301215	wt	ele	OK	2.85146	5.85183	1.03719	2.65362	0.0004	0.00274441	yes
XLOC_013313	XLOC_013313	si:ch211 136a13.1	chr18:48076739 48099079	wt	ele	OK	4.27709	8.77154	1.0362	3.53771	5e-05	0.000441468	yes
XLOC_022202	XLOC_022202	si:dkey 225n22.4	chr24:541585 587862	wt	ele	OK	0.579097	1.18718	1.03567	2.07062	0.00105	0.00617442	yes
XLOC_026450	XLOC_026450	zgc:174654	chr4:32230629 32234210	wt	ele	OK	1.48599	3.04534	1.03518	2.25364	0.0003	0.00215436	yes
XLOC_024401	XLOC_024401		chr3:13949169 13981083	wt	ele	OK	5.65104	11.5694	1.03372	2.52054	0.0001	0.000822847	yes
XLOC_029016	XLOC_029016	ncaph	chr5:29904203 29915494	wt	ele	OK	19.4236	39.7634	1.03363	4.73189	5e-05	0.000441468	yes
XLOC_001927	XLOC_001927	pros1	chr1:217982 228857	wt	ele	OK	2.45293	5.01988	1.03315	2.67713	5e-05	0.000441468	yes
XLOC_006529	XLOC_006529	prepl	chr13:10186451 10213475	wt	ele	OK	1.76499	3.61095	1.03271	2.56787	5e-05	0.000441468	yes
XLOC_015553	XLOC_015553	efna2	chr2:26451796 26592673	wt	ele	OK	6.0876	12.4396	1.03099	3.98345	5e-05	0.000441468	yes
XLOC_021955	XLOC_021955	MDP1	chr23:41030005 41040760	wt	ele	OK	10.8722	22.2046	1.03022	3.88581	5e-05	0.000441468	yes
XLOC_023181	XLOC_023181	VWA5A	chr25:290618 309837	wt	ele	OK	10.7589	21.9702	1.03002	3.40772	5e-05	0.000441468	yes
XLOC_030474	XLOC_030474	cdca5	chr5:70170755 70176273	wt	ele	OK	15.3708	31.372	1.02929	4.53064	5e-05	0.000441468	yes
XLOC_011741	XLOC_011741	neurlb	chr17:20330438 20348778	wt	ele	OK	0.968063	1.97472	1.02847	2.25151	0.00055	0.00359953	yes
XLOC_017811	XLOC_017811	si:dkey 25e12.3	chr20:26573289 26580840	wt	ele	OK	1.79328	3.65685	1.028	1.92913	0.00025	0.00183251	yes
XLOC_017293	XLOC_017293	mcm3	chr20:34794804 34893422	wt	ele	OK	6.4416	13.118	1.02606	2.31047	0.00055	0.00359953	yes
XLOC_002242	XLOC_002242	cenpk	chr1:30962710 30970084	wt	ele	OK	10.448	21.2527	1.02442	3.40354	5e-05	0.000441468	yes
XLOC_011654	XLOC_011654	TONSL	chr17:8645138 8699524	wt	ele	OK	3.58302	7.28728	1.02421	3.74156	5e-05	0.000441468	yes
XLOC_005547	XLOC_005547	cpn1	chr12:33296005 33318398	wt	ele	OK	30.786	62.5775	1.02337	4.28252	5e-05	0.000441468	yes
XLOC_013231	XLOC_013231	VWA7	chr18:38819903 38847567	wt	ele	OK	5.88955	11.9667	1.0228	3.58871	5e-05	0.000441468	yes
XLOC_026605	XLOC_026605	CR854899.1	chr4:41480492 41491655	wt	ele	OK	0.672009	1.36518	1.02254	2.09301	0.00165	0.00902625	yes
XLOC_028743	XLOC_028743	haus4	chr5:1813096 1834555	wt	ele	OK	10.0344	20.3814	1.0223	3.46334	5e-05	0.000441468	yes
XLOC_021111	XLOC_021111	zgc:173570	chr23:17001780 17020233	wt	ele	OK	1.26239	2.5621	1.02118	2.15857	0.0017	0.00925703	yes
XLOC_003147	XLOC_003147	CKAP2	chr10:33005696 33013085	wt	ele	OK	14.1746	28.7598	1.02074	4.21799	5e-05	0.000441468	yes
XLOC_005433	XLOC_005433	wnt3	chr12:23614307 23662752	wt	ele	OK	2.78321	5.64585	1.02044	3.19953	5e-05	0.000441468	yes
XLOC_021325	XLOC_021325	tmem194a	chr23:32180618 32192222	wt	ele	OK	6.47798	13.1362	1.01994	3.78871	5e-05	0.000441468	yes
XLOC_030684	XLOC_030684		chr5:47159650 47161500	wt	ele	OK	2.58101	5.23038	1.01898	2.86028	5e-05	0.000441468	yes
XLOC_022246	XLOC_022246	mastl	chr24:5976512 5991620	wt	ele	OK	8.80558	17.8364	1.01834	3.2844	5e-05	0.000441468	yes
XLOC_020497	XLOC_020497	CABZ01044943.1	chr22:12326464 12381398	wt	ele	OK	3.0036	6.07907	1.01716	1.76513	0.0018	0.00970567	yes
XLOC_017120	XLOC_017120	jag2	chr20:21463355 21547780	wt	ele	OK	7.15429	14.4675	1.01594	4.20628	5e-05	0.000441468	yes
XLOC_012303	XLOC_012303	vrk1	chr17:18604113 18627398	wt	ele	OK	13.845	27.9906	1.01558	3.67669	5e-05	0.000441468	yes
XLOC_009325	XLOC_009325	KIAA1731	chr15:118416 120824	wt	ele	OK	10.1857	20.583	1.01491	2.32373	0.0001	0.000822847	yes
XLOC_001706	XLOC_001706	etaa1	chr1:52046069 52054757	wt	ele	OK	2.86476	5.78252	1.01328	2.8952	5e-05	0.000441468	yes
XLOC_004476	XLOC_004476	sp1	chr11:87172 95396	wt	ele	OK	6.27086	12.6551	1.01299	3.56291	5e-05	0.000441468	yes
XLOC_011405	XLOC_011405		chr16:13623 14729	wt	ele	OK	3.10338	6.26285	1.01298	2.66959	0.0002	0.00151135	yes
XLOC_021407	XLOC_021407	sall4	chr23:39046101 39054442	wt	ele	OK	4.45967	8.9992	1.01286	4.10065	5e-05	0.000441468	yes
XLOC_017791	XLOC_017791	paics	chr20:25647720 25674757	wt	ele	OK	174.822	352.639	1.0123	4.17787	5e-05	0.000441468	yes
XLOC_025048	XLOC_025048	si:dkey 88j15.5	chr3:3187105 3191292	wt	ele	OK	4.96008	9.99479	1.01081	2.04053	0.00075	0.00467724	yes
XLOC_023324	XLOC_023324	CR384059.2	chr25:12762186 12767427	wt	ele	OK	2.14005	4.31217	1.01077	2.5187	0.0004	0.00274441	yes
XLOC_008170	XLOC_008170	CCNA2	chr14:49280470 49286571	wt	ele	OK	73.03	147.014	1.00939	3.46248	5e-05	0.000441468	yes
XLOC_017578	XLOC_017578	bub1	chr20:2638648 2669924	wt	ele	OK	16.0587	32.3243	1.00927	4.28844	5e-05	0.000441468	yes
XLOC_021660	XLOC_021660	dnmt5	chr23:17131888 17152704	wt	ele	OK	4.80136	9.65714	1.00815	2.72099	5e-05	0.000441468	yes
XLOC_001175	XLOC_001175	kpnb3	chr1:2017192 2056339	wt	ele	OK	52.5104	105.581	1.00767	4.0543	5e-05	0.000441468	yes
XLOC_022962	XLOC_022962	naglu	chr24:37800072 37813116	wt	ele	OK	3.09762	6.22524	1.00697	3.4034	5e-05	0.000441468	yes
XLOC_021046	XLOC_021046	RBBP8NL	chr23:7544636 7577597	wt	ele	OK	2.56756	5.15788	1.00638	3.27049	5e-05	0.000441468	yes
XLOC_034205	XLOC_034205	cdkn2c	chr8:16927283 16931529	wt	ele	OK	2.02289	4.06331	1.00624	2.19831	0.00065	0.00413522	yes
XLOC_024480	XLOC_024480	kri1 spc24	chr3:19158183 19185879	wt	ele	OK	31.5398	63.346	1.00608	3.98966	5e-05	0.000441468	yes
XLOC_005476	XLOC_005476	C12H17orf70	chr12:28109891 28130681	wt	ele	OK	2.62502	5.2701	1.0055	2.88318	5e-05	0.000441468	yes
XLOC_030810	XLOC_030810	rad54l	chr6:3280973 3298674	wt	ele	OK	5.82823	11.6985	1.00519	3.86079	5e-05	0.000441468	yes
XLOC_008650	XLOC_008650	ccna2	chr14:49305379 49310057	wt	ele	OK	52.698	105.684	1.00394	4.11668	5e-05	0.000441468	yes
XLOC_018191	XLOC_018191	PLCB1	chr20:55093814 55147355	wt	ele	OK	2.01001	4.03071	1.00383	1.85611	0.00245	0.0124941	yes
XLOC_006153	XLOC_006153	rnf213b	chr12:37723793 37931071	wt	ele	OK	6.5267	13.0856	1.00355	2.73361	5e-05	0.000441468	yes
XLOC_007173	XLOC_007173	PRIM2	chr13:23712171 23836259	wt	ele	OK	17.584	35.2128	1.00184	3.9835	5e-05	0.000441468	yes
XLOC_003995	XLOC_003995	mybl2	chr11:1516848 1539928	wt	ele	OK	9.42366	18.8515	1.00032	3.90922	5e-05	0.000441468	yes
XLOC_020079	XLOC_020079	SSX2IP	chr22:25186708 25198168	wt	ele	OK	4.72361	9.44567	0.999763	2.95713	5e-05	0.000441468	yes
XLOC_009268	XLOC_009268	NUMA1	chr15:42966019 42981892	wt	ele	OK	10.9616	21.9117	0.99924	4.10057	5e-05	0.000441468	yes
XLOC_006905	XLOC_006905	EGLN1	chr13:50154055 50185317	wt	ele	OK	2.22657	4.44848	0.998488	2.01901	0.0011	0.00641906	yes
XLOC_033210	XLOC_033210	dbx1a	chr7:17799841 17803249	wt	ele	OK	21.9969	43.9396	0.998223	4.60286	5e-05	0.000441468	yes
XLOC_016966	XLOC_016966	TRAF3IP2	chr20:3442984 3455196	wt	ele	OK	2.91061	5.80901	0.996971	2.16913	0.00065	0.00413522	yes
XLOC_010607	XLOC_010607	ATAD2	chr16:46270341 46287229	wt	ele	OK	17.3623	34.6374	0.996378	4.35342	5e-05	0.000441468	yes
XLOC_018190	XLOC_018190	PLCB1	chr20:55093814 55147355	wt	ele	OK	2.51182	5.00496	0.994628	2.52302	0.00025	0.00183251	yes
XLOC_009791	XLOC_009791	CCDC150	chr15:39774842 39816421	wt	ele	OK	0.911039	1.81506	0.99443	2.31925	0.0002	0.00151135	yes
XLOC_018104	XLOC_018104	nkx2.2b	chr20:49095817 49145612	wt	ele	OK	1.90879	3.80144	0.993888	2.23118	0.00065	0.00413522	yes
XLOC_011559	XLOC_011559	pole2	chr17:112 3745	wt	ele	OK	11.6183	23.1272	0.993196	3.12486	5e-05	0.000441468	yes
XLOC_006770	XLOC_006770	arg2	chr13:33248148 33257976	wt	ele	OK	2.27757	4.53367	0.993186	2.78668	5e-05	0.000441468	yes
XLOC_027041	XLOC_027041	si:ch211 238e22.2 si:ch211 238e22.5	chr4:58087273 58095042	wt	ele	OK	5.01243	9.97732	0.993141	3.06477	5e-05	0.000441468	yes
XLOC_017884	XLOC_017884	nr2e1	chr20:32476276 32485287	wt	ele	OK	7.95057	15.8256	0.993129	4.06292	5e-05	0.000441468	yes
XLOC_001141	XLOC_001141	cenpe	chr1:134700 170776	wt	ele	OK	20.8141	41.3884	0.991661	3.65635	5e-05	0.000441468	yes
XLOC_004530	XLOC_004530	cdk2	chr11:3281631 3288790	wt	ele	OK	21.4165	42.5567	0.990664	4.04647	5e-05	0.000441468	yes
XLOC_015771	XLOC_015771	zgc:152670	chr2:44409990 44424444	wt	ele	OK	1.40306	2.78538	0.989303	2.15857	0.0004	0.00274441	yes
XLOC_012997	XLOC_012997	chtf8	chr18:16680546 16696843	wt	ele	OK	5.69069	11.2913	0.988533	2.79841	0.00015	0.00117124	yes
XLOC_010602	XLOC_010602	dbf4	chr16:45981957 45993436	wt	ele	OK	5.86961	11.6442	0.988279	3.54438	5e-05	0.000441468	yes
XLOC_023847	XLOC_023847	poc1b	chr25:18854216 18923382	wt	ele	OK	4.06688	8.06321	0.987432	3.18637	5e-05	0.000441468	yes
XLOC_029440	XLOC_029440	TTF1	chr5:66575651 66587054	wt	ele	OK	3.33781	6.61548	0.986943	2.51685	5e-05	0.000441468	yes
XLOC_033268	XLOC_033268		chr7:19821514 19827398	wt	ele	OK	0.612814	1.2143	0.986603	1.91296	0.00285	0.014106	yes
XLOC_013096	XLOC_013096	si:ch211 39k3.2	chr18:25536286 25555248	wt	ele	OK	7.26844	14.4002	0.98637	2.88808	0.0004	0.00274441	yes
XLOC_007026	XLOC_007026	tnfaip2b	chr13:6779767 6791402	wt	ele	OK	4.30557	8.5281	0.986022	2.2422	0.00015	0.00117124	yes
XLOC_019447	XLOC_019447	oatx	chr21:42634170 42654794	wt	ele	OK	10.4148	20.6115	0.984814	2.36274	5e-05	0.000441468	yes
XLOC_028727	XLOC_028727	ass1	chr5:500765 544869	wt	ele	OK	17.744	35.0254	0.981073	3.00425	5e-05	0.000441468	yes
XLOC_015816	XLOC_015816	pax3a	chr2:47580838 47641979	wt	ele	OK	5.04792	9.95664	0.979969	3.43597	5e-05	0.000441468	yes
XLOC_026301	XLOC_026301	mdm2	chr4:22061378 22071816	wt	ele	OK	35.4795	69.9773	0.979901	3.43518	5e-05	0.000441468	yes
XLOC_005335	XLOC_005335	adprh	chr12:16028128 16075734	wt	ele	OK	5.12278	10.1028	0.979751	2.82413	5e-05	0.000441468	yes
XLOC_001166	XLOC_001166	atp1a1a.3	chr1:1562079 1572446	wt	ele	OK	8.8163	17.3783	0.979038	4.15213	5e-05	0.000441468	yes
XLOC_010108	XLOC_010108	foxi1	chr16:2302273 2304041	wt	ele	OK	1.77924	3.50688	0.978929	2.34061	0.00135	0.00762084	yes
XLOC_013482	XLOC_013482	rfx4	chr18:14918083 14959949	wt	ele	OK	8.05628	15.8784	0.978876	3.68678	5e-05	0.000441468	yes
XLOC_021750	XLOC_021750	her9	chr23:23693661 23695447	wt	ele	OK	32.9502	64.8268	0.976301	4.13179	5e-05	0.000441468	yes
XLOC_034661	XLOC_034661	nr6a1a	chr8:54781718 54804470	wt	ele	OK	1.56794	3.08249	0.975228	1.99368	0.0006	0.0038638	yes
XLOC_023507	XLOC_023507	cadps2	chr25:28804288 29136657	wt	ele	OK	1.6132	3.17041	0.974743	1.72656	0.00115	0.00665512	yes
XLOC_016648	XLOC_016648	tpm4b	chr2:55995982 56031817	wt	ele	OK	7.74474	15.2193	0.974613	3.18029	5e-05	0.000441468	yes
XLOC_007691	XLOC_007691		chr14:1757253 1768254	wt	ele	OK	4.95712	9.7398	0.974389	2.82155	0.0002	0.00151135	yes
XLOC_012461	XLOC_012461	vsx2	chr17:31709969 31719135	wt	ele	OK	14.2748	28.0317	0.973586	3.66252	5e-05	0.000441468	yes
XLOC_008278	XLOC_008278	eif4ebp3l	chr14:6939193 6953894	wt	ele	OK	19.9508	39.1771	0.973565	4.3713	5e-05	0.000441468	yes
XLOC_001380	XLOC_001380	GSG2	chr1:22263362 22332102	wt	ele	OK	6.90578	13.5489	0.972305	2.90388	5e-05	0.000441468	yes
XLOC_017442	XLOC_017442	si:ch73 21k16.5	chr20:47198897 47221523	wt	ele	OK	1.02912	2.01745	0.97113	1.93791	0.00225	0.0116701	yes
XLOC_010557	XLOC_010557	cenpw rspo3	chr16:42798037 43005545	wt	ele	OK	14.6439	28.7071	0.971107	3.81168	5e-05	0.000441468	yes
XLOC_009324	XLOC_009324		chr15:112475 116105	wt	ele	OK	7.51168	14.7224	0.970803	2.809	5e-05	0.000441468	yes
XLOC_036151	XLOC_036151	cdca7a	chr9:2878270 2890758	wt	ele	OK	37.8062	74.0653	0.970172	4.09852	5e-05	0.000441468	yes
XLOC_033274	XLOC_033274		chr7:20202918 20214548	wt	ele	OK	1.34974	2.64324	0.969623	2.32208	0.0002	0.00151135	yes
XLOC_018780	XLOC_018780	C21HXorf40A	chr21:33044886 33049876	wt	ele	OK	2.07073	4.05385	0.969153	2.40574	0.0005	0.0033237	yes
XLOC_004588	XLOC_004588	SNORD12	chr11:7383998 7385701	wt	ele	OK	12.87	25.1883	0.968738	2.46136	5e-05	0.000441468	yes
XLOC_029764	XLOC_029764	ranbp1	chr5:20790449 20798382	wt	ele	OK	144.53	282.852	0.968675	3.63779	5e-05	0.000441468	yes
XLOC_017263	XLOC_017263	mycn	chr20:33333308 33338265	wt	ele	OK	28.6618	56.0778	0.968301	4.12761	5e-05	0.000441468	yes
XLOC_033778	XLOC_033778	METTL4	chr7:75264027 75272814	wt	ele	OK	1.18736	2.32191	0.967559	2.2729	0.00035	0.00245539	yes
XLOC_002408	XLOC_002408	mhc1zca	chr1:47637894 47648897	wt	ele	OK	1.20909	2.36373	0.967144	1.70181	0.00225	0.0116701	yes
XLOC_029285	XLOC_029285	msh3	chr5:52934994 53311893	wt	ele	OK	0.992856	1.93966	0.966147	2.17262	0.00015	0.00117124	yes
XLOC_022732	XLOC_022732	rttn	chr24:15036260 15167226	wt	ele	OK	1.61761	3.16013	0.966123	2.52257	0.00015	0.00117124	yes
XLOC_019247	XLOC_019247	zgc:110540	chr21:25879335 25883673	wt	ele	OK	26.4576	51.6816	0.965972	4.55138	5e-05	0.000441468	yes
XLOC_033204	XLOC_033204	btr04 btr06	chr7:16941961 16980218	wt	ele	OK	5.91685	11.5557	0.965699	2.6317	0.0001	0.000822847	yes
XLOC_006464	XLOC_006464		chr13:5129397 5165944	wt	ele	OK	1.50623	2.94166	0.965684	2.07115	0.0004	0.00274441	yes
XLOC_004387	XLOC_004387	AL929022.2	chr11:39072109 39090544	wt	ele	OK	1.02399	1.99905	0.965112	1.86586	0.00175	0.00947703	yes
XLOC_018832	XLOC_018832		chr21:38718301 38726231	wt	ele	OK	6.71656	13.1097	0.964836	3.93759	5e-05	0.000441468	yes
XLOC_032704	XLOC_032704	ncapg2	chr7:41598126 41620274	wt	ele	OK	11.0738	21.6001	0.963888	3.23867	5e-05	0.000441468	yes
XLOC_002334	XLOC_002334	bdh2	chr1:44096668 44110096	wt	ele	OK	9.79942	19.1064	0.963285	2.92675	5e-05	0.000441468	yes
XLOC_019218	XLOC_019218	rfc2	chr21:24484009 24491337	wt	ele	OK	14.0112	27.3019	0.962425	3.6335	5e-05	0.000441468	yes
XLOC_019034	XLOC_019034	si:dkey 163m14.2	chr21:7347432 7359201	wt	ele	OK	1.31881	2.56974	0.962382	2.07842	0.00055	0.00359953	yes
XLOC_016487	XLOC_016487	gbp1	chr2:42122032 42136425	wt	ele	OK	1.53735	2.99476	0.961991	1.96058	0.0003	0.00215436	yes
XLOC_001381	XLOC_001381	ncapg	chr1:22333571 22370015	wt	ele	OK	33.9378	66.0911	0.961564	3.08019	5e-05	0.000441468	yes
XLOC_016059	XLOC_016059	prdx1	chr2:5748880 5758078	wt	ele	OK	77.9633	151.775	0.961066	4.09363	5e-05	0.000441468	yes
XLOC_004879	XLOC_004879	traip	chr11:36003614 36011950	wt	ele	OK	6.31623	12.291	0.960468	3.60016	5e-05	0.000441468	yes
XLOC_005287	XLOC_005287	dnajc9	chr12:10235052 10264605	wt	ele	OK	26.9505	52.4237	0.959907	3.5344	5e-05	0.000441468	yes
XLOC_009870	XLOC_009870	chd	chr15:46135866 46173284	wt	ele	OK	1.2046	2.34253	0.959515	2.27758	0.00035	0.00245539	yes
XLOC_010531	XLOC_010531	map7d1a	chr16:39984863 40095968	wt	ele	OK	5.65142	10.9892	0.959397	2.19801	0.0001	0.000822847	yes
XLOC_034769	XLOC_034769	si:ch211 255g12.7	chr8:7449910 7467268	wt	ele	OK	15.6735	30.4696	0.959046	2.68248	5e-05	0.000441468	yes
XLOC_000168	XLOC_000168		Zv9_NA363:2472 24247	wt	ele	OK	16.4113	31.8921	0.958512	3.98405	5e-05	0.000441468	yes
XLOC_009355	XLOC_009355	CR478286.1	chr15:1572645 1579283	wt	ele	OK	2.01986	3.92419	0.958139	2.24568	0.00115	0.00665512	yes
XLOC_032655	XLOC_032655	tppp3	chr7:36684324 36696951	wt	ele	OK	3.46721	6.72755	0.956306	2.38922	5e-05	0.000441468	yes
XLOC_006749	XLOC_006749	gdf10a	chr13:31509179 31514306	wt	ele	OK	15.0522	29.2035	0.956165	3.80318	5e-05	0.000441468	yes
XLOC_023974	XLOC_023974	si:ch211 93f2.1	chr25:31352582 31419481	wt	ele	OK	5.36172	10.3978	0.955513	3.81571	5e-05	0.000441468	yes
XLOC_026465	XLOC_026465	CR407594.2	chr4:33168205 33177519	wt	ele	OK	2.96758	5.74553	0.953151	2.12031	0.00035	0.00245539	yes
XLOC_009170	XLOC_009170	brca2	chr15:31158344 31175009	wt	ele	OK	2.43991	4.72274	0.952799	3.69931	5e-05	0.000441468	yes
XLOC_033144	XLOC_033144	f13a1b	chr7:9077450 9152613	wt	ele	OK	5.60652	10.8394	0.951107	3.2663	5e-05	0.000441468	yes
XLOC_028403	XLOC_028403	zgc:165515	chr4:59330119 59349465	wt	ele	OK	3.61835	6.99395	0.950776	2.75822	5e-05	0.000441468	yes
XLOC_024411	XLOC_024411	CR855387.1	chr3:14781893 14792027	wt	ele	OK	2.69679	5.21124	0.950381	2.05994	0.0003	0.00215436	yes
XLOC_020568	XLOC_020568	HMHA1 hmha1	chr22:17835922 17877001	wt	ele	OK	0.776374	1.4977	0.947926	1.88131	0.0013	0.00738609	yes
XLOC_000372	XLOC_000372		Zv9_NA662:46 3333	wt	ele	OK	6.29065	12.1331	0.94767	2.20616	0.00035	0.00245539	yes
XLOC_009787	XLOC_009787	CR388129.1	chr15:38774825 38813030	wt	ele	OK	5.20323	10.0329	0.94726	2.94682	5e-05	0.000441468	yes
XLOC_026653	XLOC_026653	si:dkey 220a11.10	chr4:44285975 44295069	wt	ele	OK	2.18588	4.20852	0.945099	1.99591	0.001	0.00592006	yes
XLOC_008256	XLOC_008256	CU638740.3	chr14:4342244 4355012	wt	ele	OK	2.96071	5.69505	0.943765	2.20557	0.00035	0.00245539	yes
XLOC_035045	XLOC_035045	tuba8l	chr8:29198440 29202948	wt	ele	OK	302.79	582.124	0.943011	3.92421	5e-05	0.000441468	yes
XLOC_012074	XLOC_012074	zgc:113142	chr17:52153516 52205532	wt	ele	OK	2.28651	4.3946	0.942587	2.254	0.0011	0.00641906	yes
XLOC_036555	XLOC_036555	bard1	chr9:41705650 41756776	wt	ele	OK	2.16239	4.1558	0.942499	2.6105	5e-05	0.000441468	yes
XLOC_019376	XLOC_019376		chr21:38712869 38715504	wt	ele	OK	11.3159	21.7297	0.941315	3.65409	5e-05	0.000441468	yes
XLOC_034911	XLOC_034911	cpox	chr8:19121104 19137938	wt	ele	OK	10.2912	19.7598	0.941153	3.48909	5e-05	0.000441468	yes
XLOC_019299	XLOC_019299	rrm1	chr21:29535096 29550709	wt	ele	OK	91.6829	175.742	0.938738	3.8955	5e-05	0.000441468	yes
XLOC_011849	XLOC_011849	acss1	chr17:25675691 25695147	wt	ele	OK	4.20749	8.06297	0.938353	3.34578	5e-05	0.000441468	yes
XLOC_036088	XLOC_036088		chr9:57919877 57950580	wt	ele	OK	3.17591	6.07725	0.936248	2.52967	0.0001	0.000822847	yes
XLOC_018308	XLOC_018308		chr20:47887354 47890376	wt	ele	OK	0.733115	1.40275	0.936147	1.95239	0.0022	0.0114559	yes
XLOC_027586	XLOC_027586	zgc:171626	chr4:31273069 31281817	wt	ele	OK	1.95743	3.74375	0.935524	2.37386	0.0001	0.000822847	yes
XLOC_033339	XLOC_033339	ptgr1	chr7:25543156 25557970	wt	ele	OK	57.3814	109.682	0.934675	4.03699	5e-05	0.000441468	yes
XLOC_027206	XLOC_027206	foxm1	chr4:5671389 5708367	wt	ele	OK	9.73701	18.6095	0.93449	3.38689	5e-05	0.000441468	yes
XLOC_016170	XLOC_016170	atr	chr2:16204487 16270102	wt	ele	OK	3.37295	6.44569	0.934322	3.55244	5e-05	0.000441468	yes
XLOC_031217	XLOC_031217	gpx1b	chr6:42269718 42272629	wt	ele	OK	3.75063	7.16707	0.93425	2.4791	0.00125	0.00714484	yes
XLOC_020972	XLOC_020972	stxbp3	chr23:1684700 1721389	wt	ele	OK	10.7309	20.4999	0.933852	4.04861	5e-05	0.000441468	yes
XLOC_004057	XLOC_004057	nr2f6b	chr11:6150116 6168241	wt	ele	OK	17.0592	32.5883	0.933809	3.89847	5e-05	0.000441468	yes
XLOC_012186	XLOC_012186	cenpo	chr17:6291901 6299775	wt	ele	OK	3.53303	6.74851	0.933662	2.62298	0.0002	0.00151135	yes
XLOC_019509	XLOC_019509		chr21:9970631 9971665	wt	ele	OK	2.52441	4.82087	0.933347	2.2312	0.00245	0.0124941	yes
XLOC_028107	XLOC_028107	CR450785.2	chr4:45853745 45939686	wt	ele	OK	1.3697	2.61524	0.933085	1.74071	0.002	0.0105913	yes
XLOC_011259	XLOC_011259	thbs3a	chr16:45737484 45771384	wt	ele	OK	1.82024	3.47436	0.932615	2.74836	5e-05	0.000441468	yes
XLOC_017366	XLOC_017366	mcm9	chr20:41833643 41871798	wt	ele	OK	1.97914	3.77514	0.931652	2.70238	5e-05	0.000441468	yes
XLOC_015447	XLOC_015447	si:ch211 267e7.2	chr2:20308865 20325163	wt	ele	OK	1.00958	1.92559	0.931554	1.95344	0.00125	0.00714484	yes
XLOC_010616	XLOC_010616	dnase2	chr16:48401685 48421041	wt	ele	OK	2.30321	4.39242	0.931373	2.16764	0.0005	0.0033237	yes
XLOC_017508	XLOC_017508	bub1ba	chr20:53824766 53859791	wt	ele	OK	8.82975	16.8203	0.929759	3.29598	5e-05	0.000441468	yes
XLOC_012273	XLOC_012273	wdhd1	chr17:14991017 15030636	wt	ele	OK	11.797	22.4679	0.929443	3.74651	5e-05	0.000441468	yes
XLOC_021477	XLOC_021477	si:ch73 265d7.2	chr23:44747431 44758085	wt	ele	OK	5.38698	10.2574	0.929122	1.94722	0.0016	0.00880762	yes
XLOC_001253	XLOC_001253	chtf18	chr1:8275114 8304091	wt	ele	OK	6.63319	12.6271	0.928748	3.68495	5e-05	0.000441468	yes
XLOC_023281	XLOC_023281	CDKN1C	chr25:7783604 7784647	wt	ele	OK	3.07882	5.85939	0.928372	2.30356	0.0024	0.0122682	yes
XLOC_018499	XLOC_018499	oacyl	chr21:9364146 9382247	wt	ele	OK	8.34262	15.8616	0.926962	3.48158	5e-05	0.000441468	yes
XLOC_034937	XLOC_034937	haus5	chr8:21415556 21452847	wt	ele	OK	6.31327	12.001	0.926701	2.73602	5e-05	0.000441468	yes
XLOC_032199	XLOC_032199	slc12a10.2	chr7:4504025 4550128	wt	ele	OK	2.651	5.03832	0.926405	2.87506	5e-05	0.000441468	yes
XLOC_002628	XLOC_002628	lpar2b	chr1:59937887 59962126	wt	ele	OK	9.25837	17.5933	0.926192	3.35415	5e-05	0.000441468	yes
XLOC_026056	XLOC_026056	CU694453.2	chr4:2126936 2143568	wt	ele	OK	1.38001	2.62096	0.925418	1.90718	0.00145	0.00810809	yes
XLOC_024638	XLOC_024638	si:dkey 66i24.9	chr3:31244573 31248649	wt	ele	OK	3.7439	7.10899	0.925101	3.09411	5e-05	0.000441468	yes
XLOC_007486	XLOC_007486	ss18l2	chr13:52334010 52336258	wt	ele	OK	17.254	32.7481	0.924485	3.96368	5e-05	0.000441468	yes
XLOC_025362	XLOC_025362	atad5a	chr3:26768642 26790755	wt	ele	OK	9.21883	17.4884	0.923745	3.74552	5e-05	0.000441468	yes
XLOC_025084	XLOC_025084	ZC3H7B ZC3H7B	chr3:4626878 5067806	wt	ele	OK	3.26697	6.19679	0.923568	1.99711	0.0006	0.0038638	yes
XLOC_029784	XLOC_029784	si:ch211 225b11.1	chr5:22570099 22597975	wt	ele	OK	3.52584	6.68486	0.922929	2.48608	5e-05	0.000441468	yes
XLOC_021745	XLOC_021745	ca6	chr23:22929074 22944810	wt	ele	OK	34.7179	65.7884	0.922153	3.95094	5e-05	0.000441468	yes
XLOC_018455	XLOC_018455	TAF1C	chr21:5780195 5818929	wt	ele	OK	3.46764	6.56734	0.921356	2.0182	0.0012	0.00689731	yes
XLOC_004822	XLOC_004822	CASS4	chr11:28620058 28655621	wt	ele	OK	1.44863	2.73995	0.919465	2.36536	0.0001	0.000822847	yes
XLOC_030440	XLOC_030440	ANXA1	chr5:67503836 67514158	wt	ele	OK	14.3225	27.0843	0.91918	2.9451	5e-05	0.000441468	yes
XLOC_002024	XLOC_002024	casc5	chr1:10270473 10301481	wt	ele	OK	10.8259	20.4606	0.918361	3.61861	5e-05	0.000441468	yes
XLOC_010439	XLOC_010439	nes	chr16:31271825 31282459	wt	ele	OK	10.7961	20.3946	0.91767	3.90636	5e-05	0.000441468	yes
XLOC_014219	XLOC_014219	jarid2b	chr19:26456714 26644445	wt	ele	OK	0.433516	0.818612	0.917093	1.91521	0.00195	0.0103729	yes
XLOC_034084	XLOC_034084	crb2b	chr8:2991886 3073643	wt	ele	OK	0.777691	1.46818	0.91676	2.29868	0.00025	0.00183251	yes
XLOC_024847	XLOC_024847	hs3st3b1a	chr3:50003389 50034716	wt	ele	OK	2.56372	4.83992	0.916743	1.81627	0.0021	0.0110272	yes
XLOC_019008	XLOC_019008	haus1	chr21:5305847 5317006	wt	ele	OK	8.75071	16.5167	0.916453	2.73063	5e-05	0.000441468	yes
XLOC_007466	XLOC_007466	b3galnt2	chr13:50772333 50805930	wt	ele	OK	6.90354	13.03	0.916426	2.76522	5e-05	0.000441468	yes
XLOC_000213	XLOC_000213		Zv9_NA426:10775 14335	wt	ele	OK	3.23946	6.11388	0.916334	2.44881	5e-05	0.000441468	yes
XLOC_005787	XLOC_005787	dcxr	chr12:3635049 3645698	wt	ele	OK	7.5492	14.2468	0.916238	2.74804	5e-05	0.000441468	yes
XLOC_029517	XLOC_029517	ugt2a5	chr5:72898762 72906166	wt	ele	OK	1.70061	3.20859	0.915883	1.96784	0.00035	0.00245539	yes
XLOC_016064	XLOC_016064	SMC6	chr2:5964012 6173674	wt	ele	OK	2.90825	5.48664	0.915773	3.14063	5e-05	0.000441468	yes
XLOC_006417	XLOC_006417	gstal zgc:173961	chr13:701263 728427	wt	ele	OK	40.9547	77.2642	0.915772	4.29146	5e-05	0.000441468	yes
XLOC_035884	XLOC_035884	ENSDARG00000007077	chr9:33873421 33908876	wt	ele	OK	4.10149	7.73725	0.915671	3.37922	5e-05	0.000441468	yes
XLOC_030321	XLOC_030321	ccnb1	chr5:55149483 55153246	wt	ele	OK	60.1814	113.492	0.915206	3.69271	5e-05	0.000441468	yes
XLOC_025350	XLOC_025350	kpna2	chr3:25471233 25478284	wt	ele	OK	133.623	251.928	0.914844	3.77779	5e-05	0.000441468	yes
XLOC_030847	XLOC_030847	sox21a	chr6:7331079 7332155	wt	ele	OK	5.92355	11.1663	0.914614	2.94375	5e-05	0.000441468	yes
XLOC_000775	XLOC_000775		Zv9_scaffold3459:276654 279302	wt	ele	OK	5.1122	9.63655	0.914573	2.43932	0.00165	0.00902625	yes
XLOC_023564	XLOC_023564	anxa2a	chr25:35058723 35074189	wt	ele	OK	38.0646	71.7052	0.913628	3.97661	5e-05	0.000441468	yes
XLOC_020013	XLOC_020013	rgmd	chr22:19914291 19964750	wt	ele	OK	36.7372	69.1712	0.91293	3.87328	5e-05	0.000441468	yes
XLOC_016243	XLOC_016243	ivns1abpb	chr2:22837432 22849680	wt	ele	OK	17.0965	32.1823	0.912561	3.88407	5e-05	0.000441468	yes
XLOC_007106	XLOC_007106	whsc1	chr13:12863007 12900008	wt	ele	OK	15.0377	28.2993	0.912181	3.83458	5e-05	0.000441468	yes
XLOC_019332	XLOC_019332	zgc:56585	chr21:33801627 33809876	wt	ele	OK	3.32628	6.25405	0.910881	2.54604	5e-05	0.000441468	yes
XLOC_013491	XLOC_013491	plekhg7	chr18:15566905 15611780	wt	ele	OK	3.56212	6.69368	0.910063	2.6058	5e-05	0.000441468	yes
XLOC_013291	XLOC_013291	daw1	chr18:44790936 44802533	wt	ele	OK	2.92167	5.48579	0.908907	2.26761	0.0004	0.00274441	yes
XLOC_012129	XLOC_012129	arhgap11a	chr17:734496 755944	wt	ele	OK	10.4621	19.6292	0.907827	3.78538	5e-05	0.000441468	yes
XLOC_021329	XLOC_021329	tpx2	chr23:32267023 32276800	wt	ele	OK	59.7686	112.101	0.907337	3.42584	5e-05	0.000441468	yes
XLOC_013927	XLOC_013927	TGFBR2	chr19:951686 969063	wt	ele	OK	1.01924	1.91155	0.907244	1.79934	0.0022	0.0114559	yes
XLOC_021080	XLOC_021080	HAUS8	chr23:12561494 12594968	wt	ele	OK	7.62368	14.2871	0.906158	2.45166	5e-05	0.000441468	yes
XLOC_013099	XLOC_013099	ctsh	chr18:26208477 26215014	wt	ele	OK	7.22968	13.5453	0.905789	2.77234	5e-05	0.000441468	yes
XLOC_023453	XLOC_023453	hexa	chr25:22940061 22964651	wt	ele	OK	8.86808	16.6104	0.90539	3.27644	5e-05	0.000441468	yes
XLOC_024116	XLOC_024116		chr25:3730985 3731369	wt	ele	OK	26.4298	49.4937	0.905078	4.49067	0.0001	0.000822847	yes
XLOC_015481	XLOC_015481	mknk2a	chr2:22451601 22482596	wt	ele	OK	3.17302	5.94018	0.90465	1.87865	0.0014	0.00787496	yes
XLOC_019612	XLOC_019612	elf3	chr22:636673 640308	wt	ele	OK	5.16438	9.66609	0.904338	2.4846	5e-05	0.000441468	yes
XLOC_006698	XLOC_006698	asrgl1	chr13:27992787 28006654	wt	ele	OK	3.49317	6.53689	0.904067	2.67836	5e-05	0.000441468	yes
XLOC_017901	XLOC_017901	sele	chr20:33973249 34001545	wt	ele	OK	1.27541	2.38669	0.904052	2.44806	5e-05	0.000441468	yes
XLOC_024555	XLOC_024555	zgc:113411	chr3:24919850 24941593	wt	ele	OK	2.50235	4.68178	0.903774	1.8974	0.00045	0.00304428	yes
XLOC_023709	XLOC_023709	pidd	chr25:4723102 4754166	wt	ele	OK	1.22036	2.28277	0.903476	2.28253	0.0001	0.000822847	yes
XLOC_015404	XLOC_015404	selj	chr2:15981488 15992851	wt	ele	OK	13.7088	25.6374	0.903152	3.0036	5e-05	0.000441468	yes
XLOC_012585	XLOC_012585	kcnk5a	chr17:48839341 48861566	wt	ele	OK	1.51111	2.82585	0.903074	2.11322	0.0016	0.00880762	yes
XLOC_034352	XLOC_034352	gstm3	chr8:26155114 26159957	wt	ele	OK	19.0276	35.558	0.902085	3.23831	5e-05	0.000441468	yes
XLOC_035504	XLOC_035504		chr8:54808910 54811548	wt	ele	OK	1.26057	2.35548	0.901946	2.16871	0.0011	0.00641906	yes
XLOC_017972	XLOC_017972	pbk	chr20:39384437 39392715	wt	ele	OK	25.5364	47.684	0.90095	3.77729	5e-05	0.000441468	yes
XLOC_014359	XLOC_014359	tinagl1	chr19:43304941 43370810	wt	ele	OK	7.89858	14.7449	0.900555	2.83164	5e-05	0.000441468	yes
XLOC_035850	XLOC_035850	rnaseh2b	chr9:30704741 30712480	wt	ele	OK	30.076	56.1375	0.900354	3.256	5e-05	0.000441468	yes
XLOC_022445	XLOC_022445	tnfsf10	chr24:27802725 27807780	wt	ele	OK	12.4066	23.1495	0.89987	2.39635	5e-05	0.000441468	yes
XLOC_013040	XLOC_013040	zwilch	chr18:19237358 19265406	wt	ele	OK	5.98221	11.1599	0.899577	2.62516	5e-05	0.000441468	yes
XLOC_017847	XLOC_017847	rrm2	chr20:29518376 29525282	wt	ele	OK	21.5056	40.0858	0.898379	4.05222	5e-05	0.000441468	yes
XLOC_025326	XLOC_025326	MSL1	chr3:23755956 23762235	wt	ele	OK	3.21384	5.99031	0.898335	2.53583	5e-05	0.000441468	yes
XLOC_015651	XLOC_015651	kif2c	chr2:33644785 33668583	wt	ele	OK	18.1438	33.8184	0.898328	3.17525	5e-05	0.000441468	yes
XLOC_035610	XLOC_035610	ptprna	chr9:7590048 7661140	wt	ele	OK	11.1105	20.698	0.897568	3.18023	5e-05	0.000441468	yes
XLOC_010681	XLOC_010681	serpinb1l1 serpinb1l4 si:ch73 303g23.4	chr16:54847384 54904343	wt	ele	OK	13.3056	24.779	0.897081	2.96555	5e-05	0.000441468	yes
XLOC_002455	XLOC_002455	rnaseh2a	chr1:52206820 52214585	wt	ele	OK	24.7873	46.1363	0.896304	3.61304	5e-05	0.000441468	yes
XLOC_008521	XLOC_008521		chr14:33723452 33733219	wt	ele	OK	3.19764	5.95104	0.896133	2.92293	5e-05	0.000441468	yes
XLOC_022534	XLOC_022534	wdr90	chr24:38998044 39044924	wt	ele	OK	1.43989	2.67827	0.895344	2.8183	5e-05	0.000441468	yes
XLOC_003487	XLOC_003487	smc5	chr10:15646671 15673514	wt	ele	OK	8.40094	15.6217	0.89493	2.9113	5e-05	0.000441468	yes
XLOC_023443	XLOC_023443	rad52	chr25:21769144 21785683	wt	ele	OK	5.99277	11.1399	0.894438	2.55045	5e-05	0.000441468	yes
XLOC_028943	XLOC_028943	C5HXorf57	chr5:24619660 24652072	wt	ele	OK	3.24887	6.03098	0.892454	1.94211	0.00175	0.00947703	yes
XLOC_010528	XLOC_010528	map7d1a	chr16:39635328 39727248	wt	ele	OK	3.25594	6.03992	0.891455	2.4865	5e-05	0.000441468	yes
XLOC_015046	XLOC_015046	cdca8	chr19:49493932 49508194	wt	ele	OK	40.1881	74.5132	0.890728	4.12822	5e-05	0.000441468	yes
XLOC_020515	XLOC_020515	s100b	chr22:13991170 14001512	wt	ele	OK	3.76058	6.96793	0.889775	2.16999	0.0005	0.0033237	yes
XLOC_029206	XLOC_029206	sub1b	chr5:42762144 42769912	wt	ele	OK	28.746	53.2473	0.889347	4.19821	5e-05	0.000441468	yes
XLOC_027807	XLOC_027807	si:ch211 209n20.57	chr4:36646516 36858020	wt	ele	OK	2.4946	4.61714	0.88819	2.78632	5e-05	0.000441468	yes
XLOC_022594	XLOC_022594	top1mt	chr24:43770845 43780260	wt	ele	OK	3.85655	7.13779	0.888167	2.32453	0.00265	0.0133022	yes
XLOC_009823	XLOC_009823	serpine2	chr15:42088813 42130944	wt	ele	OK	16.3975	30.3477	0.888116	3.45717	5e-05	0.000441468	yes
XLOC_008102	XLOC_008102	BX088707.1	chr14:40176965 40323945	wt	ele	OK	172.297	318.814	0.887811	3.70754	5e-05	0.000441468	yes
XLOC_015070	XLOC_015070	CLSPN	chr19:50178199 50187870	wt	ele	OK	16.3512	30.2469	0.887391	3.5711	5e-05	0.000441468	yes
XLOC_010900	XLOC_010900	crabp2a	chr16:16678480 16692124	wt	ele	OK	15.4173	28.4981	0.886314	3.96566	5e-05	0.000441468	yes
XLOC_008217	XLOC_008217	mcm7	chr14:201290 212779	wt	ele	OK	83.1955	153.559	0.884213	3.45754	5e-05	0.000441468	yes
XLOC_008624	XLOC_008624		chr14:46992022 46995432	wt	ele	OK	4.46565	8.23732	0.883305	2.70779	0.00015	0.00117124	yes
XLOC_009259	XLOC_009259	NUMA1	chr15:42613843 42623200	wt	ele	OK	11.9484	22.0075	0.881178	2.85289	5e-05	0.000441468	yes
XLOC_026954	XLOC_026954	CR293532.1	chr4:52103817 52112485	wt	ele	OK	2.89383	5.32712	0.880375	1.84414	0.0021	0.0110272	yes
XLOC_031059	XLOC_031059	BX957353.1	chr6:26627608 26653757	wt	ele	OK	1.13637	2.09183	0.880328	1.83344	0.00135	0.00762084	yes
XLOC_034563	XLOC_034563	fzd10	chr8:45837726 45912215	wt	ele	OK	16.4009	30.1663	0.879162	3.71508	5e-05	0.000441468	yes
XLOC_031182	XLOC_031182	itpr1a	chr6:39853915 39923244	wt	ele	OK	2.09604	3.85444	0.878857	3.32859	5e-05	0.000441468	yes
XLOC_018480	XLOC_018480	nr6a1b	chr21:7716739 7761767	wt	ele	OK	1.3785	2.53339	0.877963	1.88757	0.00225	0.0116701	yes
XLOC_001071	XLOC_001071		Zv9_scaffold3545:5289 112230	wt	ele	OK	1.64962	3.03147	0.877882	2.72789	5e-05	0.000441468	yes
XLOC_017712	XLOC_017712	si:dkey 5n18.1	chr20:17080254 17082377	wt	ele	OK	8.42313	15.4782	0.877808	2.99283	0.0001	0.000822847	yes
XLOC_021885	XLOC_021885	racgap1	chr23:33973417 33988915	wt	ele	OK	19.2259	35.322	0.877514	3.48669	5e-05	0.000441468	yes
XLOC_024690	XLOC_024690	hspb9	chr3:33437531 33438196	wt	ele	OK	7.77832	14.2808	0.876543	2.75756	0.0006	0.0038638	yes
XLOC_009742	XLOC_009742	zgc:55413 zgc:77118	chr15:34398713 34422613	wt	ele	OK	2.61343	4.79805	0.876505	1.88927	0.00165	0.00902625	yes
XLOC_006468	XLOC_006468	ppm1g	chr13:5866273 5883082	wt	ele	OK	36.6156	67.184	0.875659	4.08482	5e-05	0.000441468	yes
XLOC_018985	XLOC_018985	setx	chr21:4204681 4251075	wt	ele	OK	3.72794	6.83228	0.873991	2.82485	5e-05	0.000441468	yes
XLOC_006056	XLOC_006056	OGFOD3	chr12:29778775 29897237	wt	ele	OK	4.07473	7.46645	0.873716	1.91078	0.00145	0.00810809	yes
XLOC_000256	XLOC_000256		Zv9_NA470:52694 84836	wt	ele	OK	8.93374	16.3634	0.87314	3.59117	5e-05	0.000441468	yes
XLOC_021988	XLOC_021988	cyp2aa8	chr23:42910749 42919521	wt	ele	OK	12.1707	22.2755	0.872043	3.64308	5e-05	0.000441468	yes
XLOC_013614	XLOC_013614	si:dkey 77f17.1	chr18:26623104 26659531	wt	ele	OK	2.23948	4.09849	0.871929	2.25209	0.00025	0.00183251	yes
XLOC_036453	XLOC_036453	zic5	chr9:32307415 32347632	wt	ele	OK	8.30021	15.1902	0.871924	2.27156	0.00065	0.00413522	yes
XLOC_020125	XLOC_020125	wu:fu71h07	chr22:28429497 28445539	wt	ele	OK	3.01347	5.51047	0.87075	1.66382	0.00255	0.0129234	yes
XLOC_031101	XLOC_031101	SHROOM2	chr6:30116301 30143220	wt	ele	OK	9.07059	16.5768	0.869898	3.53752	5e-05	0.000441468	yes
XLOC_018440	XLOC_018440	phyhd1	chr21:4766981 4783103	wt	ele	OK	8.90179	16.2614	0.869282	2.78974	5e-05	0.000441468	yes
XLOC_000722	XLOC_000722		Zv9_NA979:2 1346	wt	ele	OK	12.6806	23.1613	0.869089	3.31477	0.0012	0.00689731	yes
XLOC_019182	XLOC_019182	skp2	chr21:21281860 21311207	wt	ele	OK	9.93943	18.1534	0.869006	2.67942	5e-05	0.000441468	yes
XLOC_028840	XLOC_028840	rfc5	chr5:13731092 13762969	wt	ele	OK	19.9206	36.3528	0.867804	3.75083	5e-05	0.000441468	yes
XLOC_023375	XLOC_023375	CECR2	chr25:16958894 17045622	wt	ele	OK	7.21746	13.1616	0.866767	2.9824	5e-05	0.000441468	yes
XLOC_007456	XLOC_007456	msh6	chr13:49329285 49402601	wt	ele	OK	12.4905	22.7619	0.865782	2.276	0.00015	0.00117124	yes
XLOC_015068	XLOC_015068		chr19:50167812 50170349	wt	ele	OK	12.8871	23.4725	0.865039	3.2884	0.0006	0.0038638	yes
XLOC_029969	XLOC_029969	dab2	chr5:33961389 33976481	wt	ele	OK	11.0767	20.1725	0.864869	3.39801	5e-05	0.000441468	yes
XLOC_031822	XLOC_031822	sfi1	chr6:40830922 40852662	wt	ele	OK	3.16208	5.75443	0.863799	2.88209	5e-05	0.000441468	yes
XLOC_005351	XLOC_005351	CABZ01044814.2	chr12:17583550 17586054	wt	ele	OK	7.82917	14.2465	0.863676	3.10393	5e-05	0.000441468	yes
XLOC_013484	XLOC_013484	si:dkey 103i16.2	chr18:15045356 15053405	wt	ele	OK	2.99857	5.4527	0.862696	2.35739	0.00065	0.00413522	yes
XLOC_033665	XLOC_033665	mad2l1	chr7:58874320 58882730	wt	ele	OK	48.1571	87.5384	0.862169	4.44084	5e-05	0.000441468	yes
XLOC_034760	XLOC_034760	si:ch211 165l15.1	chr8:6740457 6743626	wt	ele	OK	4.37863	7.95639	0.861635	1.68272	0.00285	0.014106	yes
XLOC_033648	XLOC_033648	galns	chr7:56805951 56896738	wt	ele	OK	6.22152	11.3042	0.861518	2.89893	5e-05	0.000441468	yes
XLOC_030508	XLOC_030508	psat1	chr5:72352360 72365894	wt	ele	OK	62.6376	113.683	0.859911	4.18983	5e-05	0.000441468	yes
XLOC_029377	XLOC_029377		chr5:62750290 62762191	wt	ele	OK	13.8571	25.1481	0.859824	2.03382	0.00065	0.00413522	yes
XLOC_000373	XLOC_000373		Zv9_NA662:3897 4957	wt	ele	OK	4.26404	7.73761	0.859669	2.46371	0.0004	0.00274441	yes
XLOC_005604	XLOC_005604	azi1 st6galnac	chr12:37723793 37931071	wt	ele	OK	8.16821	14.815	0.858962	2.22852	5e-05	0.000441468	yes
XLOC_025643	XLOC_025643	nudt1	chr3:42115947 42120531	wt	ele	OK	3.5362	6.41288	0.858773	2.02691	0.0009	0.00542979	yes
XLOC_031784	XLOC_031784	espl1	chr6:39599714 39632024	wt	ele	OK	9.62053	17.4366	0.857933	3.73134	5e-05	0.000441468	yes
XLOC_035838	XLOC_035838	zgc:162780	chr9:29726899 29730321	wt	ele	OK	3.45293	6.25064	0.856182	1.90462	0.00155	0.00858623	yes
XLOC_018517	XLOC_018517	glrx	chr21:10200336 10244703	wt	ele	OK	43.8104	79.2402	0.854961	4.1289	5e-05	0.000441468	yes
XLOC_012341	XLOC_012341	gb:bc139653	chr17:21120680 21198790	wt	ele	OK	2.05195	3.70978	0.854337	1.79514	0.00265	0.0133022	yes
XLOC_033527	XLOC_033527	shcbp1	chr7:42230705 42254717	wt	ele	OK	6.21718	11.2384	0.854099	3.09784	5e-05	0.000441468	yes
XLOC_031848	XLOC_031848	lrrn1	chr6:43007816 43023475	wt	ele	OK	60.3739	109.044	0.85291	3.53211	5e-05	0.000441468	yes
XLOC_029250	XLOC_029250	ADAMTS3	chr5:46941323 47159464	wt	ele	OK	2.72599	4.92324	0.852831	2.82962	5e-05	0.000441468	yes
XLOC_027303	XLOC_027303	helb	chr4:11834474 11845706	wt	ele	OK	1.56547	2.8263	0.852318	2.09884	0.0003	0.00215436	yes
XLOC_021863	XLOC_021863	ENSDARG00000060394	chr23:32139928 32157923	wt	ele	OK	8.56923	15.4639	0.85167	2.08671	0.00145	0.00810809	yes
XLOC_031067	XLOC_031067	BX890577.1	chr6:27070550 27159321	wt	ele	OK	0.817556	1.47526	0.851579	2.28546	0.0002	0.00151135	yes
XLOC_022723	XLOC_022723	rdh10a	chr24:13155612 13177308	wt	ele	OK	27.2834	49.2118	0.850981	3.65729	5e-05	0.000441468	yes
XLOC_028354	XLOC_028354	ZNF337 si:ch211 207e19.13	chr4:57045956 57077191	wt	ele	OK	3.66367	6.60719	0.850748	2.51442	0.00025	0.00183251	yes
XLOC_002533	XLOC_002533	c3a	chr1:56676992 56723747	wt	ele	OK	52.9888	95.4978	0.84978	3.47005	5e-05	0.000441468	yes
XLOC_023777	XLOC_023777	OLFM4 OLFM4 OLFM4	chr25:12740802 12761654	wt	ele	OK	2.13795	3.85284	0.849694	1.78108	0.0026	0.0131123	yes
XLOC_036055	XLOC_036055	smarcal1	chr9:53943696 54120230	wt	ele	OK	2.9945	5.39405	0.849056	2.43322	5e-05	0.000441468	yes
XLOC_001801	XLOC_001801	asf1bb	chr1:56450236 56461094	wt	ele	OK	23.7883	42.8337	0.848491	3.52636	5e-05	0.000441468	yes
XLOC_013349	XLOC_013349	DHDH	chr18:756211 768393	wt	ele	OK	12.0401	21.6596	0.847152	2.66195	5e-05	0.000441468	yes
XLOC_017078	XLOC_017078	nfkbiaa	chr20:16922346 16925201	wt	ele	OK	6.51493	11.7196	0.847097	2.44882	5e-05	0.000441468	yes
XLOC_007793	XLOC_007793	BSCL2	chr14:6165183 6182148	wt	ele	OK	9.42323	16.9507	0.847049	2.98926	5e-05	0.000441468	yes
XLOC_017621	XLOC_017621	cep128	chr20:6009003 6087735	wt	ele	OK	1.72546	3.10096	0.845731	2.21388	5e-05	0.000441468	yes
XLOC_001926	XLOC_001926	gas6	chr1:187474 213136	wt	ele	OK	10.7305	19.2766	0.845128	3.62511	5e-05	0.000441468	yes
XLOC_010467	XLOC_010467	phc1	chr16:34257007 34274883	wt	ele	OK	7.47909	13.4326	0.844809	3.41471	5e-05	0.000441468	yes
XLOC_017314	XLOC_017314	ephx1	chr20:36652666 36663973	wt	ele	OK	2.6458	4.74995	0.844206	2.326	5e-05	0.000441468	yes
XLOC_034315	XLOC_034315	mapre1a	chr8:24234891 24243160	wt	ele	OK	12.1995	21.8652	0.841818	2.97375	5e-05	0.000441468	yes
XLOC_018459	XLOC_018459	fpgs	chr21:6034592 6054858	wt	ele	OK	7.03989	12.614	0.841406	3.08039	5e-05	0.000441468	yes
XLOC_013126	XLOC_013126	cenpn	chr18:29848421 29855499	wt	ele	OK	7.30261	13.0839	0.841307	2.88709	5e-05	0.000441468	yes
XLOC_035972	XLOC_035972	IKZF2	chr9:41029556 41040651	wt	ele	OK	2.0996	3.76038	0.840766	1.97948	0.00095	0.00567796	yes
XLOC_007940	XLOC_007940	ccng1	chr14:23132060 23143178	wt	ele	OK	359.605	643.874	0.840365	2.99169	5e-05	0.000441468	yes
XLOC_029591	XLOC_029591	si:ch211 160e1.5	chr5:2107091 2108816	wt	ele	OK	26.2703	47.0038	0.839345	3.9327	5e-05	0.000441468	yes
XLOC_020597	XLOC_020597	zbtb7a	chr22:20686538 20707328	wt	ele	OK	1.04342	1.86398	0.837069	1.90241	0.00115	0.00665512	yes
XLOC_007919	XLOC_007919	lygl1	chr14:21894202 21899766	wt	ele	OK	5.70346	10.1874	0.836873	1.96596	0.0008	0.00494223	yes
XLOC_029155	XLOC_029155	cdc42ep2	chr5:39313743 39335914	wt	ele	OK	4.79868	8.57012	0.836679	2.33031	0.0001	0.000822847	yes
XLOC_008038	XLOC_008038	sox3	chr14:33703956 33705712	wt	ele	OK	58.6486	104.74	0.836642	3.95794	5e-05	0.000441468	yes
XLOC_029600	XLOC_029600	CIT	chr5:2523876 2756443	wt	ele	OK	5.81261	10.3793	0.836457	3.48954	5e-05	0.000441468	yes
XLOC_014173	XLOC_014173	nutf2l	chr19:21260307 21266055	wt	ele	OK	39.957	71.3049	0.835554	4.20036	5e-05	0.000441468	yes
XLOC_025255	XLOC_025255	pold1	chr3:16307810 16339225	wt	ele	OK	17.6503	31.4958	0.835464	3.60839	5e-05	0.000441468	yes
XLOC_000624	XLOC_000624		Zv9_NA918:43133 47276	wt	ele	OK	1.9316	3.44445	0.834479	2.61766	5e-05	0.000441468	yes
XLOC_003514	XLOC_003514	ska1	chr10:17573495 17581151	wt	ele	OK	9.95661	17.7532	0.834354	2.70222	5e-05	0.000441468	yes
[truncated: 846 more rows]

## Sheet: BP
GO term	Background frequency	Sample frequency	Expected	+/-	P-value
[truncated: 226 more rows]

## Sheet: GO term piechart 
GO category	UP BP number	UP BP Percentage
[truncated: 18 more rows]
